# Supplementary material for: High frequency of transition to transversion ratio in the stem region of RNA secondary structure of untranslated region of SARS-CoV-2
Source: PeerJ. 2024 Apr 22;12:e16962. doi: 10.7717/peerj.16962 (PMC11044879; doi:10.7717/peerj.16962)
Supplement: Supplemental Information 1 — The mutations in an alignment of high-coverage sequences which were extracted on 24th July 2020 from the GISAID database ( https://www.gisaid.org/) sampled from patients representing an early stage of the adaptation phase of SARS-CoV-2 pandemic in the human population. [file peerj-12-16962-s001.xlsx]

## Sheet: UTR5
Sl	Info	1	2	3	4	5	6	7	8	9	10	11	12	13	14	15	16	17	18	19	20	21	22	23	24	25	26	27	28	29	30	31	32	33	34	35	36	37	38	39	40	41	42	43	44	45	46	47	48
	NCBI	A	T	T	A	A	A	G	G	T	T	T	A	T	A	C	C	T	T	C	C	C	A	G	G	T	A	A	C	A	A	A	C	C	A	A	C	C	A	A	C	T	T	T	C	G	A	T	C
	SLStructureDot-Bracket	.	.	.	.	.	.	(	(	(	(	(	.	(	(	(	(	(	.	.	.	.	)	)	)	)	)	.	.	)	)	)	)	)	.	.	.	[	[	[	.	.	.	.	.	(	(	(	(
1	>hCoV-19/SouthKorea/S5/2020|EPI_ISL_485396|2020-04|1|265	.	.	.	.	.	.	.	.	.	.	.	.	.	.	.	.	.	.	.	.	.	.	.	.	.	.	.	.	.	.	.	.	.	.	.	.	.	.	.	.	.	.	.	.	.	.	.	.
2	>hCoV-19/USA/CruiseA-21/2020|EPI_ISL_414480|2020-0|1|265	.	.	.	.	.	.	.	.	.	.	.	.	.	.	.	.	.	.	.	.	.	.	.	.	.	.	.	.	.	.	.	.	.	.	.	.	.	.	.	.	.	.	.	.	.	.	.	.
3	>hCoV-19/Poland/PL_P17/2020|EPI_ISL_451978|2020-04|1|265	.	.	.	.	.	.	.	.	.	.	.	.	.	.	.	.	.	.	.	.	.	.	.	.	.	.	.	.	.	.	.	.	.	.	.	.	.	.	.	.	.	.	.	.	.	.	.	.
4	>hCoV-19/USA/MO-WUSTL046/2020|EPI_ISL_493075|2020-|1|265	.	.	.	.	.	.	.	.	.	.	.	.	.	.	.	.	.	.	.	.	.	.	.	.	.	.	.	.	.	.	.	.	.	.	.	.	.	.	.	.	.	.	.	.	.	.	.	.
5	>hCoV-19/mink/Netherlands/NB03_index/2020|EPI_ISL_|1|265	.	.	.	.	.	.	.	.	.	.	.	.	.	.	.	.	.	.	.	.	.	.	.	.	.	.	.	.	.	.	.	.	.	.	.	.	.	.	.	.	.	.	.	.	.	.	.	.
6	>hCoV-19/Sweden/20-51831/2020|EPI_ISL_475532|2020-|1|265	.	.	.	.	.	.	.	.	.	.	.	.	.	.	.	.	.	.	.	.	.	.	.	.	.	.	.	.	.	.	.	.	.	.	.	.	.	.	.	.	.	.	.	.	.	.	.	.
7	>hCoV-19/Wuhan/HB-WH4-212/2020|EPI_ISL_454961|2020|1|265	.	.	.	.	.	.	.	.	.	.	.	.	.	.	.	.	.	.	.	.	.	.	.	.	.	.	.	.	.	.	.	.	.	.	.	.	.	.	.	.	.	.	.	.	.	.	.	.
8	>hCoV-19/Sweden/20-50279/2020|EPI_ISL_455903|2020-|1|265	.	.	.	.	.	.	.	.	.	.	.	.	.	.	.	.	.	.	.	.	.	.	.	.	.	.	.	.	.	.	.	.	.	.	.	.	.	.	.	.	.	.	.	.	.	.	.	.
9	>hCoV-19/England/20169018304/2020|EPI_ISL_465202|2|1|265	.	.	.	.	.	.	.	.	.	.	.	.	.	.	.	.	.	.	.	.	.	.	.	.	.	.	.	.	.	.	.	.	.	.	.	.	.	.	.	.	.	.	.	.	.	.	.	.
10	>hCoV-19/Taiwan/TSGH-02/2020|EPI_ISL_426630|2020-0|1|265	.	.	.	.	.	.	.	.	.	.	.	.	.	.	.	.	.	.	.	.	.	.	.	.	.	.	.	.	.	.	.	.	.	.	.	.	.	.	.	.	.	.	.	.	.	.	.	.
11	>hCoV-19/USA/PA-MGEL75/2020|EPI_ISL_454361|2020-03|1|265	.	.	.	.	.	.	.	.	.	.	.	.	.	.	.	.	.	.	.	.	.	.	.	.	.	.	.	.	.	.	.	.	.	.	.	.	.	.	.	.	.	.	.	.	.	.	.	.
12	>hCoV-19/USA/CA-CSMC20/2020|EPI_ISL_475630|2020-03|1|265	.	.	.	.	.	.	.	.	.	.	.	.	.	.	.	.	.	.	.	.	.	.	.	.	.	.	.	.	.	.	.	.	.	.	.	.	.	.	.	.	.	.	.	.	.	.	.	.
13	>hCoV-19/Taiwan/NTU28/2020|EPI_ISL_447622|2020-04-|1|265	.	.	.	.	.	.	.	.	.	.	.	.	.	.	.	.	.	.	.	.	.	.	.	.	.	.	.	.	.	.	.	.	.	.	.	.	.	.	.	.	.	.	.	.	.	.	.	.
14	>hCoV-19/England/OXON-AFD0C/2020|EPI_ISL_478822|20|1|265	.	.	.	.	.	.	.	.	.	.	.	.	.	.	.	.	.	.	.	.	.	.	.	.	.	.	.	.	.	.	.	.	.	.	.	.	.	.	.	.	.	.	.	.	.	.	.	.
15	>hCoV-19/Poland/IHG_PAS_4_67/2020|EPI_ISL_485399|2|1|265	.	.	.	.	.	.	.	.	.	.	.	.	.	.	.	.	.	.	.	.	.	.	.	.	.	.	.	.	.	.	.	.	.	.	.	.	.	.	.	.	.	.	.	.	.	.	.	.
16	>hCoV-19/UnitedArabEmirates/L1189/2020|EPI_ISL_469|1|265	.	.	.	.	.	.	.	.	.	.	.	.	.	.	.	.	.	.	.	.	.	.	.	.	.	.	.	.	.	.	.	.	.	.	.	.	.	.	.	.	.	.	.	.	.	.	.	.
17	>hCoV-19/Bangladesh/BCSIR-NILMRC_107/2020|EPI_ISL_|1|265	.	.	.	.	.	.	.	.	.	.	.	.	.	.	.	.	.	.	.	.	.	.	.	.	.	.	.	.	.	.	.	.	.	.	.	.	.	.	.	.	.	.	.	.	.	.	.	.
18	>hCoV-19/France/GE1977/2020|EPI_ISL_414632|2020-03|1|265	.	.	.	.	.	.	.	.	.	.	.	.	.	.	.	.	.	.	.	.	.	.	.	.	.	.	.	.	.	.	.	.	.	.	.	.	.	.	.	.	.	.	.	.	.	.	.	.
19	>hCoV-19/USA/OR-PROV-095/2020|EPI_ISL_482366|2020-|1|265	.	.	.	.	.	.	.	.	.	.	.	.	.	.	.	.	.	.	.	.	.	.	.	.	.	.	.	.	.	.	.	.	.	.	.	.	.	.	.	.	.	.	.	.	.	.	.	.
20	>hCoV-19/England/OXON-B15C3/2020|EPI_ISL_479027|20|1|265	.	.	.	.	.	.	.	.	.	.	.	.	.	.	.	.	.	.	.	.	.	.	.	.	.	.	.	.	.	.	.	.	.	.	.	.	.	.	.	.	.	.	.	.	.	.	.	.
21	>hCoV-19/India/NCDC-4189/2020|EPI_ISL_436450|2020-|1|265	.	.	.	.	.	.	.	.	.	.	.	.	.	.	.	.	.	.	.	.	.	.	.	.	.	.	.	.	.	.	.	.	.	.	.	.	.	.	.	.	.	.	.	.	.	.	.	.
22	>hCoV-19/Taiwan/TSGH-26/2020|EPI_ISL_447252|2020-0|1|265	.	.	.	.	.	.	.	.	.	.	.	.	.	.	.	.	.	.	.	.	.	.	.	.	.	.	.	.	.	.	.	.	.	.	.	.	.	.	.	.	.	.	.	.	.	.	.	.
23	>hCoV-19/USA/NY-NYUMC878/2020|EPI_ISL_458017|2020-|1|265	.	.	.	.	.	.	.	.	.	.	.	.	.	.	.	.	.	.	.	.	.	.	.	.	.	.	.	.	.	.	.	.	.	.	.	.	.	.	.	.	.	.	.	.	.	.	.	.
24	>hCoV-19/Poland/PL_P1/2020|EPI_ISL_416488|2020-03-|1|265	.	.	.	.	.	.	.	.	.	.	.	.	.	.	.	.	.	.	.	.	.	.	.	.	.	.	.	.	.	.	.	.	.	.	.	.	.	.	.	.	.	.	.	.	.	.	.	.
25	>hCoV-19/Cyprus/007/2020|EPI_ISL_463747|2020-04-17|1|265	.	.	.	.	.	.	.	.	.	.	.	.	.	.	.	.	.	.	.	.	.	.	.	.	.	.	.	.	.	.	.	.	.	.	.	.	.	.	.	.	.	.	.	.	.	.	.	.
26	>hCoV-19/USA/LA-EVTL155/2020|EPI_ISL_455998|2020-0|1|265	.	.	.	.	.	.	.	.	.	.	.	.	.	.	.	.	.	.	.	.	.	.	.	.	.	.	.	.	.	.	.	.	.	.	.	.	.	.	.	.	.	.	.	.	.	.	.	.
27	>hCoV-19/England/OXON-B0825/2020|EPI_ISL_478913|20|1|265	.	.	.	.	.	.	.	.	.	.	.	.	.	.	.	.	.	.	.	.	.	.	.	.	.	.	.	.	.	.	.	.	.	.	.	.	.	.	.	.	.	.	.	.	.	.	.	.
28	>hCoV-19/England/OXON-AE5D8/2020|EPI_ISL_448705|20|1|265	.	.	.	.	.	.	.	.	.	.	.	.	.	.	.	.	.	.	.	.	.	.	.	.	.	.	.	.	.	.	.	.	.	.	.	.	.	.	.	.	.	.	.	.	.	.	.	.
29	>hCoV-19/SouthAfrica/KRISP-0211/2020|EPI_ISL_48272|1|265	.	.	.	.	.	.	.	.	.	.	.	.	.	.	.	.	.	.	.	.	.	.	.	.	.	.	.	.	.	.	.	.	.	.	.	.	.	.	.	.	.	.	.	.	.	.	.	.
30	>hCoV-19/Sichuan/SC-WCH4-293/2020|EPI_ISL_451394|2|1|265	.	.	.	.	.	.	.	.	.	.	.	.	.	.	.	.	.	.	.	.	.	.	.	.	.	.	.	.	.	.	.	.	.	.	.	.	.	.	.	.	.	.	.	.	.	.	.	.
31	>hCoV-19/Sweden/20-08691/2020|EPI_ISL_430857|2020-|1|265	.	.	.	.	.	.	.	.	.	.	.	.	.	.	.	.	.	.	.	.	.	.	.	.	.	.	.	.	.	.	.	.	.	.	.	.	.	.	.	.	.	.	.	.	.	.	.	.
32	>hCoV-19/Sweden/20-14262/2020|EPI_ISL_469055|2020-|1|265	.	.	.	.	.	.	.	.	.	.	.	.	.	.	.	.	.	.	.	.	.	.	.	.	.	.	.	.	.	.	.	.	.	.	.	.	.	.	.	.	.	.	.	.	.	.	.	.
33	>hCoV-19/Germany/HH-1/2020|EPI_ISL_450413|2020-03-|1|265	.	.	.	.	.	.	.	.	.	.	.	.	.	.	.	.	.	.	.	.	.	.	.	.	.	.	.	.	.	.	.	.	.	.	.	.	.	.	.	.	.	.	.	.	.	.	.	.
34	>hCoV-19/USA/CT-CDC-8001/2020|EPI_ISL_454645|2020-|1|265	.	.	.	.	.	.	.	.	.	.	.	.	.	.	.	.	.	.	.	.	.	.	.	.	.	.	.	.	.	.	.	.	.	.	.	.	.	.	.	.	.	.	.	.	.	.	.	.
35	>hCoV-19/Bangladesh/BCSIR-NILMRC_072/2020|EPI_ISL_|1|265	.	.	.	.	.	.	.	.	.	.	.	.	.	.	.	.	.	.	.	.	.	.	.	.	.	.	.	.	.	.	.	.	.	.	.	.	.	.	.	.	.	.	.	.	.	.	.	.
36	>hCoV-19/USA/LA-EVTL028/2020|EPI_ISL_435566|2020-0|1|265	.	.	.	.	.	.	.	.	.	.	.	.	.	.	.	.	.	.	.	.	.	.	.	.	.	.	.	.	.	.	.	.	.	.	.	.	.	.	.	.	.	.	.	.	.	.	.	.
37	>hCoV-19/France/HF1988/2020|EPI_ISL_414635|2020-03|1|265	.	.	.	.	.	.	.	.	.	.	.	.	.	.	.	.	.	.	.	.	.	.	.	.	.	.	.	.	.	.	.	.	.	.	.	.	.	.	.	.	.	.	.	.	.	.	.	.
38	>hCoV-19/Wuhan/IPBCAMS-WH-02/2019|EPI_ISL_403931|2|1|265	.	.	.	.	.	.	.	.	.	.	.	.	.	.	.	.	.	.	.	.	.	.	.	.	.	.	.	.	.	.	.	.	.	.	.	.	.	.	.	.	.	.	.	.	.	.	.	.
39	>hCoV-19/USA/CA-CSMC137/2020|EPI_ISL_475615|2020-0|1|265	.	.	.	.	.	.	.	.	.	.	.	.	.	.	.	.	.	.	.	.	.	.	.	.	.	.	.	.	.	.	.	.	.	.	.	.	.	.	.	.	.	.	.	.	.	.	.	.
40	>hCoV-19/USA/LA-EVTL138/2020|EPI_ISL_455981|2020-0|1|265	.	.	.	.	.	.	.	.	.	.	.	.	.	.	.	.	.	.	.	.	.	.	.	.	.	.	.	.	.	.	.	.	.	.	.	.	.	.	.	.	.	.	.	.	.	.	.	.
41	>hCoV-19/England/OXON-AC428/2020|EPI_ISL_448449|20|1|265	.	.	.	.	.	.	.	.	.	.	.	.	.	.	.	.	.	.	.	.	.	.	.	.	.	.	.	.	.	.	.	.	.	.	.	.	.	.	.	.	.	.	.	.	.	.	.	.
42	>hCoV-19/SaudiArabia/KAUST-Madinah50/2020|EPI_ISL_|1|265	.	.	.	.	.	.	.	.	.	.	.	.	.	.	.	.	.	.	.	.	.	.	.	.	.	.	.	.	.	.	.	.	.	.	.	.	.	.	.	.	.	.	.	.	.	.	.	.
43	>hCoV-19/Taiwan/TSGH-13/2020|EPI_ISL_428230|2020-0|1|265	.	.	.	.	.	.	.	.	.	.	.	.	.	.	.	.	.	.	.	.	.	.	.	.	.	.	.	.	.	.	.	.	.	.	.	.	.	.	.	.	.	.	.	.	.	.	.	.
44	>hCoV-19/Israel/CVL-n-7920/2020|EPI_ISL_475007|202|1|265	.	.	.	.	.	.	.	.	.	.	.	.	.	.	.	.	.	.	.	.	.	.	.	.	.	.	.	.	.	.	.	.	.	.	.	.	.	.	.	.	.	.	.	.	.	.	.	.
45	>hCoV-19/France/40005BH/2020|EPI_ISL_447658|2020-0|1|265	.	.	.	.	.	.	.	.	.	.	.	.	.	.	.	.	.	.	.	.	.	.	.	.	.	.	.	.	.	.	.	.	.	.	.	.	.	.	.	.	.	.	.	.	.	.	.	.
46	>hCoV-19/SaudiArabia/671/2020|EPI_ISL_490011|2020-|1|265	.	.	.	.	.	.	.	.	.	.	.	.	.	.	.	.	.	.	.	.	.	.	.	.	.	.	.	.	.	.	.	.	.	.	.	.	.	.	.	.	.	.	.	.	.	.	.	.
47	>hCoV-19/UnitedArabEmirates/L0904/2020|EPI_ISL_435|1|265	.	.	.	.	.	.	.	.	.	.	.	.	.	.	.	.	.	.	.	.	.	.	.	.	.	.	.	.	.	.	.	.	.	.	.	.	.	.	.	.	.	.	.	.	.	.	.	.
48	>hCoV-19/USA/WA-UW89/2020|EPI_ISL_416445|2020-03-1|1|265	.	.	.	.	.	.	.	.	.	.	.	.	.	.	.	.	.	.	.	.	.	.	.	.	.	.	.	.	.	.	.	.	.	.	.	.	.	.	.	.	.	.	.	.	.	.	.	.
49	>hCoV-19/env/Wuhan/IVDC-HBF13-21/2020|EPI_ISL_4085|1|265	.	.	.	.	.	.	.	.	.	.	.	.	.	.	.	.	.	.	.	.	.	.	.	.	.	.	.	.	.	.	.	.	.	.	.	.	.	.	.	.	.	.	.	.	.	.	.	A
50	>hCoV-19/England/OXON-B1EF5/2020|EPI_ISL_479101|20|1|265	.	.	.	.	.	.	.	.	.	.	.	.	.	.	.	.	.	.	.	.	.	.	.	.	.	.	.	.	.	.	.	.	.	.	.	.	.	.	.	.	.	.	.	T	.	.	.	.
51	>hCoV-19/Bangladesh/BCSIR-NILMRC_078/2020|EPI_ISL_|1|265	.	.	.	.	.	.	.	.	.	.	.	.	.	.	.	.	.	.	.	.	.	.	.	.	.	.	.	.	.	.	.	.	.	.	.	.	.	.	.	.	.	.	C	.	.	.	.	.
52	>hCoV-19/USA/CA-CSMC33/2020|EPI_ISL_475644|2020-04|1|265	.	.	.	.	.	.	.	.	.	.	.	.	.	.	.	.	.	.	.	.	.	.	.	.	.	.	.	.	.	.	.	.	.	.	.	.	.	.	.	.	.	A	.	.	.	.	.	.
53	>hCoV-19/pangolin/Guangdong/1/2019|EPI_ISL_410721||1|265	.	.	.	.	.	.	.	.	.	.	.	.	.	.	.	.	.	.	.	.	.	.	.	.	.	.	.	.	.	.	.	.	.	.	.	.	.	.	.	.	.	C	.	.	.	.	.	.
54	>hCoV-19/England/OXON-AF0F4/2020|EPI_ISL_448811|20|1|265	.	.	.	.	.	.	.	.	.	.	.	.	.	.	.	.	.	.	.	.	.	.	.	.	.	.	.	.	.	.	.	.	.	.	.	.	.	.	.	.	A	.	.	.	.	.	.	.
55	>hCoV-19/Bahrain/Wuhan-Hu-1/2020|EPI_ISL_485401|20|1|265	.	.	.	.	.	.	.	.	.	.	.	.	.	.	.	.	.	.	.	.	.	.	.	.	.	.	.	.	.	.	.	.	.	.	.	.	.	.	.	.	G	.	.	.	.	.	.	.
56	>hCoV-19/Oman/RESP-20-3080/2020|EPI_ISL_457979|202|1|265	.	.	.	.	.	.	.	.	.	.	.	.	.	.	.	.	.	.	.	.	.	.	.	.	.	.	.	.	.	.	.	.	.	.	.	.	.	.	.	T	.	.	.	.	.	.	.	.
57	>hCoV-19/SriLanka/COV38/2020|EPI_ISL_428670|2020-0|1|265	.	.	.	.	.	.	.	.	.	.	.	.	.	.	.	.	.	.	.	.	.	.	.	.	.	.	.	.	.	.	.	.	.	.	.	.	A	.	.	.	.	.	.	.	.	.	.	.
58	>hCoV-19/England/20119085304/2020|EPI_ISL_465115|2|1|265	.	.	.	.	.	.	.	.	.	.	.	.	.	.	.	.	.	.	.	.	.	.	.	.	.	.	.	.	.	.	.	.	.	.	.	.	T	.	.	.	.	.	.	.	.	.	.	.
59	>hCoV-19/Latvia/019/2020|EPI_ISL_450519|2020-04-14|1|265	.	.	.	.	.	.	.	.	.	.	.	.	.	.	.	.	.	.	.	.	.	.	.	.	.	.	.	.	.	.	.	.	.	.	.	G	.	.	.	.	.	.	.	.	.	.	.	.
60	>hCoV-19/France/BFC6053/2020|EPI_ISL_443307|2020-0|1|265	.	.	.	.	.	.	.	.	.	.	.	.	.	.	.	.	.	.	.	.	.	.	.	.	.	.	.	.	.	.	.	.	.	.	.	T	.	.	.	.	.	.	.	.	.	.	.	.
61	>hCoV-19/USA/OR-PROV-015/2020|EPI_ISL_482302|2020-|1|265	.	.	.	.	.	.	.	.	.	.	.	.	.	.	.	.	.	.	.	.	.	.	.	.	.	.	.	.	.	.	.	T	.	.	.	.	.	.	.	.	.	.	.	.	.	.	.	.
62	>hCoV-19/USA/CA-ALSR-0799-SAN/2020|EPI_ISL_483366||1|265	.	.	.	.	.	.	.	.	.	.	.	.	.	.	.	.	.	.	.	.	.	.	.	.	.	.	.	.	.	.	.	T	.	.	.	.	.	.	.	.	.	.	.	.	.	.	.	.
63	>hCoV-19/Spain/LaRioja201565/2020|EPI_ISL_455339|2|1|265	.	.	.	.	.	.	.	.	.	.	.	.	.	.	.	.	.	.	.	.	.	.	.	.	.	.	.	.	.	T	.	.	.	.	.	.	.	.	.	.	.	.	.	.	.	.	.	.
64	>hCoV-19/SaudiArabia/KAUST-Makkah225/2020|EPI_ISL_|1|265	.	.	.	.	.	.	.	.	.	.	.	.	.	.	.	.	.	.	.	.	.	.	.	.	.	.	.	.	C	.	.	.	.	.	.	.	.	.	.	.	.	.	.	.	.	.	.	.
65	>hCoV-19/Spain/LaRioja201572/2020|EPI_ISL_455342|2|1|265	.	.	.	.	.	.	.	.	.	.	.	.	.	.	.	.	.	.	.	.	.	.	.	.	.	.	.	.	T	.	.	.	.	.	.	.	.	.	.	.	.	.	.	.	.	.	.	.
66	>hCoV-19/France/B5400/2020|EPI_ISL_443276|2020-03-|1|265	.	.	.	.	.	.	.	.	.	.	.	.	.	.	.	.	.	.	.	.	.	.	.	.	.	.	.	T	.	.	.	.	.	.	.	.	.	.	.	.	.	.	.	.	.	.	.	.
67	>hCoV-19/USA/CA-CDPH-UC3/2020|EPI_ISL_413559|2020-|1|265	.	.	.	.	.	.	.	.	.	.	.	.	.	.	.	.	.	.	.	.	T	.	.	.	.	.	.	.	.	.	.	.	.	.	.	.	.	.	.	.	.	.	.	.	.	.	.	.
68	>hCoV-19/Luxembourg/LNS8602041/2020|EPI_ISL_421761|1|265	.	.	.	.	.	.	.	.	.	.	.	.	.	.	.	.	.	.	.	.	T	.	.	.	.	.	.	.	.	.	.	.	.	.	.	.	.	.	.	.	.	.	.	.	.	.	.	.
69	>hCoV-19/England/OXON-AE3FC/2020|EPI_ISL_448689|20|1|265	.	.	.	.	.	.	.	.	.	.	.	.	.	.	.	.	.	.	T	.	.	.	.	.	.	.	.	.	.	.	.	.	.	.	.	.	.	.	.	.	.	.	.	.	.	.	.	.
70	>hCoV-19/Poland/PL_P10/2020|EPI_ISL_451971|2020-04|1|265	.	.	.	.	.	.	.	.	.	.	.	.	.	.	.	.	.	.	T	.	.	.	.	.	.	.	.	.	.	.	.	.	.	.	.	.	.	.	.	.	.	.	.	.	.	.	.	.
71	>hCoV-19/India/NCDC-3394/2020|EPI_ISL_436435|2020-|1|265	.	.	.	.	.	.	.	.	.	.	.	.	.	.	.	A	.	.	.	.	.	.	.	.	.	.	.	.	.	.	.	.	.	.	.	.	.	.	.	.	.	.	.	.	.	.	.	.
72	>hCoV-19/env/Wuhan/IVDC-HBF13-20/2020|EPI_ISL_4085|1|265	.	.	.	.	.	.	.	.	.	.	.	.	.	.	T	.	.	.	.	.	.	.	.	.	.	.	.	.	.	.	.	.	.	.	.	.	.	.	.	.	.	.	.	.	.	.	.	A
73	>hCoV-19/Beijing/DT-travelUK04/2020|EPI_ISL_452336|1|265	.	.	.	.	.	.	.	.	.	.	.	.	A	.	.	.	.	.	.	.	.	.	.	.	.	.	.	.	.	.	.	.	.	.	.	.	.	.	.	.	.	.	.	.	.	.	.	.
74	>hCoV-19/France/HF1993/2020|EPI_ISL_414637|2020-03|1|265	.	.	.	.	.	.	.	.	.	.	.	.	A	.	.	.	.	.	.	.	.	.	.	.	.	.	.	.	.	.	.	.	.	.	.	.	.	.	.	.	.	.	.	.	.	.	.	.
75	>hCoV-19/England/OXON-B1B67/2020|EPI_ISL_479076|20|1|265	.	.	.	.	.	.	.	.	.	.	.	.	C	.	.	.	.	.	.	.	.	.	.	.	.	.	.	.	.	.	.	.	.	.	.	.	.	.	.	.	.	.	.	.	.	.	.	.
76	>hCoV-19/Beijing/DT-travelIT01/2020|EPI_ISL_452352|1|265	.	.	.	.	.	.	.	.	.	.	.	C	.	.	.	.	.	.	.	.	.	.	.	.	.	.	.	.	.	.	.	.	.	.	.	.	.	.	.	.	.	.	.	.	.	.	.	.
77	>hCoV-19/USA/CA-CSMC6/2020|EPI_ISL_475673|2020-03-|1|265	.	.	.	.	.	.	.	.	.	.	.	G	.	.	.	.	.	.	.	.	.	.	.	.	.	.	.	.	.	.	.	.	.	.	.	.	.	.	.	.	.	.	.	.	.	.	.	.
78	>hCoV-19/USA/OR-PROV-231/2020|EPI_ISL_482466|2020-|1|265	.	.	.	.	.	.	.	.	.	.	C	.	.	.	.	.	.	.	.	.	.	.	.	.	.	.	.	.	.	.	.	.	.	.	.	.	.	.	.	.	.	.	.	.	.	.	.	.
79	>hCoV-19/England/OXON-ADFF9/2020|EPI_ISL_448654|20|1|265	.	.	.	.	.	.	.	.	.	.	C	.	.	.	.	.	.	.	.	.	.	.	.	.	.	.	.	.	.	.	.	.	.	.	.	.	.	.	.	.	.	.	.	.	.	.	.	.
80	>hCoV-19/USA/OR-OHSU-0048/2020|EPI_ISL_437528|2020|1|265	.	.	.	.	.	.	.	.	.	A	.	.	.	.	.	.	.	.	.	.	.	.	.	.	.	.	.	.	.	.	.	.	.	.	.	.	.	.	.	.	.	.	.	.	.	.	.	.
81	>hCoV-19/England/20144000404/2020|EPI_ISL_423473|2|1|265	.	.	.	.	.	.	.	.	.	C	.	.	.	.	.	.	.	.	.	.	.	.	.	.	.	.	.	.	.	.	.	.	.	.	.	.	.	.	.	.	.	.	.	.	.	.	.	.
82	>hCoV-19/Russia/Moscow-67142/2020|EPI_ISL_428881|2|1|265	.	.	.	.	.	.	.	.	.	G	.	.	.	.	.	.	.	.	.	.	.	.	.	.	.	.	.	.	.	.	.	.	.	.	.	.	.	.	.	.	.	.	.	.	.	.	.	.
83	>hCoV-19/USA/LA-EVTL071/2020|EPI_ISL_451232|2020-0|1|265	.	.	.	.	.	.	.	.	.	G	.	.	A	.	.	.	.	.	.	.	.	.	.	.	.	.	.	.	.	.	.	.	.	.	.	.	.	.	.	.	.	.	.	.	.	.	.	.
84	>hCoV-19/France/B5322/2020|EPI_ISL_443266|2020-03-|1|265	.	.	.	.	.	G	.	.	.	.	.	.	.	.	.	.	.	.	.	.	.	.	.	.	.	.	.	.	.	.	.	.	.	.	.	.	.	.	.	.	.	.	.	.	.	.	.	.
85	>hCoV-19/Chile/Santiago_12/2020|EPI_ISL_445255|202|1|265	.	.	.	.	G	.	C	.	.	.	.	.	.	.	.	.	.	.	.	.	.	.	.	.	.	.	.	.	.	.	.	.	.	.	.	.	.	.	.	.	.	.	.	.	.	.	.	.
86	>hCoV-19/India/1617/2020|EPI_ISL_421670|2020-03-12|1|265	.	.	.	G	.	.	.	.	.	.	.	.	.	.	.	.	.	.	.	.	.	.	.	.	.	.	.	.	.	.	.	.	.	.	.	.	.	.	.	.	.	.	.	.	.	.	.	.
87	>hCoV-19/Taiwan/5/2020|EPI_ISL_428489|2020-01-31|1|265	.	.	.	T	.	.	.	.	.	.	.	.	.	.	.	.	.	.	.	.	.	.	.	.	.	.	.	.	.	.	.	.	.	.	.	.	.	.	.	.	.	.	.	.	.	.	.	.
88	>hCoV-19/France/HF2239/2020|EPI_ISL_416497|2020-03|1|265	.	.	.	T	.	.	.	.	.	.	.	.	.	.	.	.	.	.	.	.	.	.	.	.	.	.	.	.	.	.	.	.	.	.	.	.	.	.	.	.	.	.	.	.	.	.	.	.
89	>hCoV-19/India/GBRC39/2020|EPI_ISL_444470|2020-04-|1|265	.	.	C	.	.	.	.	.	.	.	.	.	.	.	.	.	.	.	.	.	.	.	.	.	.	.	.	.	.	.	.	.	.	.	.	.	.	.	.	.	.	.	.	.	.	.	.	.
90	>hCoV-19/Chile/Temuco_6/2020|EPI_ISL_445341|2020-0|40|304	.	.	G	.	.	.	.	.	.	.	.	.	.	.	.	.	.	.	.	.	.	.	.	.	.	.	.	.	.	.	.	.	.	.	.	.	.	.	.	.	.	.	.	.	.	.	.	.
91	>hCoV-19/Chile/Rancagua_9/2020|EPI_ISL_445300|2020|1|265	T	.	A	.	T	.	.	.	.	.	.	.	.	.	.	.	.	.	.	.	.	.	.	.	.	.	.	.	.	.	.	.	.	.	.	.	.	.	.	.	.	.	.	.	.	.	.	.
92	>hCoV-19/Chile/Concepcion_3/2020|EPI_ISL_445336|20|56|320	T	.	A	G	.	.	.	.	.	.	.	.	.	.	.	.	.	.	.	.	.	.	.	.	.	.	.	.	.	.	.	.	.	.	.	.	.	.	.	.	.	.	.	.	.	.	.	.
[truncated: 217 more columns]

## Sheet: UTR3
Sl	Info	29675	29676	29677	29678	29679	29680	29681	29682	29683	29684	29685	29686	29687	29688	29689	29690	29691	29692	29693	29694	29695	29696	29697	29698	29699	29700	29701	29702	29703	29704	29705	29706	29707	29708	29709	29710	29711	29712	29713	29714	29715	29716	29717	29718	29719	29720	29721	29722
	NCBI	C	A	A	T	C	T	T	T	A	A	T	C	A	G	T	G	T	G	T	A	A	C	A	T	T	A	G	G	G	A	G	G	A	C	T	T	G	A	A	A	G	A	G	C	C	A	C	C
	SLStructureDot-Bracket	(	(	.	.	.	.	.	.	(	(	(	.	.	.	.	.	.	.	.	.	(	(	(	(	(	(	(	(	(	.	.	.	.	.	.	.	.	.	.	.	.	(	(	(	.	.	(	(
1	>hCoV-19/USA/NY-NYUMC415/2020|EPI_ISL_435482|2020-|29675|29903	.	.	.	.	.	.	.	.	.	.	.	.	.	.	.	.	.	.	.	.	.	.	.	.	.	.	.	.	.	.	.	.	.	.	.	.	.	.	.	.	.	.	.	.	.	.	.	.
2	>hCoV-19/USA/NY-NYUMC445/2020|EPI_ISL_435512|2020-|29675|29903	.	.	.	.	.	.	.	.	.	.	.	.	.	.	.	.	.	.	.	.	.	.	.	.	.	.	.	.	.	.	.	.	.	.	.	.	.	.	.	.	.	.	.	.	.	.	.	.
3	>hCoV-19/Bangladesh/BCSIR-NILMRC_091/2020|EPI_ISL_|29675|29903	.	.	.	.	.	.	.	.	.	.	.	.	.	.	.	.	.	.	.	.	.	.	.	.	.	.	.	.	.	.	.	.	.	.	.	.	.	.	.	.	.	.	.	.	.	.	.	.
4	>hCoV-19/Sweden/20-50900/2020|EPI_ISL_475157|2020-|29675|29903	.	.	.	.	.	.	.	.	.	.	.	.	.	.	.	.	.	.	.	.	.	.	.	.	.	.	.	.	.	.	.	.	.	.	.	.	.	.	.	.	.	.	.	.	.	.	.	.
5	>hCoV-19/USA/NJ-NYUMC841/2020|EPI_ISL_456113|2020-|29675|29903	.	.	.	.	.	.	.	.	.	.	.	.	.	.	.	.	.	.	.	.	.	.	.	.	.	.	.	.	.	.	.	.	.	.	.	.	.	.	.	.	.	.	.	.	.	.	.	.
6	>hCoV-19/USA/NY-NYUMC381/2020|EPI_ISL_430408|2020-|29675|29903	.	.	.	.	.	.	.	.	.	.	.	.	.	.	.	.	.	.	.	.	.	.	.	.	.	.	.	.	.	.	.	.	.	.	.	.	.	.	.	.	.	.	.	.	.	.	.	.
7	>hCoV-19/Sweden/20-14734/2020|EPI_ISL_475520|2020-|29675|29903	.	.	.	.	.	.	.	.	.	.	.	.	.	.	.	.	.	.	.	.	.	.	.	.	.	.	.	.	.	.	.	.	.	.	.	.	.	.	.	.	.	.	.	.	.	.	.	.
8	>hCoV-19/USA/NY-NYUMC127/2020|EPI_ISL_424934|2020-|29675|29903	.	.	.	.	.	.	.	.	.	.	.	.	.	.	.	.	.	.	.	.	.	.	.	.	.	.	.	.	.	.	.	.	.	.	.	.	.	.	.	.	.	.	.	.	.	.	.	.
9	>hCoV-19/USA/CA-CSMC117/2020|EPI_ISL_475593|2020-0|29675|29903	.	.	.	.	.	.	.	.	.	.	.	.	.	.	.	.	.	.	.	.	.	.	.	.	.	.	.	.	.	.	.	.	.	.	.	.	.	.	.	.	.	.	.	.	.	.	.	.
10	>hCoV-19/Wales/PHWC-29C0D/2020|EPI_ISL_432219|2020|29675|29903	.	.	.	.	.	.	.	.	.	.	.	.	.	.	.	.	.	.	.	.	.	.	.	.	.	.	.	.	.	.	.	.	.	.	.	.	.	.	.	.	.	.	.	.	.	.	.	.
11	>hCoV-19/Bangladesh/BCSIR-NILMRC_227/2020|EPI_ISL_|29675|29903	.	.	.	.	.	.	.	.	.	.	.	.	.	.	.	.	.	.	.	.	.	.	.	.	.	.	.	.	.	.	.	.	.	.	.	.	.	.	.	.	.	.	.	.	.	.	.	.
12	>hCoV-19/USA/CA-CSMC55/2020|EPI_ISL_475668|2020-04|29675|29903	.	.	.	.	.	.	.	.	.	.	.	.	.	.	.	.	.	.	.	.	.	.	.	.	.	.	.	.	.	.	.	.	.	.	.	.	.	.	.	.	.	.	.	.	.	.	.	.
13	>hCoV-19/USA/NY-NYUMC536/2020|EPI_ISL_444653|2020-|29675|29903	.	.	.	.	.	.	.	.	.	.	.	.	.	.	.	.	.	.	.	.	.	.	.	.	.	.	.	.	.	.	.	.	.	.	.	.	.	.	.	.	.	.	.	.	.	.	.	.
14	>hCoV-19/USA/NY-NYUMC461/2020|EPI_ISL_435527|2020-|29675|29903	.	.	.	.	.	.	.	.	.	.	.	.	.	.	.	.	.	.	.	.	.	.	.	.	.	.	.	.	.	.	.	.	.	.	.	.	.	.	.	.	.	.	.	.	.	.	.	.
15	>hCoV-19/USA/CA-CSMC122/2020|EPI_ISL_475599|2020-0|29675|29903	.	.	.	.	.	.	.	.	.	.	.	.	.	.	.	.	.	.	.	.	.	.	.	.	.	.	.	.	.	.	.	.	.	.	.	.	.	.	.	.	.	.	.	.	.	.	.	.
16	>hCoV-19/USA/CA-ALSR-1603/2020|EPI_ISL_494684|2020|29675|29903	.	.	.	.	.	.	.	.	.	.	.	.	.	.	.	.	.	.	.	.	.	.	.	.	.	.	.	.	.	.	.	.	.	.	.	.	.	.	.	.	.	.	.	.	.	.	.	.
17	>hCoV-19/Austria/Graz-MUG11/2020|EPI_ISL_437300|20|29675|29903	.	.	.	.	.	.	.	.	.	.	.	.	.	.	.	.	.	.	.	.	.	.	.	.	.	.	.	.	.	.	.	.	.	.	.	.	.	.	.	.	.	.	.	.	.	.	.	.
18	>hCoV-19/Bangladesh/BCSIR-NILMRC_126/2020|EPI_ISL_|29675|29903	.	.	.	.	.	.	.	.	.	.	.	.	.	.	.	.	.	.	.	.	.	.	.	.	.	.	.	.	.	.	.	.	.	.	.	.	.	.	.	.	.	.	.	.	.	.	.	.
19	>hCoV-19/Israel/CVL-n-5991/2020|EPI_ISL_475019|202|29675|29903	.	.	.	.	.	.	.	.	.	.	.	.	.	.	.	.	.	.	.	.	.	.	.	.	.	.	.	.	.	.	.	.	.	.	.	.	.	.	.	.	.	.	.	.	.	.	.	.
20	>hCoV-19/Bangladesh/BCSIR-NILMRC_229/2020|EPI_ISL_|29675|29903	.	.	.	.	.	.	.	.	.	.	.	.	.	.	.	.	.	.	.	.	.	.	.	.	.	.	.	.	.	.	.	.	.	.	.	.	.	.	.	.	.	.	.	.	.	.	.	.
21	>hCoV-19/Israel/CVL-n-9560/2020|EPI_ISL_474971|202|29675|29903	.	.	.	.	.	.	.	.	.	.	.	.	.	.	.	.	.	.	.	.	.	.	.	.	.	.	.	.	.	.	.	.	.	.	.	.	.	.	.	.	.	.	.	.	.	.	.	.
22	>hCoV-19/Taiwan/TSGH-19/2020|EPI_ISL_436104|2020-0|29675|29903	.	.	.	.	.	.	.	.	.	.	.	.	.	.	.	.	.	.	.	.	.	.	.	.	.	.	.	.	.	.	.	.	.	.	.	.	.	.	.	.	.	.	.	.	.	.	.	.
23	>hCoV-19/USA/CA-CZB-1250/2020|EPI_ISL_454670|2020-|29675|29903	.	.	.	.	.	.	.	.	.	.	.	.	.	.	.	.	.	.	.	.	.	.	.	.	.	.	.	.	.	.	.	.	.	.	.	.	.	.	.	.	.	.	.	.	.	.	.	.
24	>hCoV-19/Sweden/20-14519/2020|EPI_ISL_475517|2020-|29675|29903	.	.	.	.	.	.	.	.	.	.	.	.	.	.	.	.	.	.	.	.	.	.	.	.	.	.	.	.	.	.	.	.	.	.	.	.	.	.	.	.	.	.	.	.	.	.	.	.
25	>hCoV-19/Bangladesh/BCSIR-NILMRC_017/2020|EPI_ISL_|29675|29903	.	.	.	.	.	.	.	.	.	.	.	.	.	.	.	.	.	.	.	.	.	.	.	.	.	.	.	.	.	.	.	.	.	.	.	.	.	.	.	.	.	.	.	.	.	.	.	.
26	>hCoV-19/Italy/FVG-ICGEB_atr21/2020|EPI_ISL_479790|29675|29903	.	.	.	.	.	.	.	.	.	.	.	.	.	.	.	.	.	.	.	.	.	.	.	.	.	.	.	.	.	.	.	.	.	.	.	.	.	.	.	.	.	.	.	.	.	.	.	.
27	>hCoV-19/USA/CA-CSMC135/2020|EPI_ISL_475613|2020-0|29675|29903	.	.	.	.	.	.	.	.	.	.	.	.	.	.	.	.	.	.	.	.	.	.	.	.	.	.	.	.	.	.	.	.	.	.	.	.	.	.	.	.	.	.	.	.	.	.	.	.
28	>hCoV-19/SaudiArabia/KAUST-Makkah166/2020|EPI_ISL_|29675|29903	.	.	.	.	.	.	.	.	.	.	.	.	.	.	.	.	.	.	.	.	.	.	.	.	.	.	.	.	.	.	.	.	.	.	.	.	.	.	.	.	.	.	.	.	.	.	.	.
29	>hCoV-19/USA/CA-CSMC56/2020|EPI_ISL_475669|2020-04|29675|29903	.	.	.	.	.	.	.	.	.	.	.	.	.	.	.	.	.	.	.	.	.	.	.	.	.	.	.	.	.	.	.	.	.	.	.	.	.	.	.	.	.	.	.	.	.	.	.	.
30	>hCoV-19/Wuhan/HB-WHCM-107/2020|EPI_ISL_454990|202|29675|29903	.	.	.	.	.	.	.	.	.	.	.	.	.	.	.	.	.	.	.	.	.	.	.	.	.	.	.	.	.	.	.	.	.	.	.	.	.	.	.	.	.	.	.	.	.	.	.	.
31	>hCoV-19/USA/NY-NYUMC410/2020|EPI_ISL_435477|2020-|29675|29903	.	.	.	.	.	.	.	.	.	.	.	.	.	.	.	.	.	.	.	.	.	.	.	.	.	.	.	.	.	.	.	.	.	.	.	.	.	.	.	.	.	.	.	.	.	.	.	.
32	>hCoV-19/Sichuan/SC-PHCC1-036/2020|EPI_ISL_451357||29675|29903	.	.	.	.	.	.	.	.	.	.	.	.	.	.	.	.	.	.	.	.	.	.	.	.	.	.	.	.	.	.	.	.	.	.	.	.	.	.	.	.	.	.	.	.	.	.	.	.
33	>hCoV-19/USA/OR-PROV-232/2020|EPI_ISL_482467|2020-|29675|29903	.	.	.	.	.	.	.	.	.	.	.	.	.	.	.	.	.	.	.	.	.	.	.	.	.	.	.	.	.	.	.	.	.	.	.	.	.	.	.	.	.	.	.	.	.	.	.	.
34	>hCoV-19/Sweden/20-51167/2020|EPI_ISL_450832|2020-|29675|29903	.	.	.	.	.	.	.	.	.	.	.	.	.	.	.	.	.	.	.	.	.	.	.	.	.	.	.	.	.	.	.	.	.	.	.	.	.	.	.	.	.	.	.	.	.	.	.	.
35	>hCoV-19/England/OXON-AEA15/2020|EPI_ISL_448747|20|29675|29903	.	.	.	.	.	.	.	.	.	.	.	.	.	.	.	.	.	.	.	.	.	.	.	.	.	.	.	.	.	.	.	.	.	.	.	.	.	.	.	.	.	.	.	.	.	.	.	.
36	>hCoV-19/USA/NY-NYUMC249/2020|EPI_ISL_428763|2020-|29675|29903	.	.	.	.	.	.	.	.	.	.	.	.	.	.	.	.	.	.	.	.	.	.	.	.	.	.	.	.	.	.	.	.	.	.	.	.	.	.	.	.	.	.	.	.	.	.	.	.
37	>hCoV-19/USA/CA-ALSR-1065-SAN/2020|EPI_ISL_483495||29675|29903	.	.	.	.	.	.	.	.	.	.	.	.	.	.	.	.	.	.	.	.	.	.	.	.	.	.	.	.	.	.	.	.	.	.	.	.	.	.	.	.	.	.	.	.	.	.	.	.
38	>hCoV-19/USA/NY-NYUMC451/2020|EPI_ISL_435518|2020-|29675|29903	.	.	.	.	.	.	.	.	.	.	.	.	.	.	.	.	.	.	.	.	.	.	.	.	.	.	.	.	.	.	.	.	.	.	.	.	.	.	.	.	.	.	.	.	.	.	.	.
39	>hCoV-19/Romania/284508/2020|EPI_ISL_455471|2020-0|29675|29903	.	.	.	.	.	.	.	.	.	.	.	.	.	.	.	.	.	.	.	.	.	.	.	.	.	.	.	.	.	.	.	.	.	.	.	.	.	.	.	.	.	.	.	.	.	.	.	T
40	>hCoV-19/SaudiArabia/KAUST-Makkah138/2020|EPI_ISL_|29675|29903	.	.	.	.	.	.	.	.	.	.	.	.	.	.	.	.	.	.	.	.	.	.	.	.	.	.	.	.	.	.	.	.	.	.	.	.	.	.	.	.	.	.	.	.	A	.	.	.
41	>hCoV-19/Korea/KCDC2027/2020|EPI_ISL_471443|2020-0|29675|29903	.	.	.	.	.	.	.	.	.	.	.	.	.	.	.	.	.	.	.	.	.	.	.	.	.	.	.	.	.	.	.	.	.	.	.	.	.	.	.	.	.	.	A	.	.	.	.	.
42	>hCoV-19/Sweden/20-50486/2020|EPI_ISL_475143|2020-|29675|29903	.	.	.	.	.	.	.	.	.	.	.	.	.	.	.	.	.	.	.	.	.	.	.	.	.	.	.	.	.	.	.	.	.	.	.	.	T	.	.	.	.	.	.	.	.	.	.	.
43	>hCoV-19/Latvia/047/2020|EPI_ISL_486431|2020-03-16|29675|29903	.	.	.	.	.	.	.	.	.	.	.	.	.	.	.	.	.	.	.	.	.	.	.	.	.	.	.	.	.	.	.	.	.	T	.	.	.	.	.	.	.	.	.	.	.	.	.	.
44	>hCoV-19/England/OXON-AE07D/2020|EPI_ISL_448659|20|29675|29903	.	.	.	.	.	.	.	.	.	.	.	.	.	.	.	.	.	.	.	.	.	.	.	.	.	.	.	.	.	.	.	T	.	.	.	.	.	.	.	.	.	.	.	.	.	.	.	.
45	>hCoV-19/Sweden/20-14785/2020|EPI_ISL_469062|2020-|29675|29903	.	.	.	.	.	.	.	.	.	.	.	.	.	.	.	.	.	.	.	.	.	.	.	.	.	.	.	.	.	.	T	.	.	.	.	.	.	.	.	.	.	.	.	.	.	.	.	.
46	>hCoV-19/Sweden/20-14131/2020|EPI_ISL_475511|2020-|29675|29903	.	.	.	.	.	.	.	.	.	.	.	.	.	.	.	.	.	.	.	.	.	.	.	.	.	.	.	T	.	.	.	.	.	.	.	.	.	.	.	.	.	.	.	.	.	.	.	.
47	>hCoV-19/USA/WA-UW-8150/2020|EPI_ISL_486112|2020-0|29675|29903	.	.	.	.	.	.	.	.	.	.	.	.	.	.	.	.	.	.	.	.	.	.	.	.	.	G	.	.	.	.	.	.	.	.	.	.	.	.	.	.	.	.	.	.	.	.	.	.
48	>hCoV-19/USA/NY-NYUMC894/2020|EPI_ISL_467387|2020-|29675|29903	.	.	.	.	.	.	.	.	.	.	.	.	.	.	.	.	.	.	.	.	.	.	.	.	.	G	.	.	.	.	.	.	.	.	.	.	.	.	.	.	.	.	.	.	.	.	.	.
49	>hCoV-19/Fuyang/FY002/2020|EPI_ISL_424352|2020-03-|29675|29903	.	.	.	.	.	.	.	.	.	.	.	.	.	.	.	.	.	.	.	.	G	.	.	.	.	.	.	.	.	.	.	.	.	.	.	.	.	.	.	.	.	.	.	.	.	.	.	.
50	>hCoV-19/env/Beijing/IVDC-03-06/2020|EPI_ISL_46925|29675|29903	.	.	.	.	.	.	.	.	.	.	.	.	.	.	.	.	.	.	.	C	.	.	.	.	.	.	.	.	.	.	.	.	.	.	.	.	.	.	.	.	.	.	.	.	.	.	.	.
51	>hCoV-19/Spain/Barcelona_VH1407/2020|EPI_ISL_44497|29675|29903	.	.	.	.	.	.	.	.	.	.	.	.	.	C	.	.	.	.	.	.	.	.	.	.	.	.	.	.	.	.	.	.	.	.	.	.	.	.	.	.	.	.	.	.	.	.	.	.
52	>hCoV-19/USA/OR-PROV-087/2020|EPI_ISL_482358|2020-|29675|29903	.	.	.	.	.	.	.	.	.	.	.	.	.	T	.	.	.	.	.	.	.	.	.	.	.	.	.	.	.	.	.	.	.	.	.	.	.	.	.	.	.	.	.	.	.	.	.	.
53	>hCoV-19/Indonesia/JKT-EIJK2444/2020|EPI_ISL_43528|29675|29903	.	.	.	.	.	.	.	.	.	.	A	.	.	.	.	.	.	.	.	.	.	.	.	.	.	.	.	.	.	.	.	.	.	.	.	.	.	.	.	.	.	.	.	.	.	.	.	.
[truncated: 108 more columns]
