# Supplementary material for: High frequency of transition to transversion ratio in the stem region of RNA secondary structure of untranslated region of SARS-CoV-2
Source: PeerJ. 2024 Apr 22;12:e16962. doi: 10.7717/peerj.16962 (PMC11044879; doi:10.7717/peerj.16962)
Supplement: Supplemental Information 2 — These are high-coverage sequences of dominant variants of Delta and Omicron strains reported in the GISAID database up to 24th September 2023. [file peerj-12-16962-s002.xlsx]

## Sheet: UTR3
Sl	Variant	Info	1	2	3	4	5	6	7	8	9	10	11	12	13	14	15	16	17	18	19	20	21	22	23	24	25	26	27	28	29	30	31	32	33	34	35	36	37	38	39	40	41	42	43	44	45	46	47
1	Delta	>153966|29662|29890	C	A	A	T	C	T	T	T	A	A	T	C	A	G	T	G	T	G	T	A	A	C	A	T	T	A	G	G	G	A	G	G	A	C	T	T	G	A	A	A	G	A	G	C	C	A	C
2	Delta	>153959|29662|29890	C	A	A	T	C	T	T	T	A	A	T	C	A	G	T	G	T	G	T	A	A	C	A	T	T	A	G	G	G	A	G	G	A	C	T	T	G	A	A	A	G	A	G	C	C	A	C
3	Delta	>143750|29662|29890	C	A	A	T	C	T	T	T	A	A	T	C	A	G	T	G	T	G	T	A	A	C	A	T	T	A	G	G	G	A	G	G	A	C	T	T	G	A	A	A	G	A	G	C	C	A	C
4	Delta	>143712|29662|29890	C	A	A	T	C	T	T	T	A	A	T	C	A	G	T	G	T	G	T	A	A	C	A	T	T	A	G	G	G	A	G	G	A	C	T	T	G	A	A	A	G	A	G	C	C	A	C
5	Delta	>143695|29657|29885	C	A	A	T	C	T	T	T	A	A	T	C	A	G	T	G	T	G	T	A	A	C	A	T	T	A	G	G	G	A	G	G	A	C	T	T	G	A	A	A	G	A	G	C	C	A	C
6	Delta	>143694|29668|29896	C	A	A	T	C	T	T	T	A	A	T	C	A	G	T	G	T	G	T	A	A	C	A	T	T	A	G	G	G	A	G	G	A	C	T	T	G	A	A	A	G	A	G	C	C	A	C
7	Delta	>143689|29662|29890	C	A	A	T	C	T	T	T	A	A	T	C	A	G	T	G	T	G	T	A	A	C	A	T	T	A	G	G	G	A	G	G	A	C	T	T	G	A	A	A	G	A	G	C	C	A	C
8	Delta	>143667|29653|29881	C	A	A	T	C	T	T	T	A	A	T	C	A	G	T	G	T	G	T	A	A	C	A	T	T	A	G	G	G	A	G	G	A	C	T	T	G	A	A	A	G	A	G	C	C	A	C
9	Delta	>143664|29668|29896	C	A	A	T	C	T	T	T	A	A	T	C	A	G	T	G	T	G	T	A	A	C	A	T	T	A	G	G	G	A	G	G	A	C	T	T	G	A	A	A	G	A	G	C	C	A	C
10	Delta	>143656|29662|29890	C	A	A	T	C	T	T	T	A	A	T	C	A	G	T	G	T	G	T	A	A	C	A	T	T	A	G	G	G	A	G	G	A	C	T	T	G	A	A	A	G	A	G	C	C	A	C
11	Delta	>143643|29668|29896	C	A	A	T	C	T	T	T	A	A	T	C	A	G	T	G	T	G	T	A	A	C	A	T	T	A	G	G	G	A	G	G	A	C	T	T	G	A	A	A	G	A	G	C	C	A	C
12	Delta	>143641|29662|29890	C	A	A	T	C	T	T	T	A	A	T	C	A	G	T	G	T	G	T	A	A	C	A	T	T	A	G	G	G	A	G	G	A	C	T	T	G	A	A	A	G	A	G	C	C	A	C
13	Delta	>143640|29662|29890	C	A	A	T	C	T	T	T	A	A	T	C	A	G	T	G	T	G	T	A	A	C	A	T	T	A	G	G	G	A	G	G	A	C	T	T	G	A	A	A	G	A	G	C	C	A	C
14	Delta	>143619|29659|29887	C	A	A	T	C	T	T	T	A	A	T	C	A	G	T	G	T	G	T	A	A	C	A	T	T	A	G	G	G	A	G	G	A	C	T	T	G	A	A	A	G	A	G	C	C	A	C
15	Delta	>143616|29662|29890	C	A	A	T	C	T	T	T	A	A	T	C	A	G	T	G	T	G	T	A	A	C	A	T	T	A	G	G	G	A	G	G	A	C	T	T	G	A	A	A	G	A	G	C	C	A	C
16	Delta	>143561|29653|29881	C	A	A	T	C	T	T	T	A	A	T	C	A	G	T	G	T	G	T	A	A	C	A	T	T	A	G	G	G	A	G	G	A	C	T	T	G	A	A	A	G	A	G	C	C	A	C
17	Delta	>143560|29662|29890	C	A	A	T	C	T	T	T	A	A	T	C	A	G	T	G	T	G	T	A	A	C	A	T	T	A	G	G	G	A	G	G	A	C	T	T	G	A	A	A	G	A	G	C	C	A	C
18	Delta	>143510|29659|29887	C	A	A	T	C	T	T	T	A	A	T	C	A	G	T	G	T	G	T	A	A	C	A	T	T	A	G	G	G	A	G	G	A	C	T	T	G	A	A	A	G	A	G	C	C	A	C
19	Delta	>143424|29662|29890	C	A	A	T	C	T	T	T	A	A	T	C	A	G	T	G	T	G	T	A	A	C	A	T	T	A	G	G	G	A	G	G	A	C	T	T	G	A	A	A	G	A	G	C	C	A	C
20	Delta	>143415|29662|29890	C	A	A	T	C	T	T	T	A	A	T	C	A	G	T	G	T	G	T	A	A	C	A	T	T	A	G	G	G	A	G	G	A	C	T	T	G	A	A	A	G	A	G	C	C	A	C
21	Delta	>143411|29653|29881	C	A	A	T	C	T	T	T	A	A	T	C	A	G	T	G	T	G	T	A	A	C	A	T	T	A	G	G	G	A	G	G	A	C	T	T	G	A	A	A	G	A	G	C	C	A	C
22	Delta	>143405|29662|29890	C	A	A	T	C	T	T	T	A	A	T	C	A	G	T	G	T	G	T	A	A	C	A	T	T	A	G	G	G	A	G	G	A	C	T	T	G	A	A	A	G	A	G	C	C	A	C
23	Delta	>143399|29668|29896	C	A	A	T	C	T	T	T	A	A	T	C	A	G	T	G	T	G	T	A	A	C	A	T	T	A	G	G	G	A	G	G	A	C	T	T	G	A	A	A	G	A	G	C	C	A	C
24	Delta	>143348|29662|29890	C	A	A	T	C	T	T	T	A	A	T	C	A	G	T	G	T	G	T	A	A	C	A	T	T	A	G	G	G	A	G	G	A	C	T	T	G	A	A	A	G	A	G	C	C	A	C
25	Delta	>142569|29662|29890	C	A	A	T	C	T	T	T	A	A	T	C	A	G	T	G	T	G	T	A	A	C	A	T	T	A	G	G	G	A	G	G	A	C	T	T	G	A	A	A	G	A	G	C	C	A	C
26	Delta	>138689|29671|29899	C	A	A	T	C	T	T	T	A	A	T	C	A	G	T	G	T	G	T	A	A	C	A	T	T	A	G	G	G	A	G	G	A	C	T	T	G	A	A	A	G	A	G	C	C	A	C
27	Delta	>138687|29648|29876	C	A	A	T	C	T	T	T	A	A	T	C	A	G	T	G	T	G	T	A	A	C	A	T	T	A	G	G	G	A	G	G	A	C	T	T	G	A	A	A	G	A	G	C	C	A	C
28	Delta	>138686|29646|29874	C	A	A	T	C	T	T	T	A	A	T	C	A	G	T	G	T	G	T	A	A	C	A	T	T	A	G	G	G	A	G	G	A	C	T	T	G	A	A	A	G	A	G	C	C	A	C
29	Delta	>138685|29646|29874	C	A	A	T	C	T	T	T	A	A	T	C	A	G	T	G	T	G	T	A	A	C	A	T	T	A	G	G	G	A	G	G	A	C	T	T	G	A	A	A	G	A	G	C	C	A	C
30	Delta	>138684|29673|29901	C	A	A	T	C	T	T	T	A	A	T	C	A	G	T	G	T	G	T	A	A	C	A	T	T	A	G	G	G	A	G	G	A	C	T	T	G	A	A	A	G	A	G	C	C	A	C
31	Delta	>138683|29665|29893	C	A	A	T	C	T	T	T	A	A	T	C	A	G	T	G	T	G	T	A	A	C	A	T	T	A	G	G	G	A	G	G	A	C	T	T	G	A	A	A	G	A	G	C	C	A	C
32	Delta	>138680|29669|29897	C	A	A	T	C	T	T	T	A	A	T	C	A	G	T	G	T	G	T	A	A	C	A	T	T	A	G	G	G	A	G	G	A	C	T	T	G	A	A	A	G	A	G	C	C	A	C
33	Delta	>138635|29644|29872	C	A	A	T	C	T	T	T	A	A	T	C	A	G	T	G	T	G	T	A	A	C	A	T	T	A	G	G	G	A	G	G	A	C	T	T	G	A	A	A	G	A	G	C	C	A	C
34	Delta	>138634|29645|29873	C	A	A	T	C	T	T	T	A	A	T	C	A	G	T	G	T	G	T	A	A	C	A	T	T	A	G	G	G	A	G	G	A	C	T	T	G	A	A	A	G	A	G	C	C	A	C
35	Delta	>138630|29673|29901	C	A	A	T	C	T	T	T	A	A	T	C	A	G	T	G	T	G	T	A	A	C	A	T	T	A	G	G	G	A	G	G	A	C	T	T	G	A	A	A	G	A	G	C	C	A	C
36	Delta	>138628|29643|29871	C	A	A	T	C	T	T	T	A	A	T	C	A	G	T	G	T	G	T	A	A	C	A	T	T	A	G	G	G	A	G	G	A	C	T	T	G	A	A	A	G	A	G	C	C	A	C
37	Delta	>138627|29669|29897	C	A	A	T	C	T	T	T	A	A	T	C	A	G	T	G	T	G	T	A	A	C	A	T	T	A	G	G	G	A	G	G	A	C	T	T	G	A	A	A	G	A	G	C	C	A	C
38	Delta	>138169|29650|29878	C	A	A	T	C	T	T	T	A	A	T	C	A	G	T	G	T	G	T	A	A	C	A	T	T	A	G	G	G	A	G	G	A	C	T	T	G	A	A	A	G	A	G	C	C	A	C
39	Delta	>138167|29665|29893	C	A	A	T	C	T	T	T	A	A	T	C	A	G	T	G	T	G	T	A	A	C	A	T	T	A	G	G	G	A	G	G	A	C	T	T	G	A	A	A	G	A	G	C	C	A	C
40	Delta	>138164|29670|29898	C	A	A	T	C	T	T	T	A	A	T	C	A	G	T	G	T	G	T	A	A	C	A	T	T	A	G	G	G	A	G	G	A	C	T	T	G	A	A	A	G	A	G	C	C	A	C
41	Delta	>138161|29646|29874	C	A	A	T	C	T	T	T	A	A	T	C	A	G	T	G	T	G	T	A	A	C	A	T	T	A	G	G	G	A	G	G	A	C	T	T	G	A	A	A	G	A	G	C	C	A	C
42	Delta	>138160|29645|29873	C	A	A	T	C	T	T	T	A	A	T	C	A	G	T	G	T	G	T	A	A	C	A	T	T	A	G	G	G	A	G	G	A	C	T	T	G	A	A	A	G	A	G	C	C	A	C
43	Delta	>138159|29667|29895	C	A	A	T	C	T	T	T	A	A	T	C	A	G	T	G	T	G	T	A	A	C	A	T	T	A	G	G	G	A	G	G	A	C	T	T	G	A	A	A	G	A	G	C	C	A	C
44	Delta	>138158|29659|29887	C	A	A	T	C	T	T	T	A	A	T	C	A	G	T	G	T	G	T	A	A	C	A	T	T	A	G	G	G	A	G	G	A	C	T	T	G	A	A	A	G	A	G	C	C	A	C
45	Delta	>138157|29671|29899	C	A	A	T	C	T	T	T	A	A	T	C	A	G	T	G	T	G	T	A	A	C	A	T	T	A	G	G	G	A	G	G	A	C	T	T	G	A	A	A	G	A	G	C	C	A	C
46	Delta	>138156|29648|29876	C	A	A	T	C	T	T	T	A	A	T	C	A	G	T	G	T	G	T	A	A	C	A	T	T	A	G	G	G	A	G	G	A	C	T	T	G	A	A	A	G	A	G	C	C	A	C
47	Delta	>138060|29672|29900	C	A	A	T	C	T	T	T	A	A	T	C	A	G	T	G	T	G	T	A	A	C	A	T	T	A	G	G	G	A	G	G	A	C	T	T	G	A	A	A	G	A	G	C	C	A	C
48	Delta	>138002|29647|29875	C	A	A	T	C	T	T	T	A	A	T	C	A	G	T	G	T	G	T	A	A	C	A	T	T	A	G	G	G	A	G	G	A	C	T	T	G	A	A	A	G	A	G	C	C	A	C
49	Delta	>138001|29661|29889	C	A	A	T	C	T	T	T	A	A	T	C	A	G	T	G	T	G	T	A	A	C	A	T	T	A	G	G	G	A	G	G	A	C	T	T	G	A	A	A	G	A	G	C	C	A	C
50	Delta	>138000|29645|29873	C	A	A	T	C	T	T	T	A	A	T	C	A	G	T	G	T	G	T	A	A	C	A	T	T	A	G	G	G	A	G	G	A	C	T	T	G	A	A	A	G	A	G	C	C	A	C
51	Delta	>137999|29645|29873	C	A	A	T	C	T	T	T	A	A	T	C	A	G	T	G	T	G	T	A	A	C	A	T	T	A	G	G	G	A	G	G	A	C	T	T	G	A	A	A	G	A	G	C	C	A	C
52	Delta	>137998|29646|29874	C	A	A	T	C	T	T	T	A	A	T	C	A	G	T	G	T	G	T	A	A	C	A	T	T	A	G	G	G	A	G	G	A	C	T	T	G	A	A	A	G	A	G	C	C	A	C
53	Delta	>137997|29645|29873	C	A	A	T	C	T	T	T	A	A	T	C	A	G	T	G	T	G	T	A	A	C	A	T	T	A	G	G	G	A	G	G	A	C	T	T	G	A	A	A	G	A	G	C	C	A	C
54	Delta	>137996|29670|29898	C	A	A	T	C	T	T	T	A	A	T	C	A	G	T	G	T	G	T	A	A	C	A	T	T	A	G	G	G	A	G	G	A	C	T	T	G	A	A	A	G	A	G	C	C	A	C
55	Delta	>137898|29650|29878	C	A	A	T	C	T	T	T	A	A	T	C	A	G	T	G	T	G	T	A	A	C	A	T	T	A	G	G	G	A	G	G	A	C	T	T	G	A	A	A	G	A	G	C	C	A	C
56	Delta	>137897|29650|29878	C	A	A	T	C	T	T	T	A	A	T	C	A	G	T	G	T	G	T	A	A	C	A	T	T	A	G	G	G	A	G	G	A	C	T	T	G	A	A	A	G	A	G	C	C	A	C
57	Delta	>137895|29650|29878	C	A	A	T	C	T	T	T	A	A	T	C	A	G	T	G	T	G	T	A	A	C	A	T	T	A	G	G	G	A	G	G	A	C	T	T	G	A	A	A	G	A	G	C	C	A	C
58	Delta	>137890|29659|29887	C	A	A	T	C	T	T	T	A	A	T	C	A	G	T	G	T	G	T	A	A	C	A	T	T	A	G	G	G	A	G	G	A	C	T	T	G	A	A	A	G	A	G	C	C	A	C
59	Delta	>137886|29653|29881	C	A	A	T	C	T	T	T	A	A	T	C	A	G	T	G	T	G	T	A	A	C	A	T	T	A	G	G	G	A	G	G	A	C	T	T	G	A	A	A	G	A	G	C	C	A	C
60	Delta	>137884|29662|29890	C	A	A	T	C	T	T	T	A	A	T	C	A	G	T	G	T	G	T	A	A	C	A	T	T	A	G	G	G	A	G	G	A	C	T	T	G	A	A	A	G	A	G	C	C	A	C
61	Delta	>137509|29659|29887	C	A	A	T	C	T	T	T	A	A	T	C	A	G	T	G	T	G	T	A	A	C	A	T	T	A	G	G	G	A	G	G	A	C	T	T	G	A	A	A	G	A	G	C	C	A	C
62	Delta	>137488|29659|29887	C	A	A	T	C	T	T	T	A	A	T	C	A	G	T	G	T	G	T	A	A	C	A	T	T	A	G	G	G	A	G	G	A	C	T	T	G	A	A	A	G	A	G	C	C	A	C
63	Delta	>134813|29673|29901	C	A	A	T	C	T	T	T	A	A	T	C	A	G	T	G	T	G	T	A	A	C	A	T	T	A	G	G	G	A	G	G	A	C	T	T	G	A	A	A	G	A	G	C	C	A	C
64	Delta	>134762|29662|29890	C	A	A	T	C	T	T	T	A	A	T	C	A	G	T	G	T	G	T	A	A	C	A	T	T	A	G	G	G	A	G	G	A	C	T	T	G	A	A	A	G	A	G	C	C	A	C
65	Delta	>134743|29659|29887	C	A	A	T	C	T	T	T	A	A	T	C	A	G	T	G	T	G	T	A	A	C	A	T	T	A	G	G	G	A	G	G	A	C	T	T	G	A	A	A	G	A	G	C	C	A	C
66	Delta	>134716|29662|29890	C	A	A	T	C	T	T	T	A	A	T	C	A	G	T	G	T	G	T	A	A	C	A	T	T	A	G	G	G	A	G	G	A	C	T	T	G	A	A	A	G	A	G	C	C	A	C
67	Delta	>134709|29668|29896	C	A	A	T	C	T	T	T	A	A	T	C	A	G	T	G	T	G	T	A	A	C	A	T	T	A	G	G	G	A	G	G	A	C	T	T	G	A	A	A	G	A	G	C	C	A	C
68	Delta	>134587|29573|29801	C	A	A	T	C	T	T	T	A	A	T	C	A	G	T	G	T	G	T	A	A	C	A	T	T	A	G	G	G	A	G	G	A	C	T	T	G	A	A	A	G	A	G	C	C	A	C
69	Delta	>125196|29572|29800	C	A	A	T	C	T	T	T	A	A	T	C	A	G	T	G	T	G	T	A	A	C	A	T	T	A	G	G	G	A	G	G	A	C	T	T	G	A	A	A	G	A	G	C	C	A	C
70	Delta	>125148|29670|29898	C	A	A	T	C	T	T	T	A	A	T	C	A	G	T	G	T	G	T	A	A	C	A	T	T	A	G	G	G	A	G	G	A	C	T	T	G	A	A	A	G	A	G	C	C	A	C
71	Delta	>125121|29653|29881	C	A	A	T	C	T	T	T	A	A	T	C	A	G	T	G	T	G	T	A	A	C	A	T	T	A	G	G	G	A	G	G	A	C	T	T	G	A	A	A	G	A	G	C	C	A	C
72	Delta	>125117|29662|29890	C	A	A	T	C	T	T	T	A	A	T	C	A	G	T	G	T	G	T	A	A	C	A	T	T	A	G	G	G	A	G	G	A	C	T	T	G	A	A	A	G	A	G	C	C	A	C
73	Delta	>125108|29668|29896	C	A	A	T	C	T	T	T	A	A	T	C	A	G	T	G	T	G	T	A	A	C	A	T	T	A	G	G	G	A	G	G	A	C	T	T	G	A	A	A	G	A	G	C	C	A	C
74	Delta	>125095|29662|29890	C	A	A	T	C	T	T	T	A	A	T	C	A	G	T	G	T	G	T	A	A	C	A	T	T	A	G	G	G	A	G	G	A	C	T	T	G	A	A	A	G	A	G	C	C	A	C
75	Delta	>125074|29675|29903	C	A	A	T	C	T	T	T	A	A	T	C	A	G	T	G	T	G	T	A	A	C	A	T	T	A	G	G	G	A	G	G	A	C	T	T	G	A	A	A	G	A	G	C	C	A	C
76	Delta	>125067|29662|29890	C	A	A	T	C	T	T	T	A	A	T	C	A	G	T	G	T	G	T	A	A	C	A	T	T	A	G	G	G	A	G	G	A	C	T	T	G	A	A	A	G	A	G	C	C	A	C
77	Delta	>125066|29662|29890	C	A	A	T	C	T	T	T	A	A	T	C	A	G	T	G	T	G	T	A	A	C	A	T	T	A	G	G	G	A	G	G	A	C	T	T	G	A	A	A	G	A	G	C	C	A	C
78	Delta	>115503|29662|29890	C	A	A	T	C	T	T	T	A	A	T	C	A	G	T	G	T	G	T	A	A	C	A	T	T	A	G	G	G	A	G	G	A	C	T	T	G	A	A	A	G	A	G	C	C	A	C
79	Delta	>115497|29662|29890	C	A	A	T	C	T	T	T	A	A	T	C	A	G	T	G	T	G	T	A	A	C	A	T	T	A	G	G	G	A	G	G	A	C	T	T	G	A	A	A	G	A	G	C	C	A	C
80	Delta	>105823|29662|29890	C	A	A	T	C	T	T	T	A	A	T	C	A	G	T	G	T	G	T	A	A	C	A	T	T	A	G	G	G	A	G	G	A	C	T	T	G	A	A	A	G	A	G	C	C	A	C
81	Delta	>105820|29662|29890	C	A	A	T	C	T	T	T	A	A	T	C	A	G	T	G	T	G	T	A	A	C	A	T	T	A	G	G	G	A	G	G	A	C	T	T	G	A	A	A	G	A	G	C	C	A	C
82	Delta	>105807|29653|29881	C	A	A	T	C	T	T	T	A	A	T	C	A	G	T	G	T	G	T	A	A	C	A	T	T	A	G	G	G	A	G	G	A	C	T	T	G	A	A	A	G	A	G	C	C	A	C
83	Delta	>105788|29662|29890	C	A	A	T	C	T	T	T	A	A	T	C	A	G	T	G	T	G	T	A	A	C	A	T	T	A	G	G	G	A	G	G	A	C	T	T	G	A	A	A	G	A	G	C	C	A	C
84	Delta	>105775|29662|29890	C	A	A	T	C	T	T	T	A	A	T	C	A	G	T	G	T	G	T	A	A	C	A	T	T	A	G	G	G	A	G	G	A	C	T	T	G	A	A	A	G	A	G	C	C	A	C
85	Delta	>96106|29662|29890	C	A	A	T	C	T	T	T	A	A	T	C	A	G	T	G	T	G	T	A	A	C	A	T	T	A	G	G	G	A	G	G	A	C	T	T	G	A	A	A	G	A	G	C	C	A	C
86	Delta	>96078|29662|29890	C	A	A	T	C	T	T	T	A	A	T	C	A	G	T	G	T	G	T	A	A	C	A	T	T	A	G	G	G	A	G	G	A	C	T	T	G	A	A	A	G	A	G	C	C	A	C
87	Delta	>96076|29662|29890	C	A	A	T	C	T	T	T	A	A	T	C	A	G	T	G	T	G	T	A	A	C	A	T	T	A	G	G	G	A	G	G	A	C	T	T	G	A	A	A	G	A	G	C	C	A	C
88	Delta	>96074|29662|29890	C	A	A	T	C	T	T	T	A	A	T	C	A	G	T	G	T	G	T	A	A	C	A	T	T	A	G	G	G	A	G	G	A	C	T	T	G	A	A	A	G	A	G	C	C	A	C
89	Delta	>96072|29668|29896	C	A	A	T	C	T	T	T	A	A	T	C	A	G	T	G	T	G	T	A	A	C	A	T	T	A	G	G	G	A	G	G	A	C	T	T	G	A	A	A	G	A	G	C	C	A	C
90	Delta	>96063|29647|29875	C	A	A	T	C	T	T	T	A	A	T	C	A	G	T	G	T	G	T	A	A	C	A	T	T	A	G	G	G	A	G	G	A	C	T	T	G	A	A	A	G	A	G	C	C	A	C
91	Delta	>95853|29662|29890	C	A	A	T	C	T	T	T	A	A	T	C	A	G	T	G	T	G	T	A	A	C	A	T	T	A	G	G	G	A	G	G	A	C	T	T	G	A	A	A	G	A	G	C	C	A	C
92	Delta	>95602|29662|29890	C	A	A	T	C	T	T	T	A	A	T	C	A	G	T	G	T	G	T	A	A	C	A	T	T	A	G	G	G	A	G	G	A	C	T	T	G	A	A	A	G	A	G	C	C	A	C
93	Delta	>95565|29639|29867	C	A	A	T	C	T	T	T	A	A	T	C	A	G	T	G	T	G	T	A	A	C	A	T	T	A	G	G	G	A	G	G	A	C	T	T	G	A	A	A	G	A	G	C	C	A	C
94	Delta	>86795|29691|29919	C	A	A	T	C	T	T	T	A	A	T	C	A	G	T	G	T	G	T	A	A	C	A	T	T	A	G	G	G	A	G	G	A	C	T	T	G	A	A	A	G	A	G	C	C	A	C
95	Delta	>86794|29691|29919	C	A	A	T	C	T	T	T	A	A	T	C	A	G	T	G	T	G	T	A	A	C	A	T	T	A	G	G	G	A	G	G	A	C	T	T	G	A	A	A	G	A	G	C	C	A	C
96	Delta	>86788|29681|29909	C	A	A	T	C	T	T	T	A	A	T	C	A	G	T	G	T	G	T	A	A	C	A	T	T	A	G	G	G	A	G	G	A	C	T	T	G	A	A	A	G	A	G	C	C	A	C
97	Delta	>86783|29663|29891	C	A	A	T	C	T	T	T	A	A	T	C	A	G	T	G	T	G	T	A	A	C	A	T	T	A	G	G	G	A	G	G	A	C	T	T	G	A	A	A	G	A	G	C	C	A	C
98	Delta	>86773|29591|29819	C	A	A	T	C	T	T	T	A	A	T	C	A	G	T	G	T	G	T	A	A	C	A	T	T	A	G	G	G	A	G	G	A	C	T	T	G	A	A	A	G	A	G	C	C	A	C
99	Delta	>86767|29655|29883	C	A	A	T	C	T	T	T	A	A	T	C	A	G	T	G	T	G	T	A	A	C	A	T	T	A	G	G	G	A	G	G	A	C	T	T	G	A	A	A	G	A	G	C	C	A	C
100	Delta	>86762|29649|29877	C	A	A	T	C	T	T	T	A	A	T	C	A	G	T	G	T	G	T	A	A	C	A	T	T	A	G	G	G	A	G	G	A	C	T	T	G	A	A	A	G	A	G	C	C	A	C
101	Delta	>86727|29662|29890	C	A	A	T	C	T	T	T	A	A	T	C	A	G	T	G	T	G	T	A	A	C	A	T	T	A	G	G	G	A	G	G	A	C	T	T	G	A	A	A	G	A	G	C	C	A	C
102	Delta	>86720|29662|29890	C	A	A	T	C	T	T	T	A	A	T	C	A	G	T	G	T	G	T	A	A	C	A	T	T	A	G	G	G	A	G	G	A	C	T	T	G	A	A	A	G	A	G	C	C	A	C
103	Delta	>86713|29662|29890	C	A	A	T	C	T	T	T	A	A	T	C	A	G	T	G	T	G	T	A	A	C	A	T	T	A	G	G	G	A	G	G	A	C	T	T	G	A	A	A	G	A	G	C	C	A	C
104	Delta	>86712|29668|29896	C	A	A	T	C	T	T	T	A	A	T	C	A	G	T	G	T	G	T	A	A	C	A	T	T	A	G	G	G	A	G	G	A	C	T	T	G	A	A	A	G	A	G	C	C	A	C
105	Delta	>86705|29662|29890	C	A	A	T	C	T	T	T	A	A	T	C	A	G	T	G	T	G	T	A	A	C	A	T	T	A	G	G	G	A	G	G	A	C	T	T	G	A	A	A	G	A	G	C	C	A	C
106	Delta	>86694|29662|29890	C	A	A	T	C	T	T	T	A	A	T	C	A	G	T	G	T	G	T	A	A	C	A	T	T	A	G	G	G	A	G	G	A	C	T	T	G	A	A	A	G	A	G	C	C	A	C
107	Delta	>86673|29662|29890	C	A	A	T	C	T	T	T	A	A	T	C	A	G	T	G	T	G	T	A	A	C	A	T	T	A	G	G	G	A	G	G	A	C	T	T	G	A	A	A	G	A	G	C	C	A	C
108	Delta	>86611|29662|29890	C	A	A	T	C	T	T	T	A	A	T	C	A	G	T	G	T	G	T	A	A	C	A	T	T	A	G	G	G	A	G	G	A	C	T	T	G	A	A	A	G	A	G	C	C	A	C
109	Delta	>86607|29668|29896	C	A	A	T	C	T	T	T	A	A	T	C	A	G	T	G	T	G	T	A	A	C	A	T	T	A	G	G	G	A	G	G	A	C	T	T	G	A	A	A	G	A	G	C	C	A	C
110	Delta	>86602|29662|29890	C	A	A	T	C	T	T	T	A	A	T	C	A	G	T	G	T	G	T	A	A	C	A	T	T	A	G	G	G	A	G	G	A	C	T	T	G	A	A	A	G	A	G	C	C	A	C
111	Delta	>86593|29662|29890	C	A	A	T	C	T	T	T	A	A	T	C	A	G	T	G	T	G	T	A	A	C	A	T	T	A	G	G	G	A	G	G	A	C	T	T	G	A	A	A	G	A	G	C	C	A	C
112	Delta	>86567|29662|29890	C	A	A	T	C	T	T	T	A	A	T	C	A	G	T	G	T	G	T	A	A	C	A	T	T	A	G	G	G	A	G	G	A	C	T	T	G	A	A	A	G	A	G	C	C	A	C
113	Delta	>86515|29662|29890	C	A	A	T	C	T	T	T	A	A	T	C	A	G	T	G	T	G	T	A	A	C	A	T	T	A	G	G	G	A	G	G	A	C	T	T	G	A	A	A	G	A	G	C	C	A	C
114	Delta	>86476|29662|29890	C	A	A	T	C	T	T	T	A	A	T	C	A	G	T	G	T	G	T	A	A	C	A	T	T	A	G	G	G	A	G	G	A	C	T	T	G	A	A	A	G	A	G	C	C	A	C
115	Delta	>86460|29662|29890	C	A	A	T	C	T	T	T	A	A	T	C	A	G	T	G	T	G	T	A	A	C	A	T	T	A	G	G	G	A	G	G	A	C	T	T	G	A	A	A	G	A	G	C	C	A	C
116	Delta	>86343|29573|29801	C	A	A	T	C	T	T	T	A	A	T	C	A	G	T	G	T	G	T	A	A	C	A	T	T	A	G	G	G	A	G	G	A	C	T	T	G	A	A	A	G	A	G	C	C	A	C
117	Delta	>76884|29676|29904	C	A	A	T	C	T	T	T	A	A	T	C	A	G	T	G	T	G	T	A	A	C	A	T	T	A	G	G	G	A	G	G	A	C	T	T	G	A	A	A	G	A	G	C	C	A	C
118	Delta	>76881|29669|29897	C	A	A	T	C	T	T	T	A	A	T	C	A	G	T	G	T	G	T	A	A	C	A	T	T	A	G	G	G	A	G	G	A	C	T	T	G	A	A	A	G	A	G	C	C	A	C
119	Delta	>76841|29662|29890	C	A	A	T	C	T	T	T	A	A	T	C	A	G	T	G	T	G	T	A	A	C	A	T	T	A	G	G	G	A	G	G	A	C	T	T	G	A	A	A	G	A	G	C	C	A	C
120	Delta	>76834|29662|29890	C	A	A	T	C	T	T	T	A	A	T	C	A	G	T	G	T	G	T	A	A	C	A	T	T	A	G	G	G	A	G	G	A	C	T	T	G	A	A	A	G	A	G	C	C	A	C
121	Delta	>76831|29662|29890	C	A	A	T	C	T	T	T	A	A	T	C	A	G	T	G	T	G	T	A	A	C	A	T	T	A	G	G	G	A	G	G	A	C	T	T	G	A	A	A	G	A	G	C	C	A	C
122	Delta	>76812|29668|29896	C	A	A	T	C	T	T	T	A	A	T	C	A	G	T	G	T	G	T	A	A	C	A	T	T	A	G	G	G	A	G	G	A	C	T	T	G	A	A	A	G	A	G	C	C	A	C
123	Delta	>76804|29662|29890	C	A	A	T	C	T	T	T	A	A	T	C	A	G	T	G	T	G	T	A	A	C	A	T	T	A	G	G	G	A	G	G	A	C	T	T	G	A	A	A	G	A	G	C	C	A	C
124	Delta	>76798|29668|29896	C	A	A	T	C	T	T	T	A	A	T	C	A	G	T	G	T	G	T	A	A	C	A	T	T	A	G	G	G	A	G	G	A	C	T	T	G	A	A	A	G	A	G	C	C	A	C
125	Delta	>76753|29668|29896	C	A	A	T	C	T	T	T	A	A	T	C	A	G	T	G	T	G	T	A	A	C	A	T	T	A	G	G	G	A	G	G	A	C	T	T	G	A	A	A	G	A	G	C	C	A	C
126	Delta	>76750|29662|29890	C	A	A	T	C	T	T	T	A	A	T	C	A	G	T	G	T	G	T	A	A	C	A	T	T	A	G	G	G	A	G	G	A	C	T	T	G	A	A	A	G	A	G	C	C	A	C
127	Delta	>76668|29662|29890	C	A	A	T	C	T	T	T	A	A	T	C	A	G	T	G	T	G	T	A	A	C	A	T	T	A	G	G	G	A	G	G	A	C	T	T	G	A	A	A	G	A	G	C	C	A	C
128	Delta	>76657|29662|29890	C	A	A	T	C	T	T	T	A	A	T	C	A	G	T	G	T	G	T	A	A	C	A	T	T	A	G	G	G	A	G	G	A	C	T	T	G	A	A	A	G	A	G	C	C	A	C
129	Delta	>76630|29662|29890	C	A	A	T	C	T	T	T	A	A	T	C	A	G	T	G	T	G	T	A	A	C	A	T	T	A	G	G	G	A	G	G	A	C	T	T	G	A	A	A	G	A	G	C	C	A	C
130	Delta	>76589|29662|29890	C	A	A	T	C	T	T	T	A	A	T	C	A	G	T	G	T	G	T	A	A	C	A	T	T	A	G	G	G	A	G	G	A	C	T	T	G	A	A	A	G	A	G	C	C	A	C
131	Delta	>76560|29662|29890	C	A	A	T	C	T	T	T	A	A	T	C	A	G	T	G	T	G	T	A	A	C	A	T	T	A	G	G	G	A	G	G	A	C	T	T	G	A	A	A	G	A	G	C	C	A	C
132	Delta	>76559|29662|29890	C	A	A	T	C	T	T	T	A	A	T	C	A	G	T	G	T	G	T	A	A	C	A	T	T	A	G	G	G	A	G	G	A	C	T	T	G	A	A	A	G	A	G	C	C	A	C
133	Delta	>76113|29573|29801	C	A	A	T	C	T	T	T	A	A	T	C	A	G	T	G	T	G	T	A	A	C	A	T	T	A	G	G	G	A	G	G	A	C	T	T	G	A	A	A	G	A	G	C	C	A	C
134	Delta	>76112|29573|29801	C	A	A	T	C	T	T	T	A	A	T	C	A	G	T	G	T	G	T	A	A	C	A	T	T	A	G	G	G	A	G	G	A	C	T	T	G	A	A	A	G	A	G	C	C	A	C
135	Delta	>76110|29573|29801	C	A	A	T	C	T	T	T	A	A	T	C	A	G	T	G	T	G	T	A	A	C	A	T	T	A	G	G	G	A	G	G	A	C	T	T	G	A	A	A	G	A	G	C	C	A	C
136	Delta	>67019|29646|29874	C	A	A	T	C	T	T	T	A	A	T	C	A	G	T	G	T	G	T	A	A	C	A	T	T	A	G	G	G	A	G	G	A	C	T	T	G	A	A	A	G	A	G	C	C	A	C
137	Delta	>66998|29662|29890	C	A	A	T	C	T	T	T	A	A	T	C	A	G	T	G	T	G	T	A	A	C	A	T	T	A	G	G	G	A	G	G	A	C	T	T	G	A	A	A	G	A	G	C	C	A	C
138	Delta	>66987|29662|29890	C	A	A	T	C	T	T	T	A	A	T	C	A	G	T	G	T	G	T	A	A	C	A	T	T	A	G	G	G	A	G	G	A	C	T	T	G	A	A	A	G	A	G	C	C	A	C
139	Delta	>66977|29662|29890	C	A	A	T	C	T	T	T	A	A	T	C	A	G	T	G	T	G	T	A	A	C	A	T	T	A	G	G	G	A	G	G	A	C	T	T	G	A	A	A	G	A	G	C	C	A	C
140	Delta	>66974|29662|29890	C	A	A	T	C	T	T	T	A	A	T	C	A	G	T	G	T	G	T	A	A	C	A	T	T	A	G	G	G	A	G	G	A	C	T	T	G	A	A	A	G	A	G	C	C	A	C
141	Delta	>66971|29662|29890	C	A	A	T	C	T	T	T	A	A	T	C	A	G	T	G	T	G	T	A	A	C	A	T	T	A	G	G	G	A	G	G	A	C	T	T	G	A	A	A	G	A	G	C	C	A	C
142	Delta	>66970|29662|29890	C	A	A	T	C	T	T	T	A	A	T	C	A	G	T	G	T	G	T	A	A	C	A	T	T	A	G	G	G	A	G	G	A	C	T	T	G	A	A	A	G	A	G	C	C	A	C
143	Delta	>66968|29662|29890	C	A	A	T	C	T	T	T	A	A	T	C	A	G	T	G	T	G	T	A	A	C	A	T	T	A	G	G	G	A	G	G	A	C	T	T	G	A	A	A	G	A	G	C	C	A	C
144	Delta	>66964|29662|29890	C	A	A	T	C	T	T	T	A	A	T	C	A	G	T	G	T	G	T	A	A	C	A	T	T	A	G	G	G	A	G	G	A	C	T	T	G	A	A	A	G	A	G	C	C	A	C
145	Delta	>66950|29662|29890	C	A	A	T	C	T	T	T	A	A	T	C	A	G	T	G	T	G	T	A	A	C	A	T	T	A	G	G	G	A	G	G	A	C	T	T	G	A	A	A	G	A	G	C	C	A	C
146	Delta	>66948|29662|29890	C	A	A	T	C	T	T	T	A	A	T	C	A	G	T	G	T	G	T	A	A	C	A	T	T	A	G	G	G	A	G	G	A	C	T	T	G	A	A	A	G	A	G	C	C	A	C
147	Delta	>66936|29662|29890	C	A	A	T	C	T	T	T	A	A	T	C	A	G	T	G	T	G	T	A	A	C	A	T	T	A	G	G	G	A	G	G	A	C	T	T	G	A	A	A	G	A	G	C	C	A	C
148	Delta	>66927|29662|29890	C	A	A	T	C	T	T	T	A	A	T	C	A	G	T	G	T	G	T	A	A	C	A	T	T	A	G	G	G	A	G	G	A	C	T	T	G	A	A	A	G	A	G	C	C	A	C
149	Delta	>66924|29668|29896	C	A	A	T	C	T	T	T	A	A	T	C	A	G	T	G	T	G	T	A	A	C	A	T	T	A	G	G	G	A	G	G	A	C	T	T	G	A	A	A	G	A	G	C	C	A	C
150	Delta	>66907|29662|29890	C	A	A	T	C	T	T	T	A	A	T	C	A	G	T	G	T	G	T	A	A	C	A	T	T	A	G	G	G	A	G	G	A	C	T	T	G	A	A	A	G	A	G	C	C	A	C
151	Delta	>66892|29662|29890	C	A	A	T	C	T	T	T	A	A	T	C	A	G	T	G	T	G	T	A	A	C	A	T	T	A	G	G	G	A	G	G	A	C	T	T	G	A	A	A	G	A	G	C	C	A	C
152	Delta	>66886|29657|29885	C	A	A	T	C	T	T	T	A	A	T	C	A	G	T	G	T	G	T	A	A	C	A	T	T	A	G	G	G	A	G	G	A	C	T	T	G	A	A	A	G	A	G	C	C	A	C
153	Delta	>66866|29662|29890	C	A	A	T	C	T	T	T	A	A	T	C	A	G	T	G	T	G	T	A	A	C	A	T	T	A	G	G	G	A	G	G	A	C	T	T	G	A	A	A	G	A	G	C	C	A	C
154	Delta	>66852|29662|29890	C	A	A	T	C	T	T	T	A	A	T	C	A	G	T	G	T	G	T	A	A	C	A	T	T	A	G	G	G	A	G	G	A	C	T	T	G	A	A	A	G	A	G	C	C	A	C
155	Delta	>66844|29662|29890	C	A	A	T	C	T	T	T	A	A	T	C	A	G	T	G	T	G	T	A	A	C	A	T	T	A	G	G	G	A	G	G	A	C	T	T	G	A	A	A	G	A	G	C	C	A	C
156	Delta	>66831|29662|29890	C	A	A	T	C	T	T	T	A	A	T	C	A	G	T	G	T	G	T	A	A	C	A	T	T	A	G	G	G	A	G	G	A	C	T	T	G	A	A	A	G	A	G	C	C	A	C
157	Delta	>66830|29662|29890	C	A	A	T	C	T	T	T	A	A	T	C	A	G	T	G	T	G	T	A	A	C	A	T	T	A	G	G	G	A	G	G	A	C	T	T	G	A	A	A	G	A	G	C	C	A	C
158	Delta	>66822|29662|29890	C	A	A	T	C	T	T	T	A	A	T	C	A	G	T	G	T	G	T	A	A	C	A	T	T	A	G	G	G	A	G	G	A	C	T	T	G	A	A	A	G	A	G	C	C	A	C
159	Delta	>66821|29662|29890	C	A	A	T	C	T	T	T	A	A	T	C	A	G	T	G	T	G	T	A	A	C	A	T	T	A	G	G	G	A	G	G	A	C	T	T	G	A	A	A	G	A	G	C	C	A	C
160	Delta	>66806|29662|29890	C	A	A	T	C	T	T	T	A	A	T	C	A	G	T	G	T	G	T	A	A	C	A	T	T	A	G	G	G	A	G	G	A	C	T	T	G	A	A	A	G	A	G	C	C	A	C
161	Delta	>66801|29662|29890	C	A	A	T	C	T	T	T	A	A	T	C	A	G	T	G	T	G	T	A	A	C	A	T	T	A	G	G	G	A	G	G	A	C	T	T	G	A	A	A	G	A	G	C	C	A	C
162	Delta	>66786|29669|29897	C	A	A	T	C	T	T	T	A	A	T	C	A	G	T	G	T	G	T	A	A	C	A	T	T	A	G	G	G	A	G	G	A	C	T	T	G	A	A	A	G	A	G	C	C	A	C
163	Delta	>66777|29662|29890	C	A	A	T	C	T	T	T	A	A	T	C	A	G	T	G	T	G	T	A	A	C	A	T	T	A	G	G	G	A	G	G	A	C	T	T	G	A	A	A	G	A	G	C	C	A	C
164	Delta	>66762|29653|29881	C	A	A	T	C	T	T	T	A	A	T	C	A	G	T	G	T	G	T	A	A	C	A	T	T	A	G	G	G	A	G	G	A	C	T	T	G	A	A	A	G	A	G	C	C	A	C
165	Delta	>66733|29662|29890	C	A	A	T	C	T	T	T	A	A	T	C	A	G	T	G	T	G	T	A	A	C	A	T	T	A	G	G	G	A	G	G	A	C	T	T	G	A	A	A	G	A	G	C	C	A	C
166	Delta	>66731|29662|29890	C	A	A	T	C	T	T	T	A	A	T	C	A	G	T	G	T	G	T	A	A	C	A	T	T	A	G	G	G	A	G	G	A	C	T	T	G	A	A	A	G	A	G	C	C	A	C
167	Delta	>66724|29662|29890	C	A	A	T	C	T	T	T	A	A	T	C	A	G	T	G	T	G	T	A	A	C	A	T	T	A	G	G	G	A	G	G	A	C	T	T	G	A	A	A	G	A	G	C	C	A	C
168	Delta	>66723|29656|29884	C	A	A	T	C	T	T	T	A	A	T	C	A	G	T	G	T	G	T	A	A	C	A	T	T	A	G	G	G	A	G	G	A	C	T	T	G	A	A	A	G	A	G	C	C	A	C
169	Delta	>66710|29662|29890	C	A	A	T	C	T	T	T	A	A	T	C	A	G	T	G	T	G	T	A	A	C	A	T	T	A	G	G	G	A	G	G	A	C	T	T	G	A	A	A	G	A	G	C	C	A	C
170	Delta	>66700|29662|29890	C	A	A	T	C	T	T	T	A	A	T	C	A	G	T	G	T	G	T	A	A	C	A	T	T	A	G	G	G	A	G	G	A	C	T	T	G	A	A	A	G	A	G	C	C	A	C
171	Delta	>66687|29662|29890	C	A	A	T	C	T	T	T	A	A	T	C	A	G	T	G	T	G	T	A	A	C	A	T	T	A	G	G	G	A	G	G	A	C	T	T	G	A	A	A	G	A	G	C	C	A	C
172	Delta	>66683|29662|29890	C	A	A	T	C	T	T	T	A	A	T	C	A	G	T	G	T	G	T	A	A	C	A	T	T	A	G	G	G	A	G	G	A	C	T	T	G	A	A	A	G	A	G	C	C	A	C
173	Delta	>66682|29662|29890	C	A	A	T	C	T	T	T	A	A	T	C	A	G	T	G	T	G	T	A	A	C	A	T	T	A	G	G	G	A	G	G	A	C	T	T	G	A	A	A	G	A	G	C	C	A	C
174	Delta	>66652|29662|29890	C	A	A	T	C	T	T	T	A	A	T	C	A	G	T	G	T	G	T	A	A	C	A	T	T	A	G	G	G	A	G	G	A	C	T	T	G	A	A	A	G	A	G	C	C	A	C
175	Delta	>66085|29662|29890	C	A	A	T	C	T	T	T	A	A	T	C	A	G	T	G	T	G	T	A	A	C	A	T	T	A	G	G	G	A	G	G	A	C	T	T	G	A	A	A	G	A	G	C	C	A	C
176	Delta	>66072|29662|29890	C	A	A	T	C	T	T	T	A	A	T	C	A	G	T	G	T	G	T	A	A	C	A	T	T	A	G	G	G	A	G	G	A	C	T	T	G	A	A	A	G	A	G	C	C	A	C
177	Delta	>66069|29662|29890	C	A	A	T	C	T	T	T	A	A	T	C	A	G	T	G	T	G	T	A	A	C	A	T	T	A	G	G	G	A	G	G	A	C	T	T	G	A	A	A	G	A	G	C	C	A	C
178	Delta	>66067|29662|29890	C	A	A	T	C	T	T	T	A	A	T	C	A	G	T	G	T	G	T	A	A	C	A	T	T	A	G	G	G	A	G	G	A	C	T	T	G	A	A	A	G	A	G	C	C	A	C
179	Delta	>65963|29662|29890	C	A	A	T	C	T	T	T	A	A	T	C	A	G	T	G	T	G	T	A	A	C	A	T	T	A	G	G	G	A	G	G	A	C	T	T	G	A	A	A	G	A	G	C	C	A	C
180	Delta	>65561|29662|29890	C	A	A	T	C	T	T	T	A	A	T	C	A	G	T	G	T	G	T	A	A	C	A	T	T	A	G	G	G	A	G	G	A	C	T	T	G	A	A	A	G	A	G	C	C	A	C
181	Delta	>65560|29662|29890	C	A	A	T	C	T	T	T	A	A	T	C	A	G	T	G	T	G	T	A	A	C	A	T	T	A	G	G	G	A	G	G	A	C	T	T	G	A	A	A	G	A	G	C	C	A	C
182	Delta	>65542|29662|29890	C	A	A	T	C	T	T	T	A	A	T	C	A	G	T	G	T	G	T	A	A	C	A	T	T	A	G	G	G	A	G	G	A	C	T	T	G	A	A	A	G	A	G	C	C	A	C
183	Delta	>57097|29662|29890	C	A	A	T	C	T	T	T	A	A	T	C	A	G	T	G	T	G	T	A	A	C	A	T	T	A	G	G	G	A	G	G	A	C	T	T	G	A	A	A	G	A	G	C	C	A	C
184	Delta	>57088|29662|29890	C	A	A	T	C	T	T	T	A	A	T	C	A	G	T	G	T	G	T	A	A	C	A	T	T	A	G	G	G	A	G	G	A	C	T	T	G	A	A	A	G	A	G	C	C	A	C
185	Delta	>57085|29662|29890	C	A	A	T	C	T	T	T	A	A	T	C	A	G	T	G	T	G	T	A	A	C	A	T	T	A	G	G	G	A	G	G	A	C	T	T	G	A	A	A	G	A	G	C	C	A	C
186	Delta	>57061|29662|29890	C	A	A	T	C	T	T	T	A	A	T	C	A	G	T	G	T	G	T	A	A	C	A	T	T	A	G	G	G	A	G	G	A	C	T	T	G	A	A	A	G	A	G	C	C	A	C
187	Delta	>57045|29662|29890	C	A	A	T	C	T	T	T	A	A	T	C	A	G	T	G	T	G	T	A	A	C	A	T	T	A	G	G	G	A	G	G	A	C	T	T	G	A	A	A	G	A	G	C	C	A	C
188	Delta	>57040|29662|29890	C	A	A	T	C	T	T	T	A	A	T	C	A	G	T	G	T	G	T	A	A	C	A	T	T	A	G	G	G	A	G	G	A	C	T	T	G	A	A	A	G	A	G	C	C	A	C
189	Delta	>57033|29662|29890	C	A	A	T	C	T	T	T	A	A	T	C	A	G	T	G	T	G	T	A	A	C	A	T	T	A	G	G	G	A	G	G	A	C	T	T	G	A	A	A	G	A	G	C	C	A	C
190	Delta	>57019|29662|29890	C	A	A	T	C	T	T	T	A	A	T	C	A	G	T	G	T	G	T	A	A	C	A	T	T	A	G	G	G	A	G	G	A	C	T	T	G	A	A	A	G	A	G	C	C	A	C
191	Delta	>57013|29662|29890	C	A	A	T	C	T	T	T	A	A	T	C	A	G	T	G	T	G	T	A	A	C	A	T	T	A	G	G	G	A	G	G	A	C	T	T	G	A	A	A	G	A	G	C	C	A	C
192	Delta	>57008|29662|29890	C	A	A	T	C	T	T	T	A	A	T	C	A	G	T	G	T	G	T	A	A	C	A	T	T	A	G	G	G	A	G	G	A	C	T	T	G	A	A	A	G	A	G	C	C	A	C
193	Delta	>56980|29662|29890	C	A	A	T	C	T	T	T	A	A	T	C	A	G	T	G	T	G	T	A	A	C	A	T	T	A	G	G	G	A	G	G	A	C	T	T	G	A	A	A	G	A	G	C	C	A	C
194	Delta	>56964|29662|29890	C	A	A	T	C	T	T	T	A	A	T	C	A	G	T	G	T	G	T	A	A	C	A	T	T	A	G	G	G	A	G	G	A	C	T	T	G	A	A	A	G	A	G	C	C	A	C
195	Delta	>56962|29662|29890	C	A	A	T	C	T	T	T	A	A	T	C	A	G	T	G	T	G	T	A	A	C	A	T	T	A	G	G	G	A	G	G	A	C	T	T	G	A	A	A	G	A	G	C	C	A	C
196	Delta	>56952|29662|29890	C	A	A	T	C	T	T	T	A	A	T	C	A	G	T	G	T	G	T	A	A	C	A	T	T	A	G	G	G	A	G	G	A	C	T	T	G	A	A	A	G	A	G	C	C	A	C
197	Delta	>56869|29662|29890	C	A	A	T	C	T	T	T	A	A	T	C	A	G	T	G	T	G	T	A	A	C	A	T	T	A	G	G	G	A	G	G	A	C	T	T	G	A	A	A	G	A	G	C	C	A	C
198	Delta	>56868|29662|29890	C	A	A	T	C	T	T	T	A	A	T	C	A	G	T	G	T	G	T	A	A	C	A	T	T	A	G	G	G	A	G	G	A	C	T	T	G	A	A	A	G	A	G	C	C	A	C
199	Delta	>56862|29662|29890	C	A	A	T	C	T	T	T	A	A	T	C	A	G	T	G	T	G	T	A	A	C	A	T	T	A	G	G	G	A	G	G	A	C	T	T	G	A	A	A	G	A	G	C	C	A	C
200	Delta	>56858|29662|29890	C	A	A	T	C	T	T	T	A	A	T	C	A	G	T	G	T	G	T	A	A	C	A	T	T	A	G	G	G	A	G	G	A	C	T	T	G	A	A	A	G	A	G	C	C	A	C
201	Delta	>56854|29662|29890	C	A	A	T	C	T	T	T	A	A	T	C	A	G	T	G	T	G	T	A	A	C	A	T	T	A	G	G	G	A	G	G	A	C	T	T	G	A	A	A	G	A	G	C	C	A	C
202	Delta	>56853|29668|29896	C	A	A	T	C	T	T	T	A	A	T	C	A	G	T	G	T	G	T	A	A	C	A	T	T	A	G	G	G	A	G	G	A	C	T	T	G	A	A	A	G	A	G	C	C	A	C
203	Delta	>56848|29662|29890	C	A	A	T	C	T	T	T	A	A	T	C	A	G	T	G	T	G	T	A	A	C	A	T	T	A	G	G	G	A	G	G	A	C	T	T	G	A	A	A	G	A	G	C	C	A	C
204	Delta	>56118|29662|29890	C	A	A	T	C	T	T	T	A	A	T	C	A	G	T	G	T	G	T	A	A	C	A	T	T	A	G	G	G	A	G	G	A	C	T	T	G	A	A	A	G	A	G	C	C	A	C
205	Delta	>56116|29662|29890	C	A	A	T	C	T	T	T	A	A	T	C	A	G	T	G	T	G	T	A	A	C	A	T	T	A	G	G	G	A	G	G	A	C	T	T	G	A	A	A	G	A	G	C	C	A	C
206	Delta	>55987|29662|29890	C	A	A	T	C	T	T	T	A	A	T	C	A	G	T	G	T	G	T	A	A	C	A	T	T	A	G	G	G	A	G	G	A	C	T	T	G	A	A	A	G	A	G	C	C	A	C
207	Delta	>55567|29662|29890	C	A	A	T	C	T	T	T	A	A	T	C	A	G	T	G	T	G	T	A	A	C	A	T	T	A	G	G	G	A	G	G	A	C	T	T	G	A	A	A	G	A	G	C	C	A	C
208	Delta	>55559|29662|29890	C	A	A	T	C	T	T	T	A	A	T	C	A	G	T	G	T	G	T	A	A	C	A	T	T	A	G	G	G	A	G	G	A	C	T	T	G	A	A	A	G	A	G	C	C	A	C
209	Delta	>47107|29662|29890	C	A	A	T	C	T	T	T	A	A	T	C	A	G	T	G	T	G	T	A	A	C	A	T	T	A	G	G	G	A	G	G	A	C	T	T	G	A	A	A	G	A	G	C	C	A	C
210	Delta	>47091|29662|29890	C	A	A	T	C	T	T	T	A	A	T	C	A	G	T	G	T	G	T	A	A	C	A	T	T	A	G	G	G	A	G	G	A	C	T	T	G	A	A	A	G	A	G	C	C	A	C
211	Delta	>47035|29662|29890	C	A	A	T	C	T	T	T	A	A	T	C	A	G	T	G	T	G	T	A	A	C	A	T	T	A	G	G	G	A	G	G	A	C	T	T	G	A	A	A	G	A	G	C	C	A	C
212	Delta	>47031|29662|29890	C	A	A	T	C	T	T	T	A	A	T	C	A	G	T	G	T	G	T	A	A	C	A	T	T	A	G	G	G	A	G	G	A	C	T	T	G	A	A	A	G	A	G	C	C	A	C
213	Delta	>46994|29659|29887	C	A	A	T	C	T	T	T	A	A	T	C	A	G	T	G	T	G	T	A	A	C	A	T	T	A	G	G	G	A	G	G	A	C	T	T	G	A	A	A	G	A	G	C	C	A	C
214	Delta	>46989|29662|29890	C	A	A	T	C	T	T	T	A	A	T	C	A	G	T	G	T	G	T	A	A	C	A	T	T	A	G	G	G	A	G	G	A	C	T	T	G	A	A	A	G	A	G	C	C	A	C
215	Delta	>46978|29662|29890	C	A	A	T	C	T	T	T	A	A	T	C	A	G	T	G	T	G	T	A	A	C	A	T	T	A	G	G	G	A	G	G	A	C	T	T	G	A	A	A	G	A	G	C	C	A	C
216	Delta	>46955|29662|29890	C	A	A	T	C	T	T	T	A	A	T	C	A	G	T	G	T	G	T	A	A	C	A	T	T	A	G	G	G	A	G	G	A	C	T	T	G	A	A	A	G	A	G	C	C	A	C
217	Delta	>46947|29662|29890	C	A	A	T	C	T	T	T	A	A	T	C	A	G	T	G	T	G	T	A	A	C	A	T	T	A	G	G	G	A	G	G	A	C	T	T	G	A	A	A	G	A	G	C	C	A	C
218	Delta	>46938|29662|29890	C	A	A	T	C	T	T	T	A	A	T	C	A	G	T	G	T	G	T	A	A	C	A	T	T	A	G	G	G	A	G	G	A	C	T	T	G	A	A	A	G	A	G	C	C	A	C
219	Delta	>46873|29662|29890	C	A	A	T	C	T	T	T	A	A	T	C	A	G	T	G	T	G	T	A	A	C	A	T	T	A	G	G	G	A	G	G	A	C	T	T	G	A	A	A	G	A	G	C	C	A	C
220	Delta	>46872|29662|29890	C	A	A	T	C	T	T	T	A	A	T	C	A	G	T	G	T	G	T	A	A	C	A	T	T	A	G	G	G	A	G	G	A	C	T	T	G	A	A	A	G	A	G	C	C	A	C
221	Delta	>46866|29662|29890	C	A	A	T	C	T	T	T	A	A	T	C	A	G	T	G	T	G	T	A	A	C	A	T	T	A	G	G	G	A	G	G	A	C	T	T	G	A	A	A	G	A	G	C	C	A	C
222	Delta	>46857|29662|29890	C	A	A	T	C	T	T	T	A	A	T	C	A	G	T	G	T	G	T	A	A	C	A	T	T	A	G	G	G	A	G	G	A	C	T	T	G	A	A	A	G	A	G	C	C	A	C
223	Delta	>46852|29662|29890	C	A	A	T	C	T	T	T	A	A	T	C	A	G	T	G	T	G	T	A	A	C	A	T	T	A	G	G	G	A	G	G	A	C	T	T	G	A	A	A	G	A	G	C	C	A	C
224	Delta	>46846|29662|29890	C	A	A	T	C	T	T	T	A	A	T	C	A	G	T	G	T	G	T	A	A	C	A	T	T	A	G	G	G	A	G	G	A	C	T	T	G	A	A	A	G	A	G	C	C	A	C
225	Delta	>46841|29662|29890	C	A	A	T	C	T	T	T	A	A	T	C	A	G	T	G	T	G	T	A	A	C	A	T	T	A	G	G	G	A	G	G	A	C	T	T	G	A	A	A	G	A	G	C	C	A	C
226	Delta	>46162|29662|29890	C	A	A	T	C	T	T	T	A	A	T	C	A	G	T	G	T	G	T	A	A	C	A	T	T	A	G	G	G	A	G	G	A	C	T	T	G	A	A	A	G	A	G	C	C	A	C
227	Delta	>46124|29662|29890	C	A	A	T	C	T	T	T	A	A	T	C	A	G	T	G	T	G	T	A	A	C	A	T	T	A	G	G	G	A	G	G	A	C	T	T	G	A	A	A	G	A	G	C	C	A	C
228	Delta	>46091|29662|29890	C	A	A	T	C	T	T	T	A	A	T	C	A	G	T	G	T	G	T	A	A	C	A	T	T	A	G	G	G	A	G	G	A	C	T	T	G	A	A	A	G	A	G	C	C	A	C
229	Delta	>45704|29662|29890	C	A	A	T	C	T	T	T	A	A	T	C	A	G	T	G	T	G	T	A	A	C	A	T	T	A	G	G	G	A	G	G	A	C	T	T	G	A	A	A	G	A	G	C	C	A	C
230	Delta	>45700|29668|29896	C	A	A	T	C	T	T	T	A	A	T	C	A	G	T	G	T	G	T	A	A	C	A	T	T	A	G	G	G	A	G	G	A	C	T	T	G	A	A	A	G	A	G	C	C	A	C
231	Delta	>45679|29662|29890	C	A	A	T	C	T	T	T	A	A	T	C	A	G	T	G	T	G	T	A	A	C	A	T	T	A	G	G	G	A	G	G	A	C	T	T	G	A	A	A	G	A	G	C	C	A	C
232	Delta	>45669|29662|29890	C	A	A	T	C	T	T	T	A	A	T	C	A	G	T	G	T	G	T	A	A	C	A	T	T	A	G	G	G	A	G	G	A	C	T	T	G	A	A	A	G	A	G	C	C	A	C
233	Delta	>37218|29662|29890	C	A	A	T	C	T	T	T	A	A	T	C	A	G	T	G	T	G	T	A	A	C	A	T	T	A	G	G	G	A	G	G	A	C	T	T	G	A	A	A	G	A	G	C	C	A	C
234	Delta	>37097|29662|29890	C	A	A	T	C	T	T	T	A	A	T	C	A	G	T	G	T	G	T	A	A	C	A	T	T	A	G	G	G	A	G	G	A	C	T	T	G	A	A	A	G	A	G	C	C	A	C
235	Delta	>27501|29662|29890	C	A	A	T	C	T	T	T	A	A	T	C	A	G	T	G	T	G	T	A	A	C	A	T	T	A	G	G	G	A	G	G	A	C	T	T	G	A	A	A	G	A	G	C	C	A	C
236	Delta	>27463|29662|29890	C	A	A	T	C	T	T	T	A	A	T	C	A	G	T	G	T	G	T	A	A	C	A	T	T	A	G	G	G	A	G	G	A	C	T	T	G	A	A	A	G	A	G	C	C	A	C
237	Delta	>27446|29657|29885	C	A	A	T	C	T	T	T	A	A	T	C	A	G	T	G	T	G	T	A	A	C	A	T	T	A	G	G	G	A	G	G	A	C	T	T	G	A	A	A	G	A	G	C	C	A	C
238	Delta	>27445|29668|29896	C	A	A	T	C	T	T	T	A	A	T	C	A	G	T	G	T	G	T	A	A	C	A	T	T	A	G	G	G	A	G	G	A	C	T	T	G	A	A	A	G	A	G	C	C	A	C
239	Delta	>27440|29662|29890	C	A	A	T	C	T	T	T	A	A	T	C	A	G	T	G	T	G	T	A	A	C	A	T	T	A	G	G	G	A	G	G	A	C	T	T	G	A	A	A	G	A	G	C	C	A	C
240	Delta	>27418|29653|29881	C	A	A	T	C	T	T	T	A	A	T	C	A	G	T	G	T	G	T	A	A	C	A	T	T	A	G	G	G	A	G	G	A	C	T	T	G	A	A	A	G	A	G	C	C	A	C
241	Delta	>27415|29668|29896	C	A	A	T	C	T	T	T	A	A	T	C	A	G	T	G	T	G	T	A	A	C	A	T	T	A	G	G	G	A	G	G	A	C	T	T	G	A	A	A	G	A	G	C	C	A	C
242	Delta	>27407|29662|29890	C	A	A	T	C	T	T	T	A	A	T	C	A	G	T	G	T	G	T	A	A	C	A	T	T	A	G	G	G	A	G	G	A	C	T	T	G	A	A	A	G	A	G	C	C	A	C
243	Delta	>27394|29668|29896	C	A	A	T	C	T	T	T	A	A	T	C	A	G	T	G	T	G	T	A	A	C	A	T	T	A	G	G	G	A	G	G	A	C	T	T	G	A	A	A	G	A	G	C	C	A	C
244	Delta	>27392|29662|29890	C	A	A	T	C	T	T	T	A	A	T	C	A	G	T	G	T	G	T	A	A	C	A	T	T	A	G	G	G	A	G	G	A	C	T	T	G	A	A	A	G	A	G	C	C	A	C
245	Delta	>27391|29662|29890	C	A	A	T	C	T	T	T	A	A	T	C	A	G	T	G	T	G	T	A	A	C	A	T	T	A	G	G	G	A	G	G	A	C	T	T	G	A	A	A	G	A	G	C	C	A	C
246	Delta	>27370|29659|29887	C	A	A	T	C	T	T	T	A	A	T	C	A	G	T	G	T	G	T	A	A	C	A	T	T	A	G	G	G	A	G	G	A	C	T	T	G	A	A	A	G	A	G	C	C	A	C
247	Delta	>27367|29662|29890	C	A	A	T	C	T	T	T	A	A	T	C	A	G	T	G	T	G	T	A	A	C	A	T	T	A	G	G	G	A	G	G	A	C	T	T	G	A	A	A	G	A	G	C	C	A	C
248	Delta	>27312|29653|29881	C	A	A	T	C	T	T	T	A	A	T	C	A	G	T	G	T	G	T	A	A	C	A	T	T	A	G	G	G	A	G	G	A	C	T	T	G	A	A	A	G	A	G	C	C	A	C
249	Delta	>27311|29662|29890	C	A	A	T	C	T	T	T	A	A	T	C	A	G	T	G	T	G	T	A	A	C	A	T	T	A	G	G	G	A	G	G	A	C	T	T	G	A	A	A	G	A	G	C	C	A	C
250	Delta	>27261|29659|29887	C	A	A	T	C	T	T	T	A	A	T	C	A	G	T	G	T	G	T	A	A	C	A	T	T	A	G	G	G	A	G	G	A	C	T	T	G	A	A	A	G	A	G	C	C	A	C
251	Delta	>27175|29662|29890	C	A	A	T	C	T	T	T	A	A	T	C	A	G	T	G	T	G	T	A	A	C	A	T	T	A	G	G	G	A	G	G	A	C	T	T	G	A	A	A	G	A	G	C	C	A	C
252	Delta	>27166|29662|29890	C	A	A	T	C	T	T	T	A	A	T	C	A	G	T	G	T	G	T	A	A	C	A	T	T	A	G	G	G	A	G	G	A	C	T	T	G	A	A	A	G	A	G	C	C	A	C
253	Delta	>27162|29653|29881	C	A	A	T	C	T	T	T	A	A	T	C	A	G	T	G	T	G	T	A	A	C	A	T	T	A	G	G	G	A	G	G	A	C	T	T	G	A	A	A	G	A	G	C	C	A	C
254	Delta	>27156|29662|29890	C	A	A	T	C	T	T	T	A	A	T	C	A	G	T	G	T	G	T	A	A	C	A	T	T	A	G	G	G	A	G	G	A	C	T	T	G	A	A	A	G	A	G	C	C	A	C
255	Delta	>27150|29668|29896	C	A	A	T	C	T	T	T	A	A	T	C	A	G	T	G	T	G	T	A	A	C	A	T	T	A	G	G	G	A	G	G	A	C	T	T	G	A	A	A	G	A	G	C	C	A	C
256	Delta	>27099|29662|29890	C	A	A	T	C	T	T	T	A	A	T	C	A	G	T	G	T	G	T	A	A	C	A	T	T	A	G	G	G	A	G	G	A	C	T	T	G	A	A	A	G	A	G	C	C	A	C
257	Delta	>26320|29662|29890	C	A	A	T	C	T	T	T	A	A	T	C	A	G	T	G	T	G	T	A	A	C	A	T	T	A	G	G	G	A	G	G	A	C	T	T	G	A	A	A	G	A	G	C	C	A	C
258	Delta	>22440|29671|29899	C	A	A	T	C	T	T	T	A	A	T	C	A	G	T	G	T	G	T	A	A	C	A	T	T	A	G	G	G	A	G	G	A	C	T	T	G	A	A	A	G	A	G	C	C	A	C
259	Delta	>22438|29648|29876	C	A	A	T	C	T	T	T	A	A	T	C	A	G	T	G	T	G	T	A	A	C	A	T	T	A	G	G	G	A	G	G	A	C	T	T	G	A	A	A	G	A	G	C	C	A	C
260	Delta	>22437|29646|29874	C	A	A	T	C	T	T	T	A	A	T	C	A	G	T	G	T	G	T	A	A	C	A	T	T	A	G	G	G	A	G	G	A	C	T	T	G	A	A	A	G	A	G	C	C	A	C
261	Delta	>22436|29646|29874	C	A	A	T	C	T	T	T	A	A	T	C	A	G	T	G	T	G	T	A	A	C	A	T	T	A	G	G	G	A	G	G	A	C	T	T	G	A	A	A	G	A	G	C	C	A	C
262	Delta	>22435|29673|29901	C	A	A	T	C	T	T	T	A	A	T	C	A	G	T	G	T	G	T	A	A	C	A	T	T	A	G	G	G	A	G	G	A	C	T	T	G	A	A	A	G	A	G	C	C	A	C
263	Delta	>22434|29665|29893	C	A	A	T	C	T	T	T	A	A	T	C	A	G	T	G	T	G	T	A	A	C	A	T	T	A	G	G	G	A	G	G	A	C	T	T	G	A	A	A	G	A	G	C	C	A	C
264	Delta	>22431|29669|29897	C	A	A	T	C	T	T	T	A	A	T	C	A	G	T	G	T	G	T	A	A	C	A	T	T	A	G	G	G	A	G	G	A	C	T	T	G	A	A	A	G	A	G	C	C	A	C
265	Delta	>22386|29644|29872	C	A	A	T	C	T	T	T	A	A	T	C	A	G	T	G	T	G	T	A	A	C	A	T	T	A	G	G	G	A	G	G	A	C	T	T	G	A	A	A	G	A	G	C	C	A	C
266	Delta	>22385|29645|29873	C	A	A	T	C	T	T	T	A	A	T	C	A	G	T	G	T	G	T	A	A	C	A	T	T	A	G	G	G	A	G	G	A	C	T	T	G	A	A	A	G	A	G	C	C	A	C
267	Delta	>22381|29673|29901	C	A	A	T	C	T	T	T	A	A	T	C	A	G	T	G	T	G	T	A	A	C	A	T	T	A	G	G	G	A	G	G	A	C	T	T	G	A	A	A	G	A	G	C	C	A	C
268	Delta	>22379|29643|29871	C	A	A	T	C	T	T	T	A	A	T	C	A	G	T	G	T	G	T	A	A	C	A	T	T	A	G	G	G	A	G	G	A	C	T	T	G	A	A	A	G	A	G	C	C	A	C
269	Delta	>22378|29669|29897	C	A	A	T	C	T	T	T	A	A	T	C	A	G	T	G	T	G	T	A	A	C	A	T	T	A	G	G	G	A	G	G	A	C	T	T	G	A	A	A	G	A	G	C	C	A	C
270	Delta	>21920|29650|29878	C	A	A	T	C	T	T	T	A	A	T	C	A	G	T	G	T	G	T	A	A	C	A	T	T	A	G	G	G	A	G	G	A	C	T	T	G	A	A	A	G	A	G	C	C	A	C
271	Delta	>21918|29665|29893	C	A	A	T	C	T	T	T	A	A	T	C	A	G	T	G	T	G	T	A	A	C	A	T	T	A	G	G	G	A	G	G	A	C	T	T	G	A	A	A	G	A	G	C	C	A	C
272	Delta	>21915|29670|29898	C	A	A	T	C	T	T	T	A	A	T	C	A	G	T	G	T	G	T	A	A	C	A	T	T	A	G	G	G	A	G	G	A	C	T	T	G	A	A	A	G	A	G	C	C	A	C
273	Delta	>21912|29646|29874	C	A	A	T	C	T	T	T	A	A	T	C	A	G	T	G	T	G	T	A	A	C	A	T	T	A	G	G	G	A	G	G	A	C	T	T	G	A	A	A	G	A	G	C	C	A	C
274	Delta	>21911|29645|29873	C	A	A	T	C	T	T	T	A	A	T	C	A	G	T	G	T	G	T	A	A	C	A	T	T	A	G	G	G	A	G	G	A	C	T	T	G	A	A	A	G	A	G	C	C	A	C
275	Delta	>21910|29667|29895	C	A	A	T	C	T	T	T	A	A	T	C	A	G	T	G	T	G	T	A	A	C	A	T	T	A	G	G	G	A	G	G	A	C	T	T	G	A	A	A	G	A	G	C	C	A	C
276	Delta	>21909|29659|29887	C	A	A	T	C	T	T	T	A	A	T	C	A	G	T	G	T	G	T	A	A	C	A	T	T	A	G	G	G	A	G	G	A	C	T	T	G	A	A	A	G	A	G	C	C	A	C
277	Delta	>21908|29671|29899	C	A	A	T	C	T	T	T	A	A	T	C	A	G	T	G	T	G	T	A	A	C	A	T	T	A	G	G	G	A	G	G	A	C	T	T	G	A	A	A	G	A	G	C	C	A	C
278	Delta	>21907|29648|29876	C	A	A	T	C	T	T	T	A	A	T	C	A	G	T	G	T	G	T	A	A	C	A	T	T	A	G	G	G	A	G	G	A	C	T	T	G	A	A	A	G	A	G	C	C	A	C
279	Delta	>21811|29672|29900	C	A	A	T	C	T	T	T	A	A	T	C	A	G	T	G	T	G	T	A	A	C	A	T	T	A	G	G	G	A	G	G	A	C	T	T	G	A	A	A	G	A	G	C	C	A	C
280	Delta	>21753|29647|29875	C	A	A	T	C	T	T	T	A	A	T	C	A	G	T	G	T	G	T	A	A	C	A	T	T	A	G	G	G	A	G	G	A	C	T	T	G	A	A	A	G	A	G	C	C	A	C
281	Delta	>21752|29661|29889	C	A	A	T	C	T	T	T	A	A	T	C	A	G	T	G	T	G	T	A	A	C	A	T	T	A	G	G	G	A	G	G	A	C	T	T	G	A	A	A	G	A	G	C	C	A	C
282	Delta	>21751|29645|29873	C	A	A	T	C	T	T	T	A	A	T	C	A	G	T	G	T	G	T	A	A	C	A	T	T	A	G	G	G	A	G	G	A	C	T	T	G	A	A	A	G	A	G	C	C	A	C
283	Delta	>21750|29645|29873	C	A	A	T	C	T	T	T	A	A	T	C	A	G	T	G	T	G	T	A	A	C	A	T	T	A	G	G	G	A	G	G	A	C	T	T	G	A	A	A	G	A	G	C	C	A	C
284	Delta	>21749|29646|29874	C	A	A	T	C	T	T	T	A	A	T	C	A	G	T	G	T	G	T	A	A	C	A	T	T	A	G	G	G	A	G	G	A	C	T	T	G	A	A	A	G	A	G	C	C	A	C
285	Delta	>21748|29645|29873	C	A	A	T	C	T	T	T	A	A	T	C	A	G	T	G	T	G	T	A	A	C	A	T	T	A	G	G	G	A	G	G	A	C	T	T	G	A	A	A	G	A	G	C	C	A	C
286	Delta	>21747|29670|29898	C	A	A	T	C	T	T	T	A	A	T	C	A	G	T	G	T	G	T	A	A	C	A	T	T	A	G	G	G	A	G	G	A	C	T	T	G	A	A	A	G	A	G	C	C	A	C
287	Delta	>21649|29650|29878	C	A	A	T	C	T	T	T	A	A	T	C	A	G	T	G	T	G	T	A	A	C	A	T	T	A	G	G	G	A	G	G	A	C	T	T	G	A	A	A	G	A	G	C	C	A	C
288	Delta	>21648|29650|29878	C	A	A	T	C	T	T	T	A	A	T	C	A	G	T	G	T	G	T	A	A	C	A	T	T	A	G	G	G	A	G	G	A	C	T	T	G	A	A	A	G	A	G	C	C	A	C
289	Delta	>21646|29650|29878	C	A	A	T	C	T	T	T	A	A	T	C	A	G	T	G	T	G	T	A	A	C	A	T	T	A	G	G	G	A	G	G	A	C	T	T	G	A	A	A	G	A	G	C	C	A	C
290	Delta	>21641|29659|29887	C	A	A	T	C	T	T	T	A	A	T	C	A	G	T	G	T	G	T	A	A	C	A	T	T	A	G	G	G	A	G	G	A	C	T	T	G	A	A	A	G	A	G	C	C	A	C
291	Delta	>21637|29653|29881	C	A	A	T	C	T	T	T	A	A	T	C	A	G	T	G	T	G	T	A	A	C	A	T	T	A	G	G	G	A	G	G	A	C	T	T	G	A	A	A	G	A	G	C	C	A	C
292	Delta	>21635|29662|29890	C	A	A	T	C	T	T	T	A	A	T	C	A	G	T	G	T	G	T	A	A	C	A	T	T	A	G	G	G	A	G	G	A	C	T	T	G	A	A	A	G	A	G	C	C	A	C
293	Delta	>21260|29659|29887	C	A	A	T	C	T	T	T	A	A	T	C	A	G	T	G	T	G	T	A	A	C	A	T	T	A	G	G	G	A	G	G	A	C	T	T	G	A	A	A	G	A	G	C	C	A	C
294	Delta	>21239|29659|29887	C	A	A	T	C	T	T	T	A	A	T	C	A	G	T	G	T	G	T	A	A	C	A	T	T	A	G	G	G	A	G	G	A	C	T	T	G	A	A	A	G	A	G	C	C	A	C
295	Delta	>18538|29662|29890	C	A	A	T	C	T	T	T	A	A	T	C	A	G	T	G	T	G	T	A	A	C	A	T	T	A	G	G	G	A	G	G	A	C	T	T	G	A	A	A	G	A	G	C	C	A	C
296	Delta	>18466|29662|29890	C	A	A	T	C	T	T	T	A	A	T	C	A	G	T	G	T	G	T	A	A	C	A	T	T	A	G	G	G	A	G	G	A	C	T	T	G	A	A	A	G	A	G	C	C	A	C
297	Delta	>18456|29668|29896	C	A	A	T	C	T	T	T	A	A	T	C	A	G	T	G	T	G	T	A	A	C	A	T	T	A	G	G	G	A	G	G	A	C	T	T	G	A	A	A	G	A	G	C	C	A	C
298	Delta	>17328|29669|29897	C	A	A	T	C	T	T	T	A	A	T	C	A	G	T	G	T	G	T	A	A	C	A	T	T	A	G	G	G	A	G	G	A	C	T	T	G	A	A	A	G	A	G	C	C	A	C
299	Delta	>17327|29673|29901	C	A	A	T	C	T	T	T	A	A	T	C	A	G	T	G	T	G	T	A	A	C	A	T	T	A	G	G	G	A	G	G	A	C	T	T	G	A	A	A	G	A	G	C	C	A	C
300	Delta	>17326|29647|29875	C	A	A	T	C	T	T	T	A	A	T	C	A	G	T	G	T	G	T	A	A	C	A	T	T	A	G	G	G	A	G	G	A	C	T	T	G	A	A	A	G	A	G	C	C	A	C
301	Delta	>17325|29653|29881	C	A	A	T	C	T	T	T	A	A	T	C	A	G	T	G	T	G	T	A	A	C	A	T	T	A	G	G	G	A	G	G	A	C	T	T	G	A	A	A	G	A	G	C	C	A	C
302	Delta	>17324|29646|29874	C	A	A	T	C	T	T	T	A	A	T	C	A	G	T	G	T	G	T	A	A	C	A	T	T	A	G	G	G	A	G	G	A	C	T	T	G	A	A	A	G	A	G	C	C	A	C
303	Delta	>17323|29668|29896	C	A	A	T	C	T	T	T	A	A	T	C	A	G	T	G	T	G	T	A	A	C	A	T	T	A	G	G	G	A	G	G	A	C	T	T	G	A	A	A	G	A	G	C	C	A	C
304	Delta	>17322|29670|29898	C	A	A	T	C	T	T	T	A	A	T	C	A	G	T	G	T	G	T	A	A	C	A	T	T	A	G	G	G	A	G	G	A	C	T	T	G	A	A	A	G	A	G	C	C	A	C
305	Delta	>17321|29646|29874	C	A	A	T	C	T	T	T	A	A	T	C	A	G	T	G	T	G	T	A	A	C	A	T	T	A	G	G	G	A	G	G	A	C	T	T	G	A	A	A	G	A	G	C	C	A	C
306	Delta	>17303|29646|29874	C	A	A	T	C	T	T	T	A	A	T	C	A	G	T	G	T	G	T	A	A	C	A	T	T	A	G	G	G	A	G	G	A	C	T	T	G	A	A	A	G	A	G	C	C	A	C
307	Delta	>17180|29670|29898	C	A	A	T	C	T	T	T	A	A	T	C	A	G	T	G	T	G	T	A	A	C	A	T	T	A	G	G	G	A	G	G	A	C	T	T	G	A	A	A	G	A	G	C	C	A	C
308	Delta	>17179|29647|29875	C	A	A	T	C	T	T	T	A	A	T	C	A	G	T	G	T	G	T	A	A	C	A	T	T	A	G	G	G	A	G	G	A	C	T	T	G	A	A	A	G	A	G	C	C	A	C
309	Delta	>17178|29652|29880	C	A	A	T	C	T	T	T	A	A	T	C	A	G	T	G	T	G	T	A	A	C	A	T	T	A	G	G	G	A	G	G	A	C	T	T	G	A	A	A	G	A	G	C	C	A	C
310	Delta	>17089|29651|29879	C	A	A	T	C	T	T	T	A	A	T	C	A	G	T	G	T	G	T	A	A	C	A	T	T	A	G	G	G	A	G	G	A	C	T	T	G	A	A	A	G	A	G	C	C	A	C
311	Delta	>17088|29660|29888	C	A	A	T	C	T	T	T	A	A	T	C	A	G	T	G	T	G	T	A	A	C	A	T	T	A	G	G	G	A	G	G	A	C	T	T	G	A	A	A	G	A	G	C	C	A	C
312	Delta	>17086|29673|29901	C	A	A	T	C	T	T	T	A	A	T	C	A	G	T	G	T	G	T	A	A	C	A	T	T	A	G	G	G	A	G	G	A	C	T	T	G	A	A	A	G	A	G	C	C	A	C
313	Delta	>17085|29664|29892	C	A	A	T	C	T	T	T	A	A	T	C	A	G	T	G	T	G	T	A	A	C	A	T	T	A	G	G	G	A	G	G	A	C	T	T	G	A	A	A	G	A	G	C	C	A	C
314	Delta	>154193|29662|29890	C	A	A	T	C	T	T	T	A	A	T	C	A	G	T	G	T	G	T	A	A	C	A	T	T	A	G	G	G	A	G	G	A	C	T	T	G	A	A	A	G	A	G	C	C	A	C
315	Delta	>154050|29623|29851	C	A	A	T	C	T	T	T	A	A	T	C	A	G	T	G	T	G	T	A	A	C	A	T	T	A	G	G	G	A	G	G	A	C	T	T	G	A	A	A	G	A	G	C	C	A	C
316	Delta	>154011|29688|29916	C	A	A	T	C	T	T	T	A	A	T	C	A	G	T	G	T	G	T	A	A	C	A	T	T	A	G	G	G	A	G	G	A	C	T	T	G	A	A	A	G	A	G	C	C	A	C
317	Delta	>154010|29654|29882	C	A	A	T	C	T	T	T	A	A	T	C	A	G	T	G	T	G	T	A	A	C	A	T	T	A	G	G	G	A	G	G	A	C	T	T	G	A	A	A	G	A	G	C	C	A	C
318	Delta	>154009|29654|29882	C	A	A	T	C	T	T	T	A	A	T	C	A	G	T	G	T	G	T	A	A	C	A	T	T	A	G	G	G	A	G	G	A	C	T	T	G	A	A	A	G	A	G	C	C	A	C
319	Delta	>154008|29655|29883	C	A	A	T	C	T	T	T	A	A	T	C	A	G	T	G	T	G	T	A	A	C	A	T	T	A	G	G	G	A	G	G	A	C	T	T	G	A	A	A	G	A	G	C	C	A	C
320	Delta	>154007|29662|29890	C	A	A	T	C	T	T	T	A	A	T	C	A	G	T	G	T	G	T	A	A	C	A	T	T	A	G	G	G	A	G	G	A	C	T	T	G	A	A	A	G	A	G	C	C	A	C
321	Delta	>154006|29662|29890	C	A	A	T	C	T	T	T	A	A	T	C	A	G	T	G	T	G	T	A	A	C	A	T	T	A	G	G	G	A	G	G	A	C	T	T	G	A	A	A	G	A	G	C	C	A	C
322	Delta	>154004|29662|29890	C	A	A	T	C	T	T	T	A	A	T	C	A	G	T	G	T	G	T	A	A	C	A	T	T	A	G	G	G	A	G	G	A	C	T	T	G	A	A	A	G	A	G	C	C	A	C
323	Delta	>154003|29662|29890	C	A	A	T	C	T	T	T	A	A	T	C	A	G	T	G	T	G	T	A	A	C	A	T	T	A	G	G	G	A	G	G	A	C	T	T	G	A	A	A	G	A	G	C	C	A	C
324	Delta	>154002|29659|29887	C	A	A	T	C	T	T	T	A	A	T	C	A	G	T	G	T	G	T	A	A	C	A	T	T	A	G	G	G	A	G	G	A	C	T	T	G	A	A	A	G	A	G	C	C	A	C
325	Delta	>154001|29647|29875	C	A	A	T	C	T	T	T	A	A	T	C	A	G	T	G	T	G	T	A	A	C	A	T	T	A	G	G	G	A	G	G	A	C	T	T	G	A	A	A	G	A	G	C	C	A	C
326	Delta	>154000|29659|29887	C	A	A	T	C	T	T	T	A	A	T	C	A	G	T	G	T	G	T	A	A	C	A	T	T	A	G	G	G	A	G	G	A	C	T	T	G	A	A	A	G	A	G	C	C	A	C
327	Delta	>153999|29662|29890	C	A	A	T	C	T	T	T	A	A	T	C	A	G	T	G	T	G	T	A	A	C	A	T	T	A	G	G	G	A	G	G	A	C	T	T	G	A	A	A	G	A	G	C	C	A	C
328	Delta	>153998|29662|29890	C	A	A	T	C	T	T	T	A	A	T	C	A	G	T	G	T	G	T	A	A	C	A	T	T	A	G	G	G	A	G	G	A	C	T	T	G	A	A	A	G	A	G	C	C	A	C
329	Delta	>153997|29662|29890	C	A	A	T	C	T	T	T	A	A	T	C	A	G	T	G	T	G	T	A	A	C	A	T	T	A	G	G	G	A	G	G	A	C	T	T	G	A	A	A	G	A	G	C	C	A	C
330	Delta	>153996|29662|29890	C	A	A	T	C	T	T	T	A	A	T	C	A	G	T	G	T	G	T	A	A	C	A	T	T	A	G	G	G	A	G	G	A	C	T	T	G	A	A	A	G	A	G	C	C	A	C
331	Delta	>153995|29662|29890	C	A	A	T	C	T	T	T	A	A	T	C	A	G	T	G	T	G	T	A	A	C	A	T	T	A	G	G	G	A	G	G	A	C	T	T	G	A	A	A	G	A	G	C	C	A	C
332	Delta	>153994|29647|29875	C	A	A	T	C	T	T	T	A	A	T	C	A	G	T	G	T	G	T	A	A	C	A	T	T	A	G	G	G	A	G	G	A	C	T	T	G	A	A	A	G	A	G	C	C	A	C
333	Delta	>153993|29662|29890	C	A	A	T	C	T	T	T	A	A	T	C	A	G	T	G	T	G	T	A	A	C	A	T	T	A	G	G	G	A	G	G	A	C	T	T	G	A	A	A	G	A	G	C	C	A	C
334	Delta	>153992|29662|29890	C	A	A	T	C	T	T	T	A	A	T	C	A	G	T	G	T	G	T	A	A	C	A	T	T	A	G	G	G	A	G	G	A	C	T	T	G	A	A	A	G	A	G	C	C	A	C
335	Delta	>153991|29665|29893	C	A	A	T	C	T	T	T	A	A	T	C	A	G	T	G	T	G	T	A	A	C	A	T	T	A	G	G	G	A	G	G	A	C	T	T	G	A	A	A	G	A	G	C	C	A	C
336	Delta	>153990|29662|29890	C	A	A	T	C	T	T	T	A	A	T	C	A	G	T	G	T	G	T	A	A	C	A	T	T	A	G	G	G	A	G	G	A	C	T	T	G	A	A	A	G	A	G	C	C	A	C
337	Delta	>153989|29662|29890	C	A	A	T	C	T	T	T	A	A	T	C	A	G	T	G	T	G	T	A	A	C	A	T	T	A	G	G	G	A	G	G	A	C	T	T	G	A	A	A	G	A	G	C	C	A	C
338	Delta	>153988|29656|29884	C	A	A	T	C	T	T	T	A	A	T	C	A	G	T	G	T	G	T	A	A	C	A	T	T	A	G	G	G	A	G	G	A	C	T	T	G	A	A	A	G	A	G	C	C	A	C
339	Delta	>153987|29662|29890	C	A	A	T	C	T	T	T	A	A	T	C	A	G	T	G	T	G	T	A	A	C	A	T	T	A	G	G	G	A	G	G	A	C	T	T	G	A	A	A	G	A	G	C	C	A	C
340	Delta	>153986|29647|29875	C	A	A	T	C	T	T	T	A	A	T	C	A	G	T	G	T	G	T	A	A	C	A	T	T	A	G	G	G	A	G	G	A	C	T	T	G	A	A	A	G	A	G	C	C	A	C
341	Delta	>153985|29662|29890	C	A	A	T	C	T	T	T	A	A	T	C	A	G	T	G	T	G	T	A	A	C	A	T	T	A	G	G	G	A	G	G	A	C	T	T	G	A	A	A	G	A	G	C	C	A	C
342	Delta	>153984|29662|29890	C	A	A	T	C	T	T	T	A	A	T	C	A	G	T	G	T	G	T	A	A	C	A	T	T	A	G	G	G	A	G	G	A	C	T	T	G	A	A	A	G	A	G	C	C	A	C
343	Delta	>153983|29653|29881	C	A	A	T	C	T	T	T	A	A	T	C	A	G	T	G	T	G	T	A	A	C	A	T	T	A	G	G	G	A	G	G	A	C	T	T	G	A	A	A	G	A	G	C	C	A	C
344	Delta	>153982|29662|29890	C	A	A	T	C	T	T	T	A	A	T	C	A	G	T	G	T	G	T	A	A	C	A	T	T	A	G	G	G	A	G	G	A	C	T	T	G	A	A	A	G	A	G	C	C	A	C
345	Delta	>153981|29662|29890	C	A	A	T	C	T	T	T	A	A	T	C	A	G	T	G	T	G	T	A	A	C	A	T	T	A	G	G	G	A	G	G	A	C	T	T	G	A	A	A	G	A	G	C	C	A	C
346	Delta	>153980|29662|29890	C	A	A	T	C	T	T	T	A	A	T	C	A	G	T	G	T	G	T	A	A	C	A	T	T	A	G	G	G	A	G	G	A	C	T	T	G	A	A	A	G	A	G	C	C	A	C
347	Delta	>153979|29662|29890	C	A	A	T	C	T	T	T	A	A	T	C	A	G	T	G	T	G	T	A	A	C	A	T	T	A	G	G	G	A	G	G	A	C	T	T	G	A	A	A	G	A	G	C	C	A	C
348	Delta	>153978|29659|29887	C	A	A	T	C	T	T	T	A	A	T	C	A	G	T	G	T	G	T	A	A	C	A	T	T	A	G	G	G	A	G	G	A	C	T	T	G	A	A	A	G	A	G	C	C	A	C
349	Delta	>153977|29659|29887	C	A	A	T	C	T	T	T	A	A	T	C	A	G	T	G	T	G	T	A	A	C	A	T	T	A	G	G	G	A	G	G	A	C	T	T	G	A	A	A	G	A	G	C	C	A	C
350	Delta	>153976|29662|29890	C	A	A	T	C	T	T	T	A	A	T	C	A	G	T	G	T	G	T	A	A	C	A	T	T	A	G	G	G	A	G	G	A	C	T	T	G	A	A	A	G	A	G	C	C	A	C
351	Delta	>153975|29662|29890	C	A	A	T	C	T	T	T	A	A	T	C	A	G	T	G	T	G	T	A	A	C	A	T	T	A	G	G	G	A	G	G	A	C	T	T	G	A	A	A	G	A	G	C	C	A	C
352	Delta	>153974|29662|29890	C	A	A	T	C	T	T	T	A	A	T	C	A	G	T	G	T	G	T	A	A	C	A	T	T	A	G	G	G	A	G	G	A	C	T	T	G	A	A	A	G	A	G	C	C	A	C
353	Delta	>153972|29662|29890	C	A	A	T	C	T	T	T	A	A	T	C	A	G	T	G	T	G	T	A	A	C	A	T	T	A	G	G	G	A	G	G	A	C	T	T	G	A	A	A	G	A	G	C	C	A	C
354	Delta	>153970|29662|29890	C	A	A	T	C	T	T	T	A	A	T	C	A	G	T	G	T	G	T	A	A	C	A	T	T	A	G	G	G	A	G	G	A	C	T	T	G	A	A	A	G	A	G	C	C	A	C
355	Delta	>153968|29662|29890	C	A	A	T	C	T	T	T	A	A	T	C	A	G	T	G	T	G	T	A	A	C	A	T	T	A	G	G	G	A	G	G	A	C	T	T	G	A	A	A	G	A	G	C	C	A	C
356	Delta	>153965|29663|29891	C	A	A	T	C	T	T	T	A	A	T	C	A	G	T	G	T	G	T	A	A	C	A	T	T	A	G	G	G	A	G	G	A	C	T	T	G	A	A	A	G	A	G	C	C	A	C
357	Delta	>153964|29662|29890	C	A	A	T	C	T	T	T	A	A	T	C	A	G	T	G	T	G	T	A	A	C	A	T	T	A	G	G	G	A	G	G	A	C	T	T	G	A	A	A	G	A	G	C	C	A	C
358	Delta	>153962|29663|29891	C	A	A	T	C	T	T	T	A	A	T	C	A	G	T	G	T	G	T	A	A	C	A	T	T	A	G	G	G	A	G	G	A	C	T	T	G	A	A	A	G	A	G	C	C	A	C
359	Delta	>153961|29662|29890	C	A	A	T	C	T	T	T	A	A	T	C	A	G	T	G	T	G	T	A	A	C	A	T	T	A	G	G	G	A	G	G	A	C	T	T	G	A	A	A	G	A	G	C	C	A	C
360	Delta	>153402|29655|29883	C	A	A	T	C	T	T	T	A	A	T	C	A	G	T	G	T	G	T	A	A	C	A	T	T	A	G	G	G	A	G	G	A	C	T	T	G	A	A	A	G	A	G	C	C	A	C
361	Delta	>153354|29659|29887	C	A	A	T	C	T	T	T	A	A	T	C	A	G	T	G	T	G	T	A	A	C	A	T	T	A	G	G	G	A	G	G	A	C	T	T	G	A	A	A	G	A	G	C	C	A	C
362	Delta	>153352|29653|29881	C	A	A	T	C	T	T	T	A	A	T	C	A	G	T	G	T	G	T	A	A	C	A	T	T	A	G	G	G	A	G	G	A	C	T	T	G	A	A	A	G	A	G	C	C	A	C
363	Delta	>152857|29662|29890	C	A	A	T	C	T	T	T	A	A	T	C	A	G	T	G	T	G	T	A	A	C	A	T	T	A	G	G	G	A	G	G	A	C	T	T	G	A	A	A	G	A	G	C	C	A	C
364	Delta	>152856|29662|29890	C	A	A	T	C	T	T	T	A	A	T	C	A	G	T	G	T	G	T	A	A	C	A	T	T	A	G	G	G	A	G	G	A	C	T	T	G	A	A	A	G	A	G	C	C	A	C
365	Delta	>152855|29662|29890	C	A	A	T	C	T	T	T	A	A	T	C	A	G	T	G	T	G	T	A	A	C	A	T	T	A	G	G	G	A	G	G	A	C	T	T	G	A	A	A	G	A	G	C	C	A	C
366	Delta	>152854|29662|29890	C	A	A	T	C	T	T	T	A	A	T	C	A	G	T	G	T	G	T	A	A	C	A	T	T	A	G	G	G	A	G	G	A	C	T	T	G	A	A	A	G	A	G	C	C	A	C
367	Delta	>152846|29662|29890	C	A	A	T	C	T	T	T	A	A	T	C	A	G	T	G	T	G	T	A	A	C	A	T	T	A	G	G	G	A	G	G	A	C	T	T	G	A	A	A	G	A	G	C	C	A	C
368	Delta	>152845|29662|29890	C	A	A	T	C	T	T	T	A	A	T	C	A	G	T	G	T	G	T	A	A	C	A	T	T	A	G	G	G	A	G	G	A	C	T	T	G	A	A	A	G	A	G	C	C	A	C
369	Delta	>152844|29662|29890	C	A	A	T	C	T	T	T	A	A	T	C	A	G	T	G	T	G	T	A	A	C	A	T	T	A	G	G	G	A	G	G	A	C	T	T	G	A	A	A	G	A	G	C	C	A	C
370	Delta	>152843|29662|29890	C	A	A	T	C	T	T	T	A	A	T	C	A	G	T	G	T	G	T	A	A	C	A	T	T	A	G	G	G	A	G	G	A	C	T	T	G	A	A	A	G	A	G	C	C	A	C
371	Delta	>152251|29650|29878	C	A	A	T	C	T	T	T	A	A	T	C	A	G	T	G	T	G	T	A	A	C	A	T	T	A	G	G	G	A	G	G	A	C	T	T	G	A	A	A	G	A	G	C	C	A	C
372	Delta	>151115|29628|29856	C	A	A	T	C	T	T	T	A	A	T	C	A	G	T	G	T	G	T	A	A	C	A	T	T	A	G	G	G	A	G	G	A	C	T	T	G	A	A	A	G	A	G	C	C	A	C
373	Delta	>151099|29675|29903	C	A	A	T	C	T	T	T	A	A	T	C	A	G	T	G	T	G	T	A	A	C	A	T	T	A	G	G	G	A	G	G	A	C	T	T	G	A	A	A	G	A	G	C	C	A	C
374	Delta	>151063|29662|29890	C	A	A	T	C	T	T	T	A	A	T	C	A	G	T	G	T	G	T	A	A	C	A	T	T	A	G	G	G	A	G	G	A	C	T	T	G	A	A	A	G	A	G	C	C	A	C
375	Delta	>151062|29662|29890	C	A	A	T	C	T	T	T	A	A	T	C	A	G	T	G	T	G	T	A	A	C	A	T	T	A	G	G	G	A	G	G	A	C	T	T	G	A	A	A	G	A	G	C	C	A	C
376	Delta	>151061|29662|29890	C	A	A	T	C	T	T	T	A	A	T	C	A	G	T	G	T	G	T	A	A	C	A	T	T	A	G	G	G	A	G	G	A	C	T	T	G	A	A	A	G	A	G	C	C	A	C
377	Delta	>151060|29662|29890	C	A	A	T	C	T	T	T	A	A	T	C	A	G	T	G	T	G	T	A	A	C	A	T	T	A	G	G	G	A	G	G	A	C	T	T	G	A	A	A	G	A	G	C	C	A	C
378	Delta	>151059|29662|29890	C	A	A	T	C	T	T	T	A	A	T	C	A	G	T	G	T	G	T	A	A	C	A	T	T	A	G	G	G	A	G	G	A	C	T	T	G	A	A	A	G	A	G	C	C	A	C
379	Delta	>151058|29662|29890	C	A	A	T	C	T	T	T	A	A	T	C	A	G	T	G	T	G	T	A	A	C	A	T	T	A	G	G	G	A	G	G	A	C	T	T	G	A	A	A	G	A	G	C	C	A	C
380	Delta	>151057|29662|29890	C	A	A	T	C	T	T	T	A	A	T	C	A	G	T	G	T	G	T	A	A	C	A	T	T	A	G	G	G	A	G	G	A	C	T	T	G	A	A	A	G	A	G	C	C	A	C
381	Delta	>151025|29662|29890	C	A	A	T	C	T	T	T	A	A	T	C	A	G	T	G	T	G	T	A	A	C	A	T	T	A	G	G	G	A	G	G	A	C	T	T	G	A	A	A	G	A	G	C	C	A	C
382	Delta	>150939|29662|29890	C	A	A	T	C	T	T	T	A	A	T	C	A	G	T	G	T	G	T	A	A	C	A	T	T	A	G	G	G	A	G	G	A	C	T	T	G	A	A	A	G	A	G	C	C	A	C
383	Delta	>150773|29660|29888	C	A	A	T	C	T	T	T	A	A	T	C	A	G	T	G	T	G	T	A	A	C	A	T	T	A	G	G	G	A	G	G	A	C	T	T	G	A	A	A	G	A	G	C	C	A	C
384	Delta	>150724|29631|29859	C	A	A	T	C	T	T	T	A	A	T	C	A	G	T	G	T	G	T	A	A	C	A	T	T	A	G	G	G	A	G	G	A	C	T	T	G	A	A	A	G	A	G	C	C	A	C
385	Delta	>150659|29662|29890	C	A	A	T	C	T	T	T	A	A	T	C	A	G	T	G	T	G	T	A	A	C	A	T	T	A	G	G	G	A	G	G	A	C	T	T	G	A	A	A	G	A	G	C	C	A	C
386	Delta	>150625|29674|29902	C	A	A	T	C	T	T	T	A	A	T	C	A	G	T	G	T	G	T	A	A	C	A	T	T	A	G	G	G	A	G	G	A	C	T	T	G	A	A	A	G	A	G	C	C	A	C
387	Delta	>150603|29630|29858	C	A	A	T	C	T	T	T	A	A	T	C	A	G	T	G	T	G	T	A	A	C	A	T	T	A	G	G	G	A	G	G	A	C	T	T	G	A	A	A	G	A	G	C	C	A	C
388	Delta	>150582|29662|29890	C	A	A	T	C	T	T	T	A	A	T	C	A	G	T	G	T	G	T	A	A	C	A	T	T	A	G	G	G	A	G	G	A	C	T	T	G	A	A	A	G	A	G	C	C	A	C
389	Delta	>150311|29662|29890	C	A	A	T	C	T	T	T	A	A	T	C	A	G	T	G	T	G	T	A	A	C	A	T	T	A	G	G	G	A	G	G	A	C	T	T	G	A	A	A	G	A	G	C	C	A	C
390	Delta	>150280|29646|29874	C	A	A	T	C	T	T	T	A	A	T	C	A	G	T	G	T	G	T	A	A	C	A	T	T	A	G	G	G	A	G	G	A	C	T	T	G	A	A	A	G	A	G	C	C	A	C
391	Delta	>150279|29623|29851	C	A	A	T	C	T	T	T	A	A	T	C	A	G	T	G	T	G	T	A	A	C	A	T	T	A	G	G	G	A	G	G	A	C	T	T	G	A	A	A	G	A	G	C	C	A	C
392	Delta	>150277|29652|29880	C	A	A	T	C	T	T	T	A	A	T	C	A	G	T	G	T	G	T	A	A	C	A	T	T	A	G	G	G	A	G	G	A	C	T	T	G	A	A	A	G	A	G	C	C	A	C
393	Delta	>150276|29623|29851	C	A	A	T	C	T	T	T	A	A	T	C	A	G	T	G	T	G	T	A	A	C	A	T	T	A	G	G	G	A	G	G	A	C	T	T	G	A	A	A	G	A	G	C	C	A	C
394	Delta	>150275|29623|29851	C	A	A	T	C	T	T	T	A	A	T	C	A	G	T	G	T	G	T	A	A	C	A	T	T	A	G	G	G	A	G	G	A	C	T	T	G	A	A	A	G	A	G	C	C	A	C
395	Delta	>150155|29674|29902	C	A	A	T	C	T	T	T	A	A	T	C	A	G	T	G	T	G	T	A	A	C	A	T	T	A	G	G	G	A	G	G	A	C	T	T	G	A	A	A	G	A	G	C	C	A	C
396	Delta	>149300|29631|29859	C	A	A	T	C	T	T	T	A	A	T	C	A	G	T	G	T	G	T	A	A	C	A	T	T	A	G	G	G	A	G	G	A	C	T	T	G	A	A	A	G	A	G	C	C	A	C
397	Delta	>149299|29641|29869	C	A	A	T	C	T	T	T	A	A	T	C	A	G	T	G	T	G	T	A	A	C	A	T	T	A	G	G	G	A	G	G	A	C	T	T	G	A	A	A	G	A	G	C	C	A	C
398	Delta	>149284|29674|29902	C	A	A	T	C	T	T	T	A	A	T	C	A	G	T	G	T	G	T	A	A	C	A	T	T	A	G	G	G	A	G	G	A	C	T	T	G	A	A	A	G	A	G	C	C	A	C
399	Delta	>149283|29675|29903	C	A	A	T	C	T	T	T	A	A	T	C	A	G	T	G	T	G	T	A	A	C	A	T	T	A	G	G	G	A	G	G	A	C	T	T	G	A	A	A	G	A	G	C	C	A	C
400	Delta	>149008|29626|29854	C	A	A	T	C	T	T	T	A	A	T	C	A	G	T	G	T	G	T	A	A	C	A	T	T	A	G	G	G	A	G	G	A	C	T	T	G	A	A	A	G	A	G	C	C	A	C
401	Delta	>148862|29630|29858	C	A	A	T	C	T	T	T	A	A	T	C	A	G	T	G	T	G	T	A	A	C	A	T	T	A	G	G	G	A	G	G	A	C	T	T	G	A	A	A	G	A	G	C	C	A	C
402	Delta	>148851|29632|29860	C	A	A	T	C	T	T	T	A	A	T	C	A	G	T	G	T	G	T	A	A	C	A	T	T	A	G	G	G	A	G	G	A	C	T	T	G	A	A	A	G	A	G	C	C	A	C
403	Delta	>148515|29659|29887	C	A	A	T	C	T	T	T	A	A	T	C	A	G	T	G	T	G	T	A	A	C	A	T	T	A	G	G	G	A	G	G	A	C	T	T	G	A	A	A	G	A	G	C	C	A	C
404	Delta	>148246|29636|29864	C	A	A	T	C	T	T	T	A	A	T	C	A	G	T	G	T	G	T	A	A	C	A	T	T	A	G	G	G	A	G	G	A	C	T	T	G	A	A	A	G	A	G	C	C	A	C
405	Delta	>148245|29623|29851	C	A	A	T	C	T	T	T	A	A	T	C	A	G	T	G	T	G	T	A	A	C	A	T	T	A	G	G	G	A	G	G	A	C	T	T	G	A	A	A	G	A	G	C	C	A	C
406	Delta	>148222|29629|29857	C	A	A	T	C	T	T	T	A	A	T	C	A	G	T	G	T	G	T	A	A	C	A	T	T	A	G	G	G	A	G	G	A	C	T	T	G	A	A	A	G	A	G	C	C	A	C
407	Delta	>148221|29637|29865	C	A	A	T	C	T	T	T	A	A	T	C	A	G	T	G	T	G	T	A	A	C	A	T	T	A	G	G	G	A	G	G	A	C	T	T	G	A	A	A	G	A	G	C	C	A	C
408	Delta	>148220|29652|29880	C	A	A	T	C	T	T	T	A	A	T	C	A	G	T	G	T	G	T	A	A	C	A	T	T	A	G	G	G	A	G	G	A	C	T	T	G	A	A	A	G	A	G	C	C	A	C
409	Delta	>148132|29661|29889	C	A	A	T	C	T	T	T	A	A	T	C	A	G	T	G	T	G	T	A	A	C	A	T	T	A	G	G	G	A	G	G	A	C	T	T	G	A	A	A	G	A	G	C	C	A	C
410	Delta	>148118|29646|29874	C	A	A	T	C	T	T	T	A	A	T	C	A	G	T	G	T	G	T	A	A	C	A	T	T	A	G	G	G	A	G	G	A	C	T	T	G	A	A	A	G	A	G	C	C	A	C
411	Delta	>148117|29620|29848	C	A	A	T	C	T	T	T	A	A	T	C	A	G	T	G	T	G	T	A	A	C	A	T	T	A	G	G	G	A	G	G	A	C	T	T	G	A	A	A	G	A	G	C	C	A	C
412	Delta	>147966|29660|29888	C	A	A	T	C	T	T	T	A	A	T	C	A	G	T	G	T	G	T	A	A	C	A	T	T	A	G	G	G	A	G	G	A	C	T	T	G	A	A	A	G	A	G	C	C	A	C
413	Delta	>147886|29654|29882	C	A	A	T	C	T	T	T	A	A	T	C	A	G	T	G	T	G	T	A	A	C	A	T	T	A	G	G	G	A	G	G	A	C	T	T	G	A	A	A	G	A	G	C	C	A	C
414	Delta	>147560|29669|29897	C	A	A	T	C	T	T	T	A	A	T	C	A	G	T	G	T	G	T	A	A	C	A	T	T	A	G	G	G	A	G	G	A	C	T	T	G	A	A	A	G	A	G	C	C	A	C
415	Delta	>147457|29660|29888	C	A	A	T	C	T	T	T	A	A	T	C	A	G	T	G	T	G	T	A	A	C	A	T	T	A	G	G	G	A	G	G	A	C	T	T	G	A	A	A	G	A	G	C	C	A	C
416	Delta	>147455|29652|29880	C	A	A	T	C	T	T	T	A	A	T	C	A	G	T	G	T	G	T	A	A	C	A	T	T	A	G	G	G	A	G	G	A	C	T	T	G	A	A	A	G	A	G	C	C	A	C
417	Delta	>147451|29660|29888	C	A	A	T	C	T	T	T	A	A	T	C	A	G	T	G	T	G	T	A	A	C	A	T	T	A	G	G	G	A	G	G	A	C	T	T	G	A	A	A	G	A	G	C	C	A	C
418	Delta	>147447|29659|29887	C	A	A	T	C	T	T	T	A	A	T	C	A	G	T	G	T	G	T	A	A	C	A	T	T	A	G	G	G	A	G	G	A	C	T	T	G	A	A	A	G	A	G	C	C	A	C
419	Delta	>147440|29624|29852	C	A	A	T	C	T	T	T	A	A	T	C	A	G	T	G	T	G	T	A	A	C	A	T	T	A	G	G	G	A	G	G	A	C	T	T	G	A	A	A	G	A	G	C	C	A	C
420	Delta	>147435|29652|29880	C	A	A	T	C	T	T	T	A	A	T	C	A	G	T	G	T	G	T	A	A	C	A	T	T	A	G	G	G	A	G	G	A	C	T	T	G	A	A	A	G	A	G	C	C	A	C
421	Delta	>147432|29625|29853	C	A	A	T	C	T	T	T	A	A	T	C	A	G	T	G	T	G	T	A	A	C	A	T	T	A	G	G	G	A	G	G	A	C	T	T	G	A	A	A	G	A	G	C	C	A	C
422	Delta	>147199|29652|29880	C	A	A	T	C	T	T	T	A	A	T	C	A	G	T	G	T	G	T	A	A	C	A	T	T	A	G	G	G	A	G	G	A	C	T	T	G	A	A	A	G	A	G	C	C	A	C
423	Delta	>147193|29646|29874	C	A	A	T	C	T	T	T	A	A	T	C	A	G	T	G	T	G	T	A	A	C	A	T	T	A	G	G	G	A	G	G	A	C	T	T	G	A	A	A	G	A	G	C	C	A	C
424	Delta	>147176|29660|29888	C	A	A	T	C	T	T	T	A	A	T	C	A	G	T	G	T	G	T	A	A	C	A	T	T	A	G	G	G	A	G	G	A	C	T	T	G	A	A	A	G	A	G	C	C	A	C
425	Delta	>147156|29652|29880	C	A	A	T	C	T	T	T	A	A	T	C	A	G	T	G	T	G	T	A	A	C	A	T	T	A	G	G	G	A	G	G	A	C	T	T	G	A	A	A	G	A	G	C	C	A	C
426	Delta	>147138|29658|29886	C	A	A	T	C	T	T	T	A	A	T	C	A	G	T	G	T	G	T	A	A	C	A	T	T	A	G	G	G	A	G	G	A	C	T	T	G	A	A	A	G	A	G	C	C	A	C
427	Delta	>147127|29660|29888	C	A	A	T	C	T	T	T	A	A	T	C	A	G	T	G	T	G	T	A	A	C	A	T	T	A	G	G	G	A	G	G	A	C	T	T	G	A	A	A	G	A	G	C	C	A	C
428	Delta	>147078|29655|29883	C	A	A	T	C	T	T	T	A	A	T	C	A	G	T	G	T	G	T	A	A	C	A	T	T	A	G	G	G	A	G	G	A	C	T	T	G	A	A	A	G	A	G	C	C	A	C
429	Delta	>147077|29658|29886	C	A	A	T	C	T	T	T	A	A	T	C	A	G	T	G	T	G	T	A	A	C	A	T	T	A	G	G	G	A	G	G	A	C	T	T	G	A	A	A	G	A	G	C	C	A	C
430	Delta	>147074|29658|29886	C	A	A	T	C	T	T	T	A	A	T	C	A	G	T	G	T	G	T	A	A	C	A	T	T	A	G	G	G	A	G	G	A	C	T	T	G	A	A	A	G	A	G	C	C	A	C
431	Delta	>146990|29660|29888	C	A	A	T	C	T	T	T	A	A	T	C	A	G	T	G	T	G	T	A	A	C	A	T	T	A	G	G	G	A	G	G	A	C	T	T	G	A	A	A	G	A	G	C	C	A	C
432	Delta	>146961|29647|29875	C	A	A	T	C	T	T	T	A	A	T	C	A	G	T	G	T	G	T	A	A	C	A	T	T	A	G	G	G	A	G	G	A	C	T	T	G	A	A	A	G	A	G	C	C	A	C
433	Delta	>146912|29654|29882	C	A	A	T	C	T	T	T	A	A	T	C	A	G	T	G	T	G	T	A	A	C	A	T	T	A	G	G	G	A	G	G	A	C	T	T	G	A	A	A	G	A	G	C	C	A	C
434	Delta	>146803|29646|29874	C	A	A	T	C	T	T	T	A	A	T	C	A	G	T	G	T	G	T	A	A	C	A	T	T	A	G	G	G	A	G	G	A	C	T	T	G	A	A	A	G	A	G	C	C	A	C
435	Delta	>146726|29625|29853	C	A	A	T	C	T	T	T	A	A	T	C	A	G	T	G	T	G	T	A	A	C	A	T	T	A	G	G	G	A	G	G	A	C	T	T	G	A	A	A	G	A	G	C	C	A	C
436	Delta	>146498|29647|29875	C	A	A	T	C	T	T	T	A	A	T	C	A	G	T	G	T	G	T	A	A	C	A	T	T	A	G	G	G	A	G	G	A	C	T	T	G	A	A	A	G	A	G	C	C	A	C
437	Delta	>146441|29660|29888	C	A	A	T	C	T	T	T	A	A	T	C	A	G	T	G	T	G	T	A	A	C	A	T	T	A	G	G	G	A	G	G	A	C	T	T	G	A	A	A	G	A	G	C	C	A	C
438	Delta	>146440|29651|29879	C	A	A	T	C	T	T	T	A	A	T	C	A	G	T	G	T	G	T	A	A	C	A	T	T	A	G	G	G	A	G	G	A	C	T	T	G	A	A	A	G	A	G	C	C	A	C
439	Delta	>146437|29652|29880	C	A	A	T	C	T	T	T	A	A	T	C	A	G	T	G	T	G	T	A	A	C	A	T	T	A	G	G	G	A	G	G	A	C	T	T	G	A	A	A	G	A	G	C	C	A	C
440	Delta	>146436|29654|29882	C	A	A	T	C	T	T	T	A	A	T	C	A	G	T	G	T	G	T	A	A	C	A	T	T	A	G	G	G	A	G	G	A	C	T	T	G	A	A	A	G	A	G	C	C	A	C
441	Delta	>146433|29658|29886	C	A	A	T	C	T	T	T	A	A	T	C	A	G	T	G	T	G	T	A	A	C	A	T	T	A	G	G	G	A	G	G	A	C	T	T	G	A	A	A	G	A	G	C	C	A	C
442	Delta	>146429|29658|29886	C	A	A	T	C	T	T	T	A	A	T	C	A	G	T	G	T	G	T	A	A	C	A	T	T	A	G	G	G	A	G	G	A	C	T	T	G	A	A	A	G	A	G	C	C	A	C
443	Delta	>146427|29655|29883	C	A	A	T	C	T	T	T	A	A	T	C	A	G	T	G	T	G	T	A	A	C	A	T	T	A	G	G	G	A	G	G	A	C	T	T	G	A	A	A	G	A	G	C	C	A	C
444	Delta	>146418|29657|29885	C	A	A	T	C	T	T	T	A	A	T	C	A	G	T	G	T	G	T	A	A	C	A	T	T	A	G	G	G	A	G	G	A	C	T	T	G	A	A	A	G	A	G	C	C	A	C
445	Delta	>146413|29654|29882	C	A	A	T	C	T	T	T	A	A	T	C	A	G	T	G	T	G	T	A	A	C	A	T	T	A	G	G	G	A	G	G	A	C	T	T	G	A	A	A	G	A	G	C	C	A	C
446	Delta	>146404|29658|29886	C	A	A	T	C	T	T	T	A	A	T	C	A	G	T	G	T	G	T	A	A	C	A	T	T	A	G	G	G	A	G	G	A	C	T	T	G	A	A	A	G	A	G	C	C	A	C
447	Delta	>146398|29658|29886	C	A	A	T	C	T	T	T	A	A	T	C	A	G	T	G	T	G	T	A	A	C	A	T	T	A	G	G	G	A	G	G	A	C	T	T	G	A	A	A	G	A	G	C	C	A	C
448	Delta	>146395|29655|29883	C	A	A	T	C	T	T	T	A	A	T	C	A	G	T	G	T	G	T	A	A	C	A	T	T	A	G	G	G	A	G	G	A	C	T	T	G	A	A	A	G	A	G	C	C	A	C
449	Delta	>146389|29651|29879	C	A	A	T	C	T	T	T	A	A	T	C	A	G	T	G	T	G	T	A	A	C	A	T	T	A	G	G	G	A	G	G	A	C	T	T	G	A	A	A	G	A	G	C	C	A	C
450	Delta	>146385|29655|29883	C	A	A	T	C	T	T	T	A	A	T	C	A	G	T	G	T	G	T	A	A	C	A	T	T	A	G	G	G	A	G	G	A	C	T	T	G	A	A	A	G	A	G	C	C	A	C
451	Delta	>146378|29658|29886	C	A	A	T	C	T	T	T	A	A	T	C	A	G	T	G	T	G	T	A	A	C	A	T	T	A	G	G	G	A	G	G	A	C	T	T	G	A	A	A	G	A	G	C	C	A	C
452	Delta	>146377|29660|29888	C	A	A	T	C	T	T	T	A	A	T	C	A	G	T	G	T	G	T	A	A	C	A	T	T	A	G	G	G	A	G	G	A	C	T	T	G	A	A	A	G	A	G	C	C	A	C
453	Delta	>146357|29624|29852	C	A	A	T	C	T	T	T	A	A	T	C	A	G	T	G	T	G	T	A	A	C	A	T	T	A	G	G	G	A	G	G	A	C	T	T	G	A	A	A	G	A	G	C	C	A	C
454	Delta	>146128|29626|29854	C	A	A	T	C	T	T	T	A	A	T	C	A	G	T	G	T	G	T	A	A	C	A	T	T	A	G	G	G	A	G	G	A	C	T	T	G	A	A	A	G	A	G	C	C	A	C
455	Delta	>146060|29660|29888	C	A	A	T	C	T	T	T	A	A	T	C	A	G	T	G	T	G	T	A	A	C	A	T	T	A	G	G	G	A	G	G	A	C	T	T	G	A	A	A	G	A	G	C	C	A	C
456	Delta	>146059|29659|29887	C	A	A	T	C	T	T	T	A	A	T	C	A	G	T	G	T	G	T	A	A	C	A	T	T	A	G	G	G	A	G	G	A	C	T	T	G	A	A	A	G	A	G	C	C	A	C
457	Delta	>145951|29656|29884	C	A	A	T	C	T	T	T	A	A	T	C	A	G	T	G	T	G	T	A	A	C	A	T	T	A	G	G	G	A	G	G	A	C	T	T	G	A	A	A	G	A	G	C	C	A	C
458	Delta	>145940|29655|29883	C	A	A	T	C	T	T	T	A	A	T	C	A	G	T	G	T	G	T	A	A	C	A	T	T	A	G	G	G	A	G	G	A	C	T	T	G	A	A	A	G	A	G	C	C	A	C
459	Delta	>145938|29652|29880	C	A	A	T	C	T	T	T	A	A	T	C	A	G	T	G	T	G	T	A	A	C	A	T	T	A	G	G	G	A	G	G	A	C	T	T	G	A	A	A	G	A	G	C	C	A	C
460	Delta	>145878|29660|29888	C	A	A	T	C	T	T	T	A	A	T	C	A	G	T	G	T	G	T	A	A	C	A	T	T	A	G	G	G	A	G	G	A	C	T	T	G	A	A	A	G	A	G	C	C	A	C
461	Delta	>145871|29661|29889	C	A	A	T	C	T	T	T	A	A	T	C	A	G	T	G	T	G	T	A	A	C	A	T	T	A	G	G	G	A	G	G	A	C	T	T	G	A	A	A	G	A	G	C	C	A	C
462	Delta	>145840|29654|29882	C	A	A	T	C	T	T	T	A	A	T	C	A	G	T	G	T	G	T	A	A	C	A	T	T	A	G	G	G	A	G	G	A	C	T	T	G	A	A	A	G	A	G	C	C	A	C
463	Delta	>145791|29655|29883	C	A	A	T	C	T	T	T	A	A	T	C	A	G	T	G	T	G	T	A	A	C	A	T	T	A	G	G	G	A	G	G	A	C	T	T	G	A	A	A	G	A	G	C	C	A	C
464	Delta	>145757|29661|29889	C	A	A	T	C	T	T	T	A	A	T	C	A	G	T	G	T	G	T	A	A	C	A	T	T	A	G	G	G	A	G	G	A	C	T	T	G	A	A	A	G	A	G	C	C	A	C
465	Delta	>145755|29660|29888	C	A	A	T	C	T	T	T	A	A	T	C	A	G	T	G	T	G	T	A	A	C	A	T	T	A	G	G	G	A	G	G	A	C	T	T	G	A	A	A	G	A	G	C	C	A	C
466	Delta	>145753|29658|29886	C	A	A	T	C	T	T	T	A	A	T	C	A	G	T	G	T	G	T	A	A	C	A	T	T	A	G	G	G	A	G	G	A	C	T	T	G	A	A	A	G	A	G	C	C	A	C
467	Delta	>145750|29625|29853	C	A	A	T	C	T	T	T	A	A	T	C	A	G	T	G	T	G	T	A	A	C	A	T	T	A	G	G	G	A	G	G	A	C	T	T	G	A	A	A	G	A	G	C	C	A	C
468	Delta	>145744|29661|29889	C	A	A	T	C	T	T	T	A	A	T	C	A	G	T	G	T	G	T	A	A	C	A	T	T	A	G	G	G	A	G	G	A	C	T	T	G	A	A	A	G	A	G	C	C	A	C
469	Delta	>145736|29635|29863	C	A	A	T	C	T	T	T	A	A	T	C	A	G	T	G	T	G	T	A	A	C	A	T	T	A	G	G	G	A	G	G	A	C	T	T	G	A	A	A	G	A	G	C	C	A	C
470	Delta	>145734|29660|29888	C	A	A	T	C	T	T	T	A	A	T	C	A	G	T	G	T	G	T	A	A	C	A	T	T	A	G	G	G	A	G	G	A	C	T	T	G	A	A	A	G	A	G	C	C	A	C
471	Delta	>145733|29646|29874	C	A	A	T	C	T	T	T	A	A	T	C	A	G	T	G	T	G	T	A	A	C	A	T	T	A	G	G	G	A	G	G	A	C	T	T	G	A	A	A	G	A	G	C	C	A	C
472	Delta	>145732|29646|29874	C	A	A	T	C	T	T	T	A	A	T	C	A	G	T	G	T	G	T	A	A	C	A	T	T	A	G	G	G	A	G	G	A	C	T	T	G	A	A	A	G	A	G	C	C	A	C
473	Delta	>145724|29660|29888	C	A	A	T	C	T	T	T	A	A	T	C	A	G	T	G	T	G	T	A	A	C	A	T	T	A	G	G	G	A	G	G	A	C	T	T	G	A	A	A	G	A	G	C	C	A	C
474	Delta	>145715|29655|29883	C	A	A	T	C	T	T	T	A	A	T	C	A	G	T	G	T	G	T	A	A	C	A	T	T	A	G	G	G	A	G	G	A	C	T	T	G	A	A	A	G	A	G	C	C	A	C
475	Delta	>145714|29646|29874	C	A	A	T	C	T	T	T	A	A	T	C	A	G	T	G	T	G	T	A	A	C	A	T	T	A	G	G	G	A	G	G	A	C	T	T	G	A	A	A	G	A	G	C	C	A	C
476	Delta	>145711|29662|29890	C	A	A	T	C	T	T	T	A	A	T	C	A	G	T	G	T	G	T	A	A	C	A	T	T	A	G	G	G	A	G	G	A	C	T	T	G	A	A	A	G	A	G	C	C	A	C
477	Delta	>145313|29660|29888	C	A	A	T	C	T	T	T	A	A	T	C	A	G	T	G	T	G	T	A	A	C	A	T	T	A	G	G	G	A	G	G	A	C	T	T	G	A	A	A	G	A	G	C	C	A	C
478	Delta	>145301|29656|29884	C	A	A	T	C	T	T	T	A	A	T	C	A	G	T	G	T	G	T	A	A	C	A	T	T	A	G	G	G	A	G	G	A	C	T	T	G	A	A	A	G	A	G	C	C	A	C
479	Delta	>145227|29662|29890	C	A	A	T	C	T	T	T	A	A	T	C	A	G	T	G	T	G	T	A	A	C	A	T	T	A	G	G	G	A	G	G	A	C	T	T	G	A	A	A	G	A	G	C	C	A	C
480	Delta	>145224|29661|29889	C	A	A	T	C	T	T	T	A	A	T	C	A	G	T	G	T	G	T	A	A	C	A	T	T	A	G	G	G	A	G	G	A	C	T	T	G	A	A	A	G	A	G	C	C	A	C
481	Delta	>145222|29627|29855	C	A	A	T	C	T	T	T	A	A	T	C	A	G	T	G	T	G	T	A	A	C	A	T	T	A	G	G	G	A	G	G	A	C	T	T	G	A	A	A	G	A	G	C	C	A	C
482	Delta	>145208|29662|29890	C	A	A	T	C	T	T	T	A	A	T	C	A	G	T	G	T	G	T	A	A	C	A	T	T	A	G	G	G	A	G	G	A	C	T	T	G	A	A	A	G	A	G	C	C	A	C
483	Delta	>145202|29660|29888	C	A	A	T	C	T	T	T	A	A	T	C	A	G	T	G	T	G	T	A	A	C	A	T	T	A	G	G	G	A	G	G	A	C	T	T	G	A	A	A	G	A	G	C	C	A	C
484	Delta	>145197|29654|29882	C	A	A	T	C	T	T	T	A	A	T	C	A	G	T	G	T	G	T	A	A	C	A	T	T	A	G	G	G	A	G	G	A	C	T	T	G	A	A	A	G	A	G	C	C	A	C
485	Delta	>145196|29654|29882	C	A	A	T	C	T	T	T	A	A	T	C	A	G	T	G	T	G	T	A	A	C	A	T	T	A	G	G	G	A	G	G	A	C	T	T	G	A	A	A	G	A	G	C	C	A	C
486	Delta	>145191|29655|29883	C	A	A	T	C	T	T	T	A	A	T	C	A	G	T	G	T	G	T	A	A	C	A	T	T	A	G	G	G	A	G	G	A	C	T	T	G	A	A	A	G	A	G	C	C	A	C
487	Delta	>145189|29658|29886	C	A	A	T	C	T	T	T	A	A	T	C	A	G	T	G	T	G	T	A	A	C	A	T	T	A	G	G	G	A	G	G	A	C	T	T	G	A	A	A	G	A	G	C	C	A	C
488	Delta	>145188|29661|29889	C	A	A	T	C	T	T	T	A	A	T	C	A	G	T	G	T	G	T	A	A	C	A	T	T	A	G	G	G	A	G	G	A	C	T	T	G	A	A	A	G	A	G	C	C	A	C
489	Delta	>145185|29626|29854	C	A	A	T	C	T	T	T	A	A	T	C	A	G	T	G	T	G	T	A	A	C	A	T	T	A	G	G	G	A	G	G	A	C	T	T	G	A	A	A	G	A	G	C	C	A	C
490	Delta	>145183|29631|29859	C	A	A	T	C	T	T	T	A	A	T	C	A	G	T	G	T	G	T	A	A	C	A	T	T	A	G	G	G	A	G	G	A	C	T	T	G	A	A	A	G	A	G	C	C	A	C
491	Delta	>145072|29658|29886	C	A	A	T	C	T	T	T	A	A	T	C	A	G	T	G	T	G	T	A	A	C	A	T	T	A	G	G	G	A	G	G	A	C	T	T	G	A	A	A	G	A	G	C	C	A	C
492	Delta	>145068|29631|29859	C	A	A	T	C	T	T	T	A	A	T	C	A	G	T	G	T	G	T	A	A	C	A	T	T	A	G	G	G	A	G	G	A	C	T	T	G	A	A	A	G	A	G	C	C	A	C
493	Delta	>144913|29660|29888	C	A	A	T	C	T	T	T	A	A	T	C	A	G	T	G	T	G	T	A	A	C	A	T	T	A	G	G	G	A	G	G	A	C	T	T	G	A	A	A	G	A	G	C	C	A	C
494	Delta	>144907|29661|29889	C	A	A	T	C	T	T	T	A	A	T	C	A	G	T	G	T	G	T	A	A	C	A	T	T	A	G	G	G	A	G	G	A	C	T	T	G	A	A	A	G	A	G	C	C	A	C
495	Delta	>144905|29662|29890	C	A	A	T	C	T	T	T	A	A	T	C	A	G	T	G	T	G	T	A	A	C	A	T	T	A	G	G	G	A	G	G	A	C	T	T	G	A	A	A	G	A	G	C	C	A	C
496	Delta	>144901|29662|29890	C	A	A	T	C	T	T	T	A	A	T	C	A	G	T	G	T	G	T	A	A	C	A	T	T	A	G	G	G	A	G	G	A	C	T	T	G	A	A	A	G	A	G	C	C	A	C
497	Delta	>144900|29660|29888	C	A	A	T	C	T	T	T	A	A	T	C	A	G	T	G	T	G	T	A	A	C	A	T	T	A	G	G	G	A	G	G	A	C	T	T	G	A	A	A	G	A	G	C	C	A	C
498	Delta	>144887|29625|29853	C	A	A	T	C	T	T	T	A	A	T	C	A	G	T	G	T	G	T	A	A	C	A	T	T	A	G	G	G	A	G	G	A	C	T	T	G	A	A	A	G	A	G	C	C	A	C
499	Delta	>144883|29660|29888	C	A	A	T	C	T	T	T	A	A	T	C	A	G	T	G	T	G	T	A	A	C	A	T	T	A	G	G	G	A	G	G	A	C	T	T	G	A	A	A	G	A	G	C	C	A	C
500	Delta	>144861|29654|29882	C	A	A	T	C	T	T	T	A	A	T	C	A	G	T	G	T	G	T	A	A	C	A	T	T	A	G	G	G	A	G	G	A	C	T	T	G	A	A	A	G	A	G	C	C	A	C
501	Delta	>144817|29661|29889	C	A	A	T	C	T	T	T	A	A	T	C	A	G	T	G	T	G	T	A	A	C	A	T	T	A	G	G	G	A	G	G	A	C	T	T	G	A	A	A	G	A	G	C	C	A	C
502	Delta	>144738|29626|29854	C	A	A	T	C	T	T	T	A	A	T	C	A	G	T	G	T	G	T	A	A	C	A	T	T	A	G	G	G	A	G	G	A	C	T	T	G	A	A	A	G	A	G	C	C	A	C
503	Delta	>144645|29659|29887	C	A	A	T	C	T	T	T	A	A	T	C	A	G	T	G	T	G	T	A	A	C	A	T	T	A	G	G	G	A	G	G	A	C	T	T	G	A	A	A	G	A	G	C	C	A	C
504	Delta	>144625|29624|29852	C	A	A	T	C	T	T	T	A	A	T	C	A	G	T	G	T	G	T	A	A	C	A	T	T	A	G	G	G	A	G	G	A	C	T	T	G	A	A	A	G	A	G	C	C	A	C
505	Delta	>144621|29624|29852	C	A	A	T	C	T	T	T	A	A	T	C	A	G	T	G	T	G	T	A	A	C	A	T	T	A	G	G	G	A	G	G	A	C	T	T	G	A	A	A	G	A	G	C	C	A	C
506	Delta	>144597|29661|29889	C	A	A	T	C	T	T	T	A	A	T	C	A	G	T	G	T	G	T	A	A	C	A	T	T	A	G	G	G	A	G	G	A	C	T	T	G	A	A	A	G	A	G	C	C	A	C
507	Delta	>144588|29624|29852	C	A	A	T	C	T	T	T	A	A	T	C	A	G	T	G	T	G	T	A	A	C	A	T	T	A	G	G	G	A	G	G	A	C	T	T	G	A	A	A	G	A	G	C	C	A	C
508	Delta	>144584|29660|29888	C	A	A	T	C	T	T	T	A	A	T	C	A	G	T	G	T	G	T	A	A	C	A	T	T	A	G	G	G	A	G	G	A	C	T	T	G	A	A	A	G	A	G	C	C	A	C
509	Delta	>144412|29660|29888	C	A	A	T	C	T	T	T	A	A	T	C	A	G	T	G	T	G	T	A	A	C	A	T	T	A	G	G	G	A	G	G	A	C	T	T	G	A	A	A	G	A	G	C	C	A	C
510	Delta	>144406|29660|29888	C	A	A	T	C	T	T	T	A	A	T	C	A	G	T	G	T	G	T	A	A	C	A	T	T	A	G	G	G	A	G	G	A	C	T	T	G	A	A	A	G	A	G	C	C	A	C
511	Delta	>144403|29651|29879	C	A	A	T	C	T	T	T	A	A	T	C	A	G	T	G	T	G	T	A	A	C	A	T	T	A	G	G	G	A	G	G	A	C	T	T	G	A	A	A	G	A	G	C	C	A	C
512	Delta	>144395|29660|29888	C	A	A	T	C	T	T	T	A	A	T	C	A	G	T	G	T	G	T	A	A	C	A	T	T	A	G	G	G	A	G	G	A	C	T	T	G	A	A	A	G	A	G	C	C	A	C
513	Delta	>144393|29659|29887	C	A	A	T	C	T	T	T	A	A	T	C	A	G	T	G	T	G	T	A	A	C	A	T	T	A	G	G	G	A	G	G	A	C	T	T	G	A	A	A	G	A	G	C	C	A	C
514	Delta	>144392|29653|29881	C	A	A	T	C	T	T	T	A	A	T	C	A	G	T	G	T	G	T	A	A	C	A	T	T	A	G	G	G	A	G	G	A	C	T	T	G	A	A	A	G	A	G	C	C	A	C
515	Delta	>144384|29660|29888	C	A	A	T	C	T	T	T	A	A	T	C	A	G	T	G	T	G	T	A	A	C	A	T	T	A	G	G	G	A	G	G	A	C	T	T	G	A	A	A	G	A	G	C	C	A	C
516	Delta	>144374|29661|29889	C	A	A	T	C	T	T	T	A	A	T	C	A	G	T	G	T	G	T	A	A	C	A	T	T	A	G	G	G	A	G	G	A	C	T	T	G	A	A	A	G	A	G	C	C	A	C
517	Delta	>144372|29662|29890	C	A	A	T	C	T	T	T	A	A	T	C	A	G	T	G	T	G	T	A	A	C	A	T	T	A	G	G	G	A	G	G	A	C	T	T	G	A	A	A	G	A	G	C	C	A	C
518	Delta	>144370|29645|29873	C	A	A	T	C	T	T	T	A	A	T	C	A	G	T	G	T	G	T	A	A	C	A	T	T	A	G	G	G	A	G	G	A	C	T	T	G	A	A	A	G	A	G	C	C	A	C
519	Delta	>144165|29661|29889	C	A	A	T	C	T	T	T	A	A	T	C	A	G	T	G	T	G	T	A	A	C	A	T	T	A	G	G	G	A	G	G	A	C	T	T	G	A	A	A	G	A	G	C	C	A	C
520	Delta	>144164|29660|29888	C	A	A	T	C	T	T	T	A	A	T	C	A	G	T	G	T	G	T	A	A	C	A	T	T	A	G	G	G	A	G	G	A	C	T	T	G	A	A	A	G	A	G	C	C	A	C
521	Delta	>144162|29658|29886	C	A	A	T	C	T	T	T	A	A	T	C	A	G	T	G	T	G	T	A	A	C	A	T	T	A	G	G	G	A	G	G	A	C	T	T	G	A	A	A	G	A	G	C	C	A	C
522	Delta	>144159|29660|29888	C	A	A	T	C	T	T	T	A	A	T	C	A	G	T	G	T	G	T	A	A	C	A	T	T	A	G	G	G	A	G	G	A	C	T	T	G	A	A	A	G	A	G	C	C	A	C
523	Delta	>144144|29660|29888	C	A	A	T	C	T	T	T	A	A	T	C	A	G	T	G	T	G	T	A	A	C	A	T	T	A	G	G	G	A	G	G	A	C	T	T	G	A	A	A	G	A	G	C	C	A	C
524	Delta	>144142|29654|29882	C	A	A	T	C	T	T	T	A	A	T	C	A	G	T	G	T	G	T	A	A	C	A	T	T	A	G	G	G	A	G	G	A	C	T	T	G	A	A	A	G	A	G	C	C	A	C
525	Delta	>143820|29662|29890	C	A	A	T	C	T	T	T	A	A	T	C	A	G	T	G	T	G	T	A	A	C	A	T	T	A	G	G	G	A	G	G	A	C	T	T	G	A	A	A	G	A	G	C	C	A	C
526	Delta	>143819|29662|29890	C	A	A	T	C	T	T	T	A	A	T	C	A	G	T	G	T	G	T	A	A	C	A	T	T	A	G	G	G	A	G	G	A	C	T	T	G	A	A	A	G	A	G	C	C	A	C
527	Delta	>143760|29663|29891	C	A	A	T	C	T	T	T	A	A	T	C	A	G	T	G	T	G	T	A	A	C	A	T	T	A	G	G	G	A	G	G	A	C	T	T	G	A	A	A	G	A	G	C	C	A	C
528	Delta	>143759|29663|29891	C	A	A	T	C	T	T	T	A	A	T	C	A	G	T	G	T	G	T	A	A	C	A	T	T	A	G	G	G	A	G	G	A	C	T	T	G	A	A	A	G	A	G	C	C	A	C
529	Delta	>143758|29662|29890	C	A	A	T	C	T	T	T	A	A	T	C	A	G	T	G	T	G	T	A	A	C	A	T	T	A	G	G	G	A	G	G	A	C	T	T	G	A	A	A	G	A	G	C	C	A	C
530	Delta	>143757|29662|29890	C	A	A	T	C	T	T	T	A	A	T	C	A	G	T	G	T	G	T	A	A	C	A	T	T	A	G	G	G	A	G	G	A	C	T	T	G	A	A	A	G	A	G	C	C	A	C
531	Delta	>143756|29662|29890	C	A	A	T	C	T	T	T	A	A	T	C	A	G	T	G	T	G	T	A	A	C	A	T	T	A	G	G	G	A	G	G	A	C	T	T	G	A	A	A	G	A	G	C	C	A	C
532	Delta	>143755|29662|29890	C	A	A	T	C	T	T	T	A	A	T	C	A	G	T	G	T	G	T	A	A	C	A	T	T	A	G	G	G	A	G	G	A	C	T	T	G	A	A	A	G	A	G	C	C	A	C
533	Delta	>143754|29653|29881	C	A	A	T	C	T	T	T	A	A	T	C	A	G	T	G	T	G	T	A	A	C	A	T	T	A	G	G	G	A	G	G	A	C	T	T	G	A	A	A	G	A	G	C	C	A	C
534	Delta	>143753|29662|29890	C	A	A	T	C	T	T	T	A	A	T	C	A	G	T	G	T	G	T	A	A	C	A	T	T	A	G	G	G	A	G	G	A	C	T	T	G	A	A	A	G	A	G	C	C	A	C
535	Delta	>143752|29662|29890	C	A	A	T	C	T	T	T	A	A	T	C	A	G	T	G	T	G	T	A	A	C	A	T	T	A	G	G	G	A	G	G	A	C	T	T	G	A	A	A	G	A	G	C	C	A	C
536	Delta	>143751|29662|29890	C	A	A	T	C	T	T	T	A	A	T	C	A	G	T	G	T	G	T	A	A	C	A	T	T	A	G	G	G	A	G	G	A	C	T	T	G	A	A	A	G	A	G	C	C	A	C
537	Delta	>143749|29662|29890	C	A	A	T	C	T	T	T	A	A	T	C	A	G	T	G	T	G	T	A	A	C	A	T	T	A	G	G	G	A	G	G	A	C	T	T	G	A	A	A	G	A	G	C	C	A	C
538	Delta	>143748|29668|29896	C	A	A	T	C	T	T	T	A	A	T	C	A	G	T	G	T	G	T	A	A	C	A	T	T	A	G	G	G	A	G	G	A	C	T	T	G	A	A	A	G	A	G	C	C	A	C
539	Delta	>143747|29662|29890	C	A	A	T	C	T	T	T	A	A	T	C	A	G	T	G	T	G	T	A	A	C	A	T	T	A	G	G	G	A	G	G	A	C	T	T	G	A	A	A	G	A	G	C	C	A	C
540	Delta	>143746|29662|29890	C	A	A	T	C	T	T	T	A	A	T	C	A	G	T	G	T	G	T	A	A	C	A	T	T	A	G	G	G	A	G	G	A	C	T	T	G	A	A	A	G	A	G	C	C	A	C
541	Delta	>143745|29662|29890	C	A	A	T	C	T	T	T	A	A	T	C	A	G	T	G	T	G	T	A	A	C	A	T	T	A	G	G	G	A	G	G	A	C	T	T	G	A	A	A	G	A	G	C	C	A	C
542	Delta	>143744|29662|29890	C	A	A	T	C	T	T	T	A	A	T	C	A	G	T	G	T	G	T	A	A	C	A	T	T	A	G	G	G	A	G	G	A	C	T	T	G	A	A	A	G	A	G	C	C	A	C
543	Delta	>143743|29662|29890	C	A	A	T	C	T	T	T	A	A	T	C	A	G	T	G	T	G	T	A	A	C	A	T	T	A	G	G	G	A	G	G	A	C	T	T	G	A	A	A	G	A	G	C	C	A	C
544	Delta	>143742|29662|29890	C	A	A	T	C	T	T	T	A	A	T	C	A	G	T	G	T	G	T	A	A	C	A	T	T	A	G	G	G	A	G	G	A	C	T	T	G	A	A	A	G	A	G	C	C	A	C
545	Delta	>143741|29662|29890	C	A	A	T	C	T	T	T	A	A	T	C	A	G	T	G	T	G	T	A	A	C	A	T	T	A	G	G	G	A	G	G	A	C	T	T	G	A	A	A	G	A	G	C	C	A	C
546	Delta	>143740|29662|29890	C	A	A	T	C	T	T	T	A	A	T	C	A	G	T	G	T	G	T	A	A	C	A	T	T	A	G	G	G	A	G	G	A	C	T	T	G	A	A	A	G	A	G	C	C	A	C
547	Delta	>143739|29659|29887	C	A	A	T	C	T	T	T	A	A	T	C	A	G	T	G	T	G	T	A	A	C	A	T	T	A	G	G	G	A	G	G	A	C	T	T	G	A	A	A	G	A	G	C	C	A	C
548	Delta	>143738|29662|29890	C	A	A	T	C	T	T	T	A	A	T	C	A	G	T	G	T	G	T	A	A	C	A	T	T	A	G	G	G	A	G	G	A	C	T	T	G	A	A	A	G	A	G	C	C	A	C
549	Delta	>143737|29662|29890	C	A	A	T	C	T	T	T	A	A	T	C	A	G	T	G	T	G	T	A	A	C	A	T	T	A	G	G	G	A	G	G	A	C	T	T	G	A	A	A	G	A	G	C	C	A	C
550	Delta	>143736|29662|29890	C	A	A	T	C	T	T	T	A	A	T	C	A	G	T	G	T	G	T	A	A	C	A	T	T	A	G	G	G	A	G	G	A	C	T	T	G	A	A	A	G	A	G	C	C	A	C
551	Delta	>143735|29662|29890	C	A	A	T	C	T	T	T	A	A	T	C	A	G	T	G	T	G	T	A	A	C	A	T	T	A	G	G	G	A	G	G	A	C	T	T	G	A	A	A	G	A	G	C	C	A	C
552	Delta	>143734|29662|29890	C	A	A	T	C	T	T	T	A	A	T	C	A	G	T	G	T	G	T	A	A	C	A	T	T	A	G	G	G	A	G	G	A	C	T	T	G	A	A	A	G	A	G	C	C	A	C
553	Delta	>143733|29662|29890	C	A	A	T	C	T	T	T	A	A	T	C	A	G	T	G	T	G	T	A	A	C	A	T	T	A	G	G	G	A	G	G	A	C	T	T	G	A	A	A	G	A	G	C	C	A	C
554	Delta	>143731|29662|29890	C	A	A	T	C	T	T	T	A	A	T	C	A	G	T	G	T	G	T	A	A	C	A	T	T	A	G	G	G	A	G	G	A	C	T	T	G	A	A	A	G	A	G	C	C	A	C
555	Delta	>143730|29656|29884	C	A	A	T	C	T	T	T	A	A	T	C	A	G	T	G	T	G	T	A	A	C	A	T	T	A	G	G	G	A	G	G	A	C	T	T	G	A	A	A	G	A	G	C	C	A	C
556	Delta	>143728|29662|29890	C	A	A	T	C	T	T	T	A	A	T	C	A	G	T	G	T	G	T	A	A	C	A	T	T	A	G	G	G	A	G	G	A	C	T	T	G	A	A	A	G	A	G	C	C	A	C
557	Delta	>143725|29662|29890	C	A	A	T	C	T	T	T	A	A	T	C	A	G	T	G	T	G	T	A	A	C	A	T	T	A	G	G	G	A	G	G	A	C	T	T	G	A	A	A	G	A	G	C	C	A	C
558	Delta	>143724|29662|29890	C	A	A	T	C	T	T	T	A	A	T	C	A	G	T	G	T	G	T	A	A	C	A	T	T	A	G	G	G	A	G	G	A	C	T	T	G	A	A	A	G	A	G	C	C	A	C
559	Delta	>143723|29662|29890	C	A	A	T	C	T	T	T	A	A	T	C	A	G	T	G	T	G	T	A	A	C	A	T	T	A	G	G	G	A	G	G	A	C	T	T	G	A	A	A	G	A	G	C	C	A	C
560	Delta	>143722|29662|29890	C	A	A	T	C	T	T	T	A	A	T	C	A	G	T	G	T	G	T	A	A	C	A	T	T	A	G	G	G	A	G	G	A	C	T	T	G	A	A	A	G	A	G	C	C	A	C
561	Delta	>143721|29653|29881	C	A	A	T	C	T	T	T	A	A	T	C	A	G	T	G	T	G	T	A	A	C	A	T	T	A	G	G	G	A	G	G	A	C	T	T	G	A	A	A	G	A	G	C	C	A	C
562	Delta	>143720|29653|29881	C	A	A	T	C	T	T	T	A	A	T	C	A	G	T	G	T	G	T	A	A	C	A	T	T	A	G	G	G	A	G	G	A	C	T	T	G	A	A	A	G	A	G	C	C	A	C
563	Delta	>143719|29662|29890	C	A	A	T	C	T	T	T	A	A	T	C	A	G	T	G	T	G	T	A	A	C	A	T	T	A	G	G	G	A	G	G	A	C	T	T	G	A	A	A	G	A	G	C	C	A	C
564	Delta	>143718|29659|29887	C	A	A	T	C	T	T	T	A	A	T	C	A	G	T	G	T	G	T	A	A	C	A	T	T	A	G	G	G	A	G	G	A	C	T	T	G	A	A	A	G	A	G	C	C	A	C
565	Delta	>143717|29662|29890	C	A	A	T	C	T	T	T	A	A	T	C	A	G	T	G	T	G	T	A	A	C	A	T	T	A	G	G	G	A	G	G	A	C	T	T	G	A	A	A	G	A	G	C	C	A	C
566	Delta	>143716|29662|29890	C	A	A	T	C	T	T	T	A	A	T	C	A	G	T	G	T	G	T	A	A	C	A	T	T	A	G	G	G	A	G	G	A	C	T	T	G	A	A	A	G	A	G	C	C	A	C
567	Delta	>143714|29653|29881	C	A	A	T	C	T	T	T	A	A	T	C	A	G	T	G	T	G	T	A	A	C	A	T	T	A	G	G	G	A	G	G	A	C	T	T	G	A	A	A	G	A	G	C	C	A	C
568	Delta	>143713|29662|29890	C	A	A	T	C	T	T	T	A	A	T	C	A	G	T	G	T	G	T	A	A	C	A	T	T	A	G	G	G	A	G	G	A	C	T	T	G	A	A	A	G	A	G	C	C	A	C
569	Delta	>143711|29662|29890	C	A	A	T	C	T	T	T	A	A	T	C	A	G	T	G	T	G	T	A	A	C	A	T	T	A	G	G	G	A	G	G	A	C	T	T	G	A	A	A	G	A	G	C	C	A	C
570	Delta	>143710|29662|29890	C	A	A	T	C	T	T	T	A	A	T	C	A	G	T	G	T	G	T	A	A	C	A	T	T	A	G	G	G	A	G	G	A	C	T	T	G	A	A	A	G	A	G	C	C	A	C
571	Delta	>143707|29662|29890	C	A	A	T	C	T	T	T	A	A	T	C	A	G	T	G	T	G	T	A	A	C	A	T	T	A	G	G	G	A	G	G	A	C	T	T	G	A	A	A	G	A	G	C	C	A	C
572	Delta	>143706|29662|29890	C	A	A	T	C	T	T	T	A	A	T	C	A	G	T	G	T	G	T	A	A	C	A	T	T	A	G	G	G	A	G	G	A	C	T	T	G	A	A	A	G	A	G	C	C	A	C
573	Delta	>143705|29662|29890	C	A	A	T	C	T	T	T	A	A	T	C	A	G	T	G	T	G	T	A	A	C	A	T	T	A	G	G	G	A	G	G	A	C	T	T	G	A	A	A	G	A	G	C	C	A	C
574	Delta	>143704|29662|29890	C	A	A	T	C	T	T	T	A	A	T	C	A	G	T	G	T	G	T	A	A	C	A	T	T	A	G	G	G	A	G	G	A	C	T	T	G	A	A	A	G	A	G	C	C	A	C
575	Delta	>143703|29662|29890	C	A	A	T	C	T	T	T	A	A	T	C	A	G	T	G	T	G	T	A	A	C	A	T	T	A	G	G	G	A	G	G	A	C	T	T	G	A	A	A	G	A	G	C	C	A	C
576	Delta	>143702|29662|29890	C	A	A	T	C	T	T	T	A	A	T	C	A	G	T	G	T	G	T	A	A	C	A	T	T	A	G	G	G	A	G	G	A	C	T	T	G	A	A	A	G	A	G	C	C	A	C
577	Delta	>143701|29662|29890	C	A	A	T	C	T	T	T	A	A	T	C	A	G	T	G	T	G	T	A	A	C	A	T	T	A	G	G	G	A	G	G	A	C	T	T	G	A	A	A	G	A	G	C	C	A	C
578	Delta	>143700|29662|29890	C	A	A	T	C	T	T	T	A	A	T	C	A	G	T	G	T	G	T	A	A	C	A	T	T	A	G	G	G	A	G	G	A	C	T	T	G	A	A	A	G	A	G	C	C	A	C
579	Delta	>143699|29662|29890	C	A	A	T	C	T	T	T	A	A	T	C	A	G	T	G	T	G	T	A	A	C	A	T	T	A	G	G	G	A	G	G	A	C	T	T	G	A	A	A	G	A	G	C	C	A	C
580	Delta	>143696|29662|29890	C	A	A	T	C	T	T	T	A	A	T	C	A	G	T	G	T	G	T	A	A	C	A	T	T	A	G	G	G	A	G	G	A	C	T	T	G	A	A	A	G	A	G	C	C	A	C
581	Delta	>143693|29662|29890	C	A	A	T	C	T	T	T	A	A	T	C	A	G	T	G	T	G	T	A	A	C	A	T	T	A	G	G	G	A	G	G	A	C	T	T	G	A	A	A	G	A	G	C	C	A	C
582	Delta	>143691|29662|29890	C	A	A	T	C	T	T	T	A	A	T	C	A	G	T	G	T	G	T	A	A	C	A	T	T	A	G	G	G	A	G	G	A	C	T	T	G	A	A	A	G	A	G	C	C	A	C
583	Delta	>143690|29662|29890	C	A	A	T	C	T	T	T	A	A	T	C	A	G	T	G	T	G	T	A	A	C	A	T	T	A	G	G	G	A	G	G	A	C	T	T	G	A	A	A	G	A	G	C	C	A	C
584	Delta	>143688|29662|29890	C	A	A	T	C	T	T	T	A	A	T	C	A	G	T	G	T	G	T	A	A	C	A	T	T	A	G	G	G	A	G	G	A	C	T	T	G	A	A	A	G	A	G	C	C	A	C
585	Delta	>143687|29662|29890	C	A	A	T	C	T	T	T	A	A	T	C	A	G	T	G	T	G	T	A	A	C	A	T	T	A	G	G	G	A	G	G	A	C	T	T	G	A	A	A	G	A	G	C	C	A	C
586	Delta	>143686|29662|29890	C	A	A	T	C	T	T	T	A	A	T	C	A	G	T	G	T	G	T	A	A	C	A	T	T	A	G	G	G	A	G	G	A	C	T	T	G	A	A	A	G	A	G	C	C	A	C
587	Delta	>143685|29662|29890	C	A	A	T	C	T	T	T	A	A	T	C	A	G	T	G	T	G	T	A	A	C	A	T	T	A	G	G	G	A	G	G	A	C	T	T	G	A	A	A	G	A	G	C	C	A	C
588	Delta	>143684|29668|29896	C	A	A	T	C	T	T	T	A	A	T	C	A	G	T	G	T	G	T	A	A	C	A	T	T	A	G	G	G	A	G	G	A	C	T	T	G	A	A	A	G	A	G	C	C	A	C
589	Delta	>143682|29662|29890	C	A	A	T	C	T	T	T	A	A	T	C	A	G	T	G	T	G	T	A	A	C	A	T	T	A	G	G	G	A	G	G	A	C	T	T	G	A	A	A	G	A	G	C	C	A	C
590	Delta	>143681|29662|29890	C	A	A	T	C	T	T	T	A	A	T	C	A	G	T	G	T	G	T	A	A	C	A	T	T	A	G	G	G	A	G	G	A	C	T	T	G	A	A	A	G	A	G	C	C	A	C
591	Delta	>143680|29662|29890	C	A	A	T	C	T	T	T	A	A	T	C	A	G	T	G	T	G	T	A	A	C	A	T	T	A	G	G	G	A	G	G	A	C	T	T	G	A	A	A	G	A	G	C	C	A	C
592	Delta	>143679|29662|29890	C	A	A	T	C	T	T	T	A	A	T	C	A	G	T	G	T	G	T	A	A	C	A	T	T	A	G	G	G	A	G	G	A	C	T	T	G	A	A	A	G	A	G	C	C	A	C
593	Delta	>143678|29662|29890	C	A	A	T	C	T	T	T	A	A	T	C	A	G	T	G	T	G	T	A	A	C	A	T	T	A	G	G	G	A	G	G	A	C	T	T	G	A	A	A	G	A	G	C	C	A	C
594	Delta	>143677|29662|29890	C	A	A	T	C	T	T	T	A	A	T	C	A	G	T	G	T	G	T	A	A	C	A	T	T	A	G	G	G	A	G	G	A	C	T	T	G	A	A	A	G	A	G	C	C	A	C
595	Delta	>143676|29662|29890	C	A	A	T	C	T	T	T	A	A	T	C	A	G	T	G	T	G	T	A	A	C	A	T	T	A	G	G	G	A	G	G	A	C	T	T	G	A	A	A	G	A	G	C	C	A	C
596	Delta	>143674|29662|29890	C	A	A	T	C	T	T	T	A	A	T	C	A	G	T	G	T	G	T	A	A	C	A	T	T	A	G	G	G	A	G	G	A	C	T	T	G	A	A	A	G	A	G	C	C	A	C
597	Delta	>143673|29659|29887	C	A	A	T	C	T	T	T	A	A	T	C	A	G	T	G	T	G	T	A	A	C	A	T	T	A	G	G	G	A	G	G	A	C	T	T	G	A	A	A	G	A	G	C	C	A	C
598	Delta	>143672|29662|29890	C	A	A	T	C	T	T	T	A	A	T	C	A	G	T	G	T	G	T	A	A	C	A	T	T	A	G	G	G	A	G	G	A	C	T	T	G	A	A	A	G	A	G	C	C	A	C
599	Delta	>143671|29662|29890	C	A	A	T	C	T	T	T	A	A	T	C	A	G	T	G	T	G	T	A	A	C	A	T	T	A	G	G	G	A	G	G	A	C	T	T	G	A	A	A	G	A	G	C	C	A	C
600	Delta	>143670|29653|29881	C	A	A	T	C	T	T	T	A	A	T	C	A	G	T	G	T	G	T	A	A	C	A	T	T	A	G	G	G	A	G	G	A	C	T	T	G	A	A	A	G	A	G	C	C	A	C
601	Delta	>143665|29662|29890	C	A	A	T	C	T	T	T	A	A	T	C	A	G	T	G	T	G	T	A	A	C	A	T	T	A	G	G	G	A	G	G	A	C	T	T	G	A	A	A	G	A	G	C	C	A	C
602	Delta	>143663|29653|29881	C	A	A	T	C	T	T	T	A	A	T	C	A	G	T	G	T	G	T	A	A	C	A	T	T	A	G	G	G	A	G	G	A	C	T	T	G	A	A	A	G	A	G	C	C	A	C
603	Delta	>143661|29662|29890	C	A	A	T	C	T	T	T	A	A	T	C	A	G	T	G	T	G	T	A	A	C	A	T	T	A	G	G	G	A	G	G	A	C	T	T	G	A	A	A	G	A	G	C	C	A	C
604	Delta	>143660|29662|29890	C	A	A	T	C	T	T	T	A	A	T	C	A	G	T	G	T	G	T	A	A	C	A	T	T	A	G	G	G	A	G	G	A	C	T	T	G	A	A	A	G	A	G	C	C	A	C
605	Delta	>143659|29662|29890	C	A	A	T	C	T	T	T	A	A	T	C	A	G	T	G	T	G	T	A	A	C	A	T	T	A	G	G	G	A	G	G	A	C	T	T	G	A	A	A	G	A	G	C	C	A	C
606	Delta	>143658|29662|29890	C	A	A	T	C	T	T	T	A	A	T	C	A	G	T	G	T	G	T	A	A	C	A	T	T	A	G	G	G	A	G	G	A	C	T	T	G	A	A	A	G	A	G	C	C	A	C
607	Delta	>143657|29662|29890	C	A	A	T	C	T	T	T	A	A	T	C	A	G	T	G	T	G	T	A	A	C	A	T	T	A	G	G	G	A	G	G	A	C	T	T	G	A	A	A	G	A	G	C	C	A	C
608	Delta	>143655|29662|29890	C	A	A	T	C	T	T	T	A	A	T	C	A	G	T	G	T	G	T	A	A	C	A	T	T	A	G	G	G	A	G	G	A	C	T	T	G	A	A	A	G	A	G	C	C	A	C
609	Delta	>143654|29662|29890	C	A	A	T	C	T	T	T	A	A	T	C	A	G	T	G	T	G	T	A	A	C	A	T	T	A	G	G	G	A	G	G	A	C	T	T	G	A	A	A	G	A	G	C	C	A	C
610	Delta	>143653|29653|29881	C	A	A	T	C	T	T	T	A	A	T	C	A	G	T	G	T	G	T	A	A	C	A	T	T	A	G	G	G	A	G	G	A	C	T	T	G	A	A	A	G	A	G	C	C	A	C
611	Delta	>143652|29662|29890	C	A	A	T	C	T	T	T	A	A	T	C	A	G	T	G	T	G	T	A	A	C	A	T	T	A	G	G	G	A	G	G	A	C	T	T	G	A	A	A	G	A	G	C	C	A	C
612	Delta	>143651|29662|29890	C	A	A	T	C	T	T	T	A	A	T	C	A	G	T	G	T	G	T	A	A	C	A	T	T	A	G	G	G	A	G	G	A	C	T	T	G	A	A	A	G	A	G	C	C	A	C
613	Delta	>143650|29662|29890	C	A	A	T	C	T	T	T	A	A	T	C	A	G	T	G	T	G	T	A	A	C	A	T	T	A	G	G	G	A	G	G	A	C	T	T	G	A	A	A	G	A	G	C	C	A	C
614	Delta	>143649|29653|29881	C	A	A	T	C	T	T	T	A	A	T	C	A	G	T	G	T	G	T	A	A	C	A	T	T	A	G	G	G	A	G	G	A	C	T	T	G	A	A	A	G	A	G	C	C	A	C
615	Delta	>143648|29662|29890	C	A	A	T	C	T	T	T	A	A	T	C	A	G	T	G	T	G	T	A	A	C	A	T	T	A	G	G	G	A	G	G	A	C	T	T	G	A	A	A	G	A	G	C	C	A	C
616	Delta	>143647|29662|29890	C	A	A	T	C	T	T	T	A	A	T	C	A	G	T	G	T	G	T	A	A	C	A	T	T	A	G	G	G	A	G	G	A	C	T	T	G	A	A	A	G	A	G	C	C	A	C
617	Delta	>143646|29662|29890	C	A	A	T	C	T	T	T	A	A	T	C	A	G	T	G	T	G	T	A	A	C	A	T	T	A	G	G	G	A	G	G	A	C	T	T	G	A	A	A	G	A	G	C	C	A	C
618	Delta	>143645|29662|29890	C	A	A	T	C	T	T	T	A	A	T	C	A	G	T	G	T	G	T	A	A	C	A	T	T	A	G	G	G	A	G	G	A	C	T	T	G	A	A	A	G	A	G	C	C	A	C
619	Delta	>143644|29662|29890	C	A	A	T	C	T	T	T	A	A	T	C	A	G	T	G	T	G	T	A	A	C	A	T	T	A	G	G	G	A	G	G	A	C	T	T	G	A	A	A	G	A	G	C	C	A	C
620	Delta	>143642|29662|29890	C	A	A	T	C	T	T	T	A	A	T	C	A	G	T	G	T	G	T	A	A	C	A	T	T	A	G	G	G	A	G	G	A	C	T	T	G	A	A	A	G	A	G	C	C	A	C
621	Delta	>143639|29659|29887	C	A	A	T	C	T	T	T	A	A	T	C	A	G	T	G	T	G	T	A	A	C	A	T	T	A	G	G	G	A	G	G	A	C	T	T	G	A	A	A	G	A	G	C	C	A	C
622	Delta	>143638|29662|29890	C	A	A	T	C	T	T	T	A	A	T	C	A	G	T	G	T	G	T	A	A	C	A	T	T	A	G	G	G	A	G	G	A	C	T	T	G	A	A	A	G	A	G	C	C	A	C
623	Delta	>143637|29662|29890	C	A	A	T	C	T	T	T	A	A	T	C	A	G	T	G	T	G	T	A	A	C	A	T	T	A	G	G	G	A	G	G	A	C	T	T	G	A	A	A	G	A	G	C	C	A	C
624	Delta	>143636|29662|29890	C	A	A	T	C	T	T	T	A	A	T	C	A	G	T	G	T	G	T	A	A	C	A	T	T	A	G	G	G	A	G	G	A	C	T	T	G	A	A	A	G	A	G	C	C	A	C
625	Delta	>143635|29662|29890	C	A	A	T	C	T	T	T	A	A	T	C	A	G	T	G	T	G	T	A	A	C	A	T	T	A	G	G	G	A	G	G	A	C	T	T	G	A	A	A	G	A	G	C	C	A	C
626	Delta	>143634|29662|29890	C	A	A	T	C	T	T	T	A	A	T	C	A	G	T	G	T	G	T	A	A	C	A	T	T	A	G	G	G	A	G	G	A	C	T	T	G	A	A	A	G	A	G	C	C	A	C
627	Delta	>143633|29662|29890	C	A	A	T	C	T	T	T	A	A	T	C	A	G	T	G	T	G	T	A	A	C	A	T	T	A	G	G	G	A	G	G	A	C	T	T	G	A	A	A	G	A	G	C	C	A	C
628	Delta	>143632|29662|29890	C	A	A	T	C	T	T	T	A	A	T	C	A	G	T	G	T	G	T	A	A	C	A	T	T	A	G	G	G	A	G	G	A	C	T	T	G	A	A	A	G	A	G	C	C	A	C
629	Delta	>143631|29662|29890	C	A	A	T	C	T	T	T	A	A	T	C	A	G	T	G	T	G	T	A	A	C	A	T	T	A	G	G	G	A	G	G	A	C	T	T	G	A	A	A	G	A	G	C	C	A	C
630	Delta	>143629|29662|29890	C	A	A	T	C	T	T	T	A	A	T	C	A	G	T	G	T	G	T	A	A	C	A	T	T	A	G	G	G	A	G	G	A	C	T	T	G	A	A	A	G	A	G	C	C	A	C
631	Delta	>143628|29662|29890	C	A	A	T	C	T	T	T	A	A	T	C	A	G	T	G	T	G	T	A	A	C	A	T	T	A	G	G	G	A	G	G	A	C	T	T	G	A	A	A	G	A	G	C	C	A	C
632	Delta	>143627|29662|29890	C	A	A	T	C	T	T	T	A	A	T	C	A	G	T	G	T	G	T	A	A	C	A	T	T	A	G	G	G	A	G	G	A	C	T	T	G	A	A	A	G	A	G	C	C	A	C
633	Delta	>143626|29656|29884	C	A	A	T	C	T	T	T	A	A	T	C	A	G	T	G	T	G	T	A	A	C	A	T	T	A	G	G	G	A	G	G	A	C	T	T	G	A	A	A	G	A	G	C	C	A	C
634	Delta	>143625|29662|29890	C	A	A	T	C	T	T	T	A	A	T	C	A	G	T	G	T	G	T	A	A	C	A	T	T	A	G	G	G	A	G	G	A	C	T	T	G	A	A	A	G	A	G	C	C	A	C
635	Delta	>143623|29662|29890	C	A	A	T	C	T	T	T	A	A	T	C	A	G	T	G	T	G	T	A	A	C	A	T	T	A	G	G	G	A	G	G	A	C	T	T	G	A	A	A	G	A	G	C	C	A	C
636	Delta	>143622|29662|29890	C	A	A	T	C	T	T	T	A	A	T	C	A	G	T	G	T	G	T	A	A	C	A	T	T	A	G	G	G	A	G	G	A	C	T	T	G	A	A	A	G	A	G	C	C	A	C
637	Delta	>143621|29662|29890	C	A	A	T	C	T	T	T	A	A	T	C	A	G	T	G	T	G	T	A	A	C	A	T	T	A	G	G	G	A	G	G	A	C	T	T	G	A	A	A	G	A	G	C	C	A	C
638	Delta	>143618|29653|29881	C	A	A	T	C	T	T	T	A	A	T	C	A	G	T	G	T	G	T	A	A	C	A	T	T	A	G	G	G	A	G	G	A	C	T	T	G	A	A	A	G	A	G	C	C	A	C
639	Delta	>143617|29653|29881	C	A	A	T	C	T	T	T	A	A	T	C	A	G	T	G	T	G	T	A	A	C	A	T	T	A	G	G	G	A	G	G	A	C	T	T	G	A	A	A	G	A	G	C	C	A	C
640	Delta	>143615|29662|29890	C	A	A	T	C	T	T	T	A	A	T	C	A	G	T	G	T	G	T	A	A	C	A	T	T	A	G	G	G	A	G	G	A	C	T	T	G	A	A	A	G	A	G	C	C	A	C
641	Delta	>143614|29662|29890	C	A	A	T	C	T	T	T	A	A	T	C	A	G	T	G	T	G	T	A	A	C	A	T	T	A	G	G	G	A	G	G	A	C	T	T	G	A	A	A	G	A	G	C	C	A	C
642	Delta	>143613|29662|29890	C	A	A	T	C	T	T	T	A	A	T	C	A	G	T	G	T	G	T	A	A	C	A	T	T	A	G	G	G	A	G	G	A	C	T	T	G	A	A	A	G	A	G	C	C	A	C
643	Delta	>143612|29662|29890	C	A	A	T	C	T	T	T	A	A	T	C	A	G	T	G	T	G	T	A	A	C	A	T	T	A	G	G	G	A	G	G	A	C	T	T	G	A	A	A	G	A	G	C	C	A	C
644	Delta	>143611|29662|29890	C	A	A	T	C	T	T	T	A	A	T	C	A	G	T	G	T	G	T	A	A	C	A	T	T	A	G	G	G	A	G	G	A	C	T	T	G	A	A	A	G	A	G	C	C	A	C
645	Delta	>143610|29662|29890	C	A	A	T	C	T	T	T	A	A	T	C	A	G	T	G	T	G	T	A	A	C	A	T	T	A	G	G	G	A	G	G	A	C	T	T	G	A	A	A	G	A	G	C	C	A	C
646	Delta	>143609|29662|29890	C	A	A	T	C	T	T	T	A	A	T	C	A	G	T	G	T	G	T	A	A	C	A	T	T	A	G	G	G	A	G	G	A	C	T	T	G	A	A	A	G	A	G	C	C	A	C
647	Delta	>143608|29662|29890	C	A	A	T	C	T	T	T	A	A	T	C	A	G	T	G	T	G	T	A	A	C	A	T	T	A	G	G	G	A	G	G	A	C	T	T	G	A	A	A	G	A	G	C	C	A	C
648	Delta	>143607|29662|29890	C	A	A	T	C	T	T	T	A	A	T	C	A	G	T	G	T	G	T	A	A	C	A	T	T	A	G	G	G	A	G	G	A	C	T	T	G	A	A	A	G	A	G	C	C	A	C
649	Delta	>143606|29662|29890	C	A	A	T	C	T	T	T	A	A	T	C	A	G	T	G	T	G	T	A	A	C	A	T	T	A	G	G	G	A	G	G	A	C	T	T	G	A	A	A	G	A	G	C	C	A	C
650	Delta	>143605|29662|29890	C	A	A	T	C	T	T	T	A	A	T	C	A	G	T	G	T	G	T	A	A	C	A	T	T	A	G	G	G	A	G	G	A	C	T	T	G	A	A	A	G	A	G	C	C	A	C
651	Delta	>143604|29662|29890	C	A	A	T	C	T	T	T	A	A	T	C	A	G	T	G	T	G	T	A	A	C	A	T	T	A	G	G	G	A	G	G	A	C	T	T	G	A	A	A	G	A	G	C	C	A	C
652	Delta	>143603|29662|29890	C	A	A	T	C	T	T	T	A	A	T	C	A	G	T	G	T	G	T	A	A	C	A	T	T	A	G	G	G	A	G	G	A	C	T	T	G	A	A	A	G	A	G	C	C	A	C
653	Delta	>143602|29662|29890	C	A	A	T	C	T	T	T	A	A	T	C	A	G	T	G	T	G	T	A	A	C	A	T	T	A	G	G	G	A	G	G	A	C	T	T	G	A	A	A	G	A	G	C	C	A	C
654	Delta	>143600|29662|29890	C	A	A	T	C	T	T	T	A	A	T	C	A	G	T	G	T	G	T	A	A	C	A	T	T	A	G	G	G	A	G	G	A	C	T	T	G	A	A	A	G	A	G	C	C	A	C
655	Delta	>143599|29662|29890	C	A	A	T	C	T	T	T	A	A	T	C	A	G	T	G	T	G	T	A	A	C	A	T	T	A	G	G	G	A	G	G	A	C	T	T	G	A	A	A	G	A	G	C	C	A	C
656	Delta	>143598|29662|29890	C	A	A	T	C	T	T	T	A	A	T	C	A	G	T	G	T	G	T	A	A	C	A	T	T	A	G	G	G	A	G	G	A	C	T	T	G	A	A	A	G	A	G	C	C	A	C
657	Delta	>143597|29662|29890	C	A	A	T	C	T	T	T	A	A	T	C	A	G	T	G	T	G	T	A	A	C	A	T	T	A	G	G	G	A	G	G	A	C	T	T	G	A	A	A	G	A	G	C	C	A	C
658	Delta	>143595|29662|29890	C	A	A	T	C	T	T	T	A	A	T	C	A	G	T	G	T	G	T	A	A	C	A	T	T	A	G	G	G	A	G	G	A	C	T	T	G	A	A	A	G	A	G	C	C	A	C
659	Delta	>143594|29662|29890	C	A	A	T	C	T	T	T	A	A	T	C	A	G	T	G	T	G	T	A	A	C	A	T	T	A	G	G	G	A	G	G	A	C	T	T	G	A	A	A	G	A	G	C	C	A	C
660	Delta	>143593|29662|29890	C	A	A	T	C	T	T	T	A	A	T	C	A	G	T	G	T	G	T	A	A	C	A	T	T	A	G	G	G	A	G	G	A	C	T	T	G	A	A	A	G	A	G	C	C	A	C
661	Delta	>143592|29662|29890	C	A	A	T	C	T	T	T	A	A	T	C	A	G	T	G	T	G	T	A	A	C	A	T	T	A	G	G	G	A	G	G	A	C	T	T	G	A	A	A	G	A	G	C	C	A	C
662	Delta	>143591|29656|29884	C	A	A	T	C	T	T	T	A	A	T	C	A	G	T	G	T	G	T	A	A	C	A	T	T	A	G	G	G	A	G	G	A	C	T	T	G	A	A	A	G	A	G	C	C	A	C
663	Delta	>143590|29662|29890	C	A	A	T	C	T	T	T	A	A	T	C	A	G	T	G	T	G	T	A	A	C	A	T	T	A	G	G	G	A	G	G	A	C	T	T	G	A	A	A	G	A	G	C	C	A	C
664	Delta	>143589|29662|29890	C	A	A	T	C	T	T	T	A	A	T	C	A	G	T	G	T	G	T	A	A	C	A	T	T	A	G	G	G	A	G	G	A	C	T	T	G	A	A	A	G	A	G	C	C	A	C
665	Delta	>143588|29662|29890	C	A	A	T	C	T	T	T	A	A	T	C	A	G	T	G	T	G	T	A	A	C	A	T	T	A	G	G	G	A	G	G	A	C	T	T	G	A	A	A	G	A	G	C	C	A	C
666	Delta	>143587|29662|29890	C	A	A	T	C	T	T	T	A	A	T	C	A	G	T	G	T	G	T	A	A	C	A	T	T	A	G	G	G	A	G	G	A	C	T	T	G	A	A	A	G	A	G	C	C	A	C
667	Delta	>143586|29662|29890	C	A	A	T	C	T	T	T	A	A	T	C	A	G	T	G	T	G	T	A	A	C	A	T	T	A	G	G	G	A	G	G	A	C	T	T	G	A	A	A	G	A	G	C	C	A	C
668	Delta	>143584|29659|29887	C	A	A	T	C	T	T	T	A	A	T	C	A	G	T	G	T	G	T	A	A	C	A	T	T	A	G	G	G	A	G	G	A	C	T	T	G	A	A	A	G	A	G	C	C	A	C
669	Delta	>143582|29656|29884	C	A	A	T	C	T	T	T	A	A	T	C	A	G	T	G	T	G	T	A	A	C	A	T	T	A	G	G	G	A	G	G	A	C	T	T	G	A	A	A	G	A	G	C	C	A	C
670	Delta	>143581|29662|29890	C	A	A	T	C	T	T	T	A	A	T	C	A	G	T	G	T	G	T	A	A	C	A	T	T	A	G	G	G	A	G	G	A	C	T	T	G	A	A	A	G	A	G	C	C	A	C
671	Delta	>143580|29662|29890	C	A	A	T	C	T	T	T	A	A	T	C	A	G	T	G	T	G	T	A	A	C	A	T	T	A	G	G	G	A	G	G	A	C	T	T	G	A	A	A	G	A	G	C	C	A	C
672	Delta	>143579|29662|29890	C	A	A	T	C	T	T	T	A	A	T	C	A	G	T	G	T	G	T	A	A	C	A	T	T	A	G	G	G	A	G	G	A	C	T	T	G	A	A	A	G	A	G	C	C	A	C
673	Delta	>143578|29662|29890	C	A	A	T	C	T	T	T	A	A	T	C	A	G	T	G	T	G	T	A	A	C	A	T	T	A	G	G	G	A	G	G	A	C	T	T	G	A	A	A	G	A	G	C	C	A	C
674	Delta	>143577|29662|29890	C	A	A	T	C	T	T	T	A	A	T	C	A	G	T	G	T	G	T	A	A	C	A	T	T	A	G	G	G	A	G	G	A	C	T	T	G	A	A	A	G	A	G	C	C	A	C
675	Delta	>143576|29662|29890	C	A	A	T	C	T	T	T	A	A	T	C	A	G	T	G	T	G	T	A	A	C	A	T	T	A	G	G	G	A	G	G	A	C	T	T	G	A	A	A	G	A	G	C	C	A	C
676	Delta	>143574|29662|29890	C	A	A	T	C	T	T	T	A	A	T	C	A	G	T	G	T	G	T	A	A	C	A	T	T	A	G	G	G	A	G	G	A	C	T	T	G	A	A	A	G	A	G	C	C	A	C
677	Delta	>143573|29662|29890	C	A	A	T	C	T	T	T	A	A	T	C	A	G	T	G	T	G	T	A	A	C	A	T	T	A	G	G	G	A	G	G	A	C	T	T	G	A	A	A	G	A	G	C	C	A	C
678	Delta	>143572|29662|29890	C	A	A	T	C	T	T	T	A	A	T	C	A	G	T	G	T	G	T	A	A	C	A	T	T	A	G	G	G	A	G	G	A	C	T	T	G	A	A	A	G	A	G	C	C	A	C
679	Delta	>143571|29662|29890	C	A	A	T	C	T	T	T	A	A	T	C	A	G	T	G	T	G	T	A	A	C	A	T	T	A	G	G	G	A	G	G	A	C	T	T	G	A	A	A	G	A	G	C	C	A	C
680	Delta	>143570|29662|29890	C	A	A	T	C	T	T	T	A	A	T	C	A	G	T	G	T	G	T	A	A	C	A	T	T	A	G	G	G	A	G	G	A	C	T	T	G	A	A	A	G	A	G	C	C	A	C
681	Delta	>143569|29662|29890	C	A	A	T	C	T	T	T	A	A	T	C	A	G	T	G	T	G	T	A	A	C	A	T	T	A	G	G	G	A	G	G	A	C	T	T	G	A	A	A	G	A	G	C	C	A	C
682	Delta	>143568|29662|29890	C	A	A	T	C	T	T	T	A	A	T	C	A	G	T	G	T	G	T	A	A	C	A	T	T	A	G	G	G	A	G	G	A	C	T	T	G	A	A	A	G	A	G	C	C	A	C
683	Delta	>143567|29653|29881	C	A	A	T	C	T	T	T	A	A	T	C	A	G	T	G	T	G	T	A	A	C	A	T	T	A	G	G	G	A	G	G	A	C	T	T	G	A	A	A	G	A	G	C	C	A	C
684	Delta	>143566|29662|29890	C	A	A	T	C	T	T	T	A	A	T	C	A	G	T	G	T	G	T	A	A	C	A	T	T	A	G	G	G	A	G	G	A	C	T	T	G	A	A	A	G	A	G	C	C	A	C
685	Delta	>143565|29659|29887	C	A	A	T	C	T	T	T	A	A	T	C	A	G	T	G	T	G	T	A	A	C	A	T	T	A	G	G	G	A	G	G	A	C	T	T	G	A	A	A	G	A	G	C	C	A	C
686	Delta	>143564|29662|29890	C	A	A	T	C	T	T	T	A	A	T	C	A	G	T	G	T	G	T	A	A	C	A	T	T	A	G	G	G	A	G	G	A	C	T	T	G	A	A	A	G	A	G	C	C	A	C
687	Delta	>143563|29662|29890	C	A	A	T	C	T	T	T	A	A	T	C	A	G	T	G	T	G	T	A	A	C	A	T	T	A	G	G	G	A	G	G	A	C	T	T	G	A	A	A	G	A	G	C	C	A	C
688	Delta	>143562|29662|29890	C	A	A	T	C	T	T	T	A	A	T	C	A	G	T	G	T	G	T	A	A	C	A	T	T	A	G	G	G	A	G	G	A	C	T	T	G	A	A	A	G	A	G	C	C	A	C
689	Delta	>143559|29662|29890	C	A	A	T	C	T	T	T	A	A	T	C	A	G	T	G	T	G	T	A	A	C	A	T	T	A	G	G	G	A	G	G	A	C	T	T	G	A	A	A	G	A	G	C	C	A	C
690	Delta	>143558|29662|29890	C	A	A	T	C	T	T	T	A	A	T	C	A	G	T	G	T	G	T	A	A	C	A	T	T	A	G	G	G	A	G	G	A	C	T	T	G	A	A	A	G	A	G	C	C	A	C
691	Delta	>143556|29662|29890	C	A	A	T	C	T	T	T	A	A	T	C	A	G	T	G	T	G	T	A	A	C	A	T	T	A	G	G	G	A	G	G	A	C	T	T	G	A	A	A	G	A	G	C	C	A	C
692	Delta	>143555|29662|29890	C	A	A	T	C	T	T	T	A	A	T	C	A	G	T	G	T	G	T	A	A	C	A	T	T	A	G	G	G	A	G	G	A	C	T	T	G	A	A	A	G	A	G	C	C	A	C
693	Delta	>143554|29662|29890	C	A	A	T	C	T	T	T	A	A	T	C	A	G	T	G	T	G	T	A	A	C	A	T	T	A	G	G	G	A	G	G	A	C	T	T	G	A	A	A	G	A	G	C	C	A	C
694	Delta	>143553|29671|29899	C	A	A	T	C	T	T	T	A	A	T	C	A	G	T	G	T	G	T	A	A	C	A	T	T	A	G	G	G	A	G	G	A	C	T	T	G	A	A	A	G	A	G	C	C	A	C
695	Delta	>143552|29662|29890	C	A	A	T	C	T	T	T	A	A	T	C	A	G	T	G	T	G	T	A	A	C	A	T	T	A	G	G	G	A	G	G	A	C	T	T	G	A	A	A	G	A	G	C	C	A	C
696	Delta	>143550|29662|29890	C	A	A	T	C	T	T	T	A	A	T	C	A	G	T	G	T	G	T	A	A	C	A	T	T	A	G	G	G	A	G	G	A	C	T	T	G	A	A	A	G	A	G	C	C	A	C
697	Delta	>143548|29662|29890	C	A	A	T	C	T	T	T	A	A	T	C	A	G	T	G	T	G	T	A	A	C	A	T	T	A	G	G	G	A	G	G	A	C	T	T	G	A	A	A	G	A	G	C	C	A	C
698	Delta	>143547|29650|29878	C	A	A	T	C	T	T	T	A	A	T	C	A	G	T	G	T	G	T	A	A	C	A	T	T	A	G	G	G	A	G	G	A	C	T	T	G	A	A	A	G	A	G	C	C	A	C
699	Delta	>143546|29662|29890	C	A	A	T	C	T	T	T	A	A	T	C	A	G	T	G	T	G	T	A	A	C	A	T	T	A	G	G	G	A	G	G	A	C	T	T	G	A	A	A	G	A	G	C	C	A	C
700	Delta	>143545|29662|29890	C	A	A	T	C	T	T	T	A	A	T	C	A	G	T	G	T	G	T	A	A	C	A	T	T	A	G	G	G	A	G	G	A	C	T	T	G	A	A	A	G	A	G	C	C	A	C
701	Delta	>143544|29662|29890	C	A	A	T	C	T	T	T	A	A	T	C	A	G	T	G	T	G	T	A	A	C	A	T	T	A	G	G	G	A	G	G	A	C	T	T	G	A	A	A	G	A	G	C	C	A	C
702	Delta	>143542|29659|29887	C	A	A	T	C	T	T	T	A	A	T	C	A	G	T	G	T	G	T	A	A	C	A	T	T	A	G	G	G	A	G	G	A	C	T	T	G	A	A	A	G	A	G	C	C	A	C
703	Delta	>143541|29662|29890	C	A	A	T	C	T	T	T	A	A	T	C	A	G	T	G	T	G	T	A	A	C	A	T	T	A	G	G	G	A	G	G	A	C	T	T	G	A	A	A	G	A	G	C	C	A	C
704	Delta	>143539|29662|29890	C	A	A	T	C	T	T	T	A	A	T	C	A	G	T	G	T	G	T	A	A	C	A	T	T	A	G	G	G	A	G	G	A	C	T	T	G	A	A	A	G	A	G	C	C	A	C
705	Delta	>143538|29662|29890	C	A	A	T	C	T	T	T	A	A	T	C	A	G	T	G	T	G	T	A	A	C	A	T	T	A	G	G	G	A	G	G	A	C	T	T	G	A	A	A	G	A	G	C	C	A	C
706	Delta	>143537|29662|29890	C	A	A	T	C	T	T	T	A	A	T	C	A	G	T	G	T	G	T	A	A	C	A	T	T	A	G	G	G	A	G	G	A	C	T	T	G	A	A	A	G	A	G	C	C	A	C
707	Delta	>143535|29662|29890	C	A	A	T	C	T	T	T	A	A	T	C	A	G	T	G	T	G	T	A	A	C	A	T	T	A	G	G	G	A	G	G	A	C	T	T	G	A	A	A	G	A	G	C	C	A	C
708	Delta	>143533|29662|29890	C	A	A	T	C	T	T	T	A	A	T	C	A	G	T	G	T	G	T	A	A	C	A	T	T	A	G	G	G	A	G	G	A	C	T	T	G	A	A	A	G	A	G	C	C	A	C
709	Delta	>143531|29662|29890	C	A	A	T	C	T	T	T	A	A	T	C	A	G	T	G	T	G	T	A	A	C	A	T	T	A	G	G	G	A	G	G	A	C	T	T	G	A	A	A	G	A	G	C	C	A	C
710	Delta	>143530|29662|29890	C	A	A	T	C	T	T	T	A	A	T	C	A	G	T	G	T	G	T	A	A	C	A	T	T	A	G	G	G	A	G	G	A	C	T	T	G	A	A	A	G	A	G	C	C	A	C
711	Delta	>143529|29662|29890	C	A	A	T	C	T	T	T	A	A	T	C	A	G	T	G	T	G	T	A	A	C	A	T	T	A	G	G	G	A	G	G	A	C	T	T	G	A	A	A	G	A	G	C	C	A	C
712	Delta	>143527|29662|29890	C	A	A	T	C	T	T	T	A	A	T	C	A	G	T	G	T	G	T	A	A	C	A	T	T	A	G	G	G	A	G	G	A	C	T	T	G	A	A	A	G	A	G	C	C	A	C
713	Delta	>143525|29662|29890	C	A	A	T	C	T	T	T	A	A	T	C	A	G	T	G	T	G	T	A	A	C	A	T	T	A	G	G	G	A	G	G	A	C	T	T	G	A	A	A	G	A	G	C	C	A	C
714	Delta	>143524|29662|29890	C	A	A	T	C	T	T	T	A	A	T	C	A	G	T	G	T	G	T	A	A	C	A	T	T	A	G	G	G	A	G	G	A	C	T	T	G	A	A	A	G	A	G	C	C	A	C
715	Delta	>143522|29662|29890	C	A	A	T	C	T	T	T	A	A	T	C	A	G	T	G	T	G	T	A	A	C	A	T	T	A	G	G	G	A	G	G	A	C	T	T	G	A	A	A	G	A	G	C	C	A	C
716	Delta	>143521|29662|29890	C	A	A	T	C	T	T	T	A	A	T	C	A	G	T	G	T	G	T	A	A	C	A	T	T	A	G	G	G	A	G	G	A	C	T	T	G	A	A	A	G	A	G	C	C	A	C
717	Delta	>143520|29662|29890	C	A	A	T	C	T	T	T	A	A	T	C	A	G	T	G	T	G	T	A	A	C	A	T	T	A	G	G	G	A	G	G	A	C	T	T	G	A	A	A	G	A	G	C	C	A	C
718	Delta	>143517|29662|29890	C	A	A	T	C	T	T	T	A	A	T	C	A	G	T	G	T	G	T	A	A	C	A	T	T	A	G	G	G	A	G	G	A	C	T	T	G	A	A	A	G	A	G	C	C	A	C
719	Delta	>143516|29662|29890	C	A	A	T	C	T	T	T	A	A	T	C	A	G	T	G	T	G	T	A	A	C	A	T	T	A	G	G	G	A	G	G	A	C	T	T	G	A	A	A	G	A	G	C	C	A	C
720	Delta	>143515|29662|29890	C	A	A	T	C	T	T	T	A	A	T	C	A	G	T	G	T	G	T	A	A	C	A	T	T	A	G	G	G	A	G	G	A	C	T	T	G	A	A	A	G	A	G	C	C	A	C
721	Delta	>143514|29662|29890	C	A	A	T	C	T	T	T	A	A	T	C	A	G	T	G	T	G	T	A	A	C	A	T	T	A	G	G	G	A	G	G	A	C	T	T	G	A	A	A	G	A	G	C	C	A	C
722	Delta	>143511|29662|29890	C	A	A	T	C	T	T	T	A	A	T	C	A	G	T	G	T	G	T	A	A	C	A	T	T	A	G	G	G	A	G	G	A	C	T	T	G	A	A	A	G	A	G	C	C	A	C
723	Delta	>143509|29671|29899	C	A	A	T	C	T	T	T	A	A	T	C	A	G	T	G	T	G	T	A	A	C	A	T	T	A	G	G	G	A	G	G	A	C	T	T	G	A	A	A	G	A	G	C	C	A	C
724	Delta	>143508|29662|29890	C	A	A	T	C	T	T	T	A	A	T	C	A	G	T	G	T	G	T	A	A	C	A	T	T	A	G	G	G	A	G	G	A	C	T	T	G	A	A	A	G	A	G	C	C	A	C
725	Delta	>143507|29662|29890	C	A	A	T	C	T	T	T	A	A	T	C	A	G	T	G	T	G	T	A	A	C	A	T	T	A	G	G	G	A	G	G	A	C	T	T	G	A	A	A	G	A	G	C	C	A	C
726	Delta	>143506|29662|29890	C	A	A	T	C	T	T	T	A	A	T	C	A	G	T	G	T	G	T	A	A	C	A	T	T	A	G	G	G	A	G	G	A	C	T	T	G	A	A	A	G	A	G	C	C	A	C
727	Delta	>143505|29662|29890	C	A	A	T	C	T	T	T	A	A	T	C	A	G	T	G	T	G	T	A	A	C	A	T	T	A	G	G	G	A	G	G	A	C	T	T	G	A	A	A	G	A	G	C	C	A	C
728	Delta	>143503|29662|29890	C	A	A	T	C	T	T	T	A	A	T	C	A	G	T	G	T	G	T	A	A	C	A	T	T	A	G	G	G	A	G	G	A	C	T	T	G	A	A	A	G	A	G	C	C	A	C
729	Delta	>143502|29659|29887	C	A	A	T	C	T	T	T	A	A	T	C	A	G	T	G	T	G	T	A	A	C	A	T	T	A	G	G	G	A	G	G	A	C	T	T	G	A	A	A	G	A	G	C	C	A	C
730	Delta	>143500|29662|29890	C	A	A	T	C	T	T	T	A	A	T	C	A	G	T	G	T	G	T	A	A	C	A	T	T	A	G	G	G	A	G	G	A	C	T	T	G	A	A	A	G	A	G	C	C	A	C
731	Delta	>143499|29662|29890	C	A	A	T	C	T	T	T	A	A	T	C	A	G	T	G	T	G	T	A	A	C	A	T	T	A	G	G	G	A	G	G	A	C	T	T	G	A	A	A	G	A	G	C	C	A	C
732	Delta	>143498|29662|29890	C	A	A	T	C	T	T	T	A	A	T	C	A	G	T	G	T	G	T	A	A	C	A	T	T	A	G	G	G	A	G	G	A	C	T	T	G	A	A	A	G	A	G	C	C	A	C
733	Delta	>143496|29662|29890	C	A	A	T	C	T	T	T	A	A	T	C	A	G	T	G	T	G	T	A	A	C	A	T	T	A	G	G	G	A	G	G	A	C	T	T	G	A	A	A	G	A	G	C	C	A	C
734	Delta	>143495|29653|29881	C	A	A	T	C	T	T	T	A	A	T	C	A	G	T	G	T	G	T	A	A	C	A	T	T	A	G	G	G	A	G	G	A	C	T	T	G	A	A	A	G	A	G	C	C	A	C
735	Delta	>143494|29662|29890	C	A	A	T	C	T	T	T	A	A	T	C	A	G	T	G	T	G	T	A	A	C	A	T	T	A	G	G	G	A	G	G	A	C	T	T	G	A	A	A	G	A	G	C	C	A	C
736	Delta	>143493|29662|29890	C	A	A	T	C	T	T	T	A	A	T	C	A	G	T	G	T	G	T	A	A	C	A	T	T	A	G	G	G	A	G	G	A	C	T	T	G	A	A	A	G	A	G	C	C	A	C
737	Delta	>143491|29662|29890	C	A	A	T	C	T	T	T	A	A	T	C	A	G	T	G	T	G	T	A	A	C	A	T	T	A	G	G	G	A	G	G	A	C	T	T	G	A	A	A	G	A	G	C	C	A	C
738	Delta	>143490|29662|29890	C	A	A	T	C	T	T	T	A	A	T	C	A	G	T	G	T	G	T	A	A	C	A	T	T	A	G	G	G	A	G	G	A	C	T	T	G	A	A	A	G	A	G	C	C	A	C
739	Delta	>143489|29662|29890	C	A	A	T	C	T	T	T	A	A	T	C	A	G	T	G	T	G	T	A	A	C	A	T	T	A	G	G	G	A	G	G	A	C	T	T	G	A	A	A	G	A	G	C	C	A	C
740	Delta	>143487|29662|29890	C	A	A	T	C	T	T	T	A	A	T	C	A	G	T	G	T	G	T	A	A	C	A	T	T	A	G	G	G	A	G	G	A	C	T	T	G	A	A	A	G	A	G	C	C	A	C
741	Delta	>143486|29662|29890	C	A	A	T	C	T	T	T	A	A	T	C	A	G	T	G	T	G	T	A	A	C	A	T	T	A	G	G	G	A	G	G	A	C	T	T	G	A	A	A	G	A	G	C	C	A	C
742	Delta	>143485|29662|29890	C	A	A	T	C	T	T	T	A	A	T	C	A	G	T	G	T	G	T	A	A	C	A	T	T	A	G	G	G	A	G	G	A	C	T	T	G	A	A	A	G	A	G	C	C	A	C
743	Delta	>143484|29662|29890	C	A	A	T	C	T	T	T	A	A	T	C	A	G	T	G	T	G	T	A	A	C	A	T	T	A	G	G	G	A	G	G	A	C	T	T	G	A	A	A	G	A	G	C	C	A	C
744	Delta	>143482|29662|29890	C	A	A	T	C	T	T	T	A	A	T	C	A	G	T	G	T	G	T	A	A	C	A	T	T	A	G	G	G	A	G	G	A	C	T	T	G	A	A	A	G	A	G	C	C	A	C
745	Delta	>143481|29662|29890	C	A	A	T	C	T	T	T	A	A	T	C	A	G	T	G	T	G	T	A	A	C	A	T	T	A	G	G	G	A	G	G	A	C	T	T	G	A	A	A	G	A	G	C	C	A	C
746	Delta	>143480|29662|29890	C	A	A	T	C	T	T	T	A	A	T	C	A	G	T	G	T	G	T	A	A	C	A	T	T	A	G	G	G	A	G	G	A	C	T	T	G	A	A	A	G	A	G	C	C	A	C
747	Delta	>143476|29653|29881	C	A	A	T	C	T	T	T	A	A	T	C	A	G	T	G	T	G	T	A	A	C	A	T	T	A	G	G	G	A	G	G	A	C	T	T	G	A	A	A	G	A	G	C	C	A	C
748	Delta	>143475|29662|29890	C	A	A	T	C	T	T	T	A	A	T	C	A	G	T	G	T	G	T	A	A	C	A	T	T	A	G	G	G	A	G	G	A	C	T	T	G	A	A	A	G	A	G	C	C	A	C
749	Delta	>143474|29671|29899	C	A	A	T	C	T	T	T	A	A	T	C	A	G	T	G	T	G	T	A	A	C	A	T	T	A	G	G	G	A	G	G	A	C	T	T	G	A	A	A	G	A	G	C	C	A	C
750	Delta	>143473|29662|29890	C	A	A	T	C	T	T	T	A	A	T	C	A	G	T	G	T	G	T	A	A	C	A	T	T	A	G	G	G	A	G	G	A	C	T	T	G	A	A	A	G	A	G	C	C	A	C
751	Delta	>143472|29671|29899	C	A	A	T	C	T	T	T	A	A	T	C	A	G	T	G	T	G	T	A	A	C	A	T	T	A	G	G	G	A	G	G	A	C	T	T	G	A	A	A	G	A	G	C	C	A	C
752	Delta	>143470|29662|29890	C	A	A	T	C	T	T	T	A	A	T	C	A	G	T	G	T	G	T	A	A	C	A	T	T	A	G	G	G	A	G	G	A	C	T	T	G	A	A	A	G	A	G	C	C	A	C
753	Delta	>143469|29662|29890	C	A	A	T	C	T	T	T	A	A	T	C	A	G	T	G	T	G	T	A	A	C	A	T	T	A	G	G	G	A	G	G	A	C	T	T	G	A	A	A	G	A	G	C	C	A	C
754	Delta	>143468|29662|29890	C	A	A	T	C	T	T	T	A	A	T	C	A	G	T	G	T	G	T	A	A	C	A	T	T	A	G	G	G	A	G	G	A	C	T	T	G	A	A	A	G	A	G	C	C	A	C
755	Delta	>143467|29662|29890	C	A	A	T	C	T	T	T	A	A	T	C	A	G	T	G	T	G	T	A	A	C	A	T	T	A	G	G	G	A	G	G	A	C	T	T	G	A	A	A	G	A	G	C	C	A	C
756	Delta	>143466|29662|29890	C	A	A	T	C	T	T	T	A	A	T	C	A	G	T	G	T	G	T	A	A	C	A	T	T	A	G	G	G	A	G	G	A	C	T	T	G	A	A	A	G	A	G	C	C	A	C
757	Delta	>143465|29662|29890	C	A	A	T	C	T	T	T	A	A	T	C	A	G	T	G	T	G	T	A	A	C	A	T	T	A	G	G	G	A	G	G	A	C	T	T	G	A	A	A	G	A	G	C	C	A	C
758	Delta	>143462|29662|29890	C	A	A	T	C	T	T	T	A	A	T	C	A	G	T	G	T	G	T	A	A	C	A	T	T	A	G	G	G	A	G	G	A	C	T	T	G	A	A	A	G	A	G	C	C	A	C
759	Delta	>143461|29662|29890	C	A	A	T	C	T	T	T	A	A	T	C	A	G	T	G	T	G	T	A	A	C	A	T	T	A	G	G	G	A	G	G	A	C	T	T	G	A	A	A	G	A	G	C	C	A	C
760	Delta	>143460|29662|29890	C	A	A	T	C	T	T	T	A	A	T	C	A	G	T	G	T	G	T	A	A	C	A	T	T	A	G	G	G	A	G	G	A	C	T	T	G	A	A	A	G	A	G	C	C	A	C
761	Delta	>143458|29662|29890	C	A	A	T	C	T	T	T	A	A	T	C	A	G	T	G	T	G	T	A	A	C	A	T	T	A	G	G	G	A	G	G	A	C	T	T	G	A	A	A	G	A	G	C	C	A	C
762	Delta	>143456|29662|29890	C	A	A	T	C	T	T	T	A	A	T	C	A	G	T	G	T	G	T	A	A	C	A	T	T	A	G	G	G	A	G	G	A	C	T	T	G	A	A	A	G	A	G	C	C	A	C
763	Delta	>143455|29662|29890	C	A	A	T	C	T	T	T	A	A	T	C	A	G	T	G	T	G	T	A	A	C	A	T	T	A	G	G	G	A	G	G	A	C	T	T	G	A	A	A	G	A	G	C	C	A	C
764	Delta	>143452|29653|29881	C	A	A	T	C	T	T	T	A	A	T	C	A	G	T	G	T	G	T	A	A	C	A	T	T	A	G	G	G	A	G	G	A	C	T	T	G	A	A	A	G	A	G	C	C	A	C
765	Delta	>143451|29662|29890	C	A	A	T	C	T	T	T	A	A	T	C	A	G	T	G	T	G	T	A	A	C	A	T	T	A	G	G	G	A	G	G	A	C	T	T	G	A	A	A	G	A	G	C	C	A	C
766	Delta	>143448|29662|29890	C	A	A	T	C	T	T	T	A	A	T	C	A	G	T	G	T	G	T	A	A	C	A	T	T	A	G	G	G	A	G	G	A	C	T	T	G	A	A	A	G	A	G	C	C	A	C
767	Delta	>143447|29662|29890	C	A	A	T	C	T	T	T	A	A	T	C	A	G	T	G	T	G	T	A	A	C	A	T	T	A	G	G	G	A	G	G	A	C	T	T	G	A	A	A	G	A	G	C	C	A	C
768	Delta	>143446|29662|29890	C	A	A	T	C	T	T	T	A	A	T	C	A	G	T	G	T	G	T	A	A	C	A	T	T	A	G	G	G	A	G	G	A	C	T	T	G	A	A	A	G	A	G	C	C	A	C
769	Delta	>143445|29662|29890	C	A	A	T	C	T	T	T	A	A	T	C	A	G	T	G	T	G	T	A	A	C	A	T	T	A	G	G	G	A	G	G	A	C	T	T	G	A	A	A	G	A	G	C	C	A	C
770	Delta	>143444|29662|29890	C	A	A	T	C	T	T	T	A	A	T	C	A	G	T	G	T	G	T	A	A	C	A	T	T	A	G	G	G	A	G	G	A	C	T	T	G	A	A	A	G	A	G	C	C	A	C
771	Delta	>143443|29662|29890	C	A	A	T	C	T	T	T	A	A	T	C	A	G	T	G	T	G	T	A	A	C	A	T	T	A	G	G	G	A	G	G	A	C	T	T	G	A	A	A	G	A	G	C	C	A	C
772	Delta	>143442|29659|29887	C	A	A	T	C	T	T	T	A	A	T	C	A	G	T	G	T	G	T	A	A	C	A	T	T	A	G	G	G	A	G	G	A	C	T	T	G	A	A	A	G	A	G	C	C	A	C
773	Delta	>143441|29671|29899	C	A	A	T	C	T	T	T	A	A	T	C	A	G	T	G	T	G	T	A	A	C	A	T	T	A	G	G	G	A	G	G	A	C	T	T	G	A	A	A	G	A	G	C	C	A	C
774	Delta	>143439|29662|29890	C	A	A	T	C	T	T	T	A	A	T	C	A	G	T	G	T	G	T	A	A	C	A	T	T	A	G	G	G	A	G	G	A	C	T	T	G	A	A	A	G	A	G	C	C	A	C
775	Delta	>143438|29662|29890	C	A	A	T	C	T	T	T	A	A	T	C	A	G	T	G	T	G	T	A	A	C	A	T	T	A	G	G	G	A	G	G	A	C	T	T	G	A	A	A	G	A	G	C	C	A	C
776	Delta	>143437|29662|29890	C	A	A	T	C	T	T	T	A	A	T	C	A	G	T	G	T	G	T	A	A	C	A	T	T	A	G	G	G	A	G	G	A	C	T	T	G	A	A	A	G	A	G	C	C	A	C
777	Delta	>143436|29662|29890	C	A	A	T	C	T	T	T	A	A	T	C	A	G	T	G	T	G	T	A	A	C	A	T	T	A	G	G	G	A	G	G	A	C	T	T	G	A	A	A	G	A	G	C	C	A	C
778	Delta	>143435|29662|29890	C	A	A	T	C	T	T	T	A	A	T	C	A	G	T	G	T	G	T	A	A	C	A	T	T	A	G	G	G	A	G	G	A	C	T	T	G	A	A	A	G	A	G	C	C	A	C
779	Delta	>143433|29662|29890	C	A	A	T	C	T	T	T	A	A	T	C	A	G	T	G	T	G	T	A	A	C	A	T	T	A	G	G	G	A	G	G	A	C	T	T	G	A	A	A	G	A	G	C	C	A	C
780	Delta	>143431|29662|29890	C	A	A	T	C	T	T	T	A	A	T	C	A	G	T	G	T	G	T	A	A	C	A	T	T	A	G	G	G	A	G	G	A	C	T	T	G	A	A	A	G	A	G	C	C	A	C
781	Delta	>143429|29662|29890	C	A	A	T	C	T	T	T	A	A	T	C	A	G	T	G	T	G	T	A	A	C	A	T	T	A	G	G	G	A	G	G	A	C	T	T	G	A	A	A	G	A	G	C	C	A	C
782	Delta	>143427|29662|29890	C	A	A	T	C	T	T	T	A	A	T	C	A	G	T	G	T	G	T	A	A	C	A	T	T	A	G	G	G	A	G	G	A	C	T	T	G	A	A	A	G	A	G	C	C	A	C
783	Delta	>143426|29662|29890	C	A	A	T	C	T	T	T	A	A	T	C	A	G	T	G	T	G	T	A	A	C	A	T	T	A	G	G	G	A	G	G	A	C	T	T	G	A	A	A	G	A	G	C	C	A	C
784	Delta	>143425|29662|29890	C	A	A	T	C	T	T	T	A	A	T	C	A	G	T	G	T	G	T	A	A	C	A	T	T	A	G	G	G	A	G	G	A	C	T	T	G	A	A	A	G	A	G	C	C	A	C
785	Delta	>143422|29662|29890	C	A	A	T	C	T	T	T	A	A	T	C	A	G	T	G	T	G	T	A	A	C	A	T	T	A	G	G	G	A	G	G	A	C	T	T	G	A	A	A	G	A	G	C	C	A	C
786	Delta	>143421|29662|29890	C	A	A	T	C	T	T	T	A	A	T	C	A	G	T	G	T	G	T	A	A	C	A	T	T	A	G	G	G	A	G	G	A	C	T	T	G	A	A	A	G	A	G	C	C	A	C
787	Delta	>143420|29662|29890	C	A	A	T	C	T	T	T	A	A	T	C	A	G	T	G	T	G	T	A	A	C	A	T	T	A	G	G	G	A	G	G	A	C	T	T	G	A	A	A	G	A	G	C	C	A	C
788	Delta	>143419|29662|29890	C	A	A	T	C	T	T	T	A	A	T	C	A	G	T	G	T	G	T	A	A	C	A	T	T	A	G	G	G	A	G	G	A	C	T	T	G	A	A	A	G	A	G	C	C	A	C
789	Delta	>143417|29656|29884	C	A	A	T	C	T	T	T	A	A	T	C	A	G	T	G	T	G	T	A	A	C	A	T	T	A	G	G	G	A	G	G	A	C	T	T	G	A	A	A	G	A	G	C	C	A	C
790	Delta	>143416|29662|29890	C	A	A	T	C	T	T	T	A	A	T	C	A	G	T	G	T	G	T	A	A	C	A	T	T	A	G	G	G	A	G	G	A	C	T	T	G	A	A	A	G	A	G	C	C	A	C
791	Delta	>143414|29662|29890	C	A	A	T	C	T	T	T	A	A	T	C	A	G	T	G	T	G	T	A	A	C	A	T	T	A	G	G	G	A	G	G	A	C	T	T	G	A	A	A	G	A	G	C	C	A	C
792	Delta	>143413|29659|29887	C	A	A	T	C	T	T	T	A	A	T	C	A	G	T	G	T	G	T	A	A	C	A	T	T	A	G	G	G	A	G	G	A	C	T	T	G	A	A	A	G	A	G	C	C	A	C
793	Delta	>143412|29659|29887	C	A	A	T	C	T	T	T	A	A	T	C	A	G	T	G	T	G	T	A	A	C	A	T	T	A	G	G	G	A	G	G	A	C	T	T	G	A	A	A	G	A	G	C	C	A	C
794	Delta	>143410|29653|29881	C	A	A	T	C	T	T	T	A	A	T	C	A	G	T	G	T	G	T	A	A	C	A	T	T	A	G	G	G	A	G	G	A	C	T	T	G	A	A	A	G	A	G	C	C	A	C
795	Delta	>143408|29662|29890	C	A	A	T	C	T	T	T	A	A	T	C	A	G	T	G	T	G	T	A	A	C	A	T	T	A	G	G	G	A	G	G	A	C	T	T	G	A	A	A	G	A	G	C	C	A	C
796	Delta	>143407|29662|29890	C	A	A	T	C	T	T	T	A	A	T	C	A	G	T	G	T	G	T	A	A	C	A	T	T	A	G	G	G	A	G	G	A	C	T	T	G	A	A	A	G	A	G	C	C	A	C
797	Delta	>143406|29662|29890	C	A	A	T	C	T	T	T	A	A	T	C	A	G	T	G	T	G	T	A	A	C	A	T	T	A	G	G	G	A	G	G	A	C	T	T	G	A	A	A	G	A	G	C	C	A	C
798	Delta	>143404|29662|29890	C	A	A	T	C	T	T	T	A	A	T	C	A	G	T	G	T	G	T	A	A	C	A	T	T	A	G	G	G	A	G	G	A	C	T	T	G	A	A	A	G	A	G	C	C	A	C
799	Delta	>143403|29662|29890	C	A	A	T	C	T	T	T	A	A	T	C	A	G	T	G	T	G	T	A	A	C	A	T	T	A	G	G	G	A	G	G	A	C	T	T	G	A	A	A	G	A	G	C	C	A	C
800	Delta	>143402|29662|29890	C	A	A	T	C	T	T	T	A	A	T	C	A	G	T	G	T	G	T	A	A	C	A	T	T	A	G	G	G	A	G	G	A	C	T	T	G	A	A	A	G	A	G	C	C	A	C
801	Delta	>143401|29662|29890	C	A	A	T	C	T	T	T	A	A	T	C	A	G	T	G	T	G	T	A	A	C	A	T	T	A	G	G	G	A	G	G	A	C	T	T	G	A	A	A	G	A	G	C	C	A	C
802	Delta	>143400|29662|29890	C	A	A	T	C	T	T	T	A	A	T	C	A	G	T	G	T	G	T	A	A	C	A	T	T	A	G	G	G	A	G	G	A	C	T	T	G	A	A	A	G	A	G	C	C	A	C
803	Delta	>143398|29662|29890	C	A	A	T	C	T	T	T	A	A	T	C	A	G	T	G	T	G	T	A	A	C	A	T	T	A	G	G	G	A	G	G	A	C	T	T	G	A	A	A	G	A	G	C	C	A	C
804	Delta	>143397|29662|29890	C	A	A	T	C	T	T	T	A	A	T	C	A	G	T	G	T	G	T	A	A	C	A	T	T	A	G	G	G	A	G	G	A	C	T	T	G	A	A	A	G	A	G	C	C	A	C
805	Delta	>143396|29662|29890	C	A	A	T	C	T	T	T	A	A	T	C	A	G	T	G	T	G	T	A	A	C	A	T	T	A	G	G	G	A	G	G	A	C	T	T	G	A	A	A	G	A	G	C	C	A	C
806	Delta	>143395|29662|29890	C	A	A	T	C	T	T	T	A	A	T	C	A	G	T	G	T	G	T	A	A	C	A	T	T	A	G	G	G	A	G	G	A	C	T	T	G	A	A	A	G	A	G	C	C	A	C
807	Delta	>143394|29662|29890	C	A	A	T	C	T	T	T	A	A	T	C	A	G	T	G	T	G	T	A	A	C	A	T	T	A	G	G	G	A	G	G	A	C	T	T	G	A	A	A	G	A	G	C	C	A	C
808	Delta	>143393|29668|29896	C	A	A	T	C	T	T	T	A	A	T	C	A	G	T	G	T	G	T	A	A	C	A	T	T	A	G	G	G	A	G	G	A	C	T	T	G	A	A	A	G	A	G	C	C	A	C
809	Delta	>143392|29662|29890	C	A	A	T	C	T	T	T	A	A	T	C	A	G	T	G	T	G	T	A	A	C	A	T	T	A	G	G	G	A	G	G	A	C	T	T	G	A	A	A	G	A	G	C	C	A	C
810	Delta	>143391|29662|29890	C	A	A	T	C	T	T	T	A	A	T	C	A	G	T	G	T	G	T	A	A	C	A	T	T	A	G	G	G	A	G	G	A	C	T	T	G	A	A	A	G	A	G	C	C	A	C
811	Delta	>143390|29662|29890	C	A	A	T	C	T	T	T	A	A	T	C	A	G	T	G	T	G	T	A	A	C	A	T	T	A	G	G	G	A	G	G	A	C	T	T	G	A	A	A	G	A	G	C	C	A	C
812	Delta	>143388|29662|29890	C	A	A	T	C	T	T	T	A	A	T	C	A	G	T	G	T	G	T	A	A	C	A	T	T	A	G	G	G	A	G	G	A	C	T	T	G	A	A	A	G	A	G	C	C	A	C
813	Delta	>143387|29662|29890	C	A	A	T	C	T	T	T	A	A	T	C	A	G	T	G	T	G	T	A	A	C	A	T	T	A	G	G	G	A	G	G	A	C	T	T	G	A	A	A	G	A	G	C	C	A	C
814	Delta	>143386|29662|29890	C	A	A	T	C	T	T	T	A	A	T	C	A	G	T	G	T	G	T	A	A	C	A	T	T	A	G	G	G	A	G	G	A	C	T	T	G	A	A	A	G	A	G	C	C	A	C
815	Delta	>143385|29662|29890	C	A	A	T	C	T	T	T	A	A	T	C	A	G	T	G	T	G	T	A	A	C	A	T	T	A	G	G	G	A	G	G	A	C	T	T	G	A	A	A	G	A	G	C	C	A	C
816	Delta	>143384|29662|29890	C	A	A	T	C	T	T	T	A	A	T	C	A	G	T	G	T	G	T	A	A	C	A	T	T	A	G	G	G	A	G	G	A	C	T	T	G	A	A	A	G	A	G	C	C	A	C
817	Delta	>143383|29662|29890	C	A	A	T	C	T	T	T	A	A	T	C	A	G	T	G	T	G	T	A	A	C	A	T	T	A	G	G	G	A	G	G	A	C	T	T	G	A	A	A	G	A	G	C	C	A	C
818	Delta	>143382|29662|29890	C	A	A	T	C	T	T	T	A	A	T	C	A	G	T	G	T	G	T	A	A	C	A	T	T	A	G	G	G	A	G	G	A	C	T	T	G	A	A	A	G	A	G	C	C	A	C
819	Delta	>143381|29662|29890	C	A	A	T	C	T	T	T	A	A	T	C	A	G	T	G	T	G	T	A	A	C	A	T	T	A	G	G	G	A	G	G	A	C	T	T	G	A	A	A	G	A	G	C	C	A	C
820	Delta	>143380|29662|29890	C	A	A	T	C	T	T	T	A	A	T	C	A	G	T	G	T	G	T	A	A	C	A	T	T	A	G	G	G	A	G	G	A	C	T	T	G	A	A	A	G	A	G	C	C	A	C
821	Delta	>143379|29662|29890	C	A	A	T	C	T	T	T	A	A	T	C	A	G	T	G	T	G	T	A	A	C	A	T	T	A	G	G	G	A	G	G	A	C	T	T	G	A	A	A	G	A	G	C	C	A	C
822	Delta	>143378|29656|29884	C	A	A	T	C	T	T	T	A	A	T	C	A	G	T	G	T	G	T	A	A	C	A	T	T	A	G	G	G	A	G	G	A	C	T	T	G	A	A	A	G	A	G	C	C	A	C
823	Delta	>143377|29656|29884	C	A	A	T	C	T	T	T	A	A	T	C	A	G	T	G	T	G	T	A	A	C	A	T	T	A	G	G	G	A	G	G	A	C	T	T	G	A	A	A	G	A	G	C	C	A	C
824	Delta	>143376|29662|29890	C	A	A	T	C	T	T	T	A	A	T	C	A	G	T	G	T	G	T	A	A	C	A	T	T	A	G	G	G	A	G	G	A	C	T	T	G	A	A	A	G	A	G	C	C	A	C
825	Delta	>143375|29656|29884	C	A	A	T	C	T	T	T	A	A	T	C	A	G	T	G	T	G	T	A	A	C	A	T	T	A	G	G	G	A	G	G	A	C	T	T	G	A	A	A	G	A	G	C	C	A	C
826	Delta	>143374|29662|29890	C	A	A	T	C	T	T	T	A	A	T	C	A	G	T	G	T	G	T	A	A	C	A	T	T	A	G	G	G	A	G	G	A	C	T	T	G	A	A	A	G	A	G	C	C	A	C
827	Delta	>143373|29662|29890	C	A	A	T	C	T	T	T	A	A	T	C	A	G	T	G	T	G	T	A	A	C	A	T	T	A	G	G	G	A	G	G	A	C	T	T	G	A	A	A	G	A	G	C	C	A	C
828	Delta	>143372|29662|29890	C	A	A	T	C	T	T	T	A	A	T	C	A	G	T	G	T	G	T	A	A	C	A	T	T	A	G	G	G	A	G	G	A	C	T	T	G	A	A	A	G	A	G	C	C	A	C
829	Delta	>143371|29662|29890	C	A	A	T	C	T	T	T	A	A	T	C	A	G	T	G	T	G	T	A	A	C	A	T	T	A	G	G	G	A	G	G	A	C	T	T	G	A	A	A	G	A	G	C	C	A	C
830	Delta	>143370|29656|29884	C	A	A	T	C	T	T	T	A	A	T	C	A	G	T	G	T	G	T	A	A	C	A	T	T	A	G	G	G	A	G	G	A	C	T	T	G	A	A	A	G	A	G	C	C	A	C
831	Delta	>143369|29662|29890	C	A	A	T	C	T	T	T	A	A	T	C	A	G	T	G	T	G	T	A	A	C	A	T	T	A	G	G	G	A	G	G	A	C	T	T	G	A	A	A	G	A	G	C	C	A	C
832	Delta	>143368|29662|29890	C	A	A	T	C	T	T	T	A	A	T	C	A	G	T	G	T	G	T	A	A	C	A	T	T	A	G	G	G	A	G	G	A	C	T	T	G	A	A	A	G	A	G	C	C	A	C
833	Delta	>143367|29662|29890	C	A	A	T	C	T	T	T	A	A	T	C	A	G	T	G	T	G	T	A	A	C	A	T	T	A	G	G	G	A	G	G	A	C	T	T	G	A	A	A	G	A	G	C	C	A	C
834	Delta	>143366|29662|29890	C	A	A	T	C	T	T	T	A	A	T	C	A	G	T	G	T	G	T	A	A	C	A	T	T	A	G	G	G	A	G	G	A	C	T	T	G	A	A	A	G	A	G	C	C	A	C
835	Delta	>143365|29662|29890	C	A	A	T	C	T	T	T	A	A	T	C	A	G	T	G	T	G	T	A	A	C	A	T	T	A	G	G	G	A	G	G	A	C	T	T	G	A	A	A	G	A	G	C	C	A	C
836	Delta	>143364|29662|29890	C	A	A	T	C	T	T	T	A	A	T	C	A	G	T	G	T	G	T	A	A	C	A	T	T	A	G	G	G	A	G	G	A	C	T	T	G	A	A	A	G	A	G	C	C	A	C
837	Delta	>143363|29662|29890	C	A	A	T	C	T	T	T	A	A	T	C	A	G	T	G	T	G	T	A	A	C	A	T	T	A	G	G	G	A	G	G	A	C	T	T	G	A	A	A	G	A	G	C	C	A	C
838	Delta	>143362|29659|29887	C	A	A	T	C	T	T	T	A	A	T	C	A	G	T	G	T	G	T	A	A	C	A	T	T	A	G	G	G	A	G	G	A	C	T	T	G	A	A	A	G	A	G	C	C	A	C
839	Delta	>143361|29662|29890	C	A	A	T	C	T	T	T	A	A	T	C	A	G	T	G	T	G	T	A	A	C	A	T	T	A	G	G	G	A	G	G	A	C	T	T	G	A	A	A	G	A	G	C	C	A	C
840	Delta	>143360|29662|29890	C	A	A	T	C	T	T	T	A	A	T	C	A	G	T	G	T	G	T	A	A	C	A	T	T	A	G	G	G	A	G	G	A	C	T	T	G	A	A	A	G	A	G	C	C	A	C
841	Delta	>143359|29662|29890	C	A	A	T	C	T	T	T	A	A	T	C	A	G	T	G	T	G	T	A	A	C	A	T	T	A	G	G	G	A	G	G	A	C	T	T	G	A	A	A	G	A	G	C	C	A	C
842	Delta	>143358|29662|29890	C	A	A	T	C	T	T	T	A	A	T	C	A	G	T	G	T	G	T	A	A	C	A	T	T	A	G	G	G	A	G	G	A	C	T	T	G	A	A	A	G	A	G	C	C	A	C
843	Delta	>143356|29662|29890	C	A	A	T	C	T	T	T	A	A	T	C	A	G	T	G	T	G	T	A	A	C	A	T	T	A	G	G	G	A	G	G	A	C	T	T	G	A	A	A	G	A	G	C	C	A	C
844	Delta	>143355|29662|29890	C	A	A	T	C	T	T	T	A	A	T	C	A	G	T	G	T	G	T	A	A	C	A	T	T	A	G	G	G	A	G	G	A	C	T	T	G	A	A	A	G	A	G	C	C	A	C
845	Delta	>143354|29662|29890	C	A	A	T	C	T	T	T	A	A	T	C	A	G	T	G	T	G	T	A	A	C	A	T	T	A	G	G	G	A	G	G	A	C	T	T	G	A	A	A	G	A	G	C	C	A	C
846	Delta	>143353|29662|29890	C	A	A	T	C	T	T	T	A	A	T	C	A	G	T	G	T	G	T	A	A	C	A	T	T	A	G	G	G	A	G	G	A	C	T	T	G	A	A	A	G	A	G	C	C	A	C
847	Delta	>143352|29662|29890	C	A	A	T	C	T	T	T	A	A	T	C	A	G	T	G	T	G	T	A	A	C	A	T	T	A	G	G	G	A	G	G	A	C	T	T	G	A	A	A	G	A	G	C	C	A	C
848	Delta	>143351|29662|29890	C	A	A	T	C	T	T	T	A	A	T	C	A	G	T	G	T	G	T	A	A	C	A	T	T	A	G	G	G	A	G	G	A	C	T	T	G	A	A	A	G	A	G	C	C	A	C
849	Delta	>143350|29662|29890	C	A	A	T	C	T	T	T	A	A	T	C	A	G	T	G	T	G	T	A	A	C	A	T	T	A	G	G	G	A	G	G	A	C	T	T	G	A	A	A	G	A	G	C	C	A	C
850	Delta	>143347|29662|29890	C	A	A	T	C	T	T	T	A	A	T	C	A	G	T	G	T	G	T	A	A	C	A	T	T	A	G	G	G	A	G	G	A	C	T	T	G	A	A	A	G	A	G	C	C	A	C
851	Delta	>143346|29662|29890	C	A	A	T	C	T	T	T	A	A	T	C	A	G	T	G	T	G	T	A	A	C	A	T	T	A	G	G	G	A	G	G	A	C	T	T	G	A	A	A	G	A	G	C	C	A	C
852	Delta	>143345|29662|29890	C	A	A	T	C	T	T	T	A	A	T	C	A	G	T	G	T	G	T	A	A	C	A	T	T	A	G	G	G	A	G	G	A	C	T	T	G	A	A	A	G	A	G	C	C	A	C
853	Delta	>143344|29662|29890	C	A	A	T	C	T	T	T	A	A	T	C	A	G	T	G	T	G	T	A	A	C	A	T	T	A	G	G	G	A	G	G	A	C	T	T	G	A	A	A	G	A	G	C	C	A	C
854	Delta	>143343|29662|29890	C	A	A	T	C	T	T	T	A	A	T	C	A	G	T	G	T	G	T	A	A	C	A	T	T	A	G	G	G	A	G	G	A	C	T	T	G	A	A	A	G	A	G	C	C	A	C
855	Delta	>143342|29662|29890	C	A	A	T	C	T	T	T	A	A	T	C	A	G	T	G	T	G	T	A	A	C	A	T	T	A	G	G	G	A	G	G	A	C	T	T	G	A	A	A	G	A	G	C	C	A	C
856	Delta	>143341|29662|29890	C	A	A	T	C	T	T	T	A	A	T	C	A	G	T	G	T	G	T	A	A	C	A	T	T	A	G	G	G	A	G	G	A	C	T	T	G	A	A	A	G	A	G	C	C	A	C
857	Delta	>143340|29662|29890	C	A	A	T	C	T	T	T	A	A	T	C	A	G	T	G	T	G	T	A	A	C	A	T	T	A	G	G	G	A	G	G	A	C	T	T	G	A	A	A	G	A	G	C	C	A	C
858	Delta	>143339|29662|29890	C	A	A	T	C	T	T	T	A	A	T	C	A	G	T	G	T	G	T	A	A	C	A	T	T	A	G	G	G	A	G	G	A	C	T	T	G	A	A	A	G	A	G	C	C	A	C
859	Delta	>143338|29662|29890	C	A	A	T	C	T	T	T	A	A	T	C	A	G	T	G	T	G	T	A	A	C	A	T	T	A	G	G	G	A	G	G	A	C	T	T	G	A	A	A	G	A	G	C	C	A	C
860	Delta	>143337|29662|29890	C	A	A	T	C	T	T	T	A	A	T	C	A	G	T	G	T	G	T	A	A	C	A	T	T	A	G	G	G	A	G	G	A	C	T	T	G	A	A	A	G	A	G	C	C	A	C
861	Delta	>143336|29656|29884	C	A	A	T	C	T	T	T	A	A	T	C	A	G	T	G	T	G	T	A	A	C	A	T	T	A	G	G	G	A	G	G	A	C	T	T	G	A	A	A	G	A	G	C	C	A	C
862	Delta	>143283|29645|29873	C	A	A	T	C	T	T	T	A	A	T	C	A	G	T	G	T	G	T	A	A	C	A	T	T	A	G	G	G	A	G	G	A	C	T	T	G	A	A	A	G	A	G	C	C	A	C
863	Delta	>143282|29653|29881	C	A	A	T	C	T	T	T	A	A	T	C	A	G	T	G	T	G	T	A	A	C	A	T	T	A	G	G	G	A	G	G	A	C	T	T	G	A	A	A	G	A	G	C	C	A	C
864	Delta	>143281|29653|29881	C	A	A	T	C	T	T	T	A	A	T	C	A	G	T	G	T	G	T	A	A	C	A	T	T	A	G	G	G	A	G	G	A	C	T	T	G	A	A	A	G	A	G	C	C	A	C
865	Delta	>143279|29654|29882	C	A	A	T	C	T	T	T	A	A	T	C	A	G	T	G	T	G	T	A	A	C	A	T	T	A	G	G	G	A	G	G	A	C	T	T	G	A	A	A	G	A	G	C	C	A	C
866	Delta	>143278|29655|29883	C	A	A	T	C	T	T	T	A	A	T	C	A	G	T	G	T	G	T	A	A	C	A	T	T	A	G	G	G	A	G	G	A	C	T	T	G	A	A	A	G	A	G	C	C	A	C
867	Delta	>143277|29658|29886	C	A	A	T	C	T	T	T	A	A	T	C	A	G	T	G	T	G	T	A	A	C	A	T	T	A	G	G	G	A	G	G	A	C	T	T	G	A	A	A	G	A	G	C	C	A	C
868	Delta	>143276|29658|29886	C	A	A	T	C	T	T	T	A	A	T	C	A	G	T	G	T	G	T	A	A	C	A	T	T	A	G	G	G	A	G	G	A	C	T	T	G	A	A	A	G	A	G	C	C	A	C
869	Delta	>143275|29652|29880	C	A	A	T	C	T	T	T	A	A	T	C	A	G	T	G	T	G	T	A	A	C	A	T	T	A	G	G	G	A	G	G	A	C	T	T	G	A	A	A	G	A	G	C	C	A	C
870	Delta	>143274|29653|29881	C	A	A	T	C	T	T	T	A	A	T	C	A	G	T	G	T	G	T	A	A	C	A	T	T	A	G	G	G	A	G	G	A	C	T	T	G	A	A	A	G	A	G	C	C	A	C
871	Delta	>143273|29652|29880	C	A	A	T	C	T	T	T	A	A	T	C	A	G	T	G	T	G	T	A	A	C	A	T	T	A	G	G	G	A	G	G	A	C	T	T	G	A	A	A	G	A	G	C	C	A	C
872	Delta	>143272|29651|29879	C	A	A	T	C	T	T	T	A	A	T	C	A	G	T	G	T	G	T	A	A	C	A	T	T	A	G	G	G	A	G	G	A	C	T	T	G	A	A	A	G	A	G	C	C	A	C
873	Delta	>143271|29652|29880	C	A	A	T	C	T	T	T	A	A	T	C	A	G	T	G	T	G	T	A	A	C	A	T	T	A	G	G	G	A	G	G	A	C	T	T	G	A	A	A	G	A	G	C	C	A	C
874	Delta	>143270|29654|29882	C	A	A	T	C	T	T	T	A	A	T	C	A	G	T	G	T	G	T	A	A	C	A	T	T	A	G	G	G	A	G	G	A	C	T	T	G	A	A	A	G	A	G	C	C	A	C
875	Delta	>143269|29652|29880	C	A	A	T	C	T	T	T	A	A	T	C	A	G	T	G	T	G	T	A	A	C	A	T	T	A	G	G	G	A	G	G	A	C	T	T	G	A	A	A	G	A	G	C	C	A	C
876	Delta	>143256|29660|29888	C	A	A	T	C	T	T	T	A	A	T	C	A	G	T	G	T	G	T	A	A	C	A	T	T	A	G	G	G	A	G	G	A	C	T	T	G	A	A	A	G	A	G	C	C	A	C
877	Delta	>143043|29662|29890	C	A	A	T	C	T	T	T	A	A	T	C	A	G	T	G	T	G	T	A	A	C	A	T	T	A	G	G	G	A	G	G	A	C	T	T	G	A	A	A	G	A	G	C	C	A	C
878	Delta	>143041|29660|29888	C	A	A	T	C	T	T	T	A	A	T	C	A	G	T	G	T	G	T	A	A	C	A	T	T	A	G	G	G	A	G	G	A	C	T	T	G	A	A	A	G	A	G	C	C	A	C
879	Delta	>143039|29657|29885	C	A	A	T	C	T	T	T	A	A	T	C	A	G	T	G	T	G	T	A	A	C	A	T	T	A	G	G	G	A	G	G	A	C	T	T	G	A	A	A	G	A	G	C	C	A	C
880	Delta	>143038|29668|29896	C	A	A	T	C	T	T	T	A	A	T	C	A	G	T	G	T	G	T	A	A	C	A	T	T	A	G	G	G	A	G	G	A	C	T	T	G	A	A	A	G	A	G	C	C	A	C
881	Delta	>143037|29663|29891	C	A	A	T	C	T	T	T	A	A	T	C	A	G	T	G	T	G	T	A	A	C	A	T	T	A	G	G	G	A	G	G	A	C	T	T	G	A	A	A	G	A	G	C	C	A	C
882	Delta	>143036|29663|29891	C	A	A	T	C	T	T	T	A	A	T	C	A	G	T	G	T	G	T	A	A	C	A	T	T	A	G	G	G	A	G	G	A	C	T	T	G	A	A	A	G	A	G	C	C	A	C
883	Delta	>143035|29663|29891	C	A	A	T	C	T	T	T	A	A	T	C	A	G	T	G	T	G	T	A	A	C	A	T	T	A	G	G	G	A	G	G	A	C	T	T	G	A	A	A	G	A	G	C	C	A	C
884	Delta	>143034|29663|29891	C	A	A	T	C	T	T	T	A	A	T	C	A	G	T	G	T	G	T	A	A	C	A	T	T	A	G	G	G	A	G	G	A	C	T	T	G	A	A	A	G	A	G	C	C	A	C
885	Delta	>142687|29657|29885	C	A	A	T	C	T	T	T	A	A	T	C	A	G	T	G	T	G	T	A	A	C	A	T	T	A	G	G	G	A	G	G	A	C	T	T	G	A	A	A	G	A	G	C	C	A	C
886	Delta	>142685|29662|29890	C	A	A	T	C	T	T	T	A	A	T	C	A	G	T	G	T	G	T	A	A	C	A	T	T	A	G	G	G	A	G	G	A	C	T	T	G	A	A	A	G	A	G	C	C	A	C
887	Delta	>142682|29662|29890	C	A	A	T	C	T	T	T	A	A	T	C	A	G	T	G	T	G	T	A	A	C	A	T	T	A	G	G	G	A	G	G	A	C	T	T	G	A	A	A	G	A	G	C	C	A	C
888	Delta	>142675|29662|29890	C	A	A	T	C	T	T	T	A	A	T	C	A	G	T	G	T	G	T	A	A	C	A	T	T	A	G	G	G	A	G	G	A	C	T	T	G	A	A	A	G	A	G	C	C	A	C
889	Delta	>142637|29662|29890	C	A	A	T	C	T	T	T	A	A	T	C	A	G	T	G	T	G	T	A	A	C	A	T	T	A	G	G	G	A	G	G	A	C	T	T	G	A	A	A	G	A	G	C	C	A	C
890	Delta	>142636|29662|29890	C	A	A	T	C	T	T	T	A	A	T	C	A	G	T	G	T	G	T	A	A	C	A	T	T	A	G	G	G	A	G	G	A	C	T	T	G	A	A	A	G	A	G	C	C	A	C
891	Delta	>142628|29655|29883	C	A	A	T	C	T	T	T	A	A	T	C	A	G	T	G	T	G	T	A	A	C	A	T	T	A	G	G	G	A	G	G	A	C	T	T	G	A	A	A	G	A	G	C	C	A	C
892	Delta	>142626|29663|29891	C	A	A	T	C	T	T	T	A	A	T	C	A	G	T	G	T	G	T	A	A	C	A	T	T	A	G	G	G	A	G	G	A	C	T	T	G	A	A	A	G	A	G	C	C	A	C
893	Delta	>142618|29663|29891	C	A	A	T	C	T	T	T	A	A	T	C	A	G	T	G	T	G	T	A	A	C	A	T	T	A	G	G	G	A	G	G	A	C	T	T	G	A	A	A	G	A	G	C	C	A	C
894	Delta	>142616|29663|29891	C	A	A	T	C	T	T	T	A	A	T	C	A	G	T	G	T	G	T	A	A	C	A	T	T	A	G	G	G	A	G	G	A	C	T	T	G	A	A	A	G	A	G	C	C	A	C
895	Delta	>142615|29663|29891	C	A	A	T	C	T	T	T	A	A	T	C	A	G	T	G	T	G	T	A	A	C	A	T	T	A	G	G	G	A	G	G	A	C	T	T	G	A	A	A	G	A	G	C	C	A	C
896	Delta	>142612|29662|29890	C	A	A	T	C	T	T	T	A	A	T	C	A	G	T	G	T	G	T	A	A	C	A	T	T	A	G	G	G	A	G	G	A	C	T	T	G	A	A	A	G	A	G	C	C	A	C
897	Delta	>142605|29660|29888	C	A	A	T	C	T	T	T	A	A	T	C	A	G	T	G	T	G	T	A	A	C	A	T	T	A	G	G	G	A	G	G	A	C	T	T	G	A	A	A	G	A	G	C	C	A	C
898	Delta	>142106|29669|29897	C	A	A	T	C	T	T	T	A	A	T	C	A	G	T	G	T	G	T	A	A	C	A	T	T	A	G	G	G	A	G	G	A	C	T	T	G	A	A	A	G	A	G	C	C	A	C
899	Delta	>142104|29669|29897	C	A	A	T	C	T	T	T	A	A	T	C	A	G	T	G	T	G	T	A	A	C	A	T	T	A	G	G	G	A	G	G	A	C	T	T	G	A	A	A	G	A	G	C	C	A	C
900	Delta	>142100|29662|29890	C	A	A	T	C	T	T	T	A	A	T	C	A	G	T	G	T	G	T	A	A	C	A	T	T	A	G	G	G	A	G	G	A	C	T	T	G	A	A	A	G	A	G	C	C	A	C
901	Delta	>142085|29627|29855	C	A	A	T	C	T	T	T	A	A	T	C	A	G	T	G	T	G	T	A	A	C	A	T	T	A	G	G	G	A	G	G	A	C	T	T	G	A	A	A	G	A	G	C	C	A	C
902	Delta	>142084|29634|29862	C	A	A	T	C	T	T	T	A	A	T	C	A	G	T	G	T	G	T	A	A	C	A	T	T	A	G	G	G	A	G	G	A	C	T	T	G	A	A	A	G	A	G	C	C	A	C
903	Delta	>142083|29659|29887	C	A	A	T	C	T	T	T	A	A	T	C	A	G	T	G	T	G	T	A	A	C	A	T	T	A	G	G	G	A	G	G	A	C	T	T	G	A	A	A	G	A	G	C	C	A	C
904	Delta	>142082|29657|29885	C	A	A	T	C	T	T	T	A	A	T	C	A	G	T	G	T	G	T	A	A	C	A	T	T	A	G	G	G	A	G	G	A	C	T	T	G	A	A	A	G	A	G	C	C	A	C
905	Delta	>142023|29663|29891	C	A	A	T	C	T	T	T	A	A	T	C	A	G	T	G	T	G	T	A	A	C	A	T	T	A	G	G	G	A	G	G	A	C	T	T	G	A	A	A	G	A	G	C	C	A	C
906	Delta	>141984|29659|29887	C	A	A	T	C	T	T	T	A	A	T	C	A	G	T	G	T	G	T	A	A	C	A	T	T	A	G	G	G	A	G	G	A	C	T	T	G	A	A	A	G	A	G	C	C	A	C
907	Delta	>141982|29675|29903	C	A	A	T	C	T	T	T	A	A	T	C	A	G	T	G	T	G	T	A	A	C	A	T	T	A	G	G	G	A	G	G	A	C	T	T	G	A	A	A	G	A	G	C	C	A	C
908	Delta	>141894|29662|29890	C	A	A	T	C	T	T	T	A	A	T	C	A	G	T	G	T	G	T	A	A	C	A	T	T	A	G	G	G	A	G	G	A	C	T	T	G	A	A	A	G	A	G	C	C	A	C
909	Delta	>141248|29624|29852	C	A	A	T	C	T	T	T	A	A	T	C	A	G	T	G	T	G	T	A	A	C	A	T	T	A	G	G	G	A	G	G	A	C	T	T	G	A	A	A	G	A	G	C	C	A	C
910	Delta	>139101|29653|29881	C	A	A	T	C	T	T	T	A	A	T	C	A	G	T	G	T	G	T	A	A	C	A	T	T	A	G	G	G	A	G	G	A	C	T	T	G	A	A	A	G	A	G	C	C	A	C
911	Delta	>139037|29662|29890	C	A	A	T	C	T	T	T	A	A	T	C	A	G	T	G	T	G	T	A	A	C	A	T	T	A	G	G	G	A	G	G	A	C	T	T	G	A	A	A	G	A	G	C	C	A	C
912	Delta	>138814|29659|29887	C	A	A	T	C	T	T	T	A	A	T	C	A	G	T	G	T	G	T	A	A	C	A	T	T	A	G	G	G	A	G	G	A	C	T	T	G	A	A	A	G	A	G	C	C	A	C
913	Delta	>138812|29661|29889	C	A	A	T	C	T	T	T	A	A	T	C	A	G	T	G	T	G	T	A	A	C	A	T	T	A	G	G	G	A	G	G	A	C	T	T	G	A	A	A	G	A	G	C	C	A	C
914	Delta	>138810|29661|29889	C	A	A	T	C	T	T	T	A	A	T	C	A	G	T	G	T	G	T	A	A	C	A	T	T	A	G	G	G	A	G	G	A	C	T	T	G	A	A	A	G	A	G	C	C	A	C
915	Delta	>138782|29662|29890	C	A	A	T	C	T	T	T	A	A	T	C	A	G	T	G	T	G	T	A	A	C	A	T	T	A	G	G	G	A	G	G	A	C	T	T	G	A	A	A	G	A	G	C	C	A	C
916	Delta	>138780|29662|29890	C	A	A	T	C	T	T	T	A	A	T	C	A	G	T	G	T	G	T	A	A	C	A	T	T	A	G	G	G	A	G	G	A	C	T	T	G	A	A	A	G	A	G	C	C	A	C
917	Delta	>138779|29661|29889	C	A	A	T	C	T	T	T	A	A	T	C	A	G	T	G	T	G	T	A	A	C	A	T	T	A	G	G	G	A	G	G	A	C	T	T	G	A	A	A	G	A	G	C	C	A	C
918	Delta	>138777|29662|29890	C	A	A	T	C	T	T	T	A	A	T	C	A	G	T	G	T	G	T	A	A	C	A	T	T	A	G	G	G	A	G	G	A	C	T	T	G	A	A	A	G	A	G	C	C	A	C
919	Delta	>138659|29660|29888	C	A	A	T	C	T	T	T	A	A	T	C	A	G	T	G	T	G	T	A	A	C	A	T	T	A	G	G	G	A	G	G	A	C	T	T	G	A	A	A	G	A	G	C	C	A	C
920	Delta	>138647|29662|29890	C	A	A	T	C	T	T	T	A	A	T	C	A	G	T	G	T	G	T	A	A	C	A	T	T	A	G	G	G	A	G	G	A	C	T	T	G	A	A	A	G	A	G	C	C	A	C
921	Delta	>138642|29660|29888	C	A	A	T	C	T	T	T	A	A	T	C	A	G	T	G	T	G	T	A	A	C	A	T	T	A	G	G	G	A	G	G	A	C	T	T	G	A	A	A	G	A	G	C	C	A	C
922	Delta	>138640|29659|29887	C	A	A	T	C	T	T	T	A	A	T	C	A	G	T	G	T	G	T	A	A	C	A	T	T	A	G	G	G	A	G	G	A	C	T	T	G	A	A	A	G	A	G	C	C	A	C
923	Delta	>138336|29658|29886	C	A	A	T	C	T	T	T	A	A	T	C	A	G	T	G	T	G	T	A	A	C	A	T	T	A	G	G	G	A	G	G	A	C	T	T	G	A	A	A	G	A	G	C	C	A	C
924	Delta	>138332|29652|29880	C	A	A	T	C	T	T	T	A	A	T	C	A	G	T	G	T	G	T	A	A	C	A	T	T	A	G	G	G	A	G	G	A	C	T	T	G	A	A	A	G	A	G	C	C	A	C
925	Delta	>138327|29661|29889	C	A	A	T	C	T	T	T	A	A	T	C	A	G	T	G	T	G	T	A	A	C	A	T	T	A	G	G	G	A	G	G	A	C	T	T	G	A	A	A	G	A	G	C	C	A	C
926	Delta	>138326|29663|29891	C	A	A	T	C	T	T	T	A	A	T	C	A	G	T	G	T	G	T	A	A	C	A	T	T	A	G	G	G	A	G	G	A	C	T	T	G	A	A	A	G	A	G	C	C	A	C
927	Delta	>138322|29626|29854	C	A	A	T	C	T	T	T	A	A	T	C	A	G	T	G	T	G	T	A	A	C	A	T	T	A	G	G	G	A	G	G	A	C	T	T	G	A	A	A	G	A	G	C	C	A	C
928	Delta	>138321|29659|29887	C	A	A	T	C	T	T	T	A	A	T	C	A	G	T	G	T	G	T	A	A	C	A	T	T	A	G	G	G	A	G	G	A	C	T	T	G	A	A	A	G	A	G	C	C	A	C
929	Delta	>138316|29660|29888	C	A	A	T	C	T	T	T	A	A	T	C	A	G	T	G	T	G	T	A	A	C	A	T	T	A	G	G	G	A	G	G	A	C	T	T	G	A	A	A	G	A	G	C	C	A	C
930	Delta	>138313|29659|29887	C	A	A	T	C	T	T	T	A	A	T	C	A	G	T	G	T	G	T	A	A	C	A	T	T	A	G	G	G	A	G	G	A	C	T	T	G	A	A	A	G	A	G	C	C	A	C
931	Delta	>138311|29632|29860	C	A	A	T	C	T	T	T	A	A	T	C	A	G	T	G	T	G	T	A	A	C	A	T	T	A	G	G	G	A	G	G	A	C	T	T	G	A	A	A	G	A	G	C	C	A	C
932	Delta	>138308|29661|29889	C	A	A	T	C	T	T	T	A	A	T	C	A	G	T	G	T	G	T	A	A	C	A	T	T	A	G	G	G	A	G	G	A	C	T	T	G	A	A	A	G	A	G	C	C	A	C
933	Delta	>138183|29662|29890	C	A	A	T	C	T	T	T	A	A	T	C	A	G	T	G	T	G	T	A	A	C	A	T	T	A	G	G	G	A	G	G	A	C	T	T	G	A	A	A	G	A	G	C	C	A	C
934	Delta	>138177|29661|29889	C	A	A	T	C	T	T	T	A	A	T	C	A	G	T	G	T	G	T	A	A	C	A	T	T	A	G	G	G	A	G	G	A	C	T	T	G	A	A	A	G	A	G	C	C	A	C
935	Delta	>138172|29659|29887	C	A	A	T	C	T	T	T	A	A	T	C	A	G	T	G	T	G	T	A	A	C	A	T	T	A	G	G	G	A	G	G	A	C	T	T	G	A	A	A	G	A	G	C	C	A	C
936	Delta	>138139|29661|29889	C	A	A	T	C	T	T	T	A	A	T	C	A	G	T	G	T	G	T	A	A	C	A	T	T	A	G	G	G	A	G	G	A	C	T	T	G	A	A	A	G	A	G	C	C	A	C
937	Delta	>137966|29661|29889	C	A	A	T	C	T	T	T	A	A	T	C	A	G	T	G	T	G	T	A	A	C	A	T	T	A	G	G	G	A	G	G	A	C	T	T	G	A	A	A	G	A	G	C	C	A	C
938	Delta	>137953|29652|29880	C	A	A	T	C	T	T	T	A	A	T	C	A	G	T	G	T	G	T	A	A	C	A	T	T	A	G	G	G	A	G	G	A	C	T	T	G	A	A	A	G	A	G	C	C	A	C
939	Delta	>137950|29662|29890	C	A	A	T	C	T	T	T	A	A	T	C	A	G	T	G	T	G	T	A	A	C	A	T	T	A	G	G	G	A	G	G	A	C	T	T	G	A	A	A	G	A	G	C	C	A	C
940	Delta	>137899|29662|29890	C	A	A	T	C	T	T	T	A	A	T	C	A	G	T	G	T	G	T	A	A	C	A	T	T	A	G	G	G	A	G	G	A	C	T	T	G	A	A	A	G	A	G	C	C	A	C
941	Delta	>137896|29659|29887	C	A	A	T	C	T	T	T	A	A	T	C	A	G	T	G	T	G	T	A	A	C	A	T	T	A	G	G	G	A	G	G	A	C	T	T	G	A	A	A	G	A	G	C	C	A	C
942	Delta	>137894|29659|29887	C	A	A	T	C	T	T	T	A	A	T	C	A	G	T	G	T	G	T	A	A	C	A	T	T	A	G	G	G	A	G	G	A	C	T	T	G	A	A	A	G	A	G	C	C	A	C
943	Delta	>137893|29662|29890	C	A	A	T	C	T	T	T	A	A	T	C	A	G	T	G	T	G	T	A	A	C	A	T	T	A	G	G	G	A	G	G	A	C	T	T	G	A	A	A	G	A	G	C	C	A	C
944	Delta	>137892|29662|29890	C	A	A	T	C	T	T	T	A	A	T	C	A	G	T	G	T	G	T	A	A	C	A	T	T	A	G	G	G	A	G	G	A	C	T	T	G	A	A	A	G	A	G	C	C	A	C
945	Delta	>137891|29662|29890	C	A	A	T	C	T	T	T	A	A	T	C	A	G	T	G	T	G	T	A	A	C	A	T	T	A	G	G	G	A	G	G	A	C	T	T	G	A	A	A	G	A	G	C	C	A	C
946	Delta	>137889|29662|29890	C	A	A	T	C	T	T	T	A	A	T	C	A	G	T	G	T	G	T	A	A	C	A	T	T	A	G	G	G	A	G	G	A	C	T	T	G	A	A	A	G	A	G	C	C	A	C
947	Delta	>137888|29662|29890	C	A	A	T	C	T	T	T	A	A	T	C	A	G	T	G	T	G	T	A	A	C	A	T	T	A	G	G	G	A	G	G	A	C	T	T	G	A	A	A	G	A	G	C	C	A	C
948	Delta	>137887|29650|29878	C	A	A	T	C	T	T	T	A	A	T	C	A	G	T	G	T	G	T	A	A	C	A	T	T	A	G	G	G	A	G	G	A	C	T	T	G	A	A	A	G	A	G	C	C	A	C
949	Delta	>137885|29650|29878	C	A	A	T	C	T	T	T	A	A	T	C	A	G	T	G	T	G	T	A	A	C	A	T	T	A	G	G	G	A	G	G	A	C	T	T	G	A	A	A	G	A	G	C	C	A	C
950	Delta	>137883|29662|29890	C	A	A	T	C	T	T	T	A	A	T	C	A	G	T	G	T	G	T	A	A	C	A	T	T	A	G	G	G	A	G	G	A	C	T	T	G	A	A	A	G	A	G	C	C	A	C
951	Delta	>137877|29662|29890	C	A	A	T	C	T	T	T	A	A	T	C	A	G	T	G	T	G	T	A	A	C	A	T	T	A	G	G	G	A	G	G	A	C	T	T	G	A	A	A	G	A	G	C	C	A	C
952	Delta	>137868|29646|29874	C	A	A	T	C	T	T	T	A	A	T	C	A	G	T	G	T	G	T	A	A	C	A	T	T	A	G	G	G	A	G	G	A	C	T	T	G	A	A	A	G	A	G	C	C	A	C
953	Delta	>137867|29661|29889	C	A	A	T	C	T	T	T	A	A	T	C	A	G	T	G	T	G	T	A	A	C	A	T	T	A	G	G	G	A	G	G	A	C	T	T	G	A	A	A	G	A	G	C	C	A	C
954	Delta	>137515|29662|29890	C	A	A	T	C	T	T	T	A	A	T	C	A	G	T	G	T	G	T	A	A	C	A	T	T	A	G	G	G	A	G	G	A	C	T	T	G	A	A	A	G	A	G	C	C	A	C
955	Delta	>137514|29662|29890	C	A	A	T	C	T	T	T	A	A	T	C	A	G	T	G	T	G	T	A	A	C	A	T	T	A	G	G	G	A	G	G	A	C	T	T	G	A	A	A	G	A	G	C	C	A	C
956	Delta	>137508|29662|29890	C	A	A	T	C	T	T	T	A	A	T	C	A	G	T	G	T	G	T	A	A	C	A	T	T	A	G	G	G	A	G	G	A	C	T	T	G	A	A	A	G	A	G	C	C	A	C
957	Delta	>137503|29646|29874	C	A	A	T	C	T	T	T	A	A	T	C	A	G	T	G	T	G	T	A	A	C	A	T	T	A	G	G	G	A	G	G	A	C	T	T	G	A	A	A	G	A	G	C	C	A	C
958	Delta	>137501|29661|29889	C	A	A	T	C	T	T	T	A	A	T	C	A	G	T	G	T	G	T	A	A	C	A	T	T	A	G	G	G	A	G	G	A	C	T	T	G	A	A	A	G	A	G	C	C	A	C
959	Delta	>137489|29662|29890	C	A	A	T	C	T	T	T	A	A	T	C	A	G	T	G	T	G	T	A	A	C	A	T	T	A	G	G	G	A	G	G	A	C	T	T	G	A	A	A	G	A	G	C	C	A	C
960	Delta	>137487|29662|29890	C	A	A	T	C	T	T	T	A	A	T	C	A	G	T	G	T	G	T	A	A	C	A	T	T	A	G	G	G	A	G	G	A	C	T	T	G	A	A	A	G	A	G	C	C	A	C
961	Delta	>137486|29659|29887	C	A	A	T	C	T	T	T	A	A	T	C	A	G	T	G	T	G	T	A	A	C	A	T	T	A	G	G	G	A	G	G	A	C	T	T	G	A	A	A	G	A	G	C	C	A	C
962	Delta	>137485|29662|29890	C	A	A	T	C	T	T	T	A	A	T	C	A	G	T	G	T	G	T	A	A	C	A	T	T	A	G	G	G	A	G	G	A	C	T	T	G	A	A	A	G	A	G	C	C	A	C
963	Delta	>137484|29662|29890	C	A	A	T	C	T	T	T	A	A	T	C	A	G	T	G	T	G	T	A	A	C	A	T	T	A	G	G	G	A	G	G	A	C	T	T	G	A	A	A	G	A	G	C	C	A	C
964	Delta	>137253|29625|29853	C	A	A	T	C	T	T	T	A	A	T	C	A	G	T	G	T	G	T	A	A	C	A	T	T	A	G	G	G	A	G	G	A	C	T	T	G	A	A	A	G	A	G	C	C	A	C
965	Delta	>137220|29652|29880	C	A	A	T	C	T	T	T	A	A	T	C	A	G	T	G	T	G	T	A	A	C	A	T	T	A	G	G	G	A	G	G	A	C	T	T	G	A	A	A	G	A	G	C	C	A	C
966	Delta	>137219|29661|29889	C	A	A	T	C	T	T	T	A	A	T	C	A	G	T	G	T	G	T	A	A	C	A	T	T	A	G	G	G	A	G	G	A	C	T	T	G	A	A	A	G	A	G	C	C	A	C
967	Delta	>137218|29660|29888	C	A	A	T	C	T	T	T	A	A	T	C	A	G	T	G	T	G	T	A	A	C	A	T	T	A	G	G	G	A	G	G	A	C	T	T	G	A	A	A	G	A	G	C	C	A	C
968	Delta	>137217|29642|29870	C	A	A	T	C	T	T	T	A	A	T	C	A	G	T	G	T	G	T	A	A	C	A	T	T	A	G	G	G	A	G	G	A	C	T	T	G	A	A	A	G	A	G	C	C	A	C
969	Delta	>137212|29653|29881	C	A	A	T	C	T	T	T	A	A	T	C	A	G	T	G	T	G	T	A	A	C	A	T	T	A	G	G	G	A	G	G	A	C	T	T	G	A	A	A	G	A	G	C	C	A	C
970	Delta	>137211|29661|29889	C	A	A	T	C	T	T	T	A	A	T	C	A	G	T	G	T	G	T	A	A	C	A	T	T	A	G	G	G	A	G	G	A	C	T	T	G	A	A	A	G	A	G	C	C	A	C
971	Delta	>137151|29662|29890	C	A	A	T	C	T	T	T	A	A	T	C	A	G	T	G	T	G	T	A	A	C	A	T	T	A	G	G	G	A	G	G	A	C	T	T	G	A	A	A	G	A	G	C	C	A	C
972	Delta	>137146|29651|29879	C	A	A	T	C	T	T	T	A	A	T	C	A	G	T	G	T	G	T	A	A	C	A	T	T	A	G	G	G	A	G	G	A	C	T	T	G	A	A	A	G	A	G	C	C	A	C
973	Delta	>137009|29648|29876	C	A	A	T	C	T	T	T	A	A	T	C	A	G	T	G	T	G	T	A	A	C	A	T	T	A	G	G	G	A	G	G	A	C	T	T	G	A	A	A	G	A	G	C	C	A	C
974	Delta	>136985|29661|29889	C	A	A	T	C	T	T	T	A	A	T	C	A	G	T	G	T	G	T	A	A	C	A	T	T	A	G	G	G	A	G	G	A	C	T	T	G	A	A	A	G	A	G	C	C	A	C
975	Delta	>136909|29662|29890	C	A	A	T	C	T	T	T	A	A	T	C	A	G	T	G	T	G	T	A	A	C	A	T	T	A	G	G	G	A	G	G	A	C	T	T	G	A	A	A	G	A	G	C	C	A	C
976	Delta	>136908|29659|29887	C	A	A	T	C	T	T	T	A	A	T	C	A	G	T	G	T	G	T	A	A	C	A	T	T	A	G	G	G	A	G	G	A	C	T	T	G	A	A	A	G	A	G	C	C	A	C
977	Delta	>136907|29662|29890	C	A	A	T	C	T	T	T	A	A	T	C	A	G	T	G	T	G	T	A	A	C	A	T	T	A	G	G	G	A	G	G	A	C	T	T	G	A	A	A	G	A	G	C	C	A	C
978	Delta	>136902|29662|29890	C	A	A	T	C	T	T	T	A	A	T	C	A	G	T	G	T	G	T	A	A	C	A	T	T	A	G	G	G	A	G	G	A	C	T	T	G	A	A	A	G	A	G	C	C	A	C
979	Delta	>136684|29661|29889	C	A	A	T	C	T	T	T	A	A	T	C	A	G	T	G	T	G	T	A	A	C	A	T	T	A	G	G	G	A	G	G	A	C	T	T	G	A	A	A	G	A	G	C	C	A	C
980	Delta	>135871|29624|29852	C	A	A	T	C	T	T	T	A	A	T	C	A	G	T	G	T	G	T	A	A	C	A	T	T	A	G	G	G	A	G	G	A	C	T	T	G	A	A	A	G	A	G	C	C	A	C
981	Delta	>135869|29661|29889	C	A	A	T	C	T	T	T	A	A	T	C	A	G	T	G	T	G	T	A	A	C	A	T	T	A	G	G	G	A	G	G	A	C	T	T	G	A	A	A	G	A	G	C	C	A	C
982	Delta	>135850|29630|29858	C	A	A	T	C	T	T	T	A	A	T	C	A	G	T	G	T	G	T	A	A	C	A	T	T	A	G	G	G	A	G	G	A	C	T	T	G	A	A	A	G	A	G	C	C	A	C
983	Delta	>135849|29624|29852	C	A	A	T	C	T	T	T	A	A	T	C	A	G	T	G	T	G	T	A	A	C	A	T	T	A	G	G	G	A	G	G	A	C	T	T	G	A	A	A	G	A	G	C	C	A	C
984	Delta	>135846|29624|29852	C	A	A	T	C	T	T	T	A	A	T	C	A	G	T	G	T	G	T	A	A	C	A	T	T	A	G	G	G	A	G	G	A	C	T	T	G	A	A	A	G	A	G	C	C	A	C
985	Delta	>135843|29645|29873	C	A	A	T	C	T	T	T	A	A	T	C	A	G	T	G	T	G	T	A	A	C	A	T	T	A	G	G	G	A	G	G	A	C	T	T	G	A	A	A	G	A	G	C	C	A	C
986	Delta	>135775|29625|29853	C	A	A	T	C	T	T	T	A	A	T	C	A	G	T	G	T	G	T	A	A	C	A	T	T	A	G	G	G	A	G	G	A	C	T	T	G	A	A	A	G	A	G	C	C	A	C
987	Delta	>135751|29652|29880	C	A	A	T	C	T	T	T	A	A	T	C	A	G	T	G	T	G	T	A	A	C	A	T	T	A	G	G	G	A	G	G	A	C	T	T	G	A	A	A	G	A	G	C	C	A	C
988	Delta	>135637|29650|29878	C	A	A	T	C	T	T	T	A	A	T	C	A	G	T	G	T	G	T	A	A	C	A	T	T	A	G	G	G	A	G	G	A	C	T	T	G	A	A	A	G	A	G	C	C	A	C
989	Delta	>135628|29656|29884	C	A	A	T	C	T	T	T	A	A	T	C	A	G	T	G	T	G	T	A	A	C	A	T	T	A	G	G	G	A	G	G	A	C	T	T	G	A	A	A	G	A	G	C	C	A	C
990	Delta	>135627|29624|29852	C	A	A	T	C	T	T	T	A	A	T	C	A	G	T	G	T	G	T	A	A	C	A	T	T	A	G	G	G	A	G	G	A	C	T	T	G	A	A	A	G	A	G	C	C	A	C
991	Delta	>135622|29657|29885	C	A	A	T	C	T	T	T	A	A	T	C	A	G	T	G	T	G	T	A	A	C	A	T	T	A	G	G	G	A	G	G	A	C	T	T	G	A	A	A	G	A	G	C	C	A	C
992	Delta	>135619|29624|29852	C	A	A	T	C	T	T	T	A	A	T	C	A	G	T	G	T	G	T	A	A	C	A	T	T	A	G	G	G	A	G	G	A	C	T	T	G	A	A	A	G	A	G	C	C	A	C
993	Delta	>135613|29625|29853	C	A	A	T	C	T	T	T	A	A	T	C	A	G	T	G	T	G	T	A	A	C	A	T	T	A	G	G	G	A	G	G	A	C	T	T	G	A	A	A	G	A	G	C	C	A	C
994	Delta	>135612|29624|29852	C	A	A	T	C	T	T	T	A	A	T	C	A	G	T	G	T	G	T	A	A	C	A	T	T	A	G	G	G	A	G	G	A	C	T	T	G	A	A	A	G	A	G	C	C	A	C
995	Delta	>135609|29624|29852	C	A	A	T	C	T	T	T	A	A	T	C	A	G	T	G	T	G	T	A	A	C	A	T	T	A	G	G	G	A	G	G	A	C	T	T	G	A	A	A	G	A	G	C	C	A	C
996	Delta	>135608|29624|29852	C	A	A	T	C	T	T	T	A	A	T	C	A	G	T	G	T	G	T	A	A	C	A	T	T	A	G	G	G	A	G	G	A	C	T	T	G	A	A	A	G	A	G	C	C	A	C
997	Delta	>135606|29655|29883	C	A	A	T	C	T	T	T	A	A	T	C	A	G	T	G	T	G	T	A	A	C	A	T	T	A	G	G	G	A	G	G	A	C	T	T	G	A	A	A	G	A	G	C	C	A	C
998	Delta	>135602|29646|29874	C	A	A	T	C	T	T	T	A	A	T	C	A	G	T	G	T	G	T	A	A	C	A	T	T	A	G	G	G	A	G	G	A	C	T	T	G	A	A	A	G	A	G	C	C	A	C
999	Delta	>135598|29624|29852	C	A	A	T	C	T	T	T	A	A	T	C	A	G	T	G	T	G	T	A	A	C	A	T	T	A	G	G	G	A	G	G	A	C	T	T	G	A	A	A	G	A	G	C	C	A	C
1000	Delta	>135595|29624|29852	C	A	A	T	C	T	T	T	A	A	T	C	A	G	T	G	T	G	T	A	A	C	A	T	T	A	G	G	G	A	G	G	A	C	T	T	G	A	A	A	G	A	G	C	C	A	C
1001	Delta	>135594|29634|29862	C	A	A	T	C	T	T	T	A	A	T	C	A	G	T	G	T	G	T	A	A	C	A	T	T	A	G	G	G	A	G	G	A	C	T	T	G	A	A	A	G	A	G	C	C	A	C
1002	Delta	>135592|29624|29852	C	A	A	T	C	T	T	T	A	A	T	C	A	G	T	G	T	G	T	A	A	C	A	T	T	A	G	G	G	A	G	G	A	C	T	T	G	A	A	A	G	A	G	C	C	A	C
1003	Delta	>135588|29624|29852	C	A	A	T	C	T	T	T	A	A	T	C	A	G	T	G	T	G	T	A	A	C	A	T	T	A	G	G	G	A	G	G	A	C	T	T	G	A	A	A	G	A	G	C	C	A	C
1004	Delta	>135587|29629|29857	C	A	A	T	C	T	T	T	A	A	T	C	A	G	T	G	T	G	T	A	A	C	A	T	T	A	G	G	G	A	G	G	A	C	T	T	G	A	A	A	G	A	G	C	C	A	C
1005	Delta	>135584|29631|29859	C	A	A	T	C	T	T	T	A	A	T	C	A	G	T	G	T	G	T	A	A	C	A	T	T	A	G	G	G	A	G	G	A	C	T	T	G	A	A	A	G	A	G	C	C	A	C
1006	Delta	>135575|29624|29852	C	A	A	T	C	T	T	T	A	A	T	C	A	G	T	G	T	G	T	A	A	C	A	T	T	A	G	G	G	A	G	G	A	C	T	T	G	A	A	A	G	A	G	C	C	A	C
1007	Delta	>135522|29661|29889	C	A	A	T	C	T	T	T	A	A	T	C	A	G	T	G	T	G	T	A	A	C	A	T	T	A	G	G	G	A	G	G	A	C	T	T	G	A	A	A	G	A	G	C	C	A	C
1008	Delta	>135486|29661|29889	C	A	A	T	C	T	T	T	A	A	T	C	A	G	T	G	T	G	T	A	A	C	A	T	T	A	G	G	G	A	G	G	A	C	T	T	G	A	A	A	G	A	G	C	C	A	C
1009	Delta	>135440|29647|29875	C	A	A	T	C	T	T	T	A	A	T	C	A	G	T	G	T	G	T	A	A	C	A	T	T	A	G	G	G	A	G	G	A	C	T	T	G	A	A	A	G	A	G	C	C	A	C
1010	Delta	>135437|29660|29888	C	A	A	T	C	T	T	T	A	A	T	C	A	G	T	G	T	G	T	A	A	C	A	T	T	A	G	G	G	A	G	G	A	C	T	T	G	A	A	A	G	A	G	C	C	A	C
1011	Delta	>135429|29657|29885	C	A	A	T	C	T	T	T	A	A	T	C	A	G	T	G	T	G	T	A	A	C	A	T	T	A	G	G	G	A	G	G	A	C	T	T	G	A	A	A	G	A	G	C	C	A	C
1012	Delta	>135248|29653|29881	C	A	A	T	C	T	T	T	A	A	T	C	A	G	T	G	T	G	T	A	A	C	A	T	T	A	G	G	G	A	G	G	A	C	T	T	G	A	A	A	G	A	G	C	C	A	C
1013	Delta	>135196|29632|29860	C	A	A	T	C	T	T	T	A	A	T	C	A	G	T	G	T	G	T	A	A	C	A	T	T	A	G	G	G	A	G	G	A	C	T	T	G	A	A	A	G	A	G	C	C	A	C
1014	Delta	>135195|29661|29889	C	A	A	T	C	T	T	T	A	A	T	C	A	G	T	G	T	G	T	A	A	C	A	T	T	A	G	G	G	A	G	G	A	C	T	T	G	A	A	A	G	A	G	C	C	A	C
1015	Delta	>135194|29660|29888	C	A	A	T	C	T	T	T	A	A	T	C	A	G	T	G	T	G	T	A	A	C	A	T	T	A	G	G	G	A	G	G	A	C	T	T	G	A	A	A	G	A	G	C	C	A	C
1016	Delta	>135166|29661|29889	C	A	A	T	C	T	T	T	A	A	T	C	A	G	T	G	T	G	T	A	A	C	A	T	T	A	G	G	G	A	G	G	A	C	T	T	G	A	A	A	G	A	G	C	C	A	C
1017	Delta	>135162|29632|29860	C	A	A	T	C	T	T	T	A	A	T	C	A	G	T	G	T	G	T	A	A	C	A	T	T	A	G	G	G	A	G	G	A	C	T	T	G	A	A	A	G	A	G	C	C	A	C
1018	Delta	>135051|29650|29878	C	A	A	T	C	T	T	T	A	A	T	C	A	G	T	G	T	G	T	A	A	C	A	T	T	A	G	G	G	A	G	G	A	C	T	T	G	A	A	A	G	A	G	C	C	A	C
1019	Delta	>135049|29653|29881	C	A	A	T	C	T	T	T	A	A	T	C	A	G	T	G	T	G	T	A	A	C	A	T	T	A	G	G	G	A	G	G	A	C	T	T	G	A	A	A	G	A	G	C	C	A	C
1020	Delta	>134984|29626|29854	C	A	A	T	C	T	T	T	A	A	T	C	A	G	T	G	T	G	T	A	A	C	A	T	T	A	G	G	G	A	G	G	A	C	T	T	G	A	A	A	G	A	G	C	C	A	C
1021	Delta	>134974|29646|29874	C	A	A	T	C	T	T	T	A	A	T	C	A	G	T	G	T	G	T	A	A	C	A	T	T	A	G	G	G	A	G	G	A	C	T	T	G	A	A	A	G	A	G	C	C	A	C
1022	Delta	>134973|29625|29853	C	A	A	T	C	T	T	T	A	A	T	C	A	G	T	G	T	G	T	A	A	C	A	T	T	A	G	G	G	A	G	G	A	C	T	T	G	A	A	A	G	A	G	C	C	A	C
1023	Delta	>134972|29624|29852	C	A	A	T	C	T	T	T	A	A	T	C	A	G	T	G	T	G	T	A	A	C	A	T	T	A	G	G	G	A	G	G	A	C	T	T	G	A	A	A	G	A	G	C	C	A	C
1024	Delta	>134967|29624|29852	C	A	A	T	C	T	T	T	A	A	T	C	A	G	T	G	T	G	T	A	A	C	A	T	T	A	G	G	G	A	G	G	A	C	T	T	G	A	A	A	G	A	G	C	C	A	C
1025	Delta	>134966|29650|29878	C	A	A	T	C	T	T	T	A	A	T	C	A	G	T	G	T	G	T	A	A	C	A	T	T	A	G	G	G	A	G	G	A	C	T	T	G	A	A	A	G	A	G	C	C	A	C
1026	Delta	>134965|29652|29880	C	A	A	T	C	T	T	T	A	A	T	C	A	G	T	G	T	G	T	A	A	C	A	T	T	A	G	G	G	A	G	G	A	C	T	T	G	A	A	A	G	A	G	C	C	A	C
1027	Delta	>134961|29624|29852	C	A	A	T	C	T	T	T	A	A	T	C	A	G	T	G	T	G	T	A	A	C	A	T	T	A	G	G	G	A	G	G	A	C	T	T	G	A	A	A	G	A	G	C	C	A	C
1028	Delta	>134960|29624|29852	C	A	A	T	C	T	T	T	A	A	T	C	A	G	T	G	T	G	T	A	A	C	A	T	T	A	G	G	G	A	G	G	A	C	T	T	G	A	A	A	G	A	G	C	C	A	C
1029	Delta	>134959|29625|29853	C	A	A	T	C	T	T	T	A	A	T	C	A	G	T	G	T	G	T	A	A	C	A	T	T	A	G	G	G	A	G	G	A	C	T	T	G	A	A	A	G	A	G	C	C	A	C
1030	Delta	>134958|29625|29853	C	A	A	T	C	T	T	T	A	A	T	C	A	G	T	G	T	G	T	A	A	C	A	T	T	A	G	G	G	A	G	G	A	C	T	T	G	A	A	A	G	A	G	C	C	A	C
1031	Delta	>134957|29658|29886	C	A	A	T	C	T	T	T	A	A	T	C	A	G	T	G	T	G	T	A	A	C	A	T	T	A	G	G	G	A	G	G	A	C	T	T	G	A	A	A	G	A	G	C	C	A	C
1032	Delta	>134955|29625|29853	C	A	A	T	C	T	T	T	A	A	T	C	A	G	T	G	T	G	T	A	A	C	A	T	T	A	G	G	G	A	G	G	A	C	T	T	G	A	A	A	G	A	G	C	C	A	C
1033	Delta	>134952|29624|29852	C	A	A	T	C	T	T	T	A	A	T	C	A	G	T	G	T	G	T	A	A	C	A	T	T	A	G	G	G	A	G	G	A	C	T	T	G	A	A	A	G	A	G	C	C	A	C
1034	Delta	>134950|29651|29879	C	A	A	T	C	T	T	T	A	A	T	C	A	G	T	G	T	G	T	A	A	C	A	T	T	A	G	G	G	A	G	G	A	C	T	T	G	A	A	A	G	A	G	C	C	A	C
1035	Delta	>134948|29624|29852	C	A	A	T	C	T	T	T	A	A	T	C	A	G	T	G	T	G	T	A	A	C	A	T	T	A	G	G	G	A	G	G	A	C	T	T	G	A	A	A	G	A	G	C	C	A	C
1036	Delta	>134947|29625|29853	C	A	A	T	C	T	T	T	A	A	T	C	A	G	T	G	T	G	T	A	A	C	A	T	T	A	G	G	G	A	G	G	A	C	T	T	G	A	A	A	G	A	G	C	C	A	C
1037	Delta	>134945|29624|29852	C	A	A	T	C	T	T	T	A	A	T	C	A	G	T	G	T	G	T	A	A	C	A	T	T	A	G	G	G	A	G	G	A	C	T	T	G	A	A	A	G	A	G	C	C	A	C
1038	Delta	>134869|29661|29889	C	A	A	T	C	T	T	T	A	A	T	C	A	G	T	G	T	G	T	A	A	C	A	T	T	A	G	G	G	A	G	G	A	C	T	T	G	A	A	A	G	A	G	C	C	A	C
1039	Delta	>134818|29697|29925	C	A	A	T	C	T	T	T	A	A	T	C	A	G	T	G	T	G	T	A	A	C	A	T	T	A	G	G	G	A	G	G	A	C	T	T	G	A	A	A	G	A	G	C	C	A	C
1040	Delta	>134817|29675|29903	C	A	A	T	C	T	T	T	A	A	T	C	A	G	T	G	T	G	T	A	A	C	A	T	T	A	G	G	G	A	G	G	A	C	T	T	G	A	A	A	G	A	G	C	C	A	C
1041	Delta	>134816|29673|29901	C	A	A	T	C	T	T	T	A	A	T	C	A	G	T	G	T	G	T	A	A	C	A	T	T	A	G	G	G	A	G	G	A	C	T	T	G	A	A	A	G	A	G	C	C	A	C
1042	Delta	>134814|29669|29897	C	A	A	T	C	T	T	T	A	A	T	C	A	G	T	G	T	G	T	A	A	C	A	T	T	A	G	G	G	A	G	G	A	C	T	T	G	A	A	A	G	A	G	C	C	A	C
1043	Delta	>134812|29663|29891	C	A	A	T	C	T	T	T	A	A	T	C	A	G	T	G	T	G	T	A	A	C	A	T	T	A	G	G	G	A	G	G	A	C	T	T	G	A	A	A	G	A	G	C	C	A	C
1044	Delta	>134811|29572|29800	C	A	A	T	C	T	T	T	A	A	T	C	A	G	T	G	T	G	T	A	A	C	A	T	T	A	G	G	G	A	G	G	A	C	T	T	G	A	A	A	G	A	G	C	C	A	C
1045	Delta	>134810|29571|29799	C	A	A	T	C	T	T	T	A	A	T	C	A	G	T	G	T	G	T	A	A	C	A	T	T	A	G	G	G	A	G	G	A	C	T	T	G	A	A	A	G	A	G	C	C	A	C
1046	Delta	>134809|29571|29799	C	A	A	T	C	T	T	T	A	A	T	C	A	G	T	G	T	G	T	A	A	C	A	T	T	A	G	G	G	A	G	G	A	C	T	T	G	A	A	A	G	A	G	C	C	A	C
1047	Delta	>134808|29654|29882	C	A	A	T	C	T	T	T	A	A	T	C	A	G	T	G	T	G	T	A	A	C	A	T	T	A	G	G	G	A	G	G	A	C	T	T	G	A	A	A	G	A	G	C	C	A	C
1048	Delta	>134807|29654|29882	C	A	A	T	C	T	T	T	A	A	T	C	A	G	T	G	T	G	T	A	A	C	A	T	T	A	G	G	G	A	G	G	A	C	T	T	G	A	A	A	G	A	G	C	C	A	C
1049	Delta	>134806|29654|29882	C	A	A	T	C	T	T	T	A	A	T	C	A	G	T	G	T	G	T	A	A	C	A	T	T	A	G	G	G	A	G	G	A	C	T	T	G	A	A	A	G	A	G	C	C	A	C
1050	Delta	>134805|29654|29882	C	A	A	T	C	T	T	T	A	A	T	C	A	G	T	G	T	G	T	A	A	C	A	T	T	A	G	G	G	A	G	G	A	C	T	T	G	A	A	A	G	A	G	C	C	A	C
1051	Delta	>134804|29654|29882	C	A	A	T	C	T	T	T	A	A	T	C	A	G	T	G	T	G	T	A	A	C	A	T	T	A	G	G	G	A	G	G	A	C	T	T	G	A	A	A	G	A	G	C	C	A	C
1052	Delta	>134802|29607|29835	C	A	A	T	C	T	T	T	A	A	T	C	A	G	T	G	T	G	T	A	A	C	A	T	T	A	G	G	G	A	G	G	A	C	T	T	G	A	A	A	G	A	G	C	C	A	C
1053	Delta	>134801|29657|29885	C	A	A	T	C	T	T	T	A	A	T	C	A	G	T	G	T	G	T	A	A	C	A	T	T	A	G	G	G	A	G	G	A	C	T	T	G	A	A	A	G	A	G	C	C	A	C
1054	Delta	>134799|29529|29757	C	A	A	T	C	T	T	T	A	A	T	C	A	G	T	G	T	G	T	A	A	C	A	T	T	A	G	G	G	A	G	G	A	C	T	T	G	A	A	A	G	A	G	C	C	A	C
1055	Delta	>134798|29661|29889	C	A	A	T	C	T	T	T	A	A	T	C	A	G	T	G	T	G	T	A	A	C	A	T	T	A	G	G	G	A	G	G	A	C	T	T	G	A	A	A	G	A	G	C	C	A	C
1056	Delta	>134797|29669|29897	C	A	A	T	C	T	T	T	A	A	T	C	A	G	T	G	T	G	T	A	A	C	A	T	T	A	G	G	G	A	G	G	A	C	T	T	G	A	A	A	G	A	G	C	C	A	C
1057	Delta	>134796|29668|29896	C	A	A	T	C	T	T	T	A	A	T	C	A	G	T	G	T	G	T	A	A	C	A	T	T	A	G	G	G	A	G	G	A	C	T	T	G	A	A	A	G	A	G	C	C	A	C
1058	Delta	>134795|29682|29910	C	A	A	T	C	T	T	T	A	A	T	C	A	G	T	G	T	G	T	A	A	C	A	T	T	A	G	G	G	A	G	G	A	C	T	T	G	A	A	A	G	A	G	C	C	A	C
1059	Delta	>134794|29571|29799	C	A	A	T	C	T	T	T	A	A	T	C	A	G	T	G	T	G	T	A	A	C	A	T	T	A	G	G	G	A	G	G	A	C	T	T	G	A	A	A	G	A	G	C	C	A	C
1060	Delta	>134793|29654|29882	C	A	A	T	C	T	T	T	A	A	T	C	A	G	T	G	T	G	T	A	A	C	A	T	T	A	G	G	G	A	G	G	A	C	T	T	G	A	A	A	G	A	G	C	C	A	C
1061	Delta	>134791|29654|29882	C	A	A	T	C	T	T	T	A	A	T	C	A	G	T	G	T	G	T	A	A	C	A	T	T	A	G	G	G	A	G	G	A	C	T	T	G	A	A	A	G	A	G	C	C	A	C
1062	Delta	>134790|29654|29882	C	A	A	T	C	T	T	T	A	A	T	C	A	G	T	G	T	G	T	A	A	C	A	T	T	A	G	G	G	A	G	G	A	C	T	T	G	A	A	A	G	A	G	C	C	A	C
1063	Delta	>134789|29610|29838	C	A	A	T	C	T	T	T	A	A	T	C	A	G	T	G	T	G	T	A	A	C	A	T	T	A	G	G	G	A	G	G	A	C	T	T	G	A	A	A	G	A	G	C	C	A	C
1064	Delta	>134788|29610|29838	C	A	A	T	C	T	T	T	A	A	T	C	A	G	T	G	T	G	T	A	A	C	A	T	T	A	G	G	G	A	G	G	A	C	T	T	G	A	A	A	G	A	G	C	C	A	C
1065	Delta	>134787|29610|29838	C	A	A	T	C	T	T	T	A	A	T	C	A	G	T	G	T	G	T	A	A	C	A	T	T	A	G	G	G	A	G	G	A	C	T	T	G	A	A	A	G	A	G	C	C	A	C
1066	Delta	>134786|29658|29886	C	A	A	T	C	T	T	T	A	A	T	C	A	G	T	G	T	G	T	A	A	C	A	T	T	A	G	G	G	A	G	G	A	C	T	T	G	A	A	A	G	A	G	C	C	A	C
1067	Delta	>134785|29639|29867	C	A	A	T	C	T	T	T	A	A	T	C	A	G	T	G	T	G	T	A	A	C	A	T	T	A	G	G	G	A	G	G	A	C	T	T	G	A	A	A	G	A	G	C	C	A	C
1068	Delta	>134784|29639|29867	C	A	A	T	C	T	T	T	A	A	T	C	A	G	T	G	T	G	T	A	A	C	A	T	T	A	G	G	G	A	G	G	A	C	T	T	G	A	A	A	G	A	G	C	C	A	C
1069	Delta	>134783|29639|29867	C	A	A	T	C	T	T	T	A	A	T	C	A	G	T	G	T	G	T	A	A	C	A	T	T	A	G	G	G	A	G	G	A	C	T	T	G	A	A	A	G	A	G	C	C	A	C
1070	Delta	>134782|29662|29890	C	A	A	T	C	T	T	T	A	A	T	C	A	G	T	G	T	G	T	A	A	C	A	T	T	A	G	G	G	A	G	G	A	C	T	T	G	A	A	A	G	A	G	C	C	A	C
1071	Delta	>134781|29662|29890	C	A	A	T	C	T	T	T	A	A	T	C	A	G	T	G	T	G	T	A	A	C	A	T	T	A	G	G	G	A	G	G	A	C	T	T	G	A	A	A	G	A	G	C	C	A	C
1072	Delta	>134780|29662|29890	C	A	A	T	C	T	T	T	A	A	T	C	A	G	T	G	T	G	T	A	A	C	A	T	T	A	G	G	G	A	G	G	A	C	T	T	G	A	A	A	G	A	G	C	C	A	C
1073	Delta	>134779|29662|29890	C	A	A	T	C	T	T	T	A	A	T	C	A	G	T	G	T	G	T	A	A	C	A	T	T	A	G	G	G	A	G	G	A	C	T	T	G	A	A	A	G	A	G	C	C	A	C
1074	Delta	>134778|29662|29890	C	A	A	T	C	T	T	T	A	A	T	C	A	G	T	G	T	G	T	A	A	C	A	T	T	A	G	G	G	A	G	G	A	C	T	T	G	A	A	A	G	A	G	C	C	A	C
1075	Delta	>134777|29662|29890	C	A	A	T	C	T	T	T	A	A	T	C	A	G	T	G	T	G	T	A	A	C	A	T	T	A	G	G	G	A	G	G	A	C	T	T	G	A	A	A	G	A	G	C	C	A	C
1076	Delta	>134776|29662|29890	C	A	A	T	C	T	T	T	A	A	T	C	A	G	T	G	T	G	T	A	A	C	A	T	T	A	G	G	G	A	G	G	A	C	T	T	G	A	A	A	G	A	G	C	C	A	C
1077	Delta	>134772|29662|29890	C	A	A	T	C	T	T	T	A	A	T	C	A	G	T	G	T	G	T	A	A	C	A	T	T	A	G	G	G	A	G	G	A	C	T	T	G	A	A	A	G	A	G	C	C	A	C
1078	Delta	>134771|29662|29890	C	A	A	T	C	T	T	T	A	A	T	C	A	G	T	G	T	G	T	A	A	C	A	T	T	A	G	G	G	A	G	G	A	C	T	T	G	A	A	A	G	A	G	C	C	A	C
1079	Delta	>134770|29668|29896	C	A	A	T	C	T	T	T	A	A	T	C	A	G	T	G	T	G	T	A	A	C	A	T	T	A	G	G	G	A	G	G	A	C	T	T	G	A	A	A	G	A	G	C	C	A	C
1080	Delta	>134767|29662|29890	C	A	A	T	C	T	T	T	A	A	T	C	A	G	T	G	T	G	T	A	A	C	A	T	T	A	G	G	G	A	G	G	A	C	T	T	G	A	A	A	G	A	G	C	C	A	C
1081	Delta	>134765|29662|29890	C	A	A	T	C	T	T	T	A	A	T	C	A	G	T	G	T	G	T	A	A	C	A	T	T	A	G	G	G	A	G	G	A	C	T	T	G	A	A	A	G	A	G	C	C	A	C
1082	Delta	>134764|29662|29890	C	A	A	T	C	T	T	T	A	A	T	C	A	G	T	G	T	G	T	A	A	C	A	T	T	A	G	G	G	A	G	G	A	C	T	T	G	A	A	A	G	A	G	C	C	A	C
1083	Delta	>134763|29662|29890	C	A	A	T	C	T	T	T	A	A	T	C	A	G	T	G	T	G	T	A	A	C	A	T	T	A	G	G	G	A	G	G	A	C	T	T	G	A	A	A	G	A	G	C	C	A	C
1084	Delta	>134761|29662|29890	C	A	A	T	C	T	T	T	A	A	T	C	A	G	T	G	T	G	T	A	A	C	A	T	T	A	G	G	G	A	G	G	A	C	T	T	G	A	A	A	G	A	G	C	C	A	C
1085	Delta	>134760|29675|29903	C	A	A	T	C	T	T	T	A	A	T	C	A	G	T	G	T	G	T	A	A	C	A	T	T	A	G	G	G	A	G	G	A	C	T	T	G	A	A	A	G	A	G	C	C	A	C
1086	Delta	>134759|29662|29890	C	A	A	T	C	T	T	T	A	A	T	C	A	G	T	G	T	G	T	A	A	C	A	T	T	A	G	G	G	A	G	G	A	C	T	T	G	A	A	A	G	A	G	C	C	A	C
1087	Delta	>134758|29662|29890	C	A	A	T	C	T	T	T	A	A	T	C	A	G	T	G	T	G	T	A	A	C	A	T	T	A	G	G	G	A	G	G	A	C	T	T	G	A	A	A	G	A	G	C	C	A	C
1088	Delta	>134757|29662|29890	C	A	A	T	C	T	T	T	A	A	T	C	A	G	T	G	T	G	T	A	A	C	A	T	T	A	G	G	G	A	G	G	A	C	T	T	G	A	A	A	G	A	G	C	C	A	C
1089	Delta	>134756|29662|29890	C	A	A	T	C	T	T	T	A	A	T	C	A	G	T	G	T	G	T	A	A	C	A	T	T	A	G	G	G	A	G	G	A	C	T	T	G	A	A	A	G	A	G	C	C	A	C
1090	Delta	>134755|29662|29890	C	A	A	T	C	T	T	T	A	A	T	C	A	G	T	G	T	G	T	A	A	C	A	T	T	A	G	G	G	A	G	G	A	C	T	T	G	A	A	A	G	A	G	C	C	A	C
1091	Delta	>134754|29662|29890	C	A	A	T	C	T	T	T	A	A	T	C	A	G	T	G	T	G	T	A	A	C	A	T	T	A	G	G	G	A	G	G	A	C	T	T	G	A	A	A	G	A	G	C	C	A	C
1092	Delta	>134752|29662|29890	C	A	A	T	C	T	T	T	A	A	T	C	A	G	T	G	T	G	T	A	A	C	A	T	T	A	G	G	G	A	G	G	A	C	T	T	G	A	A	A	G	A	G	C	C	A	C
1093	Delta	>134751|29659|29887	C	A	A	T	C	T	T	T	A	A	T	C	A	G	T	G	T	G	T	A	A	C	A	T	T	A	G	G	G	A	G	G	A	C	T	T	G	A	A	A	G	A	G	C	C	A	C
1094	Delta	>134750|29662|29890	C	A	A	T	C	T	T	T	A	A	T	C	A	G	T	G	T	G	T	A	A	C	A	T	T	A	G	G	G	A	G	G	A	C	T	T	G	A	A	A	G	A	G	C	C	A	C
1095	Delta	>134748|29662|29890	C	A	A	T	C	T	T	T	A	A	T	C	A	G	T	G	T	G	T	A	A	C	A	T	T	A	G	G	G	A	G	G	A	C	T	T	G	A	A	A	G	A	G	C	C	A	C
1096	Delta	>134747|29662|29890	C	A	A	T	C	T	T	T	A	A	T	C	A	G	T	G	T	G	T	A	A	C	A	T	T	A	G	G	G	A	G	G	A	C	T	T	G	A	A	A	G	A	G	C	C	A	C
1097	Delta	>134746|29662|29890	C	A	A	T	C	T	T	T	A	A	T	C	A	G	T	G	T	G	T	A	A	C	A	T	T	A	G	G	G	A	G	G	A	C	T	T	G	A	A	A	G	A	G	C	C	A	C
1098	Delta	>134744|29662|29890	C	A	A	T	C	T	T	T	A	A	T	C	A	G	T	G	T	G	T	A	A	C	A	T	T	A	G	G	G	A	G	G	A	C	T	T	G	A	A	A	G	A	G	C	C	A	C
1099	Delta	>134741|29662|29890	C	A	A	T	C	T	T	T	A	A	T	C	A	G	T	G	T	G	T	A	A	C	A	T	T	A	G	G	G	A	G	G	A	C	T	T	G	A	A	A	G	A	G	C	C	A	C
1100	Delta	>134739|29662|29890	C	A	A	T	C	T	T	T	A	A	T	C	A	G	T	G	T	G	T	A	A	C	A	T	T	A	G	G	G	A	G	G	A	C	T	T	G	A	A	A	G	A	G	C	C	A	C
1101	Delta	>134738|29662|29890	C	A	A	T	C	T	T	T	A	A	T	C	A	G	T	G	T	G	T	A	A	C	A	T	T	A	G	G	G	A	G	G	A	C	T	T	G	A	A	A	G	A	G	C	C	A	C
1102	Delta	>134737|29662|29890	C	A	A	T	C	T	T	T	A	A	T	C	A	G	T	G	T	G	T	A	A	C	A	T	T	A	G	G	G	A	G	G	A	C	T	T	G	A	A	A	G	A	G	C	C	A	C
1103	Delta	>134736|29662|29890	C	A	A	T	C	T	T	T	A	A	T	C	A	G	T	G	T	G	T	A	A	C	A	T	T	A	G	G	G	A	G	G	A	C	T	T	G	A	A	A	G	A	G	C	C	A	C
1104	Delta	>134735|29662|29890	C	A	A	T	C	T	T	T	A	A	T	C	A	G	T	G	T	G	T	A	A	C	A	T	T	A	G	G	G	A	G	G	A	C	T	T	G	A	A	A	G	A	G	C	C	A	C
1105	Delta	>134733|29675|29903	C	A	A	T	C	T	T	T	A	A	T	C	A	G	T	G	T	G	T	A	A	C	A	T	T	A	G	G	G	A	G	G	A	C	T	T	G	A	A	A	G	A	G	C	C	A	C
1106	Delta	>134732|29662|29890	C	A	A	T	C	T	T	T	A	A	T	C	A	G	T	G	T	G	T	A	A	C	A	T	T	A	G	G	G	A	G	G	A	C	T	T	G	A	A	A	G	A	G	C	C	A	C
1107	Delta	>134731|29662|29890	C	A	A	T	C	T	T	T	A	A	T	C	A	G	T	G	T	G	T	A	A	C	A	T	T	A	G	G	G	A	G	G	A	C	T	T	G	A	A	A	G	A	G	C	C	A	C
1108	Delta	>134728|29665|29893	C	A	A	T	C	T	T	T	A	A	T	C	A	G	T	G	T	G	T	A	A	C	A	T	T	A	G	G	G	A	G	G	A	C	T	T	G	A	A	A	G	A	G	C	C	A	C
1109	Delta	>134725|29662|29890	C	A	A	T	C	T	T	T	A	A	T	C	A	G	T	G	T	G	T	A	A	C	A	T	T	A	G	G	G	A	G	G	A	C	T	T	G	A	A	A	G	A	G	C	C	A	C
1110	Delta	>134724|29662|29890	C	A	A	T	C	T	T	T	A	A	T	C	A	G	T	G	T	G	T	A	A	C	A	T	T	A	G	G	G	A	G	G	A	C	T	T	G	A	A	A	G	A	G	C	C	A	C
1111	Delta	>134723|29662|29890	C	A	A	T	C	T	T	T	A	A	T	C	A	G	T	G	T	G	T	A	A	C	A	T	T	A	G	G	G	A	G	G	A	C	T	T	G	A	A	A	G	A	G	C	C	A	C
1112	Delta	>134721|29662|29890	C	A	A	T	C	T	T	T	A	A	T	C	A	G	T	G	T	G	T	A	A	C	A	T	T	A	G	G	G	A	G	G	A	C	T	T	G	A	A	A	G	A	G	C	C	A	C
1113	Delta	>134719|29653|29881	C	A	A	T	C	T	T	T	A	A	T	C	A	G	T	G	T	G	T	A	A	C	A	T	T	A	G	G	G	A	G	G	A	C	T	T	G	A	A	A	G	A	G	C	C	A	C
1114	Delta	>134718|29662|29890	C	A	A	T	C	T	T	T	A	A	T	C	A	G	T	G	T	G	T	A	A	C	A	T	T	A	G	G	G	A	G	G	A	C	T	T	G	A	A	A	G	A	G	C	C	A	C
1115	Delta	>134717|29662|29890	C	A	A	T	C	T	T	T	A	A	T	C	A	G	T	G	T	G	T	A	A	C	A	T	T	A	G	G	G	A	G	G	A	C	T	T	G	A	A	A	G	A	G	C	C	A	C
1116	Delta	>134714|29662|29890	C	A	A	T	C	T	T	T	A	A	T	C	A	G	T	G	T	G	T	A	A	C	A	T	T	A	G	G	G	A	G	G	A	C	T	T	G	A	A	A	G	A	G	C	C	A	C
1117	Delta	>134713|29662|29890	C	A	A	T	C	T	T	T	A	A	T	C	A	G	T	G	T	G	T	A	A	C	A	T	T	A	G	G	G	A	G	G	A	C	T	T	G	A	A	A	G	A	G	C	C	A	C
1118	Delta	>134712|29653|29881	C	A	A	T	C	T	T	T	A	A	T	C	A	G	T	G	T	G	T	A	A	C	A	T	T	A	G	G	G	A	G	G	A	C	T	T	G	A	A	A	G	A	G	C	C	A	C
1119	Delta	>134711|29659|29887	C	A	A	T	C	T	T	T	A	A	T	C	A	G	T	G	T	G	T	A	A	C	A	T	T	A	G	G	G	A	G	G	A	C	T	T	G	A	A	A	G	A	G	C	C	A	C
1120	Delta	>134710|29662|29890	C	A	A	T	C	T	T	T	A	A	T	C	A	G	T	G	T	G	T	A	A	C	A	T	T	A	G	G	G	A	G	G	A	C	T	T	G	A	A	A	G	A	G	C	C	A	C
1121	Delta	>134707|29662|29890	C	A	A	T	C	T	T	T	A	A	T	C	A	G	T	G	T	G	T	A	A	C	A	T	T	A	G	G	G	A	G	G	A	C	T	T	G	A	A	A	G	A	G	C	C	A	C
1122	Delta	>134706|29662|29890	C	A	A	T	C	T	T	T	A	A	T	C	A	G	T	G	T	G	T	A	A	C	A	T	T	A	G	G	G	A	G	G	A	C	T	T	G	A	A	A	G	A	G	C	C	A	C
1123	Delta	>134705|29676|29904	C	A	A	T	C	T	T	T	A	A	T	C	A	G	T	G	T	G	T	A	A	C	A	T	T	A	G	G	G	A	G	G	A	C	T	T	G	A	A	A	G	A	G	C	C	A	C
1124	Delta	>134704|29662|29890	C	A	A	T	C	T	T	T	A	A	T	C	A	G	T	G	T	G	T	A	A	C	A	T	T	A	G	G	G	A	G	G	A	C	T	T	G	A	A	A	G	A	G	C	C	A	C
1125	Delta	>134703|29662|29890	C	A	A	T	C	T	T	T	A	A	T	C	A	G	T	G	T	G	T	A	A	C	A	T	T	A	G	G	G	A	G	G	A	C	T	T	G	A	A	A	G	A	G	C	C	A	C
1126	Delta	>134699|29662|29890	C	A	A	T	C	T	T	T	A	A	T	C	A	G	T	G	T	G	T	A	A	C	A	T	T	A	G	G	G	A	G	G	A	C	T	T	G	A	A	A	G	A	G	C	C	A	C
1127	Delta	>134698|29662|29890	C	A	A	T	C	T	T	T	A	A	T	C	A	G	T	G	T	G	T	A	A	C	A	T	T	A	G	G	G	A	G	G	A	C	T	T	G	A	A	A	G	A	G	C	C	A	C
1128	Delta	>134696|29662|29890	C	A	A	T	C	T	T	T	A	A	T	C	A	G	T	G	T	G	T	A	A	C	A	T	T	A	G	G	G	A	G	G	A	C	T	T	G	A	A	A	G	A	G	C	C	A	C
1129	Delta	>134695|29662|29890	C	A	A	T	C	T	T	T	A	A	T	C	A	G	T	G	T	G	T	A	A	C	A	T	T	A	G	G	G	A	G	G	A	C	T	T	G	A	A	A	G	A	G	C	C	A	C
1130	Delta	>134694|29662|29890	C	A	A	T	C	T	T	T	A	A	T	C	A	G	T	G	T	G	T	A	A	C	A	T	T	A	G	G	G	A	G	G	A	C	T	T	G	A	A	A	G	A	G	C	C	A	C
1131	Delta	>134693|29662|29890	C	A	A	T	C	T	T	T	A	A	T	C	A	G	T	G	T	G	T	A	A	C	A	T	T	A	G	G	G	A	G	G	A	C	T	T	G	A	A	A	G	A	G	C	C	A	C
1132	Delta	>134692|29662|29890	C	A	A	T	C	T	T	T	A	A	T	C	A	G	T	G	T	G	T	A	A	C	A	T	T	A	G	G	G	A	G	G	A	C	T	T	G	A	A	A	G	A	G	C	C	A	C
1133	Delta	>134691|29662|29890	C	A	A	T	C	T	T	T	A	A	T	C	A	G	T	G	T	G	T	A	A	C	A	T	T	A	G	G	G	A	G	G	A	C	T	T	G	A	A	A	G	A	G	C	C	A	C
1134	Delta	>134690|29662|29890	C	A	A	T	C	T	T	T	A	A	T	C	A	G	T	G	T	G	T	A	A	C	A	T	T	A	G	G	G	A	G	G	A	C	T	T	G	A	A	A	G	A	G	C	C	A	C
1135	Delta	>134689|29662|29890	C	A	A	T	C	T	T	T	A	A	T	C	A	G	T	G	T	G	T	A	A	C	A	T	T	A	G	G	G	A	G	G	A	C	T	T	G	A	A	A	G	A	G	C	C	A	C
1136	Delta	>134688|29662|29890	C	A	A	T	C	T	T	T	A	A	T	C	A	G	T	G	T	G	T	A	A	C	A	T	T	A	G	G	G	A	G	G	A	C	T	T	G	A	A	A	G	A	G	C	C	A	C
1137	Delta	>134687|29668|29896	C	A	A	T	C	T	T	T	A	A	T	C	A	G	T	G	T	G	T	A	A	C	A	T	T	A	G	G	G	A	G	G	A	C	T	T	G	A	A	A	G	A	G	C	C	A	C
1138	Delta	>134686|29653|29881	C	A	A	T	C	T	T	T	A	A	T	C	A	G	T	G	T	G	T	A	A	C	A	T	T	A	G	G	G	A	G	G	A	C	T	T	G	A	A	A	G	A	G	C	C	A	C
1139	Delta	>134685|29653|29881	C	A	A	T	C	T	T	T	A	A	T	C	A	G	T	G	T	G	T	A	A	C	A	T	T	A	G	G	G	A	G	G	A	C	T	T	G	A	A	A	G	A	G	C	C	A	C
1140	Delta	>134684|29662|29890	C	A	A	T	C	T	T	T	A	A	T	C	A	G	T	G	T	G	T	A	A	C	A	T	T	A	G	G	G	A	G	G	A	C	T	T	G	A	A	A	G	A	G	C	C	A	C
1141	Delta	>134683|29662|29890	C	A	A	T	C	T	T	T	A	A	T	C	A	G	T	G	T	G	T	A	A	C	A	T	T	A	G	G	G	A	G	G	A	C	T	T	G	A	A	A	G	A	G	C	C	A	C
1142	Delta	>134680|29662|29890	C	A	A	T	C	T	T	T	A	A	T	C	A	G	T	G	T	G	T	A	A	C	A	T	T	A	G	G	G	A	G	G	A	C	T	T	G	A	A	A	G	A	G	C	C	A	C
1143	Delta	>134679|29662|29890	C	A	A	T	C	T	T	T	A	A	T	C	A	G	T	G	T	G	T	A	A	C	A	T	T	A	G	G	G	A	G	G	A	C	T	T	G	A	A	A	G	A	G	C	C	A	C
1144	Delta	>134678|29662|29890	C	A	A	T	C	T	T	T	A	A	T	C	A	G	T	G	T	G	T	A	A	C	A	T	T	A	G	G	G	A	G	G	A	C	T	T	G	A	A	A	G	A	G	C	C	A	C
1145	Delta	>134677|29662|29890	C	A	A	T	C	T	T	T	A	A	T	C	A	G	T	G	T	G	T	A	A	C	A	T	T	A	G	G	G	A	G	G	A	C	T	T	G	A	A	A	G	A	G	C	C	A	C
1146	Delta	>134676|29662|29890	C	A	A	T	C	T	T	T	A	A	T	C	A	G	T	G	T	G	T	A	A	C	A	T	T	A	G	G	G	A	G	G	A	C	T	T	G	A	A	A	G	A	G	C	C	A	C
1147	Delta	>134675|29662|29890	C	A	A	T	C	T	T	T	A	A	T	C	A	G	T	G	T	G	T	A	A	C	A	T	T	A	G	G	G	A	G	G	A	C	T	T	G	A	A	A	G	A	G	C	C	A	C
1148	Delta	>134673|29662|29890	C	A	A	T	C	T	T	T	A	A	T	C	A	G	T	G	T	G	T	A	A	C	A	T	T	A	G	G	G	A	G	G	A	C	T	T	G	A	A	A	G	A	G	C	C	A	C
1149	Delta	>134672|29662|29890	C	A	A	T	C	T	T	T	A	A	T	C	A	G	T	G	T	G	T	A	A	C	A	T	T	A	G	G	G	A	G	G	A	C	T	T	G	A	A	A	G	A	G	C	C	A	C
1150	Delta	>134671|29662|29890	C	A	A	T	C	T	T	T	A	A	T	C	A	G	T	G	T	G	T	A	A	C	A	T	T	A	G	G	G	A	G	G	A	C	T	T	G	A	A	A	G	A	G	C	C	A	C
1151	Delta	>134670|29662|29890	C	A	A	T	C	T	T	T	A	A	T	C	A	G	T	G	T	G	T	A	A	C	A	T	T	A	G	G	G	A	G	G	A	C	T	T	G	A	A	A	G	A	G	C	C	A	C
1152	Delta	>134666|29662|29890	C	A	A	T	C	T	T	T	A	A	T	C	A	G	T	G	T	G	T	A	A	C	A	T	T	A	G	G	G	A	G	G	A	C	T	T	G	A	A	A	G	A	G	C	C	A	C
1153	Delta	>134665|29662|29890	C	A	A	T	C	T	T	T	A	A	T	C	A	G	T	G	T	G	T	A	A	C	A	T	T	A	G	G	G	A	G	G	A	C	T	T	G	A	A	A	G	A	G	C	C	A	C
1154	Delta	>134664|29662|29890	C	A	A	T	C	T	T	T	A	A	T	C	A	G	T	G	T	G	T	A	A	C	A	T	T	A	G	G	G	A	G	G	A	C	T	T	G	A	A	A	G	A	G	C	C	A	C
1155	Delta	>134663|29662|29890	C	A	A	T	C	T	T	T	A	A	T	C	A	G	T	G	T	G	T	A	A	C	A	T	T	A	G	G	G	A	G	G	A	C	T	T	G	A	A	A	G	A	G	C	C	A	C
1156	Delta	>134662|29662|29890	C	A	A	T	C	T	T	T	A	A	T	C	A	G	T	G	T	G	T	A	A	C	A	T	T	A	G	G	G	A	G	G	A	C	T	T	G	A	A	A	G	A	G	C	C	A	C
1157	Delta	>134661|29662|29890	C	A	A	T	C	T	T	T	A	A	T	C	A	G	T	G	T	G	T	A	A	C	A	T	T	A	G	G	G	A	G	G	A	C	T	T	G	A	A	A	G	A	G	C	C	A	C
1158	Delta	>134660|29662|29890	C	A	A	T	C	T	T	T	A	A	T	C	A	G	T	G	T	G	T	A	A	C	A	T	T	A	G	G	G	A	G	G	A	C	T	T	G	A	A	A	G	A	G	C	C	A	C
1159	Delta	>134659|29662|29890	C	A	A	T	C	T	T	T	A	A	T	C	A	G	T	G	T	G	T	A	A	C	A	T	T	A	G	G	G	A	G	G	A	C	T	T	G	A	A	A	G	A	G	C	C	A	C
1160	Delta	>134658|29662|29890	C	A	A	T	C	T	T	T	A	A	T	C	A	G	T	G	T	G	T	A	A	C	A	T	T	A	G	G	G	A	G	G	A	C	T	T	G	A	A	A	G	A	G	C	C	A	C
1161	Delta	>134657|29662|29890	C	A	A	T	C	T	T	T	A	A	T	C	A	G	T	G	T	G	T	A	A	C	A	T	T	A	G	G	G	A	G	G	A	C	T	T	G	A	A	A	G	A	G	C	C	A	C
1162	Delta	>134655|29662|29890	C	A	A	T	C	T	T	T	A	A	T	C	A	G	T	G	T	G	T	A	A	C	A	T	T	A	G	G	G	A	G	G	A	C	T	T	G	A	A	A	G	A	G	C	C	A	C
1163	Delta	>134654|29662|29890	C	A	A	T	C	T	T	T	A	A	T	C	A	G	T	G	T	G	T	A	A	C	A	T	T	A	G	G	G	A	G	G	A	C	T	T	G	A	A	A	G	A	G	C	C	A	C
1164	Delta	>134653|29662|29890	C	A	A	T	C	T	T	T	A	A	T	C	A	G	T	G	T	G	T	A	A	C	A	T	T	A	G	G	G	A	G	G	A	C	T	T	G	A	A	A	G	A	G	C	C	A	C
1165	Delta	>134652|29662|29890	C	A	A	T	C	T	T	T	A	A	T	C	A	G	T	G	T	G	T	A	A	C	A	T	T	A	G	G	G	A	G	G	A	C	T	T	G	A	A	A	G	A	G	C	C	A	C
1166	Delta	>134651|29662|29890	C	A	A	T	C	T	T	T	A	A	T	C	A	G	T	G	T	G	T	A	A	C	A	T	T	A	G	G	G	A	G	G	A	C	T	T	G	A	A	A	G	A	G	C	C	A	C
1167	Delta	>134649|29662|29890	C	A	A	T	C	T	T	T	A	A	T	C	A	G	T	G	T	G	T	A	A	C	A	T	T	A	G	G	G	A	G	G	A	C	T	T	G	A	A	A	G	A	G	C	C	A	C
1168	Delta	>134647|29662|29890	C	A	A	T	C	T	T	T	A	A	T	C	A	G	T	G	T	G	T	A	A	C	A	T	T	A	G	G	G	A	G	G	A	C	T	T	G	A	A	A	G	A	G	C	C	A	C
1169	Delta	>134646|29659|29887	C	A	A	T	C	T	T	T	A	A	T	C	A	G	T	G	T	G	T	A	A	C	A	T	T	A	G	G	G	A	G	G	A	C	T	T	G	A	A	A	G	A	G	C	C	A	C
1170	Delta	>134382|29653|29881	C	A	A	T	C	T	T	T	A	A	T	C	A	G	T	G	T	G	T	A	A	C	A	T	T	A	G	G	G	A	G	G	A	C	T	T	G	A	A	A	G	A	G	C	C	A	C
1171	Delta	>134377|29662|29890	C	A	A	T	C	T	T	T	A	A	T	C	A	G	T	G	T	G	T	A	A	C	A	T	T	A	G	G	G	A	G	G	A	C	T	T	G	A	A	A	G	A	G	C	C	A	C
1172	Delta	>134375|29662|29890	C	A	A	T	C	T	T	T	A	A	T	C	A	G	T	G	T	G	T	A	A	C	A	T	T	A	G	G	G	A	G	G	A	C	T	T	G	A	A	A	G	A	G	C	C	A	C
1173	Delta	>134373|29660|29888	C	A	A	T	C	T	T	T	A	A	T	C	A	G	T	G	T	G	T	A	A	C	A	T	T	A	G	G	G	A	G	G	A	C	T	T	G	A	A	A	G	A	G	C	C	A	C
1174	Delta	>134095|29662|29890	C	A	A	T	C	T	T	T	A	A	T	C	A	G	T	G	T	G	T	A	A	C	A	T	T	A	G	G	G	A	G	G	A	C	T	T	G	A	A	A	G	A	G	C	C	A	C
1175	Delta	>134092|29660|29888	C	A	A	T	C	T	T	T	A	A	T	C	A	G	T	G	T	G	T	A	A	C	A	T	T	A	G	G	G	A	G	G	A	C	T	T	G	A	A	A	G	A	G	C	C	A	C
1176	Delta	>134087|29661|29889	C	A	A	T	C	T	T	T	A	A	T	C	A	G	T	G	T	G	T	A	A	C	A	T	T	A	G	G	G	A	G	G	A	C	T	T	G	A	A	A	G	A	G	C	C	A	C
1177	Delta	>134064|29662|29890	C	A	A	T	C	T	T	T	A	A	T	C	A	G	T	G	T	G	T	A	A	C	A	T	T	A	G	G	G	A	G	G	A	C	T	T	G	A	A	A	G	A	G	C	C	A	C
1178	Delta	>134050|29662|29890	C	A	A	T	C	T	T	T	A	A	T	C	A	G	T	G	T	G	T	A	A	C	A	T	T	A	G	G	G	A	G	G	A	C	T	T	G	A	A	A	G	A	G	C	C	A	C
1179	Delta	>133911|29639|29867	C	A	A	T	C	T	T	T	A	A	T	C	A	G	T	G	T	G	T	A	A	C	A	T	T	A	G	G	G	A	G	G	A	C	T	T	G	A	A	A	G	A	G	C	C	A	C
1180	Delta	>133412|29662|29890	C	A	A	T	C	T	T	T	A	A	T	C	A	G	T	G	T	G	T	A	A	C	A	T	T	A	G	G	G	A	G	G	A	C	T	T	G	A	A	A	G	A	G	C	C	A	C
1181	Delta	>133408|29661|29889	C	A	A	T	C	T	T	T	A	A	T	C	A	G	T	G	T	G	T	A	A	C	A	T	T	A	G	G	G	A	G	G	A	C	T	T	G	A	A	A	G	A	G	C	C	A	C
1182	Delta	>133403|29661|29889	C	A	A	T	C	T	T	T	A	A	T	C	A	G	T	G	T	G	T	A	A	C	A	T	T	A	G	G	G	A	G	G	A	C	T	T	G	A	A	A	G	A	G	C	C	A	C
1183	Delta	>133390|29663|29891	C	A	A	T	C	T	T	T	A	A	T	C	A	G	T	G	T	G	T	A	A	C	A	T	T	A	G	G	G	A	G	G	A	C	T	T	G	A	A	A	G	A	G	C	C	A	C
1184	Delta	>133389|29662|29890	C	A	A	T	C	T	T	T	A	A	T	C	A	G	T	G	T	G	T	A	A	C	A	T	T	A	G	G	G	A	G	G	A	C	T	T	G	A	A	A	G	A	G	C	C	A	C
1185	Delta	>132984|29629|29857	C	A	A	T	C	T	T	T	A	A	T	C	A	G	T	G	T	G	T	A	A	C	A	T	T	A	G	G	G	A	G	G	A	C	T	T	G	A	A	A	G	A	G	C	C	A	C
1186	Delta	>132949|29668|29896	C	A	A	T	C	T	T	T	A	A	T	C	A	G	T	G	T	G	T	A	A	C	A	T	T	A	G	G	G	A	G	G	A	C	T	T	G	A	A	A	G	A	G	C	C	A	C
1187	Delta	>132560|29627|29855	C	A	A	T	C	T	T	T	A	A	T	C	A	G	T	G	T	G	T	A	A	C	A	T	T	A	G	G	G	A	G	G	A	C	T	T	G	A	A	A	G	A	G	C	C	A	C
1188	Delta	>131470|29662|29890	C	A	A	T	C	T	T	T	A	A	T	C	A	G	T	G	T	G	T	A	A	C	A	T	T	A	G	G	G	A	G	G	A	C	T	T	G	A	A	A	G	A	G	C	C	A	C
1189	Delta	>130975|29660|29888	C	A	A	T	C	T	T	T	A	A	T	C	A	G	T	G	T	G	T	A	A	C	A	T	T	A	G	G	G	A	G	G	A	C	T	T	G	A	A	A	G	A	G	C	C	A	C
1190	Delta	>130963|29623|29851	C	A	A	T	C	T	T	T	A	A	T	C	A	G	T	G	T	G	T	A	A	C	A	T	T	A	G	G	G	A	G	G	A	C	T	T	G	A	A	A	G	A	G	C	C	A	C
1191	Delta	>130949|29633|29861	C	A	A	T	C	T	T	T	A	A	T	C	A	G	T	G	T	G	T	A	A	C	A	T	T	A	G	G	G	A	G	G	A	C	T	T	G	A	A	A	G	A	G	C	C	A	C
1192	Delta	>130947|29661|29889	C	A	A	T	C	T	T	T	A	A	T	C	A	G	T	G	T	G	T	A	A	C	A	T	T	A	G	G	G	A	G	G	A	C	T	T	G	A	A	A	G	A	G	C	C	A	C
1193	Delta	>130923|29660|29888	C	A	A	T	C	T	T	T	A	A	T	C	A	G	T	G	T	G	T	A	A	C	A	T	T	A	G	G	G	A	G	G	A	C	T	T	G	A	A	A	G	A	G	C	C	A	C
1194	Delta	>130841|29659|29887	C	A	A	T	C	T	T	T	A	A	T	C	A	G	T	G	T	G	T	A	A	C	A	T	T	A	G	G	G	A	G	G	A	C	T	T	G	A	A	A	G	A	G	C	C	A	C
1195	Delta	>130837|29660|29888	C	A	A	T	C	T	T	T	A	A	T	C	A	G	T	G	T	G	T	A	A	C	A	T	T	A	G	G	G	A	G	G	A	C	T	T	G	A	A	A	G	A	G	C	C	A	C
1196	Delta	>130568|29652|29880	C	A	A	T	C	T	T	T	A	A	T	C	A	G	T	G	T	G	T	A	A	C	A	T	T	A	G	G	G	A	G	G	A	C	T	T	G	A	A	A	G	A	G	C	C	A	C
1197	Delta	>130552|29662|29890	C	A	A	T	C	T	T	T	A	A	T	C	A	G	T	G	T	G	T	A	A	C	A	T	T	A	G	G	G	A	G	G	A	C	T	T	G	A	A	A	G	A	G	C	C	A	C
1198	Delta	>130551|29645|29873	C	A	A	T	C	T	T	T	A	A	T	C	A	G	T	G	T	G	T	A	A	C	A	T	T	A	G	G	G	A	G	G	A	C	T	T	G	A	A	A	G	A	G	C	C	A	C
1199	Delta	>130539|29660|29888	C	A	A	T	C	T	T	T	A	A	T	C	A	G	T	G	T	G	T	A	A	C	A	T	T	A	G	G	G	A	G	G	A	C	T	T	G	A	A	A	G	A	G	C	C	A	C
1200	Delta	>130305|29660|29888	C	A	A	T	C	T	T	T	A	A	T	C	A	G	T	G	T	G	T	A	A	C	A	T	T	A	G	G	G	A	G	G	A	C	T	T	G	A	A	A	G	A	G	C	C	A	C
1201	Delta	>130118|29652|29880	C	A	A	T	C	T	T	T	A	A	T	C	A	G	T	G	T	G	T	A	A	C	A	T	T	A	G	G	G	A	G	G	A	C	T	T	G	A	A	A	G	A	G	C	C	A	C
1202	Delta	>130098|29619|29847	C	A	A	T	C	T	T	T	A	A	T	C	A	G	T	G	T	G	T	A	A	C	A	T	T	A	G	G	G	A	G	G	A	C	T	T	G	A	A	A	G	A	G	C	C	A	C
1203	Delta	>130097|29657|29885	C	A	A	T	C	T	T	T	A	A	T	C	A	G	T	G	T	G	T	A	A	C	A	T	T	A	G	G	G	A	G	G	A	C	T	T	G	A	A	A	G	A	G	C	C	A	C
1204	Delta	>129962|29661|29889	C	A	A	T	C	T	T	T	A	A	T	C	A	G	T	G	T	G	T	A	A	C	A	T	T	A	G	G	G	A	G	G	A	C	T	T	G	A	A	A	G	A	G	C	C	A	C
1205	Delta	>129456|29624|29852	C	A	A	T	C	T	T	T	A	A	T	C	A	G	T	G	T	G	T	A	A	C	A	T	T	A	G	G	G	A	G	G	A	C	T	T	G	A	A	A	G	A	G	C	C	A	C
1206	Delta	>129452|29661|29889	C	A	A	T	C	T	T	T	A	A	T	C	A	G	T	G	T	G	T	A	A	C	A	T	T	A	G	G	G	A	G	G	A	C	T	T	G	A	A	A	G	A	G	C	C	A	C
1207	Delta	>129449|29660|29888	C	A	A	T	C	T	T	T	A	A	T	C	A	G	T	G	T	G	T	A	A	C	A	T	T	A	G	G	G	A	G	G	A	C	T	T	G	A	A	A	G	A	G	C	C	A	C
1208	Delta	>129447|29632|29860	C	A	A	T	C	T	T	T	A	A	T	C	A	G	T	G	T	G	T	A	A	C	A	T	T	A	G	G	G	A	G	G	A	C	T	T	G	A	A	A	G	A	G	C	C	A	C
1209	Delta	>129425|29660|29888	C	A	A	T	C	T	T	T	A	A	T	C	A	G	T	G	T	G	T	A	A	C	A	T	T	A	G	G	G	A	G	G	A	C	T	T	G	A	A	A	G	A	G	C	C	A	C
1210	Delta	>129418|29660|29888	C	A	A	T	C	T	T	T	A	A	T	C	A	G	T	G	T	G	T	A	A	C	A	T	T	A	G	G	G	A	G	G	A	C	T	T	G	A	A	A	G	A	G	C	C	A	C
1211	Delta	>129383|29648|29876	C	A	A	T	C	T	T	T	A	A	T	C	A	G	T	G	T	G	T	A	A	C	A	T	T	A	G	G	G	A	G	G	A	C	T	T	G	A	A	A	G	A	G	C	C	A	C
1212	Delta	>129380|29654|29882	C	A	A	T	C	T	T	T	A	A	T	C	A	G	T	G	T	G	T	A	A	C	A	T	T	A	G	G	G	A	G	G	A	C	T	T	G	A	A	A	G	A	G	C	C	A	C
1213	Delta	>129306|29655|29883	C	A	A	T	C	T	T	T	A	A	T	C	A	G	T	G	T	G	T	A	A	C	A	T	T	A	G	G	G	A	G	G	A	C	T	T	G	A	A	A	G	A	G	C	C	A	C
1214	Delta	>129301|29639|29867	C	A	A	T	C	T	T	T	A	A	T	C	A	G	T	G	T	G	T	A	A	C	A	T	T	A	G	G	G	A	G	G	A	C	T	T	G	A	A	A	G	A	G	C	C	A	C
1215	Delta	>129270|29631|29859	C	A	A	T	C	T	T	T	A	A	T	C	A	G	T	G	T	G	T	A	A	C	A	T	T	A	G	G	G	A	G	G	A	C	T	T	G	A	A	A	G	A	G	C	C	A	C
1216	Delta	>129258|29636|29864	C	A	A	T	C	T	T	T	A	A	T	C	A	G	T	G	T	G	T	A	A	C	A	T	T	A	G	G	G	A	G	G	A	C	T	T	G	A	A	A	G	A	G	C	C	A	C
1217	Delta	>129032|29659|29887	C	A	A	T	C	T	T	T	A	A	T	C	A	G	T	G	T	G	T	A	A	C	A	T	T	A	G	G	G	A	G	G	A	C	T	T	G	A	A	A	G	A	G	C	C	A	C
1218	Delta	>129030|29625|29853	C	A	A	T	C	T	T	T	A	A	T	C	A	G	T	G	T	G	T	A	A	C	A	T	T	A	G	G	G	A	G	G	A	C	T	T	G	A	A	A	G	A	G	C	C	A	C
1219	Delta	>129024|29660|29888	C	A	A	T	C	T	T	T	A	A	T	C	A	G	T	G	T	G	T	A	A	C	A	T	T	A	G	G	G	A	G	G	A	C	T	T	G	A	A	A	G	A	G	C	C	A	C
1220	Delta	>129023|29627|29855	C	A	A	T	C	T	T	T	A	A	T	C	A	G	T	G	T	G	T	A	A	C	A	T	T	A	G	G	G	A	G	G	A	C	T	T	G	A	A	A	G	A	G	C	C	A	C
1221	Delta	>129015|29658|29886	C	A	A	T	C	T	T	T	A	A	T	C	A	G	T	G	T	G	T	A	A	C	A	T	T	A	G	G	G	A	G	G	A	C	T	T	G	A	A	A	G	A	G	C	C	A	C
1222	Delta	>129014|29660|29888	C	A	A	T	C	T	T	T	A	A	T	C	A	G	T	G	T	G	T	A	A	C	A	T	T	A	G	G	G	A	G	G	A	C	T	T	G	A	A	A	G	A	G	C	C	A	C
1223	Delta	>129011|29661|29889	C	A	A	T	C	T	T	T	A	A	T	C	A	G	T	G	T	G	T	A	A	C	A	T	T	A	G	G	G	A	G	G	A	C	T	T	G	A	A	A	G	A	G	C	C	A	C
1224	Delta	>128987|29655|29883	C	A	A	T	C	T	T	T	A	A	T	C	A	G	T	G	T	G	T	A	A	C	A	T	T	A	G	G	G	A	G	G	A	C	T	T	G	A	A	A	G	A	G	C	C	A	C
1225	Delta	>128983|29659|29887	C	A	A	T	C	T	T	T	A	A	T	C	A	G	T	G	T	G	T	A	A	C	A	T	T	A	G	G	G	A	G	G	A	C	T	T	G	A	A	A	G	A	G	C	C	A	C
1226	Delta	>128969|29627|29855	C	A	A	T	C	T	T	T	A	A	T	C	A	G	T	G	T	G	T	A	A	C	A	T	T	A	G	G	G	A	G	G	A	C	T	T	G	A	A	A	G	A	G	C	C	A	C
1227	Delta	>128966|29660|29888	C	A	A	T	C	T	T	T	A	A	T	C	A	G	T	G	T	G	T	A	A	C	A	T	T	A	G	G	G	A	G	G	A	C	T	T	G	A	A	A	G	A	G	C	C	A	C
1228	Delta	>128965|29661|29889	C	A	A	T	C	T	T	T	A	A	T	C	A	G	T	G	T	G	T	A	A	C	A	T	T	A	G	G	G	A	G	G	A	C	T	T	G	A	A	A	G	A	G	C	C	A	C
1229	Delta	>128959|29660|29888	C	A	A	T	C	T	T	T	A	A	T	C	A	G	T	G	T	G	T	A	A	C	A	T	T	A	G	G	G	A	G	G	A	C	T	T	G	A	A	A	G	A	G	C	C	A	C
1230	Delta	>128949|29661|29889	C	A	A	T	C	T	T	T	A	A	T	C	A	G	T	G	T	G	T	A	A	C	A	T	T	A	G	G	G	A	G	G	A	C	T	T	G	A	A	A	G	A	G	C	C	A	C
1231	Delta	>128942|29657|29885	C	A	A	T	C	T	T	T	A	A	T	C	A	G	T	G	T	G	T	A	A	C	A	T	T	A	G	G	G	A	G	G	A	C	T	T	G	A	A	A	G	A	G	C	C	A	C
1232	Delta	>128935|29660|29888	C	A	A	T	C	T	T	T	A	A	T	C	A	G	T	G	T	G	T	A	A	C	A	T	T	A	G	G	G	A	G	G	A	C	T	T	G	A	A	A	G	A	G	C	C	A	C
1233	Delta	>128930|29649|29877	C	A	A	T	C	T	T	T	A	A	T	C	A	G	T	G	T	G	T	A	A	C	A	T	T	A	G	G	G	A	G	G	A	C	T	T	G	A	A	A	G	A	G	C	C	A	C
1234	Delta	>128919|29627|29855	C	A	A	T	C	T	T	T	A	A	T	C	A	G	T	G	T	G	T	A	A	C	A	T	T	A	G	G	G	A	G	G	A	C	T	T	G	A	A	A	G	A	G	C	C	A	C
1235	Delta	>128899|29631|29859	C	A	A	T	C	T	T	T	A	A	T	C	A	G	T	G	T	G	T	A	A	C	A	T	T	A	G	G	G	A	G	G	A	C	T	T	G	A	A	A	G	A	G	C	C	A	C
1236	Delta	>128793|29652|29880	C	A	A	T	C	T	T	T	A	A	T	C	A	G	T	G	T	G	T	A	A	C	A	T	T	A	G	G	G	A	G	G	A	C	T	T	G	A	A	A	G	A	G	C	C	A	C
1237	Delta	>128602|29660|29888	C	A	A	T	C	T	T	T	A	A	T	C	A	G	T	G	T	G	T	A	A	C	A	T	T	A	G	G	G	A	G	G	A	C	T	T	G	A	A	A	G	A	G	C	C	A	C
1238	Delta	>128597|29662|29890	C	A	A	T	C	T	T	T	A	A	T	C	A	G	T	G	T	G	T	A	A	C	A	T	T	A	G	G	G	A	G	G	A	C	T	T	G	A	A	A	G	A	G	C	C	A	C
1239	Delta	>128596|29661|29889	C	A	A	T	C	T	T	T	A	A	T	C	A	G	T	G	T	G	T	A	A	C	A	T	T	A	G	G	G	A	G	G	A	C	T	T	G	A	A	A	G	A	G	C	C	A	C
1240	Delta	>128594|29660|29888	C	A	A	T	C	T	T	T	A	A	T	C	A	G	T	G	T	G	T	A	A	C	A	T	T	A	G	G	G	A	G	G	A	C	T	T	G	A	A	A	G	A	G	C	C	A	C
1241	Delta	>128592|29660|29888	C	A	A	T	C	T	T	T	A	A	T	C	A	G	T	G	T	G	T	A	A	C	A	T	T	A	G	G	G	A	G	G	A	C	T	T	G	A	A	A	G	A	G	C	C	A	C
1242	Delta	>128588|29660|29888	C	A	A	T	C	T	T	T	A	A	T	C	A	G	T	G	T	G	T	A	A	C	A	T	T	A	G	G	G	A	G	G	A	C	T	T	G	A	A	A	G	A	G	C	C	A	C
1243	Delta	>128585|29661|29889	C	A	A	T	C	T	T	T	A	A	T	C	A	G	T	G	T	G	T	A	A	C	A	T	T	A	G	G	G	A	G	G	A	C	T	T	G	A	A	A	G	A	G	C	C	A	C
1244	Delta	>128578|29625|29853	C	A	A	T	C	T	T	T	A	A	T	C	A	G	T	G	T	G	T	A	A	C	A	T	T	A	G	G	G	A	G	G	A	C	T	T	G	A	A	A	G	A	G	C	C	A	C
1245	Delta	>128576|29654|29882	C	A	A	T	C	T	T	T	A	A	T	C	A	G	T	G	T	G	T	A	A	C	A	T	T	A	G	G	G	A	G	G	A	C	T	T	G	A	A	A	G	A	G	C	C	A	C
1246	Delta	>128575|29660|29888	C	A	A	T	C	T	T	T	A	A	T	C	A	G	T	G	T	G	T	A	A	C	A	T	T	A	G	G	G	A	G	G	A	C	T	T	G	A	A	A	G	A	G	C	C	A	C
1247	Delta	>128572|29659|29887	C	A	A	T	C	T	T	T	A	A	T	C	A	G	T	G	T	G	T	A	A	C	A	T	T	A	G	G	G	A	G	G	A	C	T	T	G	A	A	A	G	A	G	C	C	A	C
1248	Delta	>128569|29659|29887	C	A	A	T	C	T	T	T	A	A	T	C	A	G	T	G	T	G	T	A	A	C	A	T	T	A	G	G	G	A	G	G	A	C	T	T	G	A	A	A	G	A	G	C	C	A	C
1249	Delta	>128568|29658|29886	C	A	A	T	C	T	T	T	A	A	T	C	A	G	T	G	T	G	T	A	A	C	A	T	T	A	G	G	G	A	G	G	A	C	T	T	G	A	A	A	G	A	G	C	C	A	C
1250	Delta	>128563|29656|29884	C	A	A	T	C	T	T	T	A	A	T	C	A	G	T	G	T	G	T	A	A	C	A	T	T	A	G	G	G	A	G	G	A	C	T	T	G	A	A	A	G	A	G	C	C	A	C
1251	Delta	>128562|29656|29884	C	A	A	T	C	T	T	T	A	A	T	C	A	G	T	G	T	G	T	A	A	C	A	T	T	A	G	G	G	A	G	G	A	C	T	T	G	A	A	A	G	A	G	C	C	A	C
1252	Delta	>128540|29655|29883	C	A	A	T	C	T	T	T	A	A	T	C	A	G	T	G	T	G	T	A	A	C	A	T	T	A	G	G	G	A	G	G	A	C	T	T	G	A	A	A	G	A	G	C	C	A	C
1253	Delta	>128317|29646|29874	C	A	A	T	C	T	T	T	A	A	T	C	A	G	T	G	T	G	T	A	A	C	A	T	T	A	G	G	G	A	G	G	A	C	T	T	G	A	A	A	G	A	G	C	C	A	C
1254	Delta	>128269|29651|29879	C	A	A	T	C	T	T	T	A	A	T	C	A	G	T	G	T	G	T	A	A	C	A	T	T	A	G	G	G	A	G	G	A	C	T	T	G	A	A	A	G	A	G	C	C	A	C
1255	Delta	>128256|29658|29886	C	A	A	T	C	T	T	T	A	A	T	C	A	G	T	G	T	G	T	A	A	C	A	T	T	A	G	G	G	A	G	G	A	C	T	T	G	A	A	A	G	A	G	C	C	A	C
1256	Delta	>128251|29660|29888	C	A	A	T	C	T	T	T	A	A	T	C	A	G	T	G	T	G	T	A	A	C	A	T	T	A	G	G	G	A	G	G	A	C	T	T	G	A	A	A	G	A	G	C	C	A	C
1257	Delta	>128230|29659|29887	C	A	A	T	C	T	T	T	A	A	T	C	A	G	T	G	T	G	T	A	A	C	A	T	T	A	G	G	G	A	G	G	A	C	T	T	G	A	A	A	G	A	G	C	C	A	C
1258	Delta	>128208|29660|29888	C	A	A	T	C	T	T	T	A	A	T	C	A	G	T	G	T	G	T	A	A	C	A	T	T	A	G	G	G	A	G	G	A	C	T	T	G	A	A	A	G	A	G	C	C	A	C
1259	Delta	>128186|29654|29882	C	A	A	T	C	T	T	T	A	A	T	C	A	G	T	G	T	G	T	A	A	C	A	T	T	A	G	G	G	A	G	G	A	C	T	T	G	A	A	A	G	A	G	C	C	A	C
1260	Delta	>128146|29660|29888	C	A	A	T	C	T	T	T	A	A	T	C	A	G	T	G	T	G	T	A	A	C	A	T	T	A	G	G	G	A	G	G	A	C	T	T	G	A	A	A	G	A	G	C	C	A	C
1261	Delta	>128132|29650|29878	C	A	A	T	C	T	T	T	A	A	T	C	A	G	T	G	T	G	T	A	A	C	A	T	T	A	G	G	G	A	G	G	A	C	T	T	G	A	A	A	G	A	G	C	C	A	C
1262	Delta	>128106|29660|29888	C	A	A	T	C	T	T	T	A	A	T	C	A	G	T	G	T	G	T	A	A	C	A	T	T	A	G	G	G	A	G	G	A	C	T	T	G	A	A	A	G	A	G	C	C	A	C
1263	Delta	>128048|29659|29887	C	A	A	T	C	T	T	T	A	A	T	C	A	G	T	G	T	G	T	A	A	C	A	T	T	A	G	G	G	A	G	G	A	C	T	T	G	A	A	A	G	A	G	C	C	A	C
1264	Delta	>128041|29658|29886	C	A	A	T	C	T	T	T	A	A	T	C	A	G	T	G	T	G	T	A	A	C	A	T	T	A	G	G	G	A	G	G	A	C	T	T	G	A	A	A	G	A	G	C	C	A	C
1265	Delta	>128040|29653|29881	C	A	A	T	C	T	T	T	A	A	T	C	A	G	T	G	T	G	T	A	A	C	A	T	T	A	G	G	G	A	G	G	A	C	T	T	G	A	A	A	G	A	G	C	C	A	C
1266	Delta	>128022|29651|29879	C	A	A	T	C	T	T	T	A	A	T	C	A	G	T	G	T	G	T	A	A	C	A	T	T	A	G	G	G	A	G	G	A	C	T	T	G	A	A	A	G	A	G	C	C	A	C
1267	Delta	>127916|29660|29888	C	A	A	T	C	T	T	T	A	A	T	C	A	G	T	G	T	G	T	A	A	C	A	T	T	A	G	G	G	A	G	G	A	C	T	T	G	A	A	A	G	A	G	C	C	A	C
1268	Delta	>127915|29658|29886	C	A	A	T	C	T	T	T	A	A	T	C	A	G	T	G	T	G	T	A	A	C	A	T	T	A	G	G	G	A	G	G	A	C	T	T	G	A	A	A	G	A	G	C	C	A	C
1269	Delta	>127907|29630|29858	C	A	A	T	C	T	T	T	A	A	T	C	A	G	T	G	T	G	T	A	A	C	A	T	T	A	G	G	G	A	G	G	A	C	T	T	G	A	A	A	G	A	G	C	C	A	C
1270	Delta	>127898|29660|29888	C	A	A	T	C	T	T	T	A	A	T	C	A	G	T	G	T	G	T	A	A	C	A	T	T	A	G	G	G	A	G	G	A	C	T	T	G	A	A	A	G	A	G	C	C	A	C
1271	Delta	>127893|29660|29888	C	A	A	T	C	T	T	T	A	A	T	C	A	G	T	G	T	G	T	A	A	C	A	T	T	A	G	G	G	A	G	G	A	C	T	T	G	A	A	A	G	A	G	C	C	A	C
1272	Delta	>127890|29659|29887	C	A	A	T	C	T	T	T	A	A	T	C	A	G	T	G	T	G	T	A	A	C	A	T	T	A	G	G	G	A	G	G	A	C	T	T	G	A	A	A	G	A	G	C	C	A	C
1273	Delta	>127878|29660|29888	C	A	A	T	C	T	T	T	A	A	T	C	A	G	T	G	T	G	T	A	A	C	A	T	T	A	G	G	G	A	G	G	A	C	T	T	G	A	A	A	G	A	G	C	C	A	C
1274	Delta	>127753|29650|29878	C	A	A	T	C	T	T	T	A	A	T	C	A	G	T	G	T	G	T	A	A	C	A	T	T	A	G	G	G	A	G	G	A	C	T	T	G	A	A	A	G	A	G	C	C	A	C
1275	Delta	>127751|29652|29880	C	A	A	T	C	T	T	T	A	A	T	C	A	G	T	G	T	G	T	A	A	C	A	T	T	A	G	G	G	A	G	G	A	C	T	T	G	A	A	A	G	A	G	C	C	A	C
1276	Delta	>127750|29652|29880	C	A	A	T	C	T	T	T	A	A	T	C	A	G	T	G	T	G	T	A	A	C	A	T	T	A	G	G	G	A	G	G	A	C	T	T	G	A	A	A	G	A	G	C	C	A	C
1277	Delta	>127262|29660|29888	C	A	A	T	C	T	T	T	A	A	T	C	A	G	T	G	T	G	T	A	A	C	A	T	T	A	G	G	G	A	G	G	A	C	T	T	G	A	A	A	G	A	G	C	C	A	C
1278	Delta	>127259|29652|29880	C	A	A	T	C	T	T	T	A	A	T	C	A	G	T	G	T	G	T	A	A	C	A	T	T	A	G	G	G	A	G	G	A	C	T	T	G	A	A	A	G	A	G	C	C	A	C
1279	Delta	>127221|29658|29886	C	A	A	T	C	T	T	T	A	A	T	C	A	G	T	G	T	G	T	A	A	C	A	T	T	A	G	G	G	A	G	G	A	C	T	T	G	A	A	A	G	A	G	C	C	A	C
1280	Delta	>127065|29659|29887	C	A	A	T	C	T	T	T	A	A	T	C	A	G	T	G	T	G	T	A	A	C	A	T	T	A	G	G	G	A	G	G	A	C	T	T	G	A	A	A	G	A	G	C	C	A	C
1281	Delta	>127058|29661|29889	C	A	A	T	C	T	T	T	A	A	T	C	A	G	T	G	T	G	T	A	A	C	A	T	T	A	G	G	G	A	G	G	A	C	T	T	G	A	A	A	G	A	G	C	C	A	C
1282	Delta	>127057|29655|29883	C	A	A	T	C	T	T	T	A	A	T	C	A	G	T	G	T	G	T	A	A	C	A	T	T	A	G	G	G	A	G	G	A	C	T	T	G	A	A	A	G	A	G	C	C	A	C
1283	Delta	>127050|29651|29879	C	A	A	T	C	T	T	T	A	A	T	C	A	G	T	G	T	G	T	A	A	C	A	T	T	A	G	G	G	A	G	G	A	C	T	T	G	A	A	A	G	A	G	C	C	A	C
1284	Delta	>127048|29648|29876	C	A	A	T	C	T	T	T	A	A	T	C	A	G	T	G	T	G	T	A	A	C	A	T	T	A	G	G	G	A	G	G	A	C	T	T	G	A	A	A	G	A	G	C	C	A	C
1285	Delta	>127043|29654|29882	C	A	A	T	C	T	T	T	A	A	T	C	A	G	T	G	T	G	T	A	A	C	A	T	T	A	G	G	G	A	G	G	A	C	T	T	G	A	A	A	G	A	G	C	C	A	C
1286	Delta	>127042|29625|29853	C	A	A	T	C	T	T	T	A	A	T	C	A	G	T	G	T	G	T	A	A	C	A	T	T	A	G	G	G	A	G	G	A	C	T	T	G	A	A	A	G	A	G	C	C	A	C
1287	Delta	>127008|29625|29853	C	A	A	T	C	T	T	T	A	A	T	C	A	G	T	G	T	G	T	A	A	C	A	T	T	A	G	G	G	A	G	G	A	C	T	T	G	A	A	A	G	A	G	C	C	A	C
1288	Delta	>126864|29660|29888	C	A	A	T	C	T	T	T	A	A	T	C	A	G	T	G	T	G	T	A	A	C	A	T	T	A	G	G	G	A	G	G	A	C	T	T	G	A	A	A	G	A	G	C	C	A	C
1289	Delta	>126803|29658|29886	C	A	A	T	C	T	T	T	A	A	T	C	A	G	T	G	T	G	T	A	A	C	A	T	T	A	G	G	G	A	G	G	A	C	T	T	G	A	A	A	G	A	G	C	C	A	C
1290	Delta	>126800|29625|29853	C	A	A	T	C	T	T	T	A	A	T	C	A	G	T	G	T	G	T	A	A	C	A	T	T	A	G	G	G	A	G	G	A	C	T	T	G	A	A	A	G	A	G	C	C	A	C
1291	Delta	>126792|29660|29888	C	A	A	T	C	T	T	T	A	A	T	C	A	G	T	G	T	G	T	A	A	C	A	T	T	A	G	G	G	A	G	G	A	C	T	T	G	A	A	A	G	A	G	C	C	A	C
1292	Delta	>126785|29662|29890	C	A	A	T	C	T	T	T	A	A	T	C	A	G	T	G	T	G	T	A	A	C	A	T	T	A	G	G	G	A	G	G	A	C	T	T	G	A	A	A	G	A	G	C	C	A	C
1293	Delta	>126778|29660|29888	C	A	A	T	C	T	T	T	A	A	T	C	A	G	T	G	T	G	T	A	A	C	A	T	T	A	G	G	G	A	G	G	A	C	T	T	G	A	A	A	G	A	G	C	C	A	C
1294	Delta	>126776|29659|29887	C	A	A	T	C	T	T	T	A	A	T	C	A	G	T	G	T	G	T	A	A	C	A	T	T	A	G	G	G	A	G	G	A	C	T	T	G	A	A	A	G	A	G	C	C	A	C
1295	Delta	>126774|29660|29888	C	A	A	T	C	T	T	T	A	A	T	C	A	G	T	G	T	G	T	A	A	C	A	T	T	A	G	G	G	A	G	G	A	C	T	T	G	A	A	A	G	A	G	C	C	A	C
1296	Delta	>126772|29659|29887	C	A	A	T	C	T	T	T	A	A	T	C	A	G	T	G	T	G	T	A	A	C	A	T	T	A	G	G	G	A	G	G	A	C	T	T	G	A	A	A	G	A	G	C	C	A	C
1297	Delta	>126769|29658|29886	C	A	A	T	C	T	T	T	A	A	T	C	A	G	T	G	T	G	T	A	A	C	A	T	T	A	G	G	G	A	G	G	A	C	T	T	G	A	A	A	G	A	G	C	C	A	C
1298	Delta	>126754|29652|29880	C	A	A	T	C	T	T	T	A	A	T	C	A	G	T	G	T	G	T	A	A	C	A	T	T	A	G	G	G	A	G	G	A	C	T	T	G	A	A	A	G	A	G	C	C	A	C
1299	Delta	>126752|29657|29885	C	A	A	T	C	T	T	T	A	A	T	C	A	G	T	G	T	G	T	A	A	C	A	T	T	A	G	G	G	A	G	G	A	C	T	T	G	A	A	A	G	A	G	C	C	A	C
1300	Delta	>126750|29658|29886	C	A	A	T	C	T	T	T	A	A	T	C	A	G	T	G	T	G	T	A	A	C	A	T	T	A	G	G	G	A	G	G	A	C	T	T	G	A	A	A	G	A	G	C	C	A	C
1301	Delta	>126749|29660|29888	C	A	A	T	C	T	T	T	A	A	T	C	A	G	T	G	T	G	T	A	A	C	A	T	T	A	G	G	G	A	G	G	A	C	T	T	G	A	A	A	G	A	G	C	C	A	C
1302	Delta	>126747|29661|29889	C	A	A	T	C	T	T	T	A	A	T	C	A	G	T	G	T	G	T	A	A	C	A	T	T	A	G	G	G	A	G	G	A	C	T	T	G	A	A	A	G	A	G	C	C	A	C
1303	Delta	>126528|29660|29888	C	A	A	T	C	T	T	T	A	A	T	C	A	G	T	G	T	G	T	A	A	C	A	T	T	A	G	G	G	A	G	G	A	C	T	T	G	A	A	A	G	A	G	C	C	A	C
1304	Delta	>126526|29655|29883	C	A	A	T	C	T	T	T	A	A	T	C	A	G	T	G	T	G	T	A	A	C	A	T	T	A	G	G	G	A	G	G	A	C	T	T	G	A	A	A	G	A	G	C	C	A	C
1305	Delta	>126520|29658|29886	C	A	A	T	C	T	T	T	A	A	T	C	A	G	T	G	T	G	T	A	A	C	A	T	T	A	G	G	G	A	G	G	A	C	T	T	G	A	A	A	G	A	G	C	C	A	C
1306	Delta	>126519|29627|29855	C	A	A	T	C	T	T	T	A	A	T	C	A	G	T	G	T	G	T	A	A	C	A	T	T	A	G	G	G	A	G	G	A	C	T	T	G	A	A	A	G	A	G	C	C	A	C
1307	Delta	>126517|29615|29843	C	A	A	T	C	T	T	T	A	A	T	C	A	G	T	G	T	G	T	A	A	C	A	T	T	A	G	G	G	A	G	G	A	C	T	T	G	A	A	A	G	A	G	C	C	A	C
1308	Delta	>126103|29658|29886	C	A	A	T	C	T	T	T	A	A	T	C	A	G	T	G	T	G	T	A	A	C	A	T	T	A	G	G	G	A	G	G	A	C	T	T	G	A	A	A	G	A	G	C	C	A	C
1309	Delta	>125852|29659|29887	C	A	A	T	C	T	T	T	A	A	T	C	A	G	T	G	T	G	T	A	A	C	A	T	T	A	G	G	G	A	G	G	A	C	T	T	G	A	A	A	G	A	G	C	C	A	C
1310	Delta	>125695|29632|29860	C	A	A	T	C	T	T	T	A	A	T	C	A	G	T	G	T	G	T	A	A	C	A	T	T	A	G	G	G	A	G	G	A	C	T	T	G	A	A	A	G	A	G	C	C	A	C
1311	Delta	>125694|29655|29883	C	A	A	T	C	T	T	T	A	A	T	C	A	G	T	G	T	G	T	A	A	C	A	T	T	A	G	G	G	A	G	G	A	C	T	T	G	A	A	A	G	A	G	C	C	A	C
1312	Delta	>125693|29661|29889	C	A	A	T	C	T	T	T	A	A	T	C	A	G	T	G	T	G	T	A	A	C	A	T	T	A	G	G	G	A	G	G	A	C	T	T	G	A	A	A	G	A	G	C	C	A	C
1313	Delta	>125684|29660|29888	C	A	A	T	C	T	T	T	A	A	T	C	A	G	T	G	T	G	T	A	A	C	A	T	T	A	G	G	G	A	G	G	A	C	T	T	G	A	A	A	G	A	G	C	C	A	C
1314	Delta	>125682|29658|29886	C	A	A	T	C	T	T	T	A	A	T	C	A	G	T	G	T	G	T	A	A	C	A	T	T	A	G	G	G	A	G	G	A	C	T	T	G	A	A	A	G	A	G	C	C	A	C
1315	Delta	>125665|29626|29854	C	A	A	T	C	T	T	T	A	A	T	C	A	G	T	G	T	G	T	A	A	C	A	T	T	A	G	G	G	A	G	G	A	C	T	T	G	A	A	A	G	A	G	C	C	A	C
1316	Delta	>125664|29658|29886	C	A	A	T	C	T	T	T	A	A	T	C	A	G	T	G	T	G	T	A	A	C	A	T	T	A	G	G	G	A	G	G	A	C	T	T	G	A	A	A	G	A	G	C	C	A	C
1317	Delta	>125492|29661|29889	C	A	A	T	C	T	T	T	A	A	T	C	A	G	T	G	T	G	T	A	A	C	A	T	T	A	G	G	G	A	G	G	A	C	T	T	G	A	A	A	G	A	G	C	C	A	C
1318	Delta	>125489|29658|29886	C	A	A	T	C	T	T	T	A	A	T	C	A	G	T	G	T	G	T	A	A	C	A	T	T	A	G	G	G	A	G	G	A	C	T	T	G	A	A	A	G	A	G	C	C	A	C
1319	Delta	>125463|29658|29886	C	A	A	T	C	T	T	T	A	A	T	C	A	G	T	G	T	G	T	A	A	C	A	T	T	A	G	G	G	A	G	G	A	C	T	T	G	A	A	A	G	A	G	C	C	A	C
1320	Delta	>125206|29677|29905	C	A	A	T	C	T	T	T	A	A	T	C	A	G	T	G	T	G	T	A	A	C	A	T	T	A	G	G	G	A	G	G	A	C	T	T	G	A	A	A	G	A	G	C	C	A	C
1321	Delta	>125205|29716|29944	C	A	A	T	C	T	T	T	A	A	T	C	A	G	T	G	T	G	T	A	A	C	A	T	T	A	G	G	G	A	G	G	A	C	T	T	G	A	A	A	G	A	G	C	C	A	C
1322	Delta	>125204|29693|29921	C	A	A	T	C	T	T	T	A	A	T	C	A	G	T	G	T	G	T	A	A	C	A	T	T	A	G	G	G	A	G	G	A	C	T	T	G	A	A	A	G	A	G	C	C	A	C
1323	Delta	>125203|29685|29913	C	A	A	T	C	T	T	T	A	A	T	C	A	G	T	G	T	G	T	A	A	C	A	T	T	A	G	G	G	A	G	G	A	C	T	T	G	A	A	A	G	A	G	C	C	A	C
1324	Delta	>125202|29681|29909	C	A	A	T	C	T	T	T	A	A	T	C	A	G	T	G	T	G	T	A	A	C	A	T	T	A	G	G	G	A	G	G	A	C	T	T	G	A	A	A	G	A	G	C	C	A	C
1325	Delta	>125201|29682|29910	C	A	A	T	C	T	T	T	A	A	T	C	A	G	T	G	T	G	T	A	A	C	A	T	T	A	G	G	G	A	G	G	A	C	T	T	G	A	A	A	G	A	G	C	C	A	C
1326	Delta	>125200|29678|29906	C	A	A	T	C	T	T	T	A	A	T	C	A	G	T	G	T	G	T	A	A	C	A	T	T	A	G	G	G	A	G	G	A	C	T	T	G	A	A	A	G	A	G	C	C	A	C
1327	Delta	>125199|29678|29906	C	A	A	T	C	T	T	T	A	A	T	C	A	G	T	G	T	G	T	A	A	C	A	T	T	A	G	G	G	A	G	G	A	C	T	T	G	A	A	A	G	A	G	C	C	A	C
1328	Delta	>125198|29678|29906	C	A	A	T	C	T	T	T	A	A	T	C	A	G	T	G	T	G	T	A	A	C	A	T	T	A	G	G	G	A	G	G	A	C	T	T	G	A	A	A	G	A	G	C	C	A	C
1329	Delta	>125197|29673|29901	C	A	A	T	C	T	T	T	A	A	T	C	A	G	T	G	T	G	T	A	A	C	A	T	T	A	G	G	G	A	G	G	A	C	T	T	G	A	A	A	G	A	G	C	C	A	C
1330	Delta	>125194|29571|29799	C	A	A	T	C	T	T	T	A	A	T	C	A	G	T	G	T	G	T	A	A	C	A	T	T	A	G	G	G	A	G	G	A	C	T	T	G	A	A	A	G	A	G	C	C	A	C
1331	Delta	>125193|29654|29882	C	A	A	T	C	T	T	T	A	A	T	C	A	G	T	G	T	G	T	A	A	C	A	T	T	A	G	G	G	A	G	G	A	C	T	T	G	A	A	A	G	A	G	C	C	A	C
1332	Delta	>125192|29654|29882	C	A	A	T	C	T	T	T	A	A	T	C	A	G	T	G	T	G	T	A	A	C	A	T	T	A	G	G	G	A	G	G	A	C	T	T	G	A	A	A	G	A	G	C	C	A	C
1333	Delta	>125191|29654|29882	C	A	A	T	C	T	T	T	A	A	T	C	A	G	T	G	T	G	T	A	A	C	A	T	T	A	G	G	G	A	G	G	A	C	T	T	G	A	A	A	G	A	G	C	C	A	C
1334	Delta	>125190|29658|29886	C	A	A	T	C	T	T	T	A	A	T	C	A	G	T	G	T	G	T	A	A	C	A	T	T	A	G	G	G	A	G	G	A	C	T	T	G	A	A	A	G	A	G	C	C	A	C
1335	Delta	>125189|29646|29874	C	A	A	T	C	T	T	T	A	A	T	C	A	G	T	G	T	G	T	A	A	C	A	T	T	A	G	G	G	A	G	G	A	C	T	T	G	A	A	A	G	A	G	C	C	A	C
1336	Delta	>125188|29646|29874	C	A	A	T	C	T	T	T	A	A	T	C	A	G	T	G	T	G	T	A	A	C	A	T	T	A	G	G	G	A	G	G	A	C	T	T	G	A	A	A	G	A	G	C	C	A	C
1337	Delta	>125187|29646|29874	C	A	A	T	C	T	T	T	A	A	T	C	A	G	T	G	T	G	T	A	A	C	A	T	T	A	G	G	G	A	G	G	A	C	T	T	G	A	A	A	G	A	G	C	C	A	C
1338	Delta	>125186|29646|29874	C	A	A	T	C	T	T	T	A	A	T	C	A	G	T	G	T	G	T	A	A	C	A	T	T	A	G	G	G	A	G	G	A	C	T	T	G	A	A	A	G	A	G	C	C	A	C
1339	Delta	>125185|29646|29874	C	A	A	T	C	T	T	T	A	A	T	C	A	G	T	G	T	G	T	A	A	C	A	T	T	A	G	G	G	A	G	G	A	C	T	T	G	A	A	A	G	A	G	C	C	A	C
1340	Delta	>125184|29651|29879	C	A	A	T	C	T	T	T	A	A	T	C	A	G	T	G	T	G	T	A	A	C	A	T	T	A	G	G	G	A	G	G	A	C	T	T	G	A	A	A	G	A	G	C	C	A	C
1341	Delta	>125183|29645|29873	C	A	A	T	C	T	T	T	A	A	T	C	A	G	T	G	T	G	T	A	A	C	A	T	T	A	G	G	G	A	G	G	A	C	T	T	G	A	A	A	G	A	G	C	C	A	C
1342	Delta	>125182|29662|29890	C	A	A	T	C	T	T	T	A	A	T	C	A	G	T	G	T	G	T	A	A	C	A	T	T	A	G	G	G	A	G	G	A	C	T	T	G	A	A	A	G	A	G	C	C	A	C
1343	Delta	>125181|29662|29890	C	A	A	T	C	T	T	T	A	A	T	C	A	G	T	G	T	G	T	A	A	C	A	T	T	A	G	G	G	A	G	G	A	C	T	T	G	A	A	A	G	A	G	C	C	A	C
1344	Delta	>125180|29662|29890	C	A	A	T	C	T	T	T	A	A	T	C	A	G	T	G	T	G	T	A	A	C	A	T	T	A	G	G	G	A	G	G	A	C	T	T	G	A	A	A	G	A	G	C	C	A	C
1345	Delta	>125178|29662|29890	C	A	A	T	C	T	T	T	A	A	T	C	A	G	T	G	T	G	T	A	A	C	A	T	T	A	G	G	G	A	G	G	A	C	T	T	G	A	A	A	G	A	G	C	C	A	C
1346	Delta	>125177|29662|29890	C	A	A	T	C	T	T	T	A	A	T	C	A	G	T	G	T	G	T	A	A	C	A	T	T	A	G	G	G	A	G	G	A	C	T	T	G	A	A	A	G	A	G	C	C	A	C
1347	Delta	>125174|29671|29899	C	A	A	T	C	T	T	T	A	A	T	C	A	G	T	G	T	G	T	A	A	C	A	T	T	A	G	G	G	A	G	G	A	C	T	T	G	A	A	A	G	A	G	C	C	A	C
1348	Delta	>125173|29662|29890	C	A	A	T	C	T	T	T	A	A	T	C	A	G	T	G	T	G	T	A	A	C	A	T	T	A	G	G	G	A	G	G	A	C	T	T	G	A	A	A	G	A	G	C	C	A	C
1349	Delta	>125172|29662|29890	C	A	A	T	C	T	T	T	A	A	T	C	A	G	T	G	T	G	T	A	A	C	A	T	T	A	G	G	G	A	G	G	A	C	T	T	G	A	A	A	G	A	G	C	C	A	C
1350	Delta	>125171|29662|29890	C	A	A	T	C	T	T	T	A	A	T	C	A	G	T	G	T	G	T	A	A	C	A	T	T	A	G	G	G	A	G	G	A	C	T	T	G	A	A	A	G	A	G	C	C	A	C
1351	Delta	>125170|29662|29890	C	A	A	T	C	T	T	T	A	A	T	C	A	G	T	G	T	G	T	A	A	C	A	T	T	A	G	G	G	A	G	G	A	C	T	T	G	A	A	A	G	A	G	C	C	A	C
1352	Delta	>125169|29656|29884	C	A	A	T	C	T	T	T	A	A	T	C	A	G	T	G	T	G	T	A	A	C	A	T	T	A	G	G	G	A	G	G	A	C	T	T	G	A	A	A	G	A	G	C	C	A	C
1353	Delta	>125168|29662|29890	C	A	A	T	C	T	T	T	A	A	T	C	A	G	T	G	T	G	T	A	A	C	A	T	T	A	G	G	G	A	G	G	A	C	T	T	G	A	A	A	G	A	G	C	C	A	C
1354	Delta	>125167|29662|29890	C	A	A	T	C	T	T	T	A	A	T	C	A	G	T	G	T	G	T	A	A	C	A	T	T	A	G	G	G	A	G	G	A	C	T	T	G	A	A	A	G	A	G	C	C	A	C
1355	Delta	>125165|29668|29896	C	A	A	T	C	T	T	T	A	A	T	C	A	G	T	G	T	G	T	A	A	C	A	T	T	A	G	G	G	A	G	G	A	C	T	T	G	A	A	A	G	A	G	C	C	A	C
1356	Delta	>125164|29662|29890	C	A	A	T	C	T	T	T	A	A	T	C	A	G	T	G	T	G	T	A	A	C	A	T	T	A	G	G	G	A	G	G	A	C	T	T	G	A	A	A	G	A	G	C	C	A	C
1357	Delta	>125163|29662|29890	C	A	A	T	C	T	T	T	A	A	T	C	A	G	T	G	T	G	T	A	A	C	A	T	T	A	G	G	G	A	G	G	A	C	T	T	G	A	A	A	G	A	G	C	C	A	C
1358	Delta	>125162|29662|29890	C	A	A	T	C	T	T	T	A	A	T	C	A	G	T	G	T	G	T	A	A	C	A	T	T	A	G	G	G	A	G	G	A	C	T	T	G	A	A	A	G	A	G	C	C	A	C
1359	Delta	>125161|29662|29890	C	A	A	T	C	T	T	T	A	A	T	C	A	G	T	G	T	G	T	A	A	C	A	T	T	A	G	G	G	A	G	G	A	C	T	T	G	A	A	A	G	A	G	C	C	A	C
1360	Delta	>125160|29662|29890	C	A	A	T	C	T	T	T	A	A	T	C	A	G	T	G	T	G	T	A	A	C	A	T	T	A	G	G	G	A	G	G	A	C	T	T	G	A	A	A	G	A	G	C	C	A	C
1361	Delta	>125157|29662|29890	C	A	A	T	C	T	T	T	A	A	T	C	A	G	T	G	T	G	T	A	A	C	A	T	T	A	G	G	G	A	G	G	A	C	T	T	G	A	A	A	G	A	G	C	C	A	C
1362	Delta	>125156|29662|29890	C	A	A	T	C	T	T	T	A	A	T	C	A	G	T	G	T	G	T	A	A	C	A	T	T	A	G	G	G	A	G	G	A	C	T	T	G	A	A	A	G	A	G	C	C	A	C
1363	Delta	>125155|29662|29890	C	A	A	T	C	T	T	T	A	A	T	C	A	G	T	G	T	G	T	A	A	C	A	T	T	A	G	G	G	A	G	G	A	C	T	T	G	A	A	A	G	A	G	C	C	A	C
1364	Delta	>125154|29662|29890	C	A	A	T	C	T	T	T	A	A	T	C	A	G	T	G	T	G	T	A	A	C	A	T	T	A	G	G	G	A	G	G	A	C	T	T	G	A	A	A	G	A	G	C	C	A	C
1365	Delta	>125153|29659|29887	C	A	A	T	C	T	T	T	A	A	T	C	A	G	T	G	T	G	T	A	A	C	A	T	T	A	G	G	G	A	G	G	A	C	T	T	G	A	A	A	G	A	G	C	C	A	C
1366	Delta	>125152|29662|29890	C	A	A	T	C	T	T	T	A	A	T	C	A	G	T	G	T	G	T	A	A	C	A	T	T	A	G	G	G	A	G	G	A	C	T	T	G	A	A	A	G	A	G	C	C	A	C
1367	Delta	>125151|29662|29890	C	A	A	T	C	T	T	T	A	A	T	C	A	G	T	G	T	G	T	A	A	C	A	T	T	A	G	G	G	A	G	G	A	C	T	T	G	A	A	A	G	A	G	C	C	A	C
1368	Delta	>125150|29662|29890	C	A	A	T	C	T	T	T	A	A	T	C	A	G	T	G	T	G	T	A	A	C	A	T	T	A	G	G	G	A	G	G	A	C	T	T	G	A	A	A	G	A	G	C	C	A	C
1369	Delta	>125147|29662|29890	C	A	A	T	C	T	T	T	A	A	T	C	A	G	T	G	T	G	T	A	A	C	A	T	T	A	G	G	G	A	G	G	A	C	T	T	G	A	A	A	G	A	G	C	C	A	C
1370	Delta	>125146|29662|29890	C	A	A	T	C	T	T	T	A	A	T	C	A	G	T	G	T	G	T	A	A	C	A	T	T	A	G	G	G	A	G	G	A	C	T	T	G	A	A	A	G	A	G	C	C	A	C
1371	Delta	>125144|29659|29887	C	A	A	T	C	T	T	T	A	A	T	C	A	G	T	G	T	G	T	A	A	C	A	T	T	A	G	G	G	A	G	G	A	C	T	T	G	A	A	A	G	A	G	C	C	A	C
1372	Delta	>125143|29662|29890	C	A	A	T	C	T	T	T	A	A	T	C	A	G	T	G	T	G	T	A	A	C	A	T	T	A	G	G	G	A	G	G	A	C	T	T	G	A	A	A	G	A	G	C	C	A	C
1373	Delta	>125141|29662|29890	C	A	A	T	C	T	T	T	A	A	T	C	A	G	T	G	T	G	T	A	A	C	A	T	T	A	G	G	G	A	G	G	A	C	T	T	G	A	A	A	G	A	G	C	C	A	C
1374	Delta	>125139|29662|29890	C	A	A	T	C	T	T	T	A	A	T	C	A	G	T	G	T	G	T	A	A	C	A	T	T	A	G	G	G	A	G	G	A	C	T	T	G	A	A	A	G	A	G	C	C	A	C
1375	Delta	>125138|29662|29890	C	A	A	T	C	T	T	T	A	A	T	C	A	G	T	G	T	G	T	A	A	C	A	T	T	A	G	G	G	A	G	G	A	C	T	T	G	A	A	A	G	A	G	C	C	A	C
1376	Delta	>125137|29662|29890	C	A	A	T	C	T	T	T	A	A	T	C	A	G	T	G	T	G	T	A	A	C	A	T	T	A	G	G	G	A	G	G	A	C	T	T	G	A	A	A	G	A	G	C	C	A	C
1377	Delta	>125136|29662|29890	C	A	A	T	C	T	T	T	A	A	T	C	A	G	T	G	T	G	T	A	A	C	A	T	T	A	G	G	G	A	G	G	A	C	T	T	G	A	A	A	G	A	G	C	C	A	C
1378	Delta	>125135|29662|29890	C	A	A	T	C	T	T	T	A	A	T	C	A	G	T	G	T	G	T	A	A	C	A	T	T	A	G	G	G	A	G	G	A	C	T	T	G	A	A	A	G	A	G	C	C	A	C
1379	Delta	>125133|29662|29890	C	A	A	T	C	T	T	T	A	A	T	C	A	G	T	G	T	G	T	A	A	C	A	T	T	A	G	G	G	A	G	G	A	C	T	T	G	A	A	A	G	A	G	C	C	A	C
1380	Delta	>125132|29662|29890	C	A	A	T	C	T	T	T	A	A	T	C	A	G	T	G	T	G	T	A	A	C	A	T	T	A	G	G	G	A	G	G	A	C	T	T	G	A	A	A	G	A	G	C	C	A	C
1381	Delta	>125131|29662|29890	C	A	A	T	C	T	T	T	A	A	T	C	A	G	T	G	T	G	T	A	A	C	A	T	T	A	G	G	G	A	G	G	A	C	T	T	G	A	A	A	G	A	G	C	C	A	C
1382	Delta	>125130|29662|29890	C	A	A	T	C	T	T	T	A	A	T	C	A	G	T	G	T	G	T	A	A	C	A	T	T	A	G	G	G	A	G	G	A	C	T	T	G	A	A	A	G	A	G	C	C	A	C
1383	Delta	>125129|29662|29890	C	A	A	T	C	T	T	T	A	A	T	C	A	G	T	G	T	G	T	A	A	C	A	T	T	A	G	G	G	A	G	G	A	C	T	T	G	A	A	A	G	A	G	C	C	A	C
1384	Delta	>125128|29662|29890	C	A	A	T	C	T	T	T	A	A	T	C	A	G	T	G	T	G	T	A	A	C	A	T	T	A	G	G	G	A	G	G	A	C	T	T	G	A	A	A	G	A	G	C	C	A	C
1385	Delta	>125127|29662|29890	C	A	A	T	C	T	T	T	A	A	T	C	A	G	T	G	T	G	T	A	A	C	A	T	T	A	G	G	G	A	G	G	A	C	T	T	G	A	A	A	G	A	G	C	C	A	C
1386	Delta	>125126|29662|29890	C	A	A	T	C	T	T	T	A	A	T	C	A	G	T	G	T	G	T	A	A	C	A	T	T	A	G	G	G	A	G	G	A	C	T	T	G	A	A	A	G	A	G	C	C	A	C
1387	Delta	>125124|29662|29890	C	A	A	T	C	T	T	T	A	A	T	C	A	G	T	G	T	G	T	A	A	C	A	T	T	A	G	G	G	A	G	G	A	C	T	T	G	A	A	A	G	A	G	C	C	A	C
1388	Delta	>125123|29662|29890	C	A	A	T	C	T	T	T	A	A	T	C	A	G	T	G	T	G	T	A	A	C	A	T	T	A	G	G	G	A	G	G	A	C	T	T	G	A	A	A	G	A	G	C	C	A	C
1389	Delta	>125122|29662|29890	C	A	A	T	C	T	T	T	A	A	T	C	A	G	T	G	T	G	T	A	A	C	A	T	T	A	G	G	G	A	G	G	A	C	T	T	G	A	A	A	G	A	G	C	C	A	C
1390	Delta	>125120|29662|29890	C	A	A	T	C	T	T	T	A	A	T	C	A	G	T	G	T	G	T	A	A	C	A	T	T	A	G	G	G	A	G	G	A	C	T	T	G	A	A	A	G	A	G	C	C	A	C
1391	Delta	>125119|29662|29890	C	A	A	T	C	T	T	T	A	A	T	C	A	G	T	G	T	G	T	A	A	C	A	T	T	A	G	G	G	A	G	G	A	C	T	T	G	A	A	A	G	A	G	C	C	A	C
1392	Delta	>125116|29659|29887	C	A	A	T	C	T	T	T	A	A	T	C	A	G	T	G	T	G	T	A	A	C	A	T	T	A	G	G	G	A	G	G	A	C	T	T	G	A	A	A	G	A	G	C	C	A	C
1393	Delta	>125115|29659|29887	C	A	A	T	C	T	T	T	A	A	T	C	A	G	T	G	T	G	T	A	A	C	A	T	T	A	G	G	G	A	G	G	A	C	T	T	G	A	A	A	G	A	G	C	C	A	C
1394	Delta	>125113|29662|29890	C	A	A	T	C	T	T	T	A	A	T	C	A	G	T	G	T	G	T	A	A	C	A	T	T	A	G	G	G	A	G	G	A	C	T	T	G	A	A	A	G	A	G	C	C	A	C
1395	Delta	>125111|29662|29890	C	A	A	T	C	T	T	T	A	A	T	C	A	G	T	G	T	G	T	A	A	C	A	T	T	A	G	G	G	A	G	G	A	C	T	T	G	A	A	A	G	A	G	C	C	A	C
1396	Delta	>125110|29662|29890	C	A	A	T	C	T	T	T	A	A	T	C	A	G	T	G	T	G	T	A	A	C	A	T	T	A	G	G	G	A	G	G	A	C	T	T	G	A	A	A	G	A	G	C	C	A	C
1397	Delta	>125109|29659|29887	C	A	A	T	C	T	T	T	A	A	T	C	A	G	T	G	T	G	T	A	A	C	A	T	T	A	G	G	G	A	G	G	A	C	T	T	G	A	A	A	G	A	G	C	C	A	C
1398	Delta	>125107|29662|29890	C	A	A	T	C	T	T	T	A	A	T	C	A	G	T	G	T	G	T	A	A	C	A	T	T	A	G	G	G	A	G	G	A	C	T	T	G	A	A	A	G	A	G	C	C	A	C
1399	Delta	>125106|29662|29890	C	A	A	T	C	T	T	T	A	A	T	C	A	G	T	G	T	G	T	A	A	C	A	T	T	A	G	G	G	A	G	G	A	C	T	T	G	A	A	A	G	A	G	C	C	A	C
1400	Delta	>125105|29662|29890	C	A	A	T	C	T	T	T	A	A	T	C	A	G	T	G	T	G	T	A	A	C	A	T	T	A	G	G	G	A	G	G	A	C	T	T	G	A	A	A	G	A	G	C	C	A	C
1401	Delta	>125104|29662|29890	C	A	A	T	C	T	T	T	A	A	T	C	A	G	T	G	T	G	T	A	A	C	A	T	T	A	G	G	G	A	G	G	A	C	T	T	G	A	A	A	G	A	G	C	C	A	C
1402	Delta	>125103|29662|29890	C	A	A	T	C	T	T	T	A	A	T	C	A	G	T	G	T	G	T	A	A	C	A	T	T	A	G	G	G	A	G	G	A	C	T	T	G	A	A	A	G	A	G	C	C	A	C
1403	Delta	>125102|29662|29890	C	A	A	T	C	T	T	T	A	A	T	C	A	G	T	G	T	G	T	A	A	C	A	T	T	A	G	G	G	A	G	G	A	C	T	T	G	A	A	A	G	A	G	C	C	A	C
1404	Delta	>125101|29662|29890	C	A	A	T	C	T	T	T	A	A	T	C	A	G	T	G	T	G	T	A	A	C	A	T	T	A	G	G	G	A	G	G	A	C	T	T	G	A	A	A	G	A	G	C	C	A	C
1405	Delta	>125100|29662|29890	C	A	A	T	C	T	T	T	A	A	T	C	A	G	T	G	T	G	T	A	A	C	A	T	T	A	G	G	G	A	G	G	A	C	T	T	G	A	A	A	G	A	G	C	C	A	C
1406	Delta	>125099|29662|29890	C	A	A	T	C	T	T	T	A	A	T	C	A	G	T	G	T	G	T	A	A	C	A	T	T	A	G	G	G	A	G	G	A	C	T	T	G	A	A	A	G	A	G	C	C	A	C
1407	Delta	>125098|29662|29890	C	A	A	T	C	T	T	T	A	A	T	C	A	G	T	G	T	G	T	A	A	C	A	T	T	A	G	G	G	A	G	G	A	C	T	T	G	A	A	A	G	A	G	C	C	A	C
1408	Delta	>125097|29662|29890	C	A	A	T	C	T	T	T	A	A	T	C	A	G	T	G	T	G	T	A	A	C	A	T	T	A	G	G	G	A	G	G	A	C	T	T	G	A	A	A	G	A	G	C	C	A	C
1409	Delta	>125096|29662|29890	C	A	A	T	C	T	T	T	A	A	T	C	A	G	T	G	T	G	T	A	A	C	A	T	T	A	G	G	G	A	G	G	A	C	T	T	G	A	A	A	G	A	G	C	C	A	C
1410	Delta	>125093|29662|29890	C	A	A	T	C	T	T	T	A	A	T	C	A	G	T	G	T	G	T	A	A	C	A	T	T	A	G	G	G	A	G	G	A	C	T	T	G	A	A	A	G	A	G	C	C	A	C
1411	Delta	>125092|29662|29890	C	A	A	T	C	T	T	T	A	A	T	C	A	G	T	G	T	G	T	A	A	C	A	T	T	A	G	G	G	A	G	G	A	C	T	T	G	A	A	A	G	A	G	C	C	A	C
1412	Delta	>125090|29662|29890	C	A	A	T	C	T	T	T	A	A	T	C	A	G	T	G	T	G	T	A	A	C	A	T	T	A	G	G	G	A	G	G	A	C	T	T	G	A	A	A	G	A	G	C	C	A	C
1413	Delta	>125089|29662|29890	C	A	A	T	C	T	T	T	A	A	T	C	A	G	T	G	T	G	T	A	A	C	A	T	T	A	G	G	G	A	G	G	A	C	T	T	G	A	A	A	G	A	G	C	C	A	C
1414	Delta	>125088|29659|29887	C	A	A	T	C	T	T	T	A	A	T	C	A	G	T	G	T	G	T	A	A	C	A	T	T	A	G	G	G	A	G	G	A	C	T	T	G	A	A	A	G	A	G	C	C	A	C
1415	Delta	>125087|29662|29890	C	A	A	T	C	T	T	T	A	A	T	C	A	G	T	G	T	G	T	A	A	C	A	T	T	A	G	G	G	A	G	G	A	C	T	T	G	A	A	A	G	A	G	C	C	A	C
1416	Delta	>125086|29662|29890	C	A	A	T	C	T	T	T	A	A	T	C	A	G	T	G	T	G	T	A	A	C	A	T	T	A	G	G	G	A	G	G	A	C	T	T	G	A	A	A	G	A	G	C	C	A	C
1417	Delta	>125084|29662|29890	C	A	A	T	C	T	T	T	A	A	T	C	A	G	T	G	T	G	T	A	A	C	A	T	T	A	G	G	G	A	G	G	A	C	T	T	G	A	A	A	G	A	G	C	C	A	C
1418	Delta	>125083|29662|29890	C	A	A	T	C	T	T	T	A	A	T	C	A	G	T	G	T	G	T	A	A	C	A	T	T	A	G	G	G	A	G	G	A	C	T	T	G	A	A	A	G	A	G	C	C	A	C
1419	Delta	>125082|29662|29890	C	A	A	T	C	T	T	T	A	A	T	C	A	G	T	G	T	G	T	A	A	C	A	T	T	A	G	G	G	A	G	G	A	C	T	T	G	A	A	A	G	A	G	C	C	A	C
1420	Delta	>125080|29662|29890	C	A	A	T	C	T	T	T	A	A	T	C	A	G	T	G	T	G	T	A	A	C	A	T	T	A	G	G	G	A	G	G	A	C	T	T	G	A	A	A	G	A	G	C	C	A	C
1421	Delta	>125079|29662|29890	C	A	A	T	C	T	T	T	A	A	T	C	A	G	T	G	T	G	T	A	A	C	A	T	T	A	G	G	G	A	G	G	A	C	T	T	G	A	A	A	G	A	G	C	C	A	C
1422	Delta	>125078|29662|29890	C	A	A	T	C	T	T	T	A	A	T	C	A	G	T	G	T	G	T	A	A	C	A	T	T	A	G	G	G	A	G	G	A	C	T	T	G	A	A	A	G	A	G	C	C	A	C
1423	Delta	>125077|29662|29890	C	A	A	T	C	T	T	T	A	A	T	C	A	G	T	G	T	G	T	A	A	C	A	T	T	A	G	G	G	A	G	G	A	C	T	T	G	A	A	A	G	A	G	C	C	A	C
1424	Delta	>125076|29662|29890	C	A	A	T	C	T	T	T	A	A	T	C	A	G	T	G	T	G	T	A	A	C	A	T	T	A	G	G	G	A	G	G	A	C	T	T	G	A	A	A	G	A	G	C	C	A	C
1425	Delta	>125075|29662|29890	C	A	A	T	C	T	T	T	A	A	T	C	A	G	T	G	T	G	T	A	A	C	A	T	T	A	G	G	G	A	G	G	A	C	T	T	G	A	A	A	G	A	G	C	C	A	C
1426	Delta	>125072|29662|29890	C	A	A	T	C	T	T	T	A	A	T	C	A	G	T	G	T	G	T	A	A	C	A	T	T	A	G	G	G	A	G	G	A	C	T	T	G	A	A	A	G	A	G	C	C	A	C
1427	Delta	>125071|29662|29890	C	A	A	T	C	T	T	T	A	A	T	C	A	G	T	G	T	G	T	A	A	C	A	T	T	A	G	G	G	A	G	G	A	C	T	T	G	A	A	A	G	A	G	C	C	A	C
1428	Delta	>125070|29662|29890	C	A	A	T	C	T	T	T	A	A	T	C	A	G	T	G	T	G	T	A	A	C	A	T	T	A	G	G	G	A	G	G	A	C	T	T	G	A	A	A	G	A	G	C	C	A	C
1429	Delta	>125069|29662|29890	C	A	A	T	C	T	T	T	A	A	T	C	A	G	T	G	T	G	T	A	A	C	A	T	T	A	G	G	G	A	G	G	A	C	T	T	G	A	A	A	G	A	G	C	C	A	C
1430	Delta	>125068|29662|29890	C	A	A	T	C	T	T	T	A	A	T	C	A	G	T	G	T	G	T	A	A	C	A	T	T	A	G	G	G	A	G	G	A	C	T	T	G	A	A	A	G	A	G	C	C	A	C
1431	Delta	>125065|29662|29890	C	A	A	T	C	T	T	T	A	A	T	C	A	G	T	G	T	G	T	A	A	C	A	T	T	A	G	G	G	A	G	G	A	C	T	T	G	A	A	A	G	A	G	C	C	A	C
1432	Delta	>125064|29662|29890	C	A	A	T	C	T	T	T	A	A	T	C	A	G	T	G	T	G	T	A	A	C	A	T	T	A	G	G	G	A	G	G	A	C	T	T	G	A	A	A	G	A	G	C	C	A	C
1433	Delta	>125063|29662|29890	C	A	A	T	C	T	T	T	A	A	T	C	A	G	T	G	T	G	T	A	A	C	A	T	T	A	G	G	G	A	G	G	A	C	T	T	G	A	A	A	G	A	G	C	C	A	C
1434	Delta	>125062|29659|29887	C	A	A	T	C	T	T	T	A	A	T	C	A	G	T	G	T	G	T	A	A	C	A	T	T	A	G	G	G	A	G	G	A	C	T	T	G	A	A	A	G	A	G	C	C	A	C
1435	Delta	>125061|29662|29890	C	A	A	T	C	T	T	T	A	A	T	C	A	G	T	G	T	G	T	A	A	C	A	T	T	A	G	G	G	A	G	G	A	C	T	T	G	A	A	A	G	A	G	C	C	A	C
1436	Delta	>125060|29662|29890	C	A	A	T	C	T	T	T	A	A	T	C	A	G	T	G	T	G	T	A	A	C	A	T	T	A	G	G	G	A	G	G	A	C	T	T	G	A	A	A	G	A	G	C	C	A	C
1437	Delta	>125059|29662|29890	C	A	A	T	C	T	T	T	A	A	T	C	A	G	T	G	T	G	T	A	A	C	A	T	T	A	G	G	G	A	G	G	A	C	T	T	G	A	A	A	G	A	G	C	C	A	C
1438	Delta	>125058|29662|29890	C	A	A	T	C	T	T	T	A	A	T	C	A	G	T	G	T	G	T	A	A	C	A	T	T	A	G	G	G	A	G	G	A	C	T	T	G	A	A	A	G	A	G	C	C	A	C
1439	Delta	>125057|29662|29890	C	A	A	T	C	T	T	T	A	A	T	C	A	G	T	G	T	G	T	A	A	C	A	T	T	A	G	G	G	A	G	G	A	C	T	T	G	A	A	A	G	A	G	C	C	A	C
1440	Delta	>125055|29662|29890	C	A	A	T	C	T	T	T	A	A	T	C	A	G	T	G	T	G	T	A	A	C	A	T	T	A	G	G	G	A	G	G	A	C	T	T	G	A	A	A	G	A	G	C	C	A	C
1441	Delta	>125054|29662|29890	C	A	A	T	C	T	T	T	A	A	T	C	A	G	T	G	T	G	T	A	A	C	A	T	T	A	G	G	G	A	G	G	A	C	T	T	G	A	A	A	G	A	G	C	C	A	C
1442	Delta	>125053|29662|29890	C	A	A	T	C	T	T	T	A	A	T	C	A	G	T	G	T	G	T	A	A	C	A	T	T	A	G	G	G	A	G	G	A	C	T	T	G	A	A	A	G	A	G	C	C	A	C
1443	Delta	>125052|29662|29890	C	A	A	T	C	T	T	T	A	A	T	C	A	G	T	G	T	G	T	A	A	C	A	T	T	A	G	G	G	A	G	G	A	C	T	T	G	A	A	A	G	A	G	C	C	A	C
1444	Delta	>125051|29662|29890	C	A	A	T	C	T	T	T	A	A	T	C	A	G	T	G	T	G	T	A	A	C	A	T	T	A	G	G	G	A	G	G	A	C	T	T	G	A	A	A	G	A	G	C	C	A	C
1445	Delta	>125050|29662|29890	C	A	A	T	C	T	T	T	A	A	T	C	A	G	T	G	T	G	T	A	A	C	A	T	T	A	G	G	G	A	G	G	A	C	T	T	G	A	A	A	G	A	G	C	C	A	C
1446	Delta	>125049|29653|29881	C	A	A	T	C	T	T	T	A	A	T	C	A	G	T	G	T	G	T	A	A	C	A	T	T	A	G	G	G	A	G	G	A	C	T	T	G	A	A	A	G	A	G	C	C	A	C
1447	Delta	>125048|29662|29890	C	A	A	T	C	T	T	T	A	A	T	C	A	G	T	G	T	G	T	A	A	C	A	T	T	A	G	G	G	A	G	G	A	C	T	T	G	A	A	A	G	A	G	C	C	A	C
1448	Delta	>125047|29662|29890	C	A	A	T	C	T	T	T	A	A	T	C	A	G	T	G	T	G	T	A	A	C	A	T	T	A	G	G	G	A	G	G	A	C	T	T	G	A	A	A	G	A	G	C	C	A	C
1449	Delta	>125046|29662|29890	C	A	A	T	C	T	T	T	A	A	T	C	A	G	T	G	T	G	T	A	A	C	A	T	T	A	G	G	G	A	G	G	A	C	T	T	G	A	A	A	G	A	G	C	C	A	C
1450	Delta	>125045|29662|29890	C	A	A	T	C	T	T	T	A	A	T	C	A	G	T	G	T	G	T	A	A	C	A	T	T	A	G	G	G	A	G	G	A	C	T	T	G	A	A	A	G	A	G	C	C	A	C
1451	Delta	>125044|29659|29887	C	A	A	T	C	T	T	T	A	A	T	C	A	G	T	G	T	G	T	A	A	C	A	T	T	A	G	G	G	A	G	G	A	C	T	T	G	A	A	A	G	A	G	C	C	A	C
1452	Delta	>125042|29662|29890	C	A	A	T	C	T	T	T	A	A	T	C	A	G	T	G	T	G	T	A	A	C	A	T	T	A	G	G	G	A	G	G	A	C	T	T	G	A	A	A	G	A	G	C	C	A	C
1453	Delta	>125041|29662|29890	C	A	A	T	C	T	T	T	A	A	T	C	A	G	T	G	T	G	T	A	A	C	A	T	T	A	G	G	G	A	G	G	A	C	T	T	G	A	A	A	G	A	G	C	C	A	C
1454	Delta	>125039|29662|29890	C	A	A	T	C	T	T	T	A	A	T	C	A	G	T	G	T	G	T	A	A	C	A	T	T	A	G	G	G	A	G	G	A	C	T	T	G	A	A	A	G	A	G	C	C	A	C
1455	Delta	>125038|29662|29890	C	A	A	T	C	T	T	T	A	A	T	C	A	G	T	G	T	G	T	A	A	C	A	T	T	A	G	G	G	A	G	G	A	C	T	T	G	A	A	A	G	A	G	C	C	A	C
1456	Delta	>125037|29662|29890	C	A	A	T	C	T	T	T	A	A	T	C	A	G	T	G	T	G	T	A	A	C	A	T	T	A	G	G	G	A	G	G	A	C	T	T	G	A	A	A	G	A	G	C	C	A	C
1457	Delta	>125036|29662|29890	C	A	A	T	C	T	T	T	A	A	T	C	A	G	T	G	T	G	T	A	A	C	A	T	T	A	G	G	G	A	G	G	A	C	T	T	G	A	A	A	G	A	G	C	C	A	C
1458	Delta	>125035|29659|29887	C	A	A	T	C	T	T	T	A	A	T	C	A	G	T	G	T	G	T	A	A	C	A	T	T	A	G	G	G	A	G	G	A	C	T	T	G	A	A	A	G	A	G	C	C	A	C
1459	Delta	>125034|29662|29890	C	A	A	T	C	T	T	T	A	A	T	C	A	G	T	G	T	G	T	A	A	C	A	T	T	A	G	G	G	A	G	G	A	C	T	T	G	A	A	A	G	A	G	C	C	A	C
1460	Delta	>125033|29662|29890	C	A	A	T	C	T	T	T	A	A	T	C	A	G	T	G	T	G	T	A	A	C	A	T	T	A	G	G	G	A	G	G	A	C	T	T	G	A	A	A	G	A	G	C	C	A	C
1461	Delta	>125032|29662|29890	C	A	A	T	C	T	T	T	A	A	T	C	A	G	T	G	T	G	T	A	A	C	A	T	T	A	G	G	G	A	G	G	A	C	T	T	G	A	A	A	G	A	G	C	C	A	C
1462	Delta	>124875|29661|29889	C	A	A	T	C	T	T	T	A	A	T	C	A	G	T	G	T	G	T	A	A	C	A	T	T	A	G	G	G	A	G	G	A	C	T	T	G	A	A	A	G	A	G	C	C	A	C
1463	Delta	>124872|29662|29890	C	A	A	T	C	T	T	T	A	A	T	C	A	G	T	G	T	G	T	A	A	C	A	T	T	A	G	G	G	A	G	G	A	C	T	T	G	A	A	A	G	A	G	C	C	A	C
1464	Delta	>124869|29668|29896	C	A	A	T	C	T	T	T	A	A	T	C	A	G	T	G	T	G	T	A	A	C	A	T	T	A	G	G	G	A	G	G	A	C	T	T	G	A	A	A	G	A	G	C	C	A	C
1465	Delta	>124867|29662|29890	C	A	A	T	C	T	T	T	A	A	T	C	A	G	T	G	T	G	T	A	A	C	A	T	T	A	G	G	G	A	G	G	A	C	T	T	G	A	A	A	G	A	G	C	C	A	C
1466	Delta	>124864|29662|29890	C	A	A	T	C	T	T	T	A	A	T	C	A	G	T	G	T	G	T	A	A	C	A	T	T	A	G	G	G	A	G	G	A	C	T	T	G	A	A	A	G	A	G	C	C	A	C
1467	Delta	>124846|29660|29888	C	A	A	T	C	T	T	T	A	A	T	C	A	G	T	G	T	G	T	A	A	C	A	T	T	A	G	G	G	A	G	G	A	C	T	T	G	A	A	A	G	A	G	C	C	A	C
1468	Delta	>124842|29651|29879	C	A	A	T	C	T	T	T	A	A	T	C	A	G	T	G	T	G	T	A	A	C	A	T	T	A	G	G	G	A	G	G	A	C	T	T	G	A	A	A	G	A	G	C	C	A	C
1469	Delta	>124841|29662|29890	C	A	A	T	C	T	T	T	A	A	T	C	A	G	T	G	T	G	T	A	A	C	A	T	T	A	G	G	G	A	G	G	A	C	T	T	G	A	A	A	G	A	G	C	C	A	C
1470	Delta	>124834|29656|29884	C	A	A	T	C	T	T	T	A	A	T	C	A	G	T	G	T	G	T	A	A	C	A	T	T	A	G	G	G	A	G	G	A	C	T	T	G	A	A	A	G	A	G	C	C	A	C
1471	Delta	>124782|29662|29890	C	A	A	T	C	T	T	T	A	A	T	C	A	G	T	G	T	G	T	A	A	C	A	T	T	A	G	G	G	A	G	G	A	C	T	T	G	A	A	A	G	A	G	C	C	A	C
1472	Delta	>124781|29662|29890	C	A	A	T	C	T	T	T	A	A	T	C	A	G	T	G	T	G	T	A	A	C	A	T	T	A	G	G	G	A	G	G	A	C	T	T	G	A	A	A	G	A	G	C	C	A	C
1473	Delta	>124779|29662|29890	C	A	A	T	C	T	T	T	A	A	T	C	A	G	T	G	T	G	T	A	A	C	A	T	T	A	G	G	G	A	G	G	A	C	T	T	G	A	A	A	G	A	G	C	C	A	C
1474	Delta	>124778|29662|29890	C	A	A	T	C	T	T	T	A	A	T	C	A	G	T	G	T	G	T	A	A	C	A	T	T	A	G	G	G	A	G	G	A	C	T	T	G	A	A	A	G	A	G	C	C	A	C
1475	Delta	>124777|29662|29890	C	A	A	T	C	T	T	T	A	A	T	C	A	G	T	G	T	G	T	A	A	C	A	T	T	A	G	G	G	A	G	G	A	C	T	T	G	A	A	A	G	A	G	C	C	A	C
1476	Delta	>124776|29661|29889	C	A	A	T	C	T	T	T	A	A	T	C	A	G	T	G	T	G	T	A	A	C	A	T	T	A	G	G	G	A	G	G	A	C	T	T	G	A	A	A	G	A	G	C	C	A	C
1477	Delta	>124775|29659|29887	C	A	A	T	C	T	T	T	A	A	T	C	A	G	T	G	T	G	T	A	A	C	A	T	T	A	G	G	G	A	G	G	A	C	T	T	G	A	A	A	G	A	G	C	C	A	C
1478	Delta	>124772|29660|29888	C	A	A	T	C	T	T	T	A	A	T	C	A	G	T	G	T	G	T	A	A	C	A	T	T	A	G	G	G	A	G	G	A	C	T	T	G	A	A	A	G	A	G	C	C	A	C
1479	Delta	>124770|29662|29890	C	A	A	T	C	T	T	T	A	A	T	C	A	G	T	G	T	G	T	A	A	C	A	T	T	A	G	G	G	A	G	G	A	C	T	T	G	A	A	A	G	A	G	C	C	A	C
1480	Delta	>124764|29656|29884	C	A	A	T	C	T	T	T	A	A	T	C	A	G	T	G	T	G	T	A	A	C	A	T	T	A	G	G	G	A	G	G	A	C	T	T	G	A	A	A	G	A	G	C	C	A	C
1481	Delta	>124350|29658|29886	C	A	A	T	C	T	T	T	A	A	T	C	A	G	T	G	T	G	T	A	A	C	A	T	T	A	G	G	G	A	G	G	A	C	T	T	G	A	A	A	G	A	G	C	C	A	C
1482	Delta	>124349|29656|29884	C	A	A	T	C	T	T	T	A	A	T	C	A	G	T	G	T	G	T	A	A	C	A	T	T	A	G	G	G	A	G	G	A	C	T	T	G	A	A	A	G	A	G	C	C	A	C
1483	Delta	>124294|29626|29854	C	A	A	T	C	T	T	T	A	A	T	C	A	G	T	G	T	G	T	A	A	C	A	T	T	A	G	G	G	A	G	G	A	C	T	T	G	A	A	A	G	A	G	C	C	A	C
1484	Delta	>123945|29650|29878	C	A	A	T	C	T	T	T	A	A	T	C	A	G	T	G	T	G	T	A	A	C	A	T	T	A	G	G	G	A	G	G	A	C	T	T	G	A	A	A	G	A	G	C	C	A	C
1485	Delta	>123914|29665|29893	C	A	A	T	C	T	T	T	A	A	T	C	A	G	T	G	T	G	T	A	A	C	A	T	T	A	G	G	G	A	G	G	A	C	T	T	G	A	A	A	G	A	G	C	C	A	C
1486	Delta	>123838|29662|29890	C	A	A	T	C	T	T	T	A	A	T	C	A	G	T	G	T	G	T	A	A	C	A	T	T	A	G	G	G	A	G	G	A	C	T	T	G	A	A	A	G	A	G	C	C	A	C
1487	Delta	>122791|29631|29859	C	A	A	T	C	T	T	T	A	A	T	C	A	G	T	G	T	G	T	A	A	C	A	T	T	A	G	G	G	A	G	G	A	C	T	T	G	A	A	A	G	A	G	C	C	A	C
1488	Delta	>122790|29628|29856	C	A	A	T	C	T	T	T	A	A	T	C	A	G	T	G	T	G	T	A	A	C	A	T	T	A	G	G	G	A	G	G	A	C	T	T	G	A	A	A	G	A	G	C	C	A	C
1489	Delta	>122788|29646|29874	C	A	A	T	C	T	T	T	A	A	T	C	A	G	T	G	T	G	T	A	A	C	A	T	T	A	G	G	G	A	G	G	A	C	T	T	G	A	A	A	G	A	G	C	C	A	C
1490	Delta	>122778|29632|29860	C	A	A	T	C	T	T	T	A	A	T	C	A	G	T	G	T	G	T	A	A	C	A	T	T	A	G	G	G	A	G	G	A	C	T	T	G	A	A	A	G	A	G	C	C	A	C
1491	Delta	>122773|29631|29859	C	A	A	T	C	T	T	T	A	A	T	C	A	G	T	G	T	G	T	A	A	C	A	T	T	A	G	G	G	A	G	G	A	C	T	T	G	A	A	A	G	A	G	C	C	A	C
1492	Delta	>122771|29630|29858	C	A	A	T	C	T	T	T	A	A	T	C	A	G	T	G	T	G	T	A	A	C	A	T	T	A	G	G	G	A	G	G	A	C	T	T	G	A	A	A	G	A	G	C	C	A	C
1493	Delta	>122769|29636|29864	C	A	A	T	C	T	T	T	A	A	T	C	A	G	T	G	T	G	T	A	A	C	A	T	T	A	G	G	G	A	G	G	A	C	T	T	G	A	A	A	G	A	G	C	C	A	C
1494	Delta	>122442|29630|29858	C	A	A	T	C	T	T	T	A	A	T	C	A	G	T	G	T	G	T	A	A	C	A	T	T	A	G	G	G	A	G	G	A	C	T	T	G	A	A	A	G	A	G	C	C	A	C
1495	Delta	>122426|29631|29859	C	A	A	T	C	T	T	T	A	A	T	C	A	G	T	G	T	G	T	A	A	C	A	T	T	A	G	G	G	A	G	G	A	C	T	T	G	A	A	A	G	A	G	C	C	A	C
1496	Delta	>122408|29631|29859	C	A	A	T	C	T	T	T	A	A	T	C	A	G	T	G	T	G	T	A	A	C	A	T	T	A	G	G	G	A	G	G	A	C	T	T	G	A	A	A	G	A	G	C	C	A	C
1497	Delta	>122383|29633|29861	C	A	A	T	C	T	T	T	A	A	T	C	A	G	T	G	T	G	T	A	A	C	A	T	T	A	G	G	G	A	G	G	A	C	T	T	G	A	A	A	G	A	G	C	C	A	C
1498	Delta	>122382|29631|29859	C	A	A	T	C	T	T	T	A	A	T	C	A	G	T	G	T	G	T	A	A	C	A	T	T	A	G	G	G	A	G	G	A	C	T	T	G	A	A	A	G	A	G	C	C	A	C
1499	Delta	>122368|29630|29858	C	A	A	T	C	T	T	T	A	A	T	C	A	G	T	G	T	G	T	A	A	C	A	T	T	A	G	G	G	A	G	G	A	C	T	T	G	A	A	A	G	A	G	C	C	A	C
1500	Delta	>122304|29636|29864	C	A	A	T	C	T	T	T	A	A	T	C	A	G	T	G	T	G	T	A	A	C	A	T	T	A	G	G	G	A	G	G	A	C	T	T	G	A	A	A	G	A	G	C	C	A	C
1501	Delta	>122012|29629|29857	C	A	A	T	C	T	T	T	A	A	T	C	A	G	T	G	T	G	T	A	A	C	A	T	T	A	G	G	G	A	G	G	A	C	T	T	G	A	A	A	G	A	G	C	C	A	C
1502	Delta	>122009|29624|29852	C	A	A	T	C	T	T	T	A	A	T	C	A	G	T	G	T	G	T	A	A	C	A	T	T	A	G	G	G	A	G	G	A	C	T	T	G	A	A	A	G	A	G	C	C	A	C
1503	Delta	>121787|29632|29860	C	A	A	T	C	T	T	T	A	A	T	C	A	G	T	G	T	G	T	A	A	C	A	T	T	A	G	G	G	A	G	G	A	C	T	T	G	A	A	A	G	A	G	C	C	A	C
1504	Delta	>121786|29660|29888	C	A	A	T	C	T	T	T	A	A	T	C	A	G	T	G	T	G	T	A	A	C	A	T	T	A	G	G	G	A	G	G	A	C	T	T	G	A	A	A	G	A	G	C	C	A	C
1505	Delta	>121643|29656|29884	C	A	A	T	C	T	T	T	A	A	T	C	A	G	T	G	T	G	T	A	A	C	A	T	T	A	G	G	G	A	G	G	A	C	T	T	G	A	A	A	G	A	G	C	C	A	C
1506	Delta	>121618|29659|29887	C	A	A	T	C	T	T	T	A	A	T	C	A	G	T	G	T	G	T	A	A	C	A	T	T	A	G	G	G	A	G	G	A	C	T	T	G	A	A	A	G	A	G	C	C	A	C
1507	Delta	>121524|29660|29888	C	A	A	T	C	T	T	T	A	A	T	C	A	G	T	G	T	G	T	A	A	C	A	T	T	A	G	G	G	A	G	G	A	C	T	T	G	A	A	A	G	A	G	C	C	A	C
1508	Delta	>121438|29625|29853	C	A	A	T	C	T	T	T	A	A	T	C	A	G	T	G	T	G	T	A	A	C	A	T	T	A	G	G	G	A	G	G	A	C	T	T	G	A	A	A	G	A	G	C	C	A	C
1509	Delta	>121354|29626|29854	C	A	A	T	C	T	T	T	A	A	T	C	A	G	T	G	T	G	T	A	A	C	A	T	T	A	G	G	G	A	G	G	A	C	T	T	G	A	A	A	G	A	G	C	C	A	C
1510	Delta	>121336|29646|29874	C	A	A	T	C	T	T	T	A	A	T	C	A	G	T	G	T	G	T	A	A	C	A	T	T	A	G	G	G	A	G	G	A	C	T	T	G	A	A	A	G	A	G	C	C	A	C
1511	Delta	>121334|29658|29886	C	A	A	T	C	T	T	T	A	A	T	C	A	G	T	G	T	G	T	A	A	C	A	T	T	A	G	G	G	A	G	G	A	C	T	T	G	A	A	A	G	A	G	C	C	A	C
1512	Delta	>121331|29660|29888	C	A	A	T	C	T	T	T	A	A	T	C	A	G	T	G	T	G	T	A	A	C	A	T	T	A	G	G	G	A	G	G	A	C	T	T	G	A	A	A	G	A	G	C	C	A	C
1513	Delta	>121328|29660|29888	C	A	A	T	C	T	T	T	A	A	T	C	A	G	T	G	T	G	T	A	A	C	A	T	T	A	G	G	G	A	G	G	A	C	T	T	G	A	A	A	G	A	G	C	C	A	C
1514	Delta	>121326|29660|29888	C	A	A	T	C	T	T	T	A	A	T	C	A	G	T	G	T	G	T	A	A	C	A	T	T	A	G	G	G	A	G	G	A	C	T	T	G	A	A	A	G	A	G	C	C	A	C
1515	Delta	>120336|29639|29867	C	A	A	T	C	T	T	T	A	A	T	C	A	G	T	G	T	G	T	A	A	C	A	T	T	A	G	G	G	A	G	G	A	C	T	T	G	A	A	A	G	A	G	C	C	A	C
1516	Delta	>119745|29661|29889	C	A	A	T	C	T	T	T	A	A	T	C	A	G	T	G	T	G	T	A	A	C	A	T	T	A	G	G	G	A	G	G	A	C	T	T	G	A	A	A	G	A	G	C	C	A	C
1517	Delta	>119646|29631|29859	C	A	A	T	C	T	T	T	A	A	T	C	A	G	T	G	T	G	T	A	A	C	A	T	T	A	G	G	G	A	G	G	A	C	T	T	G	A	A	A	G	A	G	C	C	A	C
1518	Delta	>119642|29631|29859	C	A	A	T	C	T	T	T	A	A	T	C	A	G	T	G	T	G	T	A	A	C	A	T	T	A	G	G	G	A	G	G	A	C	T	T	G	A	A	A	G	A	G	C	C	A	C
1519	Delta	>119641|29628|29856	C	A	A	T	C	T	T	T	A	A	T	C	A	G	T	G	T	G	T	A	A	C	A	T	T	A	G	G	G	A	G	G	A	C	T	T	G	A	A	A	G	A	G	C	C	A	C
1520	Delta	>119550|29662|29890	C	A	A	T	C	T	T	T	A	A	T	C	A	G	T	G	T	G	T	A	A	C	A	T	T	A	G	G	G	A	G	G	A	C	T	T	G	A	A	A	G	A	G	C	C	A	C
1521	Delta	>119539|29662|29890	C	A	A	T	C	T	T	T	A	A	T	C	A	G	T	G	T	G	T	A	A	C	A	T	T	A	G	G	G	A	G	G	A	C	T	T	G	A	A	A	G	A	G	C	C	A	C
1522	Delta	>119526|29651|29879	C	A	A	T	C	T	T	T	A	A	T	C	A	G	T	G	T	G	T	A	A	C	A	T	T	A	G	G	G	A	G	G	A	C	T	T	G	A	A	A	G	A	G	C	C	A	C
1523	Delta	>119525|29659|29887	C	A	A	T	C	T	T	T	A	A	T	C	A	G	T	G	T	G	T	A	A	C	A	T	T	A	G	G	G	A	G	G	A	C	T	T	G	A	A	A	G	A	G	C	C	A	C
1524	Delta	>119522|29628|29856	C	A	A	T	C	T	T	T	A	A	T	C	A	G	T	G	T	G	T	A	A	C	A	T	T	A	G	G	G	A	G	G	A	C	T	T	G	A	A	A	G	A	G	C	C	A	C
1525	Delta	>119242|29661|29889	C	A	A	T	C	T	T	T	A	A	T	C	A	G	T	G	T	G	T	A	A	C	A	T	T	A	G	G	G	A	G	G	A	C	T	T	G	A	A	A	G	A	G	C	C	A	C
1526	Delta	>119239|29660|29888	C	A	A	T	C	T	T	T	A	A	T	C	A	G	T	G	T	G	T	A	A	C	A	T	T	A	G	G	G	A	G	G	A	C	T	T	G	A	A	A	G	A	G	C	C	A	C
1527	Delta	>119233|29660|29888	C	A	A	T	C	T	T	T	A	A	T	C	A	G	T	G	T	G	T	A	A	C	A	T	T	A	G	G	G	A	G	G	A	C	T	T	G	A	A	A	G	A	G	C	C	A	C
1528	Delta	>119200|29628|29856	C	A	A	T	C	T	T	T	A	A	T	C	A	G	T	G	T	G	T	A	A	C	A	T	T	A	G	G	G	A	G	G	A	C	T	T	G	A	A	A	G	A	G	C	C	A	C
1529	Delta	>119199|29617|29845	C	A	A	T	C	T	T	T	A	A	T	C	A	G	T	G	T	G	T	A	A	C	A	T	T	A	G	G	G	A	G	G	A	C	T	T	G	A	A	A	G	A	G	C	C	A	C
1530	Delta	>119058|29630|29858	C	A	A	T	C	T	T	T	A	A	T	C	A	G	T	G	T	G	T	A	A	C	A	T	T	A	G	G	G	A	G	G	A	C	T	T	G	A	A	A	G	A	G	C	C	A	C
1531	Delta	>119057|29628|29856	C	A	A	T	C	T	T	T	A	A	T	C	A	G	T	G	T	G	T	A	A	C	A	T	T	A	G	G	G	A	G	G	A	C	T	T	G	A	A	A	G	A	G	C	C	A	C
1532	Delta	>119056|29628|29856	C	A	A	T	C	T	T	T	A	A	T	C	A	G	T	G	T	G	T	A	A	C	A	T	T	A	G	G	G	A	G	G	A	C	T	T	G	A	A	A	G	A	G	C	C	A	C
1533	Delta	>119055|29629|29857	C	A	A	T	C	T	T	T	A	A	T	C	A	G	T	G	T	G	T	A	A	C	A	T	T	A	G	G	G	A	G	G	A	C	T	T	G	A	A	A	G	A	G	C	C	A	C
1534	Delta	>119054|29628|29856	C	A	A	T	C	T	T	T	A	A	T	C	A	G	T	G	T	G	T	A	A	C	A	T	T	A	G	G	G	A	G	G	A	C	T	T	G	A	A	A	G	A	G	C	C	A	C
1535	Delta	>119052|29628|29856	C	A	A	T	C	T	T	T	A	A	T	C	A	G	T	G	T	G	T	A	A	C	A	T	T	A	G	G	G	A	G	G	A	C	T	T	G	A	A	A	G	A	G	C	C	A	C
1536	Delta	>119051|29629|29857	C	A	A	T	C	T	T	T	A	A	T	C	A	G	T	G	T	G	T	A	A	C	A	T	T	A	G	G	G	A	G	G	A	C	T	T	G	A	A	A	G	A	G	C	C	A	C
1537	Delta	>119050|29631|29859	C	A	A	T	C	T	T	T	A	A	T	C	A	G	T	G	T	G	T	A	A	C	A	T	T	A	G	G	G	A	G	G	A	C	T	T	G	A	A	A	G	A	G	C	C	A	C
1538	Delta	>119049|29628|29856	C	A	A	T	C	T	T	T	A	A	T	C	A	G	T	G	T	G	T	A	A	C	A	T	T	A	G	G	G	A	G	G	A	C	T	T	G	A	A	A	G	A	G	C	C	A	C
1539	Delta	>119048|29623|29851	C	A	A	T	C	T	T	T	A	A	T	C	A	G	T	G	T	G	T	A	A	C	A	T	T	A	G	G	G	A	G	G	A	C	T	T	G	A	A	A	G	A	G	C	C	A	C
1540	Delta	>119047|29636|29864	C	A	A	T	C	T	T	T	A	A	T	C	A	G	T	G	T	G	T	A	A	C	A	T	T	A	G	G	G	A	G	G	A	C	T	T	G	A	A	A	G	A	G	C	C	A	C
1541	Delta	>119046|29629|29857	C	A	A	T	C	T	T	T	A	A	T	C	A	G	T	G	T	G	T	A	A	C	A	T	T	A	G	G	G	A	G	G	A	C	T	T	G	A	A	A	G	A	G	C	C	A	C
1542	Delta	>119045|29631|29859	C	A	A	T	C	T	T	T	A	A	T	C	A	G	T	G	T	G	T	A	A	C	A	T	T	A	G	G	G	A	G	G	A	C	T	T	G	A	A	A	G	A	G	C	C	A	C
1543	Delta	>119044|29631|29859	C	A	A	T	C	T	T	T	A	A	T	C	A	G	T	G	T	G	T	A	A	C	A	T	T	A	G	G	G	A	G	G	A	C	T	T	G	A	A	A	G	A	G	C	C	A	C
1544	Delta	>119043|29631|29859	C	A	A	T	C	T	T	T	A	A	T	C	A	G	T	G	T	G	T	A	A	C	A	T	T	A	G	G	G	A	G	G	A	C	T	T	G	A	A	A	G	A	G	C	C	A	C
1545	Delta	>119042|29629|29857	C	A	A	T	C	T	T	T	A	A	T	C	A	G	T	G	T	G	T	A	A	C	A	T	T	A	G	G	G	A	G	G	A	C	T	T	G	A	A	A	G	A	G	C	C	A	C
1546	Delta	>119041|29630|29858	C	A	A	T	C	T	T	T	A	A	T	C	A	G	T	G	T	G	T	A	A	C	A	T	T	A	G	G	G	A	G	G	A	C	T	T	G	A	A	A	G	A	G	C	C	A	C
1547	Delta	>119007|29660|29888	C	A	A	T	C	T	T	T	A	A	T	C	A	G	T	G	T	G	T	A	A	C	A	T	T	A	G	G	G	A	G	G	A	C	T	T	G	A	A	A	G	A	G	C	C	A	C
1548	Delta	>118996|29660|29888	C	A	A	T	C	T	T	T	A	A	T	C	A	G	T	G	T	G	T	A	A	C	A	T	T	A	G	G	G	A	G	G	A	C	T	T	G	A	A	A	G	A	G	C	C	A	C
1549	Delta	>118981|29662|29890	C	A	A	T	C	T	T	T	A	A	T	C	A	G	T	G	T	G	T	A	A	C	A	T	T	A	G	G	G	A	G	G	A	C	T	T	G	A	A	A	G	A	G	C	C	A	C
1550	Delta	>118978|29661|29889	C	A	A	T	C	T	T	T	A	A	T	C	A	G	T	G	T	G	T	A	A	C	A	T	T	A	G	G	G	A	G	G	A	C	T	T	G	A	A	A	G	A	G	C	C	A	C
1551	Delta	>118977|29661|29889	C	A	A	T	C	T	T	T	A	A	T	C	A	G	T	G	T	G	T	A	A	C	A	T	T	A	G	G	G	A	G	G	A	C	T	T	G	A	A	A	G	A	G	C	C	A	C
1552	Delta	>118975|29661|29889	C	A	A	T	C	T	T	T	A	A	T	C	A	G	T	G	T	G	T	A	A	C	A	T	T	A	G	G	G	A	G	G	A	C	T	T	G	A	A	A	G	A	G	C	C	A	C
1553	Delta	>118972|29653|29881	C	A	A	T	C	T	T	T	A	A	T	C	A	G	T	G	T	G	T	A	A	C	A	T	T	A	G	G	G	A	G	G	A	C	T	T	G	A	A	A	G	A	G	C	C	A	C
1554	Delta	>118960|29661|29889	C	A	A	T	C	T	T	T	A	A	T	C	A	G	T	G	T	G	T	A	A	C	A	T	T	A	G	G	G	A	G	G	A	C	T	T	G	A	A	A	G	A	G	C	C	A	C
1555	Delta	>118955|29645|29873	C	A	A	T	C	T	T	T	A	A	T	C	A	G	T	G	T	G	T	A	A	C	A	T	T	A	G	G	G	A	G	G	A	C	T	T	G	A	A	A	G	A	G	C	C	A	C
1556	Delta	>118667|29660|29888	C	A	A	T	C	T	T	T	A	A	T	C	A	G	T	G	T	G	T	A	A	C	A	T	T	A	G	G	G	A	G	G	A	C	T	T	G	A	A	A	G	A	G	C	C	A	C
1557	Delta	>118585|29661|29889	C	A	A	T	C	T	T	T	A	A	T	C	A	G	T	G	T	G	T	A	A	C	A	T	T	A	G	G	G	A	G	G	A	C	T	T	G	A	A	A	G	A	G	C	C	A	C
1558	Delta	>118578|29658|29886	C	A	A	T	C	T	T	T	A	A	T	C	A	G	T	G	T	G	T	A	A	C	A	T	T	A	G	G	G	A	G	G	A	C	T	T	G	A	A	A	G	A	G	C	C	A	C
1559	Delta	>118571|29639|29867	C	A	A	T	C	T	T	T	A	A	T	C	A	G	T	G	T	G	T	A	A	C	A	T	T	A	G	G	G	A	G	G	A	C	T	T	G	A	A	A	G	A	G	C	C	A	C
1560	Delta	>118570|29630|29858	C	A	A	T	C	T	T	T	A	A	T	C	A	G	T	G	T	G	T	A	A	C	A	T	T	A	G	G	G	A	G	G	A	C	T	T	G	A	A	A	G	A	G	C	C	A	C
1561	Delta	>118569|29630|29858	C	A	A	T	C	T	T	T	A	A	T	C	A	G	T	G	T	G	T	A	A	C	A	T	T	A	G	G	G	A	G	G	A	C	T	T	G	A	A	A	G	A	G	C	C	A	C
1562	Delta	>118439|29631|29859	C	A	A	T	C	T	T	T	A	A	T	C	A	G	T	G	T	G	T	A	A	C	A	T	T	A	G	G	G	A	G	G	A	C	T	T	G	A	A	A	G	A	G	C	C	A	C
1563	Delta	>118406|29660|29888	C	A	A	T	C	T	T	T	A	A	T	C	A	G	T	G	T	G	T	A	A	C	A	T	T	A	G	G	G	A	G	G	A	C	T	T	G	A	A	A	G	A	G	C	C	A	C
1564	Delta	>118404|29661|29889	C	A	A	T	C	T	T	T	A	A	T	C	A	G	T	G	T	G	T	A	A	C	A	T	T	A	G	G	G	A	G	G	A	C	T	T	G	A	A	A	G	A	G	C	C	A	C
1565	Delta	>118317|29646|29874	C	A	A	T	C	T	T	T	A	A	T	C	A	G	T	G	T	G	T	A	A	C	A	T	T	A	G	G	G	A	G	G	A	C	T	T	G	A	A	A	G	A	G	C	C	A	C
1566	Delta	>118246|29629|29857	C	A	A	T	C	T	T	T	A	A	T	C	A	G	T	G	T	G	T	A	A	C	A	T	T	A	G	G	G	A	G	G	A	C	T	T	G	A	A	A	G	A	G	C	C	A	C
1567	Delta	>118133|29660|29888	C	A	A	T	C	T	T	T	A	A	T	C	A	G	T	G	T	G	T	A	A	C	A	T	T	A	G	G	G	A	G	G	A	C	T	T	G	A	A	A	G	A	G	C	C	A	C
1568	Delta	>118103|29661|29889	C	A	A	T	C	T	T	T	A	A	T	C	A	G	T	G	T	G	T	A	A	C	A	T	T	A	G	G	G	A	G	G	A	C	T	T	G	A	A	A	G	A	G	C	C	A	C
1569	Delta	>118101|29645|29873	C	A	A	T	C	T	T	T	A	A	T	C	A	G	T	G	T	G	T	A	A	C	A	T	T	A	G	G	G	A	G	G	A	C	T	T	G	A	A	A	G	A	G	C	C	A	C
1570	Delta	>117614|29645|29873	C	A	A	T	C	T	T	T	A	A	T	C	A	G	T	G	T	G	T	A	A	C	A	T	T	A	G	G	G	A	G	G	A	C	T	T	G	A	A	A	G	A	G	C	C	A	C
1571	Delta	>117415|29658|29886	C	A	A	T	C	T	T	T	A	A	T	C	A	G	T	G	T	G	T	A	A	C	A	T	T	A	G	G	G	A	G	G	A	C	T	T	G	A	A	A	G	A	G	C	C	A	C
1572	Delta	>117400|29660|29888	C	A	A	T	C	T	T	T	A	A	T	C	A	G	T	G	T	G	T	A	A	C	A	T	T	A	G	G	G	A	G	G	A	C	T	T	G	A	A	A	G	A	G	C	C	A	C
1573	Delta	>117386|29658|29886	C	A	A	T	C	T	T	T	A	A	T	C	A	G	T	G	T	G	T	A	A	C	A	T	T	A	G	G	G	A	G	G	A	C	T	T	G	A	A	A	G	A	G	C	C	A	C
1574	Delta	>117141|29641|29869	C	A	A	T	C	T	T	T	A	A	T	C	A	G	T	G	T	G	T	A	A	C	A	T	T	A	G	G	G	A	G	G	A	C	T	T	G	A	A	A	G	A	G	C	C	A	C
1575	Delta	>117139|29641|29869	C	A	A	T	C	T	T	T	A	A	T	C	A	G	T	G	T	G	T	A	A	C	A	T	T	A	G	G	G	A	G	G	A	C	T	T	G	A	A	A	G	A	G	C	C	A	C
1576	Delta	>117137|29652|29880	C	A	A	T	C	T	T	T	A	A	T	C	A	G	T	G	T	G	T	A	A	C	A	T	T	A	G	G	G	A	G	G	A	C	T	T	G	A	A	A	G	A	G	C	C	A	C
1577	Delta	>117135|29658|29886	C	A	A	T	C	T	T	T	A	A	T	C	A	G	T	G	T	G	T	A	A	C	A	T	T	A	G	G	G	A	G	G	A	C	T	T	G	A	A	A	G	A	G	C	C	A	C
1578	Delta	>117134|29645|29873	C	A	A	T	C	T	T	T	A	A	T	C	A	G	T	G	T	G	T	A	A	C	A	T	T	A	G	G	G	A	G	G	A	C	T	T	G	A	A	A	G	A	G	C	C	A	C
1579	Delta	>116685|29656|29884	C	A	A	T	C	T	T	T	A	A	T	C	A	G	T	G	T	G	T	A	A	C	A	T	T	A	G	G	G	A	G	G	A	C	T	T	G	A	A	A	G	A	G	C	C	A	C
1580	Delta	>116683|29659|29887	C	A	A	T	C	T	T	T	A	A	T	C	A	G	T	G	T	G	T	A	A	C	A	T	T	A	G	G	G	A	G	G	A	C	T	T	G	A	A	A	G	A	G	C	C	A	C
1581	Delta	>116682|29660|29888	C	A	A	T	C	T	T	T	A	A	T	C	A	G	T	G	T	G	T	A	A	C	A	T	T	A	G	G	G	A	G	G	A	C	T	T	G	A	A	A	G	A	G	C	C	A	C
1582	Delta	>116675|29662|29890	C	A	A	T	C	T	T	T	A	A	T	C	A	G	T	G	T	G	T	A	A	C	A	T	T	A	G	G	G	A	G	G	A	C	T	T	G	A	A	A	G	A	G	C	C	A	C
1583	Delta	>116667|29658|29886	C	A	A	T	C	T	T	T	A	A	T	C	A	G	T	G	T	G	T	A	A	C	A	T	T	A	G	G	G	A	G	G	A	C	T	T	G	A	A	A	G	A	G	C	C	A	C
1584	Delta	>116289|29660|29888	C	A	A	T	C	T	T	T	A	A	T	C	A	G	T	G	T	G	T	A	A	C	A	T	T	A	G	G	G	A	G	G	A	C	T	T	G	A	A	A	G	A	G	C	C	A	C
1585	Delta	>116286|29660|29888	C	A	A	T	C	T	T	T	A	A	T	C	A	G	T	G	T	G	T	A	A	C	A	T	T	A	G	G	G	A	G	G	A	C	T	T	G	A	A	A	G	A	G	C	C	A	C
1586	Delta	>116279|29660|29888	C	A	A	T	C	T	T	T	A	A	T	C	A	G	T	G	T	G	T	A	A	C	A	T	T	A	G	G	G	A	G	G	A	C	T	T	G	A	A	A	G	A	G	C	C	A	C
1587	Delta	>116274|29660|29888	C	A	A	T	C	T	T	T	A	A	T	C	A	G	T	G	T	G	T	A	A	C	A	T	T	A	G	G	G	A	G	G	A	C	T	T	G	A	A	A	G	A	G	C	C	A	C
1588	Delta	>116238|29660|29888	C	A	A	T	C	T	T	T	A	A	T	C	A	G	T	G	T	G	T	A	A	C	A	T	T	A	G	G	G	A	G	G	A	C	T	T	G	A	A	A	G	A	G	C	C	A	C
1589	Delta	>116234|29658|29886	C	A	A	T	C	T	T	T	A	A	T	C	A	G	T	G	T	G	T	A	A	C	A	T	T	A	G	G	G	A	G	G	A	C	T	T	G	A	A	A	G	A	G	C	C	A	C
1590	Delta	>116171|29660|29888	C	A	A	T	C	T	T	T	A	A	T	C	A	G	T	G	T	G	T	A	A	C	A	T	T	A	G	G	G	A	G	G	A	C	T	T	G	A	A	A	G	A	G	C	C	A	C
1591	Delta	>116170|29658|29886	C	A	A	T	C	T	T	T	A	A	T	C	A	G	T	G	T	G	T	A	A	C	A	T	T	A	G	G	G	A	G	G	A	C	T	T	G	A	A	A	G	A	G	C	C	A	C
1592	Delta	>116169|29660|29888	C	A	A	T	C	T	T	T	A	A	T	C	A	G	T	G	T	G	T	A	A	C	A	T	T	A	G	G	G	A	G	G	A	C	T	T	G	A	A	A	G	A	G	C	C	A	C
1593	Delta	>115659|29669|29897	C	A	A	T	C	T	T	T	A	A	T	C	A	G	T	G	T	G	T	A	A	C	A	T	T	A	G	G	G	A	G	G	A	C	T	T	G	A	A	A	G	A	G	C	C	A	C
1594	Delta	>115652|29667|29895	C	A	A	T	C	T	T	T	A	A	T	C	A	G	T	G	T	G	T	A	A	C	A	T	T	A	G	G	G	A	G	G	A	C	T	T	G	A	A	A	G	A	G	C	C	A	C
1595	Delta	>115651|29667|29895	C	A	A	T	C	T	T	T	A	A	T	C	A	G	T	G	T	G	T	A	A	C	A	T	T	A	G	G	G	A	G	G	A	C	T	T	G	A	A	A	G	A	G	C	C	A	C
1596	Delta	>115649|29607|29835	C	A	A	T	C	T	T	T	A	A	T	C	A	G	T	G	T	G	T	A	A	C	A	T	T	A	G	G	G	A	G	G	A	C	T	T	G	A	A	A	G	A	G	C	C	A	C
1597	Delta	>115648|29681|29909	C	A	A	T	C	T	T	T	A	A	T	C	A	G	T	G	T	G	T	A	A	C	A	T	T	A	G	G	G	A	G	G	A	C	T	T	G	A	A	A	G	A	G	C	C	A	C
1598	Delta	>115647|29681|29909	C	A	A	T	C	T	T	T	A	A	T	C	A	G	T	G	T	G	T	A	A	C	A	T	T	A	G	G	G	A	G	G	A	C	T	T	G	A	A	A	G	A	G	C	C	A	C
1599	Delta	>115646|29681|29909	C	A	A	T	C	T	T	T	A	A	T	C	A	G	T	G	T	G	T	A	A	C	A	T	T	A	G	G	G	A	G	G	A	C	T	T	G	A	A	A	G	A	G	C	C	A	C
1600	Delta	>115645|29562|29790	C	A	A	T	C	T	T	T	A	A	T	C	A	G	T	G	T	G	T	A	A	C	A	T	T	A	G	G	G	A	G	G	A	C	T	T	G	A	A	A	G	A	G	C	C	A	C
1601	Delta	>115644|29562|29790	C	A	A	T	C	T	T	T	A	A	T	C	A	G	T	G	T	G	T	A	A	C	A	T	T	A	G	G	G	A	G	G	A	C	T	T	G	A	A	A	G	A	G	C	C	A	C
1602	Delta	>115643|29571|29799	C	A	A	T	C	T	T	T	A	A	T	C	A	G	T	G	T	G	T	A	A	C	A	T	T	A	G	G	G	A	G	G	A	C	T	T	G	A	A	A	G	A	G	C	C	A	C
1603	Delta	>115642|29571|29799	C	A	A	T	C	T	T	T	A	A	T	C	A	G	T	G	T	G	T	A	A	C	A	T	T	A	G	G	G	A	G	G	A	C	T	T	G	A	A	A	G	A	G	C	C	A	C
1604	Delta	>115641|29571|29799	C	A	A	T	C	T	T	T	A	A	T	C	A	G	T	G	T	G	T	A	A	C	A	T	T	A	G	G	G	A	G	G	A	C	T	T	G	A	A	A	G	A	G	C	C	A	C
1605	Delta	>115640|29571|29799	C	A	A	T	C	T	T	T	A	A	T	C	A	G	T	G	T	G	T	A	A	C	A	T	T	A	G	G	G	A	G	G	A	C	T	T	G	A	A	A	G	A	G	C	C	A	C
1606	Delta	>115639|29571|29799	C	A	A	T	C	T	T	T	A	A	T	C	A	G	T	G	T	G	T	A	A	C	A	T	T	A	G	G	G	A	G	G	A	C	T	T	G	A	A	A	G	A	G	C	C	A	C
1607	Delta	>115638|29571|29799	C	A	A	T	C	T	T	T	A	A	T	C	A	G	T	G	T	G	T	A	A	C	A	T	T	A	G	G	G	A	G	G	A	C	T	T	G	A	A	A	G	A	G	C	C	A	C
1608	Delta	>115637|29654|29882	C	A	A	T	C	T	T	T	A	A	T	C	A	G	T	G	T	G	T	A	A	C	A	T	T	A	G	G	G	A	G	G	A	C	T	T	G	A	A	A	G	A	G	C	C	A	C
1609	Delta	>115636|29654|29882	C	A	A	T	C	T	T	T	A	A	T	C	A	G	T	G	T	G	T	A	A	C	A	T	T	A	G	G	G	A	G	G	A	C	T	T	G	A	A	A	G	A	G	C	C	A	C
1610	Delta	>115635|29654|29882	C	A	A	T	C	T	T	T	A	A	T	C	A	G	T	G	T	G	T	A	A	C	A	T	T	A	G	G	G	A	G	G	A	C	T	T	G	A	A	A	G	A	G	C	C	A	C
1611	Delta	>115634|29654|29882	C	A	A	T	C	T	T	T	A	A	T	C	A	G	T	G	T	G	T	A	A	C	A	T	T	A	G	G	G	A	G	G	A	C	T	T	G	A	A	A	G	A	G	C	C	A	C
1612	Delta	>115633|29654|29882	C	A	A	T	C	T	T	T	A	A	T	C	A	G	T	G	T	G	T	A	A	C	A	T	T	A	G	G	G	A	G	G	A	C	T	T	G	A	A	A	G	A	G	C	C	A	C
1613	Delta	>115632|29588|29816	C	A	A	T	C	T	T	T	A	A	T	C	A	G	T	G	T	G	T	A	A	C	A	T	T	A	G	G	G	A	G	G	A	C	T	T	G	A	A	A	G	A	G	C	C	A	C
1614	Delta	>115631|29601|29829	C	A	A	T	C	T	T	T	A	A	T	C	A	G	T	G	T	G	T	A	A	C	A	T	T	A	G	G	G	A	G	G	A	C	T	T	G	A	A	A	G	A	G	C	C	A	C
1615	Delta	>115627|29651|29879	C	A	A	T	C	T	T	T	A	A	T	C	A	G	T	G	T	G	T	A	A	C	A	T	T	A	G	G	G	A	G	G	A	C	T	T	G	A	A	A	G	A	G	C	C	A	C
1616	Delta	>115626|29651|29879	C	A	A	T	C	T	T	T	A	A	T	C	A	G	T	G	T	G	T	A	A	C	A	T	T	A	G	G	G	A	G	G	A	C	T	T	G	A	A	A	G	A	G	C	C	A	C
1617	Delta	>115625|29654|29882	C	A	A	T	C	T	T	T	A	A	T	C	A	G	T	G	T	G	T	A	A	C	A	T	T	A	G	G	G	A	G	G	A	C	T	T	G	A	A	A	G	A	G	C	C	A	C
1618	Delta	>115624|29662|29890	C	A	A	T	C	T	T	T	A	A	T	C	A	G	T	G	T	G	T	A	A	C	A	T	T	A	G	G	G	A	G	G	A	C	T	T	G	A	A	A	G	A	G	C	C	A	C
1619	Delta	>115623|29662|29890	C	A	A	T	C	T	T	T	A	A	T	C	A	G	T	G	T	G	T	A	A	C	A	T	T	A	G	G	G	A	G	G	A	C	T	T	G	A	A	A	G	A	G	C	C	A	C
1620	Delta	>115622|29662|29890	C	A	A	T	C	T	T	T	A	A	T	C	A	G	T	G	T	G	T	A	A	C	A	T	T	A	G	G	G	A	G	G	A	C	T	T	G	A	A	A	G	A	G	C	C	A	C
1621	Delta	>115621|29662|29890	C	A	A	T	C	T	T	T	A	A	T	C	A	G	T	G	T	G	T	A	A	C	A	T	T	A	G	G	G	A	G	G	A	C	T	T	G	A	A	A	G	A	G	C	C	A	C
1622	Delta	>115620|29662|29890	C	A	A	T	C	T	T	T	A	A	T	C	A	G	T	G	T	G	T	A	A	C	A	T	T	A	G	G	G	A	G	G	A	C	T	T	G	A	A	A	G	A	G	C	C	A	C
1623	Delta	>115619|29662|29890	C	A	A	T	C	T	T	T	A	A	T	C	A	G	T	G	T	G	T	A	A	C	A	T	T	A	G	G	G	A	G	G	A	C	T	T	G	A	A	A	G	A	G	C	C	A	C
1624	Delta	>115618|29662|29890	C	A	A	T	C	T	T	T	A	A	T	C	A	G	T	G	T	G	T	A	A	C	A	T	T	A	G	G	G	A	G	G	A	C	T	T	G	A	A	A	G	A	G	C	C	A	C
1625	Delta	>115617|29662|29890	C	A	A	T	C	T	T	T	A	A	T	C	A	G	T	G	T	G	T	A	A	C	A	T	T	A	G	G	G	A	G	G	A	C	T	T	G	A	A	A	G	A	G	C	C	A	C
1626	Delta	>115615|29662|29890	C	A	A	T	C	T	T	T	A	A	T	C	A	G	T	G	T	G	T	A	A	C	A	T	T	A	G	G	G	A	G	G	A	C	T	T	G	A	A	A	G	A	G	C	C	A	C
1627	Delta	>115614|29662|29890	C	A	A	T	C	T	T	T	A	A	T	C	A	G	T	G	T	G	T	A	A	C	A	T	T	A	G	G	G	A	G	G	A	C	T	T	G	A	A	A	G	A	G	C	C	A	C
1628	Delta	>115613|29662|29890	C	A	A	T	C	T	T	T	A	A	T	C	A	G	T	G	T	G	T	A	A	C	A	T	T	A	G	G	G	A	G	G	A	C	T	T	G	A	A	A	G	A	G	C	C	A	C
1629	Delta	>115612|29662|29890	C	A	A	T	C	T	T	T	A	A	T	C	A	G	T	G	T	G	T	A	A	C	A	T	T	A	G	G	G	A	G	G	A	C	T	T	G	A	A	A	G	A	G	C	C	A	C
1630	Delta	>115611|29662|29890	C	A	A	T	C	T	T	T	A	A	T	C	A	G	T	G	T	G	T	A	A	C	A	T	T	A	G	G	G	A	G	G	A	C	T	T	G	A	A	A	G	A	G	C	C	A	C
1631	Delta	>115610|29662|29890	C	A	A	T	C	T	T	T	A	A	T	C	A	G	T	G	T	G	T	A	A	C	A	T	T	A	G	G	G	A	G	G	A	C	T	T	G	A	A	A	G	A	G	C	C	A	C
1632	Delta	>115609|29662|29890	C	A	A	T	C	T	T	T	A	A	T	C	A	G	T	G	T	G	T	A	A	C	A	T	T	A	G	G	G	A	G	G	A	C	T	T	G	A	A	A	G	A	G	C	C	A	C
1633	Delta	>115608|29662|29890	C	A	A	T	C	T	T	T	A	A	T	C	A	G	T	G	T	G	T	A	A	C	A	T	T	A	G	G	G	A	G	G	A	C	T	T	G	A	A	A	G	A	G	C	C	A	C
1634	Delta	>115607|29662|29890	C	A	A	T	C	T	T	T	A	A	T	C	A	G	T	G	T	G	T	A	A	C	A	T	T	A	G	G	G	A	G	G	A	C	T	T	G	A	A	A	G	A	G	C	C	A	C
1635	Delta	>115606|29662|29890	C	A	A	T	C	T	T	T	A	A	T	C	A	G	T	G	T	G	T	A	A	C	A	T	T	A	G	G	G	A	G	G	A	C	T	T	G	A	A	A	G	A	G	C	C	A	C
1636	Delta	>115605|29662|29890	C	A	A	T	C	T	T	T	A	A	T	C	A	G	T	G	T	G	T	A	A	C	A	T	T	A	G	G	G	A	G	G	A	C	T	T	G	A	A	A	G	A	G	C	C	A	C
1637	Delta	>115604|29662|29890	C	A	A	T	C	T	T	T	A	A	T	C	A	G	T	G	T	G	T	A	A	C	A	T	T	A	G	G	G	A	G	G	A	C	T	T	G	A	A	A	G	A	G	C	C	A	C
1638	Delta	>115603|29662|29890	C	A	A	T	C	T	T	T	A	A	T	C	A	G	T	G	T	G	T	A	A	C	A	T	T	A	G	G	G	A	G	G	A	C	T	T	G	A	A	A	G	A	G	C	C	A	C
1639	Delta	>115602|29671|29899	C	A	A	T	C	T	T	T	A	A	T	C	A	G	T	G	T	G	T	A	A	C	A	T	T	A	G	G	G	A	G	G	A	C	T	T	G	A	A	A	G	A	G	C	C	A	C
1640	Delta	>115601|29662|29890	C	A	A	T	C	T	T	T	A	A	T	C	A	G	T	G	T	G	T	A	A	C	A	T	T	A	G	G	G	A	G	G	A	C	T	T	G	A	A	A	G	A	G	C	C	A	C
1641	Delta	>115600|29662|29890	C	A	A	T	C	T	T	T	A	A	T	C	A	G	T	G	T	G	T	A	A	C	A	T	T	A	G	G	G	A	G	G	A	C	T	T	G	A	A	A	G	A	G	C	C	A	C
1642	Delta	>115599|29662|29890	C	A	A	T	C	T	T	T	A	A	T	C	A	G	T	G	T	G	T	A	A	C	A	T	T	A	G	G	G	A	G	G	A	C	T	T	G	A	A	A	G	A	G	C	C	A	C
1643	Delta	>115597|29662|29890	C	A	A	T	C	T	T	T	A	A	T	C	A	G	T	G	T	G	T	A	A	C	A	T	T	A	G	G	G	A	G	G	A	C	T	T	G	A	A	A	G	A	G	C	C	A	C
1644	Delta	>115596|29662|29890	C	A	A	T	C	T	T	T	A	A	T	C	A	G	T	G	T	G	T	A	A	C	A	T	T	A	G	G	G	A	G	G	A	C	T	T	G	A	A	A	G	A	G	C	C	A	C
1645	Delta	>115595|29662|29890	C	A	A	T	C	T	T	T	A	A	T	C	A	G	T	G	T	G	T	A	A	C	A	T	T	A	G	G	G	A	G	G	A	C	T	T	G	A	A	A	G	A	G	C	C	A	C
1646	Delta	>115594|29671|29899	C	A	A	T	C	T	T	T	A	A	T	C	A	G	T	G	T	G	T	A	A	C	A	T	T	A	G	G	G	A	G	G	A	C	T	T	G	A	A	A	G	A	G	C	C	A	C
1647	Delta	>115593|29662|29890	C	A	A	T	C	T	T	T	A	A	T	C	A	G	T	G	T	G	T	A	A	C	A	T	T	A	G	G	G	A	G	G	A	C	T	T	G	A	A	A	G	A	G	C	C	A	C
1648	Delta	>115592|29662|29890	C	A	A	T	C	T	T	T	A	A	T	C	A	G	T	G	T	G	T	A	A	C	A	T	T	A	G	G	G	A	G	G	A	C	T	T	G	A	A	A	G	A	G	C	C	A	C
1649	Delta	>115591|29662|29890	C	A	A	T	C	T	T	T	A	A	T	C	A	G	T	G	T	G	T	A	A	C	A	T	T	A	G	G	G	A	G	G	A	C	T	T	G	A	A	A	G	A	G	C	C	A	C
1650	Delta	>115590|29656|29884	C	A	A	T	C	T	T	T	A	A	T	C	A	G	T	G	T	G	T	A	A	C	A	T	T	A	G	G	G	A	G	G	A	C	T	T	G	A	A	A	G	A	G	C	C	A	C
1651	Delta	>115589|29662|29890	C	A	A	T	C	T	T	T	A	A	T	C	A	G	T	G	T	G	T	A	A	C	A	T	T	A	G	G	G	A	G	G	A	C	T	T	G	A	A	A	G	A	G	C	C	A	C
1652	Delta	>115587|29662|29890	C	A	A	T	C	T	T	T	A	A	T	C	A	G	T	G	T	G	T	A	A	C	A	T	T	A	G	G	G	A	G	G	A	C	T	T	G	A	A	A	G	A	G	C	C	A	C
1653	Delta	>115586|29662|29890	C	A	A	T	C	T	T	T	A	A	T	C	A	G	T	G	T	G	T	A	A	C	A	T	T	A	G	G	G	A	G	G	A	C	T	T	G	A	A	A	G	A	G	C	C	A	C
1654	Delta	>115585|29671|29899	C	A	A	T	C	T	T	T	A	A	T	C	A	G	T	G	T	G	T	A	A	C	A	T	T	A	G	G	G	A	G	G	A	C	T	T	G	A	A	A	G	A	G	C	C	A	C
1655	Delta	>115584|29659|29887	C	A	A	T	C	T	T	T	A	A	T	C	A	G	T	G	T	G	T	A	A	C	A	T	T	A	G	G	G	A	G	G	A	C	T	T	G	A	A	A	G	A	G	C	C	A	C
1656	Delta	>115583|29662|29890	C	A	A	T	C	T	T	T	A	A	T	C	A	G	T	G	T	G	T	A	A	C	A	T	T	A	G	G	G	A	G	G	A	C	T	T	G	A	A	A	G	A	G	C	C	A	C
1657	Delta	>115582|29662|29890	C	A	A	T	C	T	T	T	A	A	T	C	A	G	T	G	T	G	T	A	A	C	A	T	T	A	G	G	G	A	G	G	A	C	T	T	G	A	A	A	G	A	G	C	C	A	C
1658	Delta	>115578|29662|29890	C	A	A	T	C	T	T	T	A	A	T	C	A	G	T	G	T	G	T	A	A	C	A	T	T	A	G	G	G	A	G	G	A	C	T	T	G	A	A	A	G	A	G	C	C	A	C
1659	Delta	>115576|29662|29890	C	A	A	T	C	T	T	T	A	A	T	C	A	G	T	G	T	G	T	A	A	C	A	T	T	A	G	G	G	A	G	G	A	C	T	T	G	A	A	A	G	A	G	C	C	A	C
1660	Delta	>115575|29662|29890	C	A	A	T	C	T	T	T	A	A	T	C	A	G	T	G	T	G	T	A	A	C	A	T	T	A	G	G	G	A	G	G	A	C	T	T	G	A	A	A	G	A	G	C	C	A	C
1661	Delta	>115574|29662|29890	C	A	A	T	C	T	T	T	A	A	T	C	A	G	T	G	T	G	T	A	A	C	A	T	T	A	G	G	G	A	G	G	A	C	T	T	G	A	A	A	G	A	G	C	C	A	C
1662	Delta	>115573|29662|29890	C	A	A	T	C	T	T	T	A	A	T	C	A	G	T	G	T	G	T	A	A	C	A	T	T	A	G	G	G	A	G	G	A	C	T	T	G	A	A	A	G	A	G	C	C	A	C
1663	Delta	>115572|29662|29890	C	A	A	T	C	T	T	T	A	A	T	C	A	G	T	G	T	G	T	A	A	C	A	T	T	A	G	G	G	A	G	G	A	C	T	T	G	A	A	A	G	A	G	C	C	A	C
1664	Delta	>115571|29662|29890	C	A	A	T	C	T	T	T	A	A	T	C	A	G	T	G	T	G	T	A	A	C	A	T	T	A	G	G	G	A	G	G	A	C	T	T	G	A	A	A	G	A	G	C	C	A	C
1665	Delta	>115570|29662|29890	C	A	A	T	C	T	T	T	A	A	T	C	A	G	T	G	T	G	T	A	A	C	A	T	T	A	G	G	G	A	G	G	A	C	T	T	G	A	A	A	G	A	G	C	C	A	C
1666	Delta	>115569|29662|29890	C	A	A	T	C	T	T	T	A	A	T	C	A	G	T	G	T	G	T	A	A	C	A	T	T	A	G	G	G	A	G	G	A	C	T	T	G	A	A	A	G	A	G	C	C	A	C
1667	Delta	>115568|29662|29890	C	A	A	T	C	T	T	T	A	A	T	C	A	G	T	G	T	G	T	A	A	C	A	T	T	A	G	G	G	A	G	G	A	C	T	T	G	A	A	A	G	A	G	C	C	A	C
1668	Delta	>115567|29662|29890	C	A	A	T	C	T	T	T	A	A	T	C	A	G	T	G	T	G	T	A	A	C	A	T	T	A	G	G	G	A	G	G	A	C	T	T	G	A	A	A	G	A	G	C	C	A	C
1669	Delta	>115564|29662|29890	C	A	A	T	C	T	T	T	A	A	T	C	A	G	T	G	T	G	T	A	A	C	A	T	T	A	G	G	G	A	G	G	A	C	T	T	G	A	A	A	G	A	G	C	C	A	C
1670	Delta	>115563|29662|29890	C	A	A	T	C	T	T	T	A	A	T	C	A	G	T	G	T	G	T	A	A	C	A	T	T	A	G	G	G	A	G	G	A	C	T	T	G	A	A	A	G	A	G	C	C	A	C
1671	Delta	>115562|29662|29890	C	A	A	T	C	T	T	T	A	A	T	C	A	G	T	G	T	G	T	A	A	C	A	T	T	A	G	G	G	A	G	G	A	C	T	T	G	A	A	A	G	A	G	C	C	A	C
1672	Delta	>115561|29662|29890	C	A	A	T	C	T	T	T	A	A	T	C	A	G	T	G	T	G	T	A	A	C	A	T	T	A	G	G	G	A	G	G	A	C	T	T	G	A	A	A	G	A	G	C	C	A	C
1673	Delta	>115560|29662|29890	C	A	A	T	C	T	T	T	A	A	T	C	A	G	T	G	T	G	T	A	A	C	A	T	T	A	G	G	G	A	G	G	A	C	T	T	G	A	A	A	G	A	G	C	C	A	C
1674	Delta	>115559|29662|29890	C	A	A	T	C	T	T	T	A	A	T	C	A	G	T	G	T	G	T	A	A	C	A	T	T	A	G	G	G	A	G	G	A	C	T	T	G	A	A	A	G	A	G	C	C	A	C
1675	Delta	>115558|29662|29890	C	A	A	T	C	T	T	T	A	A	T	C	A	G	T	G	T	G	T	A	A	C	A	T	T	A	G	G	G	A	G	G	A	C	T	T	G	A	A	A	G	A	G	C	C	A	C
1676	Delta	>115557|29662|29890	C	A	A	T	C	T	T	T	A	A	T	C	A	G	T	G	T	G	T	A	A	C	A	T	T	A	G	G	G	A	G	G	A	C	T	T	G	A	A	A	G	A	G	C	C	A	C
1677	Delta	>115556|29662|29890	C	A	A	T	C	T	T	T	A	A	T	C	A	G	T	G	T	G	T	A	A	C	A	T	T	A	G	G	G	A	G	G	A	C	T	T	G	A	A	A	G	A	G	C	C	A	C
1678	Delta	>115555|29653|29881	C	A	A	T	C	T	T	T	A	A	T	C	A	G	T	G	T	G	T	A	A	C	A	T	T	A	G	G	G	A	G	G	A	C	T	T	G	A	A	A	G	A	G	C	C	A	C
1679	Delta	>115554|29662|29890	C	A	A	T	C	T	T	T	A	A	T	C	A	G	T	G	T	G	T	A	A	C	A	T	T	A	G	G	G	A	G	G	A	C	T	T	G	A	A	A	G	A	G	C	C	A	C
1680	Delta	>115553|29662|29890	C	A	A	T	C	T	T	T	A	A	T	C	A	G	T	G	T	G	T	A	A	C	A	T	T	A	G	G	G	A	G	G	A	C	T	T	G	A	A	A	G	A	G	C	C	A	C
1681	Delta	>115552|29662|29890	C	A	A	T	C	T	T	T	A	A	T	C	A	G	T	G	T	G	T	A	A	C	A	T	T	A	G	G	G	A	G	G	A	C	T	T	G	A	A	A	G	A	G	C	C	A	C
1682	Delta	>115551|29662|29890	C	A	A	T	C	T	T	T	A	A	T	C	A	G	T	G	T	G	T	A	A	C	A	T	T	A	G	G	G	A	G	G	A	C	T	T	G	A	A	A	G	A	G	C	C	A	C
1683	Delta	>115550|29662|29890	C	A	A	T	C	T	T	T	A	A	T	C	A	G	T	G	T	G	T	A	A	C	A	T	T	A	G	G	G	A	G	G	A	C	T	T	G	A	A	A	G	A	G	C	C	A	C
1684	Delta	>115549|29656|29884	C	A	A	T	C	T	T	T	A	A	T	C	A	G	T	G	T	G	T	A	A	C	A	T	T	A	G	G	G	A	G	G	A	C	T	T	G	A	A	A	G	A	G	C	C	A	C
1685	Delta	>115548|29662|29890	C	A	A	T	C	T	T	T	A	A	T	C	A	G	T	G	T	G	T	A	A	C	A	T	T	A	G	G	G	A	G	G	A	C	T	T	G	A	A	A	G	A	G	C	C	A	C
1686	Delta	>115547|29662|29890	C	A	A	T	C	T	T	T	A	A	T	C	A	G	T	G	T	G	T	A	A	C	A	T	T	A	G	G	G	A	G	G	A	C	T	T	G	A	A	A	G	A	G	C	C	A	C
1687	Delta	>115546|29662|29890	C	A	A	T	C	T	T	T	A	A	T	C	A	G	T	G	T	G	T	A	A	C	A	T	T	A	G	G	G	A	G	G	A	C	T	T	G	A	A	A	G	A	G	C	C	A	C
1688	Delta	>115545|29662|29890	C	A	A	T	C	T	T	T	A	A	T	C	A	G	T	G	T	G	T	A	A	C	A	T	T	A	G	G	G	A	G	G	A	C	T	T	G	A	A	A	G	A	G	C	C	A	C
1689	Delta	>115544|29662|29890	C	A	A	T	C	T	T	T	A	A	T	C	A	G	T	G	T	G	T	A	A	C	A	T	T	A	G	G	G	A	G	G	A	C	T	T	G	A	A	A	G	A	G	C	C	A	C
1690	Delta	>115543|29668|29896	C	A	A	T	C	T	T	T	A	A	T	C	A	G	T	G	T	G	T	A	A	C	A	T	T	A	G	G	G	A	G	G	A	C	T	T	G	A	A	A	G	A	G	C	C	A	C
1691	Delta	>115542|29662|29890	C	A	A	T	C	T	T	T	A	A	T	C	A	G	T	G	T	G	T	A	A	C	A	T	T	A	G	G	G	A	G	G	A	C	T	T	G	A	A	A	G	A	G	C	C	A	C
1692	Delta	>115540|29662|29890	C	A	A	T	C	T	T	T	A	A	T	C	A	G	T	G	T	G	T	A	A	C	A	T	T	A	G	G	G	A	G	G	A	C	T	T	G	A	A	A	G	A	G	C	C	A	C
1693	Delta	>115538|29662|29890	C	A	A	T	C	T	T	T	A	A	T	C	A	G	T	G	T	G	T	A	A	C	A	T	T	A	G	G	G	A	G	G	A	C	T	T	G	A	A	A	G	A	G	C	C	A	C
1694	Delta	>115537|29662|29890	C	A	A	T	C	T	T	T	A	A	T	C	A	G	T	G	T	G	T	A	A	C	A	T	T	A	G	G	G	A	G	G	A	C	T	T	G	A	A	A	G	A	G	C	C	A	C
1695	Delta	>115536|29662|29890	C	A	A	T	C	T	T	T	A	A	T	C	A	G	T	G	T	G	T	A	A	C	A	T	T	A	G	G	G	A	G	G	A	C	T	T	G	A	A	A	G	A	G	C	C	A	C
1696	Delta	>115535|29662|29890	C	A	A	T	C	T	T	T	A	A	T	C	A	G	T	G	T	G	T	A	A	C	A	T	T	A	G	G	G	A	G	G	A	C	T	T	G	A	A	A	G	A	G	C	C	A	C
1697	Delta	>115534|29671|29899	C	A	A	T	C	T	T	T	A	A	T	C	A	G	T	G	T	G	T	A	A	C	A	T	T	A	G	G	G	A	G	G	A	C	T	T	G	A	A	A	G	A	G	C	C	A	C
1698	Delta	>115532|29662|29890	C	A	A	T	C	T	T	T	A	A	T	C	A	G	T	G	T	G	T	A	A	C	A	T	T	A	G	G	G	A	G	G	A	C	T	T	G	A	A	A	G	A	G	C	C	A	C
1699	Delta	>115531|29662|29890	C	A	A	T	C	T	T	T	A	A	T	C	A	G	T	G	T	G	T	A	A	C	A	T	T	A	G	G	G	A	G	G	A	C	T	T	G	A	A	A	G	A	G	C	C	A	C
1700	Delta	>115529|29662|29890	C	A	A	T	C	T	T	T	A	A	T	C	A	G	T	G	T	G	T	A	A	C	A	T	T	A	G	G	G	A	G	G	A	C	T	T	G	A	A	A	G	A	G	C	C	A	C
1701	Delta	>115528|29662|29890	C	A	A	T	C	T	T	T	A	A	T	C	A	G	T	G	T	G	T	A	A	C	A	T	T	A	G	G	G	A	G	G	A	C	T	T	G	A	A	A	G	A	G	C	C	A	C
1702	Delta	>115527|29662|29890	C	A	A	T	C	T	T	T	A	A	T	C	A	G	T	G	T	G	T	A	A	C	A	T	T	A	G	G	G	A	G	G	A	C	T	T	G	A	A	A	G	A	G	C	C	A	C
1703	Delta	>115525|29662|29890	C	A	A	T	C	T	T	T	A	A	T	C	A	G	T	G	T	G	T	A	A	C	A	T	T	A	G	G	G	A	G	G	A	C	T	T	G	A	A	A	G	A	G	C	C	A	C
1704	Delta	>115524|29662|29890	C	A	A	T	C	T	T	T	A	A	T	C	A	G	T	G	T	G	T	A	A	C	A	T	T	A	G	G	G	A	G	G	A	C	T	T	G	A	A	A	G	A	G	C	C	A	C
1705	Delta	>115523|29662|29890	C	A	A	T	C	T	T	T	A	A	T	C	A	G	T	G	T	G	T	A	A	C	A	T	T	A	G	G	G	A	G	G	A	C	T	T	G	A	A	A	G	A	G	C	C	A	C
1706	Delta	>115522|29662|29890	C	A	A	T	C	T	T	T	A	A	T	C	A	G	T	G	T	G	T	A	A	C	A	T	T	A	G	G	G	A	G	G	A	C	T	T	G	A	A	A	G	A	G	C	C	A	C
1707	Delta	>115521|29662|29890	C	A	A	T	C	T	T	T	A	A	T	C	A	G	T	G	T	G	T	A	A	C	A	T	T	A	G	G	G	A	G	G	A	C	T	T	G	A	A	A	G	A	G	C	C	A	C
1708	Delta	>115520|29662|29890	C	A	A	T	C	T	T	T	A	A	T	C	A	G	T	G	T	G	T	A	A	C	A	T	T	A	G	G	G	A	G	G	A	C	T	T	G	A	A	A	G	A	G	C	C	A	C
1709	Delta	>115519|29662|29890	C	A	A	T	C	T	T	T	A	A	T	C	A	G	T	G	T	G	T	A	A	C	A	T	T	A	G	G	G	A	G	G	A	C	T	T	G	A	A	A	G	A	G	C	C	A	C
1710	Delta	>115518|29662|29890	C	A	A	T	C	T	T	T	A	A	T	C	A	G	T	G	T	G	T	A	A	C	A	T	T	A	G	G	G	A	G	G	A	C	T	T	G	A	A	A	G	A	G	C	C	A	C
1711	Delta	>115517|29662|29890	C	A	A	T	C	T	T	T	A	A	T	C	A	G	T	G	T	G	T	A	A	C	A	T	T	A	G	G	G	A	G	G	A	C	T	T	G	A	A	A	G	A	G	C	C	A	C
1712	Delta	>115516|29662|29890	C	A	A	T	C	T	T	T	A	A	T	C	A	G	T	G	T	G	T	A	A	C	A	T	T	A	G	G	G	A	G	G	A	C	T	T	G	A	A	A	G	A	G	C	C	A	C
1713	Delta	>115515|29647|29875	C	A	A	T	C	T	T	T	A	A	T	C	A	G	T	G	T	G	T	A	A	C	A	T	T	A	G	G	G	A	G	G	A	C	T	T	G	A	A	A	G	A	G	C	C	A	C
1714	Delta	>115513|29662|29890	C	A	A	T	C	T	T	T	A	A	T	C	A	G	T	G	T	G	T	A	A	C	A	T	T	A	G	G	G	A	G	G	A	C	T	T	G	A	A	A	G	A	G	C	C	A	C
1715	Delta	>115512|29662|29890	C	A	A	T	C	T	T	T	A	A	T	C	A	G	T	G	T	G	T	A	A	C	A	T	T	A	G	G	G	A	G	G	A	C	T	T	G	A	A	A	G	A	G	C	C	A	C
1716	Delta	>115511|29662|29890	C	A	A	T	C	T	T	T	A	A	T	C	A	G	T	G	T	G	T	A	A	C	A	T	T	A	G	G	G	A	G	G	A	C	T	T	G	A	A	A	G	A	G	C	C	A	C
1717	Delta	>115510|29662|29890	C	A	A	T	C	T	T	T	A	A	T	C	A	G	T	G	T	G	T	A	A	C	A	T	T	A	G	G	G	A	G	G	A	C	T	T	G	A	A	A	G	A	G	C	C	A	C
1718	Delta	>115509|29662|29890	C	A	A	T	C	T	T	T	A	A	T	C	A	G	T	G	T	G	T	A	A	C	A	T	T	A	G	G	G	A	G	G	A	C	T	T	G	A	A	A	G	A	G	C	C	A	C
1719	Delta	>115508|29662|29890	C	A	A	T	C	T	T	T	A	A	T	C	A	G	T	G	T	G	T	A	A	C	A	T	T	A	G	G	G	A	G	G	A	C	T	T	G	A	A	A	G	A	G	C	C	A	C
1720	Delta	>115507|29662|29890	C	A	A	T	C	T	T	T	A	A	T	C	A	G	T	G	T	G	T	A	A	C	A	T	T	A	G	G	G	A	G	G	A	C	T	T	G	A	A	A	G	A	G	C	C	A	C
1721	Delta	>115506|29662|29890	C	A	A	T	C	T	T	T	A	A	T	C	A	G	T	G	T	G	T	A	A	C	A	T	T	A	G	G	G	A	G	G	A	C	T	T	G	A	A	A	G	A	G	C	C	A	C
1722	Delta	>115504|29662|29890	C	A	A	T	C	T	T	T	A	A	T	C	A	G	T	G	T	G	T	A	A	C	A	T	T	A	G	G	G	A	G	G	A	C	T	T	G	A	A	A	G	A	G	C	C	A	C
1723	Delta	>115502|29662|29890	C	A	A	T	C	T	T	T	A	A	T	C	A	G	T	G	T	G	T	A	A	C	A	T	T	A	G	G	G	A	G	G	A	C	T	T	G	A	A	A	G	A	G	C	C	A	C
1724	Delta	>115500|29662|29890	C	A	A	T	C	T	T	T	A	A	T	C	A	G	T	G	T	G	T	A	A	C	A	T	T	A	G	G	G	A	G	G	A	C	T	T	G	A	A	A	G	A	G	C	C	A	C
1725	Delta	>115499|29662|29890	C	A	A	T	C	T	T	T	A	A	T	C	A	G	T	G	T	G	T	A	A	C	A	T	T	A	G	G	G	A	G	G	A	C	T	T	G	A	A	A	G	A	G	C	C	A	C
1726	Delta	>115498|29662|29890	C	A	A	T	C	T	T	T	A	A	T	C	A	G	T	G	T	G	T	A	A	C	A	T	T	A	G	G	G	A	G	G	A	C	T	T	G	A	A	A	G	A	G	C	C	A	C
1727	Delta	>115496|29662|29890	C	A	A	T	C	T	T	T	A	A	T	C	A	G	T	G	T	G	T	A	A	C	A	T	T	A	G	G	G	A	G	G	A	C	T	T	G	A	A	A	G	A	G	C	C	A	C
1728	Delta	>115495|29662|29890	C	A	A	T	C	T	T	T	A	A	T	C	A	G	T	G	T	G	T	A	A	C	A	T	T	A	G	G	G	A	G	G	A	C	T	T	G	A	A	A	G	A	G	C	C	A	C
1729	Delta	>115494|29662|29890	C	A	A	T	C	T	T	T	A	A	T	C	A	G	T	G	T	G	T	A	A	C	A	T	T	A	G	G	G	A	G	G	A	C	T	T	G	A	A	A	G	A	G	C	C	A	C
1730	Delta	>115493|29662|29890	C	A	A	T	C	T	T	T	A	A	T	C	A	G	T	G	T	G	T	A	A	C	A	T	T	A	G	G	G	A	G	G	A	C	T	T	G	A	A	A	G	A	G	C	C	A	C
1731	Delta	>115492|29662|29890	C	A	A	T	C	T	T	T	A	A	T	C	A	G	T	G	T	G	T	A	A	C	A	T	T	A	G	G	G	A	G	G	A	C	T	T	G	A	A	A	G	A	G	C	C	A	C
1732	Delta	>115491|29662|29890	C	A	A	T	C	T	T	T	A	A	T	C	A	G	T	G	T	G	T	A	A	C	A	T	T	A	G	G	G	A	G	G	A	C	T	T	G	A	A	A	G	A	G	C	C	A	C
1733	Delta	>115489|29662|29890	C	A	A	T	C	T	T	T	A	A	T	C	A	G	T	G	T	G	T	A	A	C	A	T	T	A	G	G	G	A	G	G	A	C	T	T	G	A	A	A	G	A	G	C	C	A	C
1734	Delta	>115488|29662|29890	C	A	A	T	C	T	T	T	A	A	T	C	A	G	T	G	T	G	T	A	A	C	A	T	T	A	G	G	G	A	G	G	A	C	T	T	G	A	A	A	G	A	G	C	C	A	C
1735	Delta	>115487|29662|29890	C	A	A	T	C	T	T	T	A	A	T	C	A	G	T	G	T	G	T	A	A	C	A	T	T	A	G	G	G	A	G	G	A	C	T	T	G	A	A	A	G	A	G	C	C	A	C
1736	Delta	>115486|29662|29890	C	A	A	T	C	T	T	T	A	A	T	C	A	G	T	G	T	G	T	A	A	C	A	T	T	A	G	G	G	A	G	G	A	C	T	T	G	A	A	A	G	A	G	C	C	A	C
1737	Delta	>115485|29662|29890	C	A	A	T	C	T	T	T	A	A	T	C	A	G	T	G	T	G	T	A	A	C	A	T	T	A	G	G	G	A	G	G	A	C	T	T	G	A	A	A	G	A	G	C	C	A	C
1738	Delta	>115484|29662|29890	C	A	A	T	C	T	T	T	A	A	T	C	A	G	T	G	T	G	T	A	A	C	A	T	T	A	G	G	G	A	G	G	A	C	T	T	G	A	A	A	G	A	G	C	C	A	C
1739	Delta	>115483|29662|29890	C	A	A	T	C	T	T	T	A	A	T	C	A	G	T	G	T	G	T	A	A	C	A	T	T	A	G	G	G	A	G	G	A	C	T	T	G	A	A	A	G	A	G	C	C	A	C
1740	Delta	>115482|29662|29890	C	A	A	T	C	T	T	T	A	A	T	C	A	G	T	G	T	G	T	A	A	C	A	T	T	A	G	G	G	A	G	G	A	C	T	T	G	A	A	A	G	A	G	C	C	A	C
1741	Delta	>115481|29662|29890	C	A	A	T	C	T	T	T	A	A	T	C	A	G	T	G	T	G	T	A	A	C	A	T	T	A	G	G	G	A	G	G	A	C	T	T	G	A	A	A	G	A	G	C	C	A	C
1742	Delta	>115479|29662|29890	C	A	A	T	C	T	T	T	A	A	T	C	A	G	T	G	T	G	T	A	A	C	A	T	T	A	G	G	G	A	G	G	A	C	T	T	G	A	A	A	G	A	G	C	C	A	C
1743	Delta	>115478|29662|29890	C	A	A	T	C	T	T	T	A	A	T	C	A	G	T	G	T	G	T	A	A	C	A	T	T	A	G	G	G	A	G	G	A	C	T	T	G	A	A	A	G	A	G	C	C	A	C
1744	Delta	>115477|29662|29890	C	A	A	T	C	T	T	T	A	A	T	C	A	G	T	G	T	G	T	A	A	C	A	T	T	A	G	G	G	A	G	G	A	C	T	T	G	A	A	A	G	A	G	C	C	A	C
1745	Delta	>115476|29662|29890	C	A	A	T	C	T	T	T	A	A	T	C	A	G	T	G	T	G	T	A	A	C	A	T	T	A	G	G	G	A	G	G	A	C	T	T	G	A	A	A	G	A	G	C	C	A	C
1746	Delta	>115475|29662|29890	C	A	A	T	C	T	T	T	A	A	T	C	A	G	T	G	T	G	T	A	A	C	A	T	T	A	G	G	G	A	G	G	A	C	T	T	G	A	A	A	G	A	G	C	C	A	C
1747	Delta	>115474|29662|29890	C	A	A	T	C	T	T	T	A	A	T	C	A	G	T	G	T	G	T	A	A	C	A	T	T	A	G	G	G	A	G	G	A	C	T	T	G	A	A	A	G	A	G	C	C	A	C
1748	Delta	>115473|29662|29890	C	A	A	T	C	T	T	T	A	A	T	C	A	G	T	G	T	G	T	A	A	C	A	T	T	A	G	G	G	A	G	G	A	C	T	T	G	A	A	A	G	A	G	C	C	A	C
1749	Delta	>115472|29662|29890	C	A	A	T	C	T	T	T	A	A	T	C	A	G	T	G	T	G	T	A	A	C	A	T	T	A	G	G	G	A	G	G	A	C	T	T	G	A	A	A	G	A	G	C	C	A	C
1750	Delta	>115471|29662|29890	C	A	A	T	C	T	T	T	A	A	T	C	A	G	T	G	T	G	T	A	A	C	A	T	T	A	G	G	G	A	G	G	A	C	T	T	G	A	A	A	G	A	G	C	C	A	C
1751	Delta	>115468|29662|29890	C	A	A	T	C	T	T	T	A	A	T	C	A	G	T	G	T	G	T	A	A	C	A	T	T	A	G	G	G	A	G	G	A	C	T	T	G	A	A	A	G	A	G	C	C	A	C
1752	Delta	>115466|29662|29890	C	A	A	T	C	T	T	T	A	A	T	C	A	G	T	G	T	G	T	A	A	C	A	T	T	A	G	G	G	A	G	G	A	C	T	T	G	A	A	A	G	A	G	C	C	A	C
1753	Delta	>115465|29662|29890	C	A	A	T	C	T	T	T	A	A	T	C	A	G	T	G	T	G	T	A	A	C	A	T	T	A	G	G	G	A	G	G	A	C	T	T	G	A	A	A	G	A	G	C	C	A	C
1754	Delta	>115463|29653|29881	C	A	A	T	C	T	T	T	A	A	T	C	A	G	T	G	T	G	T	A	A	C	A	T	T	A	G	G	G	A	G	G	A	C	T	T	G	A	A	A	G	A	G	C	C	A	C
1755	Delta	>115462|29662|29890	C	A	A	T	C	T	T	T	A	A	T	C	A	G	T	G	T	G	T	A	A	C	A	T	T	A	G	G	G	A	G	G	A	C	T	T	G	A	A	A	G	A	G	C	C	A	C
1756	Delta	>115427|29662|29890	C	A	A	T	C	T	T	T	A	A	T	C	A	G	T	G	T	G	T	A	A	C	A	T	T	A	G	G	G	A	G	G	A	C	T	T	G	A	A	A	G	A	G	C	C	A	C
1757	Delta	>115425|29662|29890	C	A	A	T	C	T	T	T	A	A	T	C	A	G	T	G	T	G	T	A	A	C	A	T	T	A	G	G	G	A	G	G	A	C	T	T	G	A	A	A	G	A	G	C	C	A	C
1758	Delta	>115424|29662|29890	C	A	A	T	C	T	T	T	A	A	T	C	A	G	T	G	T	G	T	A	A	C	A	T	T	A	G	G	G	A	G	G	A	C	T	T	G	A	A	A	G	A	G	C	C	A	C
1759	Delta	>115420|29662|29890	C	A	A	T	C	T	T	T	A	A	T	C	A	G	T	G	T	G	T	A	A	C	A	T	T	A	G	G	G	A	G	G	A	C	T	T	G	A	A	A	G	A	G	C	C	A	C
1760	Delta	>115419|29662|29890	C	A	A	T	C	T	T	T	A	A	T	C	A	G	T	G	T	G	T	A	A	C	A	T	T	A	G	G	G	A	G	G	A	C	T	T	G	A	A	A	G	A	G	C	C	A	C
1761	Delta	>115418|29662|29890	C	A	A	T	C	T	T	T	A	A	T	C	A	G	T	G	T	G	T	A	A	C	A	T	T	A	G	G	G	A	G	G	A	C	T	T	G	A	A	A	G	A	G	C	C	A	C
1762	Delta	>115417|29662|29890	C	A	A	T	C	T	T	T	A	A	T	C	A	G	T	G	T	G	T	A	A	C	A	T	T	A	G	G	G	A	G	G	A	C	T	T	G	A	A	A	G	A	G	C	C	A	C
1763	Delta	>115416|29662|29890	C	A	A	T	C	T	T	T	A	A	T	C	A	G	T	G	T	G	T	A	A	C	A	T	T	A	G	G	G	A	G	G	A	C	T	T	G	A	A	A	G	A	G	C	C	A	C
1764	Delta	>115415|29662|29890	C	A	A	T	C	T	T	T	A	A	T	C	A	G	T	G	T	G	T	A	A	C	A	T	T	A	G	G	G	A	G	G	A	C	T	T	G	A	A	A	G	A	G	C	C	A	C
1765	Delta	>115414|29662|29890	C	A	A	T	C	T	T	T	A	A	T	C	A	G	T	G	T	G	T	A	A	C	A	T	T	A	G	G	G	A	G	G	A	C	T	T	G	A	A	A	G	A	G	C	C	A	C
1766	Delta	>115413|29662|29890	C	A	A	T	C	T	T	T	A	A	T	C	A	G	T	G	T	G	T	A	A	C	A	T	T	A	G	G	G	A	G	G	A	C	T	T	G	A	A	A	G	A	G	C	C	A	C
1767	Delta	>115412|29662|29890	C	A	A	T	C	T	T	T	A	A	T	C	A	G	T	G	T	G	T	A	A	C	A	T	T	A	G	G	G	A	G	G	A	C	T	T	G	A	A	A	G	A	G	C	C	A	C
1768	Delta	>115411|29662|29890	C	A	A	T	C	T	T	T	A	A	T	C	A	G	T	G	T	G	T	A	A	C	A	T	T	A	G	G	G	A	G	G	A	C	T	T	G	A	A	A	G	A	G	C	C	A	C
1769	Delta	>115410|29662|29890	C	A	A	T	C	T	T	T	A	A	T	C	A	G	T	G	T	G	T	A	A	C	A	T	T	A	G	G	G	A	G	G	A	C	T	T	G	A	A	A	G	A	G	C	C	A	C
1770	Delta	>115409|29662|29890	C	A	A	T	C	T	T	T	A	A	T	C	A	G	T	G	T	G	T	A	A	C	A	T	T	A	G	G	G	A	G	G	A	C	T	T	G	A	A	A	G	A	G	C	C	A	C
1771	Delta	>115408|29675|29903	C	A	A	T	C	T	T	T	A	A	T	C	A	G	T	G	T	G	T	A	A	C	A	T	T	A	G	G	G	A	G	G	A	C	T	T	G	A	A	A	G	A	G	C	C	A	C
1772	Delta	>115406|29656|29884	C	A	A	T	C	T	T	T	A	A	T	C	A	G	T	G	T	G	T	A	A	C	A	T	T	A	G	G	G	A	G	G	A	C	T	T	G	A	A	A	G	A	G	C	C	A	C
1773	Delta	>115404|29662|29890	C	A	A	T	C	T	T	T	A	A	T	C	A	G	T	G	T	G	T	A	A	C	A	T	T	A	G	G	G	A	G	G	A	C	T	T	G	A	A	A	G	A	G	C	C	A	C
1774	Delta	>115403|29662|29890	C	A	A	T	C	T	T	T	A	A	T	C	A	G	T	G	T	G	T	A	A	C	A	T	T	A	G	G	G	A	G	G	A	C	T	T	G	A	A	A	G	A	G	C	C	A	C
1775	Delta	>115402|29662|29890	C	A	A	T	C	T	T	T	A	A	T	C	A	G	T	G	T	G	T	A	A	C	A	T	T	A	G	G	G	A	G	G	A	C	T	T	G	A	A	A	G	A	G	C	C	A	C
1776	Delta	>115401|29662|29890	C	A	A	T	C	T	T	T	A	A	T	C	A	G	T	G	T	G	T	A	A	C	A	T	T	A	G	G	G	A	G	G	A	C	T	T	G	A	A	A	G	A	G	C	C	A	C
1777	Delta	>115400|29662|29890	C	A	A	T	C	T	T	T	A	A	T	C	A	G	T	G	T	G	T	A	A	C	A	T	T	A	G	G	G	A	G	G	A	C	T	T	G	A	A	A	G	A	G	C	C	A	C
1778	Delta	>115399|29662|29890	C	A	A	T	C	T	T	T	A	A	T	C	A	G	T	G	T	G	T	A	A	C	A	T	T	A	G	G	G	A	G	G	A	C	T	T	G	A	A	A	G	A	G	C	C	A	C
1779	Delta	>115398|29662|29890	C	A	A	T	C	T	T	T	A	A	T	C	A	G	T	G	T	G	T	A	A	C	A	T	T	A	G	G	G	A	G	G	A	C	T	T	G	A	A	A	G	A	G	C	C	A	C
1780	Delta	>115397|29662|29890	C	A	A	T	C	T	T	T	A	A	T	C	A	G	T	G	T	G	T	A	A	C	A	T	T	A	G	G	G	A	G	G	A	C	T	T	G	A	A	A	G	A	G	C	C	A	C
1781	Delta	>115395|29671|29899	C	A	A	T	C	T	T	T	A	A	T	C	A	G	T	G	T	G	T	A	A	C	A	T	T	A	G	G	G	A	G	G	A	C	T	T	G	A	A	A	G	A	G	C	C	A	C
1782	Delta	>115394|29662|29890	C	A	A	T	C	T	T	T	A	A	T	C	A	G	T	G	T	G	T	A	A	C	A	T	T	A	G	G	G	A	G	G	A	C	T	T	G	A	A	A	G	A	G	C	C	A	C
1783	Delta	>115393|29662|29890	C	A	A	T	C	T	T	T	A	A	T	C	A	G	T	G	T	G	T	A	A	C	A	T	T	A	G	G	G	A	G	G	A	C	T	T	G	A	A	A	G	A	G	C	C	A	C
1784	Delta	>115390|29662|29890	C	A	A	T	C	T	T	T	A	A	T	C	A	G	T	G	T	G	T	A	A	C	A	T	T	A	G	G	G	A	G	G	A	C	T	T	G	A	A	A	G	A	G	C	C	A	C
1785	Delta	>115389|29662|29890	C	A	A	T	C	T	T	T	A	A	T	C	A	G	T	G	T	G	T	A	A	C	A	T	T	A	G	G	G	A	G	G	A	C	T	T	G	A	A	A	G	A	G	C	C	A	C
1786	Delta	>115388|29662|29890	C	A	A	T	C	T	T	T	A	A	T	C	A	G	T	G	T	G	T	A	A	C	A	T	T	A	G	G	G	A	G	G	A	C	T	T	G	A	A	A	G	A	G	C	C	A	C
1787	Delta	>115387|29662|29890	C	A	A	T	C	T	T	T	A	A	T	C	A	G	T	G	T	G	T	A	A	C	A	T	T	A	G	G	G	A	G	G	A	C	T	T	G	A	A	A	G	A	G	C	C	A	C
1788	Delta	>115386|29662|29890	C	A	A	T	C	T	T	T	A	A	T	C	A	G	T	G	T	G	T	A	A	C	A	T	T	A	G	G	G	A	G	G	A	C	T	T	G	A	A	A	G	A	G	C	C	A	C
1789	Delta	>115385|29677|29905	C	A	A	T	C	T	T	T	A	A	T	C	A	G	T	G	T	G	T	A	A	C	A	T	T	A	G	G	G	A	G	G	A	C	T	T	G	A	A	A	G	A	G	C	C	A	C
1790	Delta	>115384|29662|29890	C	A	A	T	C	T	T	T	A	A	T	C	A	G	T	G	T	G	T	A	A	C	A	T	T	A	G	G	G	A	G	G	A	C	T	T	G	A	A	A	G	A	G	C	C	A	C
1791	Delta	>115382|29662|29890	C	A	A	T	C	T	T	T	A	A	T	C	A	G	T	G	T	G	T	A	A	C	A	T	T	A	G	G	G	A	G	G	A	C	T	T	G	A	A	A	G	A	G	C	C	A	C
1792	Delta	>115381|29662|29890	C	A	A	T	C	T	T	T	A	A	T	C	A	G	T	G	T	G	T	A	A	C	A	T	T	A	G	G	G	A	G	G	A	C	T	T	G	A	A	A	G	A	G	C	C	A	C
1793	Delta	>115378|29662|29890	C	A	A	T	C	T	T	T	A	A	T	C	A	G	T	G	T	G	T	A	A	C	A	T	T	A	G	G	G	A	G	G	A	C	T	T	G	A	A	A	G	A	G	C	C	A	C
1794	Delta	>115377|29662|29890	C	A	A	T	C	T	T	T	A	A	T	C	A	G	T	G	T	G	T	A	A	C	A	T	T	A	G	G	G	A	G	G	A	C	T	T	G	A	A	A	G	A	G	C	C	A	C
1795	Delta	>115376|29662|29890	C	A	A	T	C	T	T	T	A	A	T	C	A	G	T	G	T	G	T	A	A	C	A	T	T	A	G	G	G	A	G	G	A	C	T	T	G	A	A	A	G	A	G	C	C	A	C
1796	Delta	>115373|29662|29890	C	A	A	T	C	T	T	T	A	A	T	C	A	G	T	G	T	G	T	A	A	C	A	T	T	A	G	G	G	A	G	G	A	C	T	T	G	A	A	A	G	A	G	C	C	A	C
1797	Delta	>115207|29659|29887	C	A	A	T	C	T	T	T	A	A	T	C	A	G	T	G	T	G	T	A	A	C	A	T	T	A	G	G	G	A	G	G	A	C	T	T	G	A	A	A	G	A	G	C	C	A	C
1798	Delta	>115206|29660|29888	C	A	A	T	C	T	T	T	A	A	T	C	A	G	T	G	T	G	T	A	A	C	A	T	T	A	G	G	G	A	G	G	A	C	T	T	G	A	A	A	G	A	G	C	C	A	C
1799	Delta	>115203|29662|29890	C	A	A	T	C	T	T	T	A	A	T	C	A	G	T	G	T	G	T	A	A	C	A	T	T	A	G	G	G	A	G	G	A	C	T	T	G	A	A	A	G	A	G	C	C	A	C
1800	Delta	>115187|29662|29890	C	A	A	T	C	T	T	T	A	A	T	C	A	G	T	G	T	G	T	A	A	C	A	T	T	A	G	G	G	A	G	G	A	C	T	T	G	A	A	A	G	A	G	C	C	A	C
1801	Delta	>115185|29661|29889	C	A	A	T	C	T	T	T	A	A	T	C	A	G	T	G	T	G	T	A	A	C	A	T	T	A	G	G	G	A	G	G	A	C	T	T	G	A	A	A	G	A	G	C	C	A	C
1802	Delta	>115175|29662|29890	C	A	A	T	C	T	T	T	A	A	T	C	A	G	T	G	T	G	T	A	A	C	A	T	T	A	G	G	G	A	G	G	A	C	T	T	G	A	A	A	G	A	G	C	C	A	C
1803	Delta	>115174|29653|29881	C	A	A	T	C	T	T	T	A	A	T	C	A	G	T	G	T	G	T	A	A	C	A	T	T	A	G	G	G	A	G	G	A	C	T	T	G	A	A	A	G	A	G	C	C	A	C
1804	Delta	>115173|29624|29852	C	A	A	T	C	T	T	T	A	A	T	C	A	G	T	G	T	G	T	A	A	C	A	T	T	A	G	G	G	A	G	G	A	C	T	T	G	A	A	A	G	A	G	C	C	A	C
1805	Delta	>115172|29660|29888	C	A	A	T	C	T	T	T	A	A	T	C	A	G	T	G	T	G	T	A	A	C	A	T	T	A	G	G	G	A	G	G	A	C	T	T	G	A	A	A	G	A	G	C	C	A	C
1806	Delta	>115171|29662|29890	C	A	A	T	C	T	T	T	A	A	T	C	A	G	T	G	T	G	T	A	A	C	A	T	T	A	G	G	G	A	G	G	A	C	T	T	G	A	A	A	G	A	G	C	C	A	C
1807	Delta	>115170|29661|29889	C	A	A	T	C	T	T	T	A	A	T	C	A	G	T	G	T	G	T	A	A	C	A	T	T	A	G	G	G	A	G	G	A	C	T	T	G	A	A	A	G	A	G	C	C	A	C
1808	Delta	>115168|29662|29890	C	A	A	T	C	T	T	T	A	A	T	C	A	G	T	G	T	G	T	A	A	C	A	T	T	A	G	G	G	A	G	G	A	C	T	T	G	A	A	A	G	A	G	C	C	A	C
1809	Delta	>115166|29654|29882	C	A	A	T	C	T	T	T	A	A	T	C	A	G	T	G	T	G	T	A	A	C	A	T	T	A	G	G	G	A	G	G	A	C	T	T	G	A	A	A	G	A	G	C	C	A	C
1810	Delta	>115140|29662|29890	C	A	A	T	C	T	T	T	A	A	T	C	A	G	T	G	T	G	T	A	A	C	A	T	T	A	G	G	G	A	G	G	A	C	T	T	G	A	A	A	G	A	G	C	C	A	C
1811	Delta	>115139|29662|29890	C	A	A	T	C	T	T	T	A	A	T	C	A	G	T	G	T	G	T	A	A	C	A	T	T	A	G	G	G	A	G	G	A	C	T	T	G	A	A	A	G	A	G	C	C	A	C
1812	Delta	>115138|29662|29890	C	A	A	T	C	T	T	T	A	A	T	C	A	G	T	G	T	G	T	A	A	C	A	T	T	A	G	G	G	A	G	G	A	C	T	T	G	A	A	A	G	A	G	C	C	A	C
1813	Delta	>115134|29662|29890	C	A	A	T	C	T	T	T	A	A	T	C	A	G	T	G	T	G	T	A	A	C	A	T	T	A	G	G	G	A	G	G	A	C	T	T	G	A	A	A	G	A	G	C	C	A	C
1814	Delta	>115131|29662|29890	C	A	A	T	C	T	T	T	A	A	T	C	A	G	T	G	T	G	T	A	A	C	A	T	T	A	G	G	G	A	G	G	A	C	T	T	G	A	A	A	G	A	G	C	C	A	C
1815	Delta	>115130|29662|29890	C	A	A	T	C	T	T	T	A	A	T	C	A	G	T	G	T	G	T	A	A	C	A	T	T	A	G	G	G	A	G	G	A	C	T	T	G	A	A	A	G	A	G	C	C	A	C
1816	Delta	>115127|29662|29890	C	A	A	T	C	T	T	T	A	A	T	C	A	G	T	G	T	G	T	A	A	C	A	T	T	A	G	G	G	A	G	G	A	C	T	T	G	A	A	A	G	A	G	C	C	A	C
1817	Delta	>115126|29662|29890	C	A	A	T	C	T	T	T	A	A	T	C	A	G	T	G	T	G	T	A	A	C	A	T	T	A	G	G	G	A	G	G	A	C	T	T	G	A	A	A	G	A	G	C	C	A	C
1818	Delta	>115113|29662|29890	C	A	A	T	C	T	T	T	A	A	T	C	A	G	T	G	T	G	T	A	A	C	A	T	T	A	G	G	G	A	G	G	A	C	T	T	G	A	A	A	G	A	G	C	C	A	C
1819	Delta	>115112|29663|29891	C	A	A	T	C	T	T	T	A	A	T	C	A	G	T	G	T	G	T	A	A	C	A	T	T	A	G	G	G	A	G	G	A	C	T	T	G	A	A	A	G	A	G	C	C	A	C
1820	Delta	>115111|29662|29890	C	A	A	T	C	T	T	T	A	A	T	C	A	G	T	G	T	G	T	A	A	C	A	T	T	A	G	G	G	A	G	G	A	C	T	T	G	A	A	A	G	A	G	C	C	A	C
1821	Delta	>114912|29663|29891	C	A	A	T	C	T	T	T	A	A	T	C	A	G	T	G	T	G	T	A	A	C	A	T	T	A	G	G	G	A	G	G	A	C	T	T	G	A	A	A	G	A	G	C	C	A	C
1822	Delta	>114909|29663|29891	C	A	A	T	C	T	T	T	A	A	T	C	A	G	T	G	T	G	T	A	A	C	A	T	T	A	G	G	G	A	G	G	A	C	T	T	G	A	A	A	G	A	G	C	C	A	C
1823	Delta	>114844|29663|29891	C	A	A	T	C	T	T	T	A	A	T	C	A	G	T	G	T	G	T	A	A	C	A	T	T	A	G	G	G	A	G	G	A	C	T	T	G	A	A	A	G	A	G	C	C	A	C
1824	Delta	>114843|29663|29891	C	A	A	T	C	T	T	T	A	A	T	C	A	G	T	G	T	G	T	A	A	C	A	T	T	A	G	G	G	A	G	G	A	C	T	T	G	A	A	A	G	A	G	C	C	A	C
1825	Delta	>114842|29663|29891	C	A	A	T	C	T	T	T	A	A	T	C	A	G	T	G	T	G	T	A	A	C	A	T	T	A	G	G	G	A	G	G	A	C	T	T	G	A	A	A	G	A	G	C	C	A	C
1826	Delta	>114841|29663|29891	C	A	A	T	C	T	T	T	A	A	T	C	A	G	T	G	T	G	T	A	A	C	A	T	T	A	G	G	G	A	G	G	A	C	T	T	G	A	A	A	G	A	G	C	C	A	C
1827	Delta	>114840|29663|29891	C	A	A	T	C	T	T	T	A	A	T	C	A	G	T	G	T	G	T	A	A	C	A	T	T	A	G	G	G	A	G	G	A	C	T	T	G	A	A	A	G	A	G	C	C	A	C
1828	Delta	>114839|29658|29886	C	A	A	T	C	T	T	T	A	A	T	C	A	G	T	G	T	G	T	A	A	C	A	T	T	A	G	G	G	A	G	G	A	C	T	T	G	A	A	A	G	A	G	C	C	A	C
1829	Delta	>114838|29646|29874	C	A	A	T	C	T	T	T	A	A	T	C	A	G	T	G	T	G	T	A	A	C	A	T	T	A	G	G	G	A	G	G	A	C	T	T	G	A	A	A	G	A	G	C	C	A	C
1830	Delta	>114837|29641|29869	C	A	A	T	C	T	T	T	A	A	T	C	A	G	T	G	T	G	T	A	A	C	A	T	T	A	G	G	G	A	G	G	A	C	T	T	G	A	A	A	G	A	G	C	C	A	C
1831	Delta	>114819|29662|29890	C	A	A	T	C	T	T	T	A	A	T	C	A	G	T	G	T	G	T	A	A	C	A	T	T	A	G	G	G	A	G	G	A	C	T	T	G	A	A	A	G	A	G	C	C	A	C
1832	Delta	>114818|29675|29903	C	A	A	T	C	T	T	T	A	A	T	C	A	G	T	G	T	G	T	A	A	C	A	T	T	A	G	G	G	A	G	G	A	C	T	T	G	A	A	A	G	A	G	C	C	A	C
1833	Delta	>114817|29656|29884	C	A	A	T	C	T	T	T	A	A	T	C	A	G	T	G	T	G	T	A	A	C	A	T	T	A	G	G	G	A	G	G	A	C	T	T	G	A	A	A	G	A	G	C	C	A	C
1834	Delta	>114816|29662|29890	C	A	A	T	C	T	T	T	A	A	T	C	A	G	T	G	T	G	T	A	A	C	A	T	T	A	G	G	G	A	G	G	A	C	T	T	G	A	A	A	G	A	G	C	C	A	C
1835	Delta	>114815|29662|29890	C	A	A	T	C	T	T	T	A	A	T	C	A	G	T	G	T	G	T	A	A	C	A	T	T	A	G	G	G	A	G	G	A	C	T	T	G	A	A	A	G	A	G	C	C	A	C
1836	Delta	>114814|29662|29890	C	A	A	T	C	T	T	T	A	A	T	C	A	G	T	G	T	G	T	A	A	C	A	T	T	A	G	G	G	A	G	G	A	C	T	T	G	A	A	A	G	A	G	C	C	A	C
1837	Delta	>114813|29662|29890	C	A	A	T	C	T	T	T	A	A	T	C	A	G	T	G	T	G	T	A	A	C	A	T	T	A	G	G	G	A	G	G	A	C	T	T	G	A	A	A	G	A	G	C	C	A	C
1838	Delta	>114811|29662|29890	C	A	A	T	C	T	T	T	A	A	T	C	A	G	T	G	T	G	T	A	A	C	A	T	T	A	G	G	G	A	G	G	A	C	T	T	G	A	A	A	G	A	G	C	C	A	C
1839	Delta	>114810|29662|29890	C	A	A	T	C	T	T	T	A	A	T	C	A	G	T	G	T	G	T	A	A	C	A	T	T	A	G	G	G	A	G	G	A	C	T	T	G	A	A	A	G	A	G	C	C	A	C
1840	Delta	>114809|29662|29890	C	A	A	T	C	T	T	T	A	A	T	C	A	G	T	G	T	G	T	A	A	C	A	T	T	A	G	G	G	A	G	G	A	C	T	T	G	A	A	A	G	A	G	C	C	A	C
1841	Delta	>114807|29671|29899	C	A	A	T	C	T	T	T	A	A	T	C	A	G	T	G	T	G	T	A	A	C	A	T	T	A	G	G	G	A	G	G	A	C	T	T	G	A	A	A	G	A	G	C	C	A	C
1842	Delta	>114806|29662|29890	C	A	A	T	C	T	T	T	A	A	T	C	A	G	T	G	T	G	T	A	A	C	A	T	T	A	G	G	G	A	G	G	A	C	T	T	G	A	A	A	G	A	G	C	C	A	C
1843	Delta	>114805|29662|29890	C	A	A	T	C	T	T	T	A	A	T	C	A	G	T	G	T	G	T	A	A	C	A	T	T	A	G	G	G	A	G	G	A	C	T	T	G	A	A	A	G	A	G	C	C	A	C
1844	Delta	>114804|29662|29890	C	A	A	T	C	T	T	T	A	A	T	C	A	G	T	G	T	G	T	A	A	C	A	T	T	A	G	G	G	A	G	G	A	C	T	T	G	A	A	A	G	A	G	C	C	A	C
1845	Delta	>114803|29662|29890	C	A	A	T	C	T	T	T	A	A	T	C	A	G	T	G	T	G	T	A	A	C	A	T	T	A	G	G	G	A	G	G	A	C	T	T	G	A	A	A	G	A	G	C	C	A	C
1846	Delta	>114785|29662|29890	C	A	A	T	C	T	T	T	A	A	T	C	A	G	T	G	T	G	T	A	A	C	A	T	T	A	G	G	G	A	G	G	A	C	T	T	G	A	A	A	G	A	G	C	C	A	C
1847	Delta	>114782|29662|29890	C	A	A	T	C	T	T	T	A	A	T	C	A	G	T	G	T	G	T	A	A	C	A	T	T	A	G	G	G	A	G	G	A	C	T	T	G	A	A	A	G	A	G	C	C	A	C
1848	Delta	>114770|29662|29890	C	A	A	T	C	T	T	T	A	A	T	C	A	G	T	G	T	G	T	A	A	C	A	T	T	A	G	G	G	A	G	G	A	C	T	T	G	A	A	A	G	A	G	C	C	A	C
1849	Delta	>114768|29663|29891	C	A	A	T	C	T	T	T	A	A	T	C	A	G	T	G	T	G	T	A	A	C	A	T	T	A	G	G	G	A	G	G	A	C	T	T	G	A	A	A	G	A	G	C	C	A	C
1850	Delta	>114730|29663|29891	C	A	A	T	C	T	T	T	A	A	T	C	A	G	T	G	T	G	T	A	A	C	A	T	T	A	G	G	G	A	G	G	A	C	T	T	G	A	A	A	G	A	G	C	C	A	C
1851	Delta	>114729|29663|29891	C	A	A	T	C	T	T	T	A	A	T	C	A	G	T	G	T	G	T	A	A	C	A	T	T	A	G	G	G	A	G	G	A	C	T	T	G	A	A	A	G	A	G	C	C	A	C
1852	Delta	>114728|29667|29895	C	A	A	T	C	T	T	T	A	A	T	C	A	G	T	G	T	G	T	A	A	C	A	T	T	A	G	G	G	A	G	G	A	C	T	T	G	A	A	A	G	A	G	C	C	A	C
1853	Delta	>114709|29662|29890	C	A	A	T	C	T	T	T	A	A	T	C	A	G	T	G	T	G	T	A	A	C	A	T	T	A	G	G	G	A	G	G	A	C	T	T	G	A	A	A	G	A	G	C	C	A	C
1854	Delta	>114637|29662|29890	C	A	A	T	C	T	T	T	A	A	T	C	A	G	T	G	T	G	T	A	A	C	A	T	T	A	G	G	G	A	G	G	A	C	T	T	G	A	A	A	G	A	G	C	C	A	C
1855	Delta	>114623|29662|29890	C	A	A	T	C	T	T	T	A	A	T	C	A	G	T	G	T	G	T	A	A	C	A	T	T	A	G	G	G	A	G	G	A	C	T	T	G	A	A	A	G	A	G	C	C	A	C
1856	Delta	>114241|29662|29890	C	A	A	T	C	T	T	T	A	A	T	C	A	G	T	G	T	G	T	A	A	C	A	T	T	A	G	G	G	A	G	G	A	C	T	T	G	A	A	A	G	A	G	C	C	A	C
1857	Delta	>114240|29662|29890	C	A	A	T	C	T	T	T	A	A	T	C	A	G	T	G	T	G	T	A	A	C	A	T	T	A	G	G	G	A	G	G	A	C	T	T	G	A	A	A	G	A	G	C	C	A	C
1858	Delta	>114238|29662|29890	C	A	A	T	C	T	T	T	A	A	T	C	A	G	T	G	T	G	T	A	A	C	A	T	T	A	G	G	G	A	G	G	A	C	T	T	G	A	A	A	G	A	G	C	C	A	C
1859	Delta	>114237|29662|29890	C	A	A	T	C	T	T	T	A	A	T	C	A	G	T	G	T	G	T	A	A	C	A	T	T	A	G	G	G	A	G	G	A	C	T	T	G	A	A	A	G	A	G	C	C	A	C
1860	Delta	>114236|29662|29890	C	A	A	T	C	T	T	T	A	A	T	C	A	G	T	G	T	G	T	A	A	C	A	T	T	A	G	G	G	A	G	G	A	C	T	T	G	A	A	A	G	A	G	C	C	A	C
1861	Delta	>114234|29662|29890	C	A	A	T	C	T	T	T	A	A	T	C	A	G	T	G	T	G	T	A	A	C	A	T	T	A	G	G	G	A	G	G	A	C	T	T	G	A	A	A	G	A	G	C	C	A	C
1862	Delta	>114233|29662|29890	C	A	A	T	C	T	T	T	A	A	T	C	A	G	T	G	T	G	T	A	A	C	A	T	T	A	G	G	G	A	G	G	A	C	T	T	G	A	A	A	G	A	G	C	C	A	C
1863	Delta	>114232|29662|29890	C	A	A	T	C	T	T	T	A	A	T	C	A	G	T	G	T	G	T	A	A	C	A	T	T	A	G	G	G	A	G	G	A	C	T	T	G	A	A	A	G	A	G	C	C	A	C
1864	Delta	>114231|29662|29890	C	A	A	T	C	T	T	T	A	A	T	C	A	G	T	G	T	G	T	A	A	C	A	T	T	A	G	G	G	A	G	G	A	C	T	T	G	A	A	A	G	A	G	C	C	A	C
1865	Delta	>114230|29662|29890	C	A	A	T	C	T	T	T	A	A	T	C	A	G	T	G	T	G	T	A	A	C	A	T	T	A	G	G	G	A	G	G	A	C	T	T	G	A	A	A	G	A	G	C	C	A	C
1866	Delta	>114228|29677|29905	C	A	A	T	C	T	T	T	A	A	T	C	A	G	T	G	T	G	T	A	A	C	A	T	T	A	G	G	G	A	G	G	A	C	T	T	G	A	A	A	G	A	G	C	C	A	C
1867	Delta	>114227|29662|29890	C	A	A	T	C	T	T	T	A	A	T	C	A	G	T	G	T	G	T	A	A	C	A	T	T	A	G	G	G	A	G	G	A	C	T	T	G	A	A	A	G	A	G	C	C	A	C
1868	Delta	>114226|29662|29890	C	A	A	T	C	T	T	T	A	A	T	C	A	G	T	G	T	G	T	A	A	C	A	T	T	A	G	G	G	A	G	G	A	C	T	T	G	A	A	A	G	A	G	C	C	A	C
1869	Delta	>114225|29662|29890	C	A	A	T	C	T	T	T	A	A	T	C	A	G	T	G	T	G	T	A	A	C	A	T	T	A	G	G	G	A	G	G	A	C	T	T	G	A	A	A	G	A	G	C	C	A	C
1870	Delta	>114224|29662|29890	C	A	A	T	C	T	T	T	A	A	T	C	A	G	T	G	T	G	T	A	A	C	A	T	T	A	G	G	G	A	G	G	A	C	T	T	G	A	A	A	G	A	G	C	C	A	C
1871	Delta	>114223|29662|29890	C	A	A	T	C	T	T	T	A	A	T	C	A	G	T	G	T	G	T	A	A	C	A	T	T	A	G	G	G	A	G	G	A	C	T	T	G	A	A	A	G	A	G	C	C	A	C
1872	Delta	>114222|29662|29890	C	A	A	T	C	T	T	T	A	A	T	C	A	G	T	G	T	G	T	A	A	C	A	T	T	A	G	G	G	A	G	G	A	C	T	T	G	A	A	A	G	A	G	C	C	A	C
1873	Delta	>114221|29662|29890	C	A	A	T	C	T	T	T	A	A	T	C	A	G	T	G	T	G	T	A	A	C	A	T	T	A	G	G	G	A	G	G	A	C	T	T	G	A	A	A	G	A	G	C	C	A	C
1874	Delta	>114220|29662|29890	C	A	A	T	C	T	T	T	A	A	T	C	A	G	T	G	T	G	T	A	A	C	A	T	T	A	G	G	G	A	G	G	A	C	T	T	G	A	A	A	G	A	G	C	C	A	C
1875	Delta	>114218|29662|29890	C	A	A	T	C	T	T	T	A	A	T	C	A	G	T	G	T	G	T	A	A	C	A	T	T	A	G	G	G	A	G	G	A	C	T	T	G	A	A	A	G	A	G	C	C	A	C
1876	Delta	>114217|29662|29890	C	A	A	T	C	T	T	T	A	A	T	C	A	G	T	G	T	G	T	A	A	C	A	T	T	A	G	G	G	A	G	G	A	C	T	T	G	A	A	A	G	A	G	C	C	A	C
1877	Delta	>114205|29679|29907	C	A	A	T	C	T	T	T	A	A	T	C	A	G	T	G	T	G	T	A	A	C	A	T	T	A	G	G	G	A	G	G	A	C	T	T	G	A	A	A	G	A	G	C	C	A	C
1878	Delta	>114204|29663|29891	C	A	A	T	C	T	T	T	A	A	T	C	A	G	T	G	T	G	T	A	A	C	A	T	T	A	G	G	G	A	G	G	A	C	T	T	G	A	A	A	G	A	G	C	C	A	C
1879	Delta	>114202|29664|29892	C	A	A	T	C	T	T	T	A	A	T	C	A	G	T	G	T	G	T	A	A	C	A	T	T	A	G	G	G	A	G	G	A	C	T	T	G	A	A	A	G	A	G	C	C	A	C
1880	Delta	>114200|29664|29892	C	A	A	T	C	T	T	T	A	A	T	C	A	G	T	G	T	G	T	A	A	C	A	T	T	A	G	G	G	A	G	G	A	C	T	T	G	A	A	A	G	A	G	C	C	A	C
1881	Delta	>114199|29654|29882	C	A	A	T	C	T	T	T	A	A	T	C	A	G	T	G	T	G	T	A	A	C	A	T	T	A	G	G	G	A	G	G	A	C	T	T	G	A	A	A	G	A	G	C	C	A	C
1882	Delta	>114198|29645|29873	C	A	A	T	C	T	T	T	A	A	T	C	A	G	T	G	T	G	T	A	A	C	A	T	T	A	G	G	G	A	G	G	A	C	T	T	G	A	A	A	G	A	G	C	C	A	C
1883	Delta	>114197|29661|29889	C	A	A	T	C	T	T	T	A	A	T	C	A	G	T	G	T	G	T	A	A	C	A	T	T	A	G	G	G	A	G	G	A	C	T	T	G	A	A	A	G	A	G	C	C	A	C
1884	Delta	>113786|29669|29897	C	A	A	T	C	T	T	T	A	A	T	C	A	G	T	G	T	G	T	A	A	C	A	T	T	A	G	G	G	A	G	G	A	C	T	T	G	A	A	A	G	A	G	C	C	A	C
1885	Delta	>113225|29669|29897	C	A	A	T	C	T	T	T	A	A	T	C	A	G	T	G	T	G	T	A	A	C	A	T	T	A	G	G	G	A	G	G	A	C	T	T	G	A	A	A	G	A	G	C	C	A	C
1886	Delta	>113224|29669|29897	C	A	A	T	C	T	T	T	A	A	T	C	A	G	T	G	T	G	T	A	A	C	A	T	T	A	G	G	G	A	G	G	A	C	T	T	G	A	A	A	G	A	G	C	C	A	C
1887	Delta	>112811|29658|29886	C	A	A	T	C	T	T	T	A	A	T	C	A	G	T	G	T	G	T	A	A	C	A	T	T	A	G	G	G	A	G	G	A	C	T	T	G	A	A	A	G	A	G	C	C	A	C
1888	Delta	>112767|29660|29888	C	A	A	T	C	T	T	T	A	A	T	C	A	G	T	G	T	G	T	A	A	C	A	T	T	A	G	G	G	A	G	G	A	C	T	T	G	A	A	A	G	A	G	C	C	A	C
1889	Delta	>111500|29653|29881	C	A	A	T	C	T	T	T	A	A	T	C	A	G	T	G	T	G	T	A	A	C	A	T	T	A	G	G	G	A	G	G	A	C	T	T	G	A	A	A	G	A	G	C	C	A	C
1890	Delta	>111114|29660|29888	C	A	A	T	C	T	T	T	A	A	T	C	A	G	T	G	T	G	T	A	A	C	A	T	T	A	G	G	G	A	G	G	A	C	T	T	G	A	A	A	G	A	G	C	C	A	C
1891	Delta	>110939|29659|29887	C	A	A	T	C	T	T	T	A	A	T	C	A	G	T	G	T	G	T	A	A	C	A	T	T	A	G	G	G	A	G	G	A	C	T	T	G	A	A	A	G	A	G	C	C	A	C
1892	Delta	>110926|29628|29856	C	A	A	T	C	T	T	T	A	A	T	C	A	G	T	G	T	G	T	A	A	C	A	T	T	A	G	G	G	A	G	G	A	C	T	T	G	A	A	A	G	A	G	C	C	A	C
1893	Delta	>110923|29658|29886	C	A	A	T	C	T	T	T	A	A	T	C	A	G	T	G	T	G	T	A	A	C	A	T	T	A	G	G	G	A	G	G	A	C	T	T	G	A	A	A	G	A	G	C	C	A	C
1894	Delta	>110922|29656|29884	C	A	A	T	C	T	T	T	A	A	T	C	A	G	T	G	T	G	T	A	A	C	A	T	T	A	G	G	G	A	G	G	A	C	T	T	G	A	A	A	G	A	G	C	C	A	C
1895	Delta	>110920|29655|29883	C	A	A	T	C	T	T	T	A	A	T	C	A	G	T	G	T	G	T	A	A	C	A	T	T	A	G	G	G	A	G	G	A	C	T	T	G	A	A	A	G	A	G	C	C	A	C
1896	Delta	>110918|29624|29852	C	A	A	T	C	T	T	T	A	A	T	C	A	G	T	G	T	G	T	A	A	C	A	T	T	A	G	G	G	A	G	G	A	C	T	T	G	A	A	A	G	A	G	C	C	A	C
1897	Delta	>110893|29631|29859	C	A	A	T	C	T	T	T	A	A	T	C	A	G	T	G	T	G	T	A	A	C	A	T	T	A	G	G	G	A	G	G	A	C	T	T	G	A	A	A	G	A	G	C	C	A	C
1898	Delta	>110888|29654|29882	C	A	A	T	C	T	T	T	A	A	T	C	A	G	T	G	T	G	T	A	A	C	A	T	T	A	G	G	G	A	G	G	A	C	T	T	G	A	A	A	G	A	G	C	C	A	C
1899	Delta	>110807|29660|29888	C	A	A	T	C	T	T	T	A	A	T	C	A	G	T	G	T	G	T	A	A	C	A	T	T	A	G	G	G	A	G	G	A	C	T	T	G	A	A	A	G	A	G	C	C	A	C
1900	Delta	>110797|29626|29854	C	A	A	T	C	T	T	T	A	A	T	C	A	G	T	G	T	G	T	A	A	C	A	T	T	A	G	G	G	A	G	G	A	C	T	T	G	A	A	A	G	A	G	C	C	A	C
1901	Delta	>110776|29661|29889	C	A	A	T	C	T	T	T	A	A	T	C	A	G	T	G	T	G	T	A	A	C	A	T	T	A	G	G	G	A	G	G	A	C	T	T	G	A	A	A	G	A	G	C	C	A	C
1902	Delta	>110775|29660|29888	C	A	A	T	C	T	T	T	A	A	T	C	A	G	T	G	T	G	T	A	A	C	A	T	T	A	G	G	G	A	G	G	A	C	T	T	G	A	A	A	G	A	G	C	C	A	C
1903	Delta	>110769|29660|29888	C	A	A	T	C	T	T	T	A	A	T	C	A	G	T	G	T	G	T	A	A	C	A	T	T	A	G	G	G	A	G	G	A	C	T	T	G	A	A	A	G	A	G	C	C	A	C
1904	Delta	>110764|29651|29879	C	A	A	T	C	T	T	T	A	A	T	C	A	G	T	G	T	G	T	A	A	C	A	T	T	A	G	G	G	A	G	G	A	C	T	T	G	A	A	A	G	A	G	C	C	A	C
1905	Delta	>110662|29625|29853	C	A	A	T	C	T	T	T	A	A	T	C	A	G	T	G	T	G	T	A	A	C	A	T	T	A	G	G	G	A	G	G	A	C	T	T	G	A	A	A	G	A	G	C	C	A	C
1906	Delta	>110660|29651|29879	C	A	A	T	C	T	T	T	A	A	T	C	A	G	T	G	T	G	T	A	A	C	A	T	T	A	G	G	G	A	G	G	A	C	T	T	G	A	A	A	G	A	G	C	C	A	C
1907	Delta	>110457|29654|29882	C	A	A	T	C	T	T	T	A	A	T	C	A	G	T	G	T	G	T	A	A	C	A	T	T	A	G	G	G	A	G	G	A	C	T	T	G	A	A	A	G	A	G	C	C	A	C
1908	Delta	>110456|29655|29883	C	A	A	T	C	T	T	T	A	A	T	C	A	G	T	G	T	G	T	A	A	C	A	T	T	A	G	G	G	A	G	G	A	C	T	T	G	A	A	A	G	A	G	C	C	A	C
1909	Delta	>110455|29654|29882	C	A	A	T	C	T	T	T	A	A	T	C	A	G	T	G	T	G	T	A	A	C	A	T	T	A	G	G	G	A	G	G	A	C	T	T	G	A	A	A	G	A	G	C	C	A	C
1910	Delta	>110454|29651|29879	C	A	A	T	C	T	T	T	A	A	T	C	A	G	T	G	T	G	T	A	A	C	A	T	T	A	G	G	G	A	G	G	A	C	T	T	G	A	A	A	G	A	G	C	C	A	C
1911	Delta	>110453|29651|29879	C	A	A	T	C	T	T	T	A	A	T	C	A	G	T	G	T	G	T	A	A	C	A	T	T	A	G	G	G	A	G	G	A	C	T	T	G	A	A	A	G	A	G	C	C	A	C
1912	Delta	>110450|29653|29881	C	A	A	T	C	T	T	T	A	A	T	C	A	G	T	G	T	G	T	A	A	C	A	T	T	A	G	G	G	A	G	G	A	C	T	T	G	A	A	A	G	A	G	C	C	A	C
1913	Delta	>110449|29652|29880	C	A	A	T	C	T	T	T	A	A	T	C	A	G	T	G	T	G	T	A	A	C	A	T	T	A	G	G	G	A	G	G	A	C	T	T	G	A	A	A	G	A	G	C	C	A	C
1914	Delta	>110447|29654|29882	C	A	A	T	C	T	T	T	A	A	T	C	A	G	T	G	T	G	T	A	A	C	A	T	T	A	G	G	G	A	G	G	A	C	T	T	G	A	A	A	G	A	G	C	C	A	C
1915	Delta	>110446|29652|29880	C	A	A	T	C	T	T	T	A	A	T	C	A	G	T	G	T	G	T	A	A	C	A	T	T	A	G	G	G	A	G	G	A	C	T	T	G	A	A	A	G	A	G	C	C	A	C
1916	Delta	>110431|29612|29840	C	A	A	T	C	T	T	T	A	A	T	C	A	G	T	G	T	G	T	A	A	C	A	T	T	A	G	G	G	A	G	G	A	C	T	T	G	A	A	A	G	A	G	C	C	A	C
1917	Delta	>110419|29628|29856	C	A	A	T	C	T	T	T	A	A	T	C	A	G	T	G	T	G	T	A	A	C	A	T	T	A	G	G	G	A	G	G	A	C	T	T	G	A	A	A	G	A	G	C	C	A	C
1918	Delta	>110404|29612|29840	C	A	A	T	C	T	T	T	A	A	T	C	A	G	T	G	T	G	T	A	A	C	A	T	T	A	G	G	G	A	G	G	A	C	T	T	G	A	A	A	G	A	G	C	C	A	C
1919	Delta	>110400|29629|29857	C	A	A	T	C	T	T	T	A	A	T	C	A	G	T	G	T	G	T	A	A	C	A	T	T	A	G	G	G	A	G	G	A	C	T	T	G	A	A	A	G	A	G	C	C	A	C
1920	Delta	>110397|29612|29840	C	A	A	T	C	T	T	T	A	A	T	C	A	G	T	G	T	G	T	A	A	C	A	T	T	A	G	G	G	A	G	G	A	C	T	T	G	A	A	A	G	A	G	C	C	A	C
1921	Delta	>110396|29634|29862	C	A	A	T	C	T	T	T	A	A	T	C	A	G	T	G	T	G	T	A	A	C	A	T	T	A	G	G	G	A	G	G	A	C	T	T	G	A	A	A	G	A	G	C	C	A	C
1922	Delta	>110393|29653|29881	C	A	A	T	C	T	T	T	A	A	T	C	A	G	T	G	T	G	T	A	A	C	A	T	T	A	G	G	G	A	G	G	A	C	T	T	G	A	A	A	G	A	G	C	C	A	C
1923	Delta	>110392|29654|29882	C	A	A	T	C	T	T	T	A	A	T	C	A	G	T	G	T	G	T	A	A	C	A	T	T	A	G	G	G	A	G	G	A	C	T	T	G	A	A	A	G	A	G	C	C	A	C
1924	Delta	>110391|29658|29886	C	A	A	T	C	T	T	T	A	A	T	C	A	G	T	G	T	G	T	A	A	C	A	T	T	A	G	G	G	A	G	G	A	C	T	T	G	A	A	A	G	A	G	C	C	A	C
1925	Delta	>110390|29652|29880	C	A	A	T	C	T	T	T	A	A	T	C	A	G	T	G	T	G	T	A	A	C	A	T	T	A	G	G	G	A	G	G	A	C	T	T	G	A	A	A	G	A	G	C	C	A	C
1926	Delta	>110388|29652|29880	C	A	A	T	C	T	T	T	A	A	T	C	A	G	T	G	T	G	T	A	A	C	A	T	T	A	G	G	G	A	G	G	A	C	T	T	G	A	A	A	G	A	G	C	C	A	C
1927	Delta	>110387|29655|29883	C	A	A	T	C	T	T	T	A	A	T	C	A	G	T	G	T	G	T	A	A	C	A	T	T	A	G	G	G	A	G	G	A	C	T	T	G	A	A	A	G	A	G	C	C	A	C
1928	Delta	>110386|29652|29880	C	A	A	T	C	T	T	T	A	A	T	C	A	G	T	G	T	G	T	A	A	C	A	T	T	A	G	G	G	A	G	G	A	C	T	T	G	A	A	A	G	A	G	C	C	A	C
1929	Delta	>110385|29655|29883	C	A	A	T	C	T	T	T	A	A	T	C	A	G	T	G	T	G	T	A	A	C	A	T	T	A	G	G	G	A	G	G	A	C	T	T	G	A	A	A	G	A	G	C	C	A	C
1930	Delta	>110384|29662|29890	C	A	A	T	C	T	T	T	A	A	T	C	A	G	T	G	T	G	T	A	A	C	A	T	T	A	G	G	G	A	G	G	A	C	T	T	G	A	A	A	G	A	G	C	C	A	C
1931	Delta	>110383|29652|29880	C	A	A	T	C	T	T	T	A	A	T	C	A	G	T	G	T	G	T	A	A	C	A	T	T	A	G	G	G	A	G	G	A	C	T	T	G	A	A	A	G	A	G	C	C	A	C
1932	Delta	>110382|29652|29880	C	A	A	T	C	T	T	T	A	A	T	C	A	G	T	G	T	G	T	A	A	C	A	T	T	A	G	G	G	A	G	G	A	C	T	T	G	A	A	A	G	A	G	C	C	A	C
1933	Delta	>110381|29654|29882	C	A	A	T	C	T	T	T	A	A	T	C	A	G	T	G	T	G	T	A	A	C	A	T	T	A	G	G	G	A	G	G	A	C	T	T	G	A	A	A	G	A	G	C	C	A	C
1934	Delta	>110344|29658|29886	C	A	A	T	C	T	T	T	A	A	T	C	A	G	T	G	T	G	T	A	A	C	A	T	T	A	G	G	G	A	G	G	A	C	T	T	G	A	A	A	G	A	G	C	C	A	C
1935	Delta	>110335|29660|29888	C	A	A	T	C	T	T	T	A	A	T	C	A	G	T	G	T	G	T	A	A	C	A	T	T	A	G	G	G	A	G	G	A	C	T	T	G	A	A	A	G	A	G	C	C	A	C
1936	Delta	>110332|29626|29854	C	A	A	T	C	T	T	T	A	A	T	C	A	G	T	G	T	G	T	A	A	C	A	T	T	A	G	G	G	A	G	G	A	C	T	T	G	A	A	A	G	A	G	C	C	A	C
1937	Delta	>109878|29657|29885	C	A	A	T	C	T	T	T	A	A	T	C	A	G	T	G	T	G	T	A	A	C	A	T	T	A	G	G	G	A	G	G	A	C	T	T	G	A	A	A	G	A	G	C	C	A	C
1938	Delta	>109683|29625|29853	C	A	A	T	C	T	T	T	A	A	T	C	A	G	T	G	T	G	T	A	A	C	A	T	T	A	G	G	G	A	G	G	A	C	T	T	G	A	A	A	G	A	G	C	C	A	C
1939	Delta	>109047|29658|29886	C	A	A	T	C	T	T	T	A	A	T	C	A	G	T	G	T	G	T	A	A	C	A	T	T	A	G	G	G	A	G	G	A	C	T	T	G	A	A	A	G	A	G	C	C	A	C
1940	Delta	>109039|29642|29870	C	A	A	T	C	T	T	T	A	A	T	C	A	G	T	G	T	G	T	A	A	C	A	T	T	A	G	G	G	A	G	G	A	C	T	T	G	A	A	A	G	A	G	C	C	A	C
1941	Delta	>109026|29660|29888	C	A	A	T	C	T	T	T	A	A	T	C	A	G	T	G	T	G	T	A	A	C	A	T	T	A	G	G	G	A	G	G	A	C	T	T	G	A	A	A	G	A	G	C	C	A	C
1942	Delta	>108964|29646|29874	C	A	A	T	C	T	T	T	A	A	T	C	A	G	T	G	T	G	T	A	A	C	A	T	T	A	G	G	G	A	G	G	A	C	T	T	G	A	A	A	G	A	G	C	C	A	C
1943	Delta	>108943|29659|29887	C	A	A	T	C	T	T	T	A	A	T	C	A	G	T	G	T	G	T	A	A	C	A	T	T	A	G	G	G	A	G	G	A	C	T	T	G	A	A	A	G	A	G	C	C	A	C
1944	Delta	>108851|29658|29886	C	A	A	T	C	T	T	T	A	A	T	C	A	G	T	G	T	G	T	A	A	C	A	T	T	A	G	G	G	A	G	G	A	C	T	T	G	A	A	A	G	A	G	C	C	A	C
1945	Delta	>108837|29660|29888	C	A	A	T	C	T	T	T	A	A	T	C	A	G	T	G	T	G	T	A	A	C	A	T	T	A	G	G	G	A	G	G	A	C	T	T	G	A	A	A	G	A	G	C	C	A	C
1946	Delta	>108826|29661|29889	C	A	A	T	C	T	T	T	A	A	T	C	A	G	T	G	T	G	T	A	A	C	A	T	T	A	G	G	G	A	G	G	A	C	T	T	G	A	A	A	G	A	G	C	C	A	C
1947	Delta	>108825|29662|29890	C	A	A	T	C	T	T	T	A	A	T	C	A	G	T	G	T	G	T	A	A	C	A	T	T	A	G	G	G	A	G	G	A	C	T	T	G	A	A	A	G	A	G	C	C	A	C
1948	Delta	>108818|29658|29886	C	A	A	T	C	T	T	T	A	A	T	C	A	G	T	G	T	G	T	A	A	C	A	T	T	A	G	G	G	A	G	G	A	C	T	T	G	A	A	A	G	A	G	C	C	A	C
1949	Delta	>108817|29660|29888	C	A	A	T	C	T	T	T	A	A	T	C	A	G	T	G	T	G	T	A	A	C	A	T	T	A	G	G	G	A	G	G	A	C	T	T	G	A	A	A	G	A	G	C	C	A	C
1950	Delta	>108808|29646|29874	C	A	A	T	C	T	T	T	A	A	T	C	A	G	T	G	T	G	T	A	A	C	A	T	T	A	G	G	G	A	G	G	A	C	T	T	G	A	A	A	G	A	G	C	C	A	C
1951	Delta	>108514|29661|29889	C	A	A	T	C	T	T	T	A	A	T	C	A	G	T	G	T	G	T	A	A	C	A	T	T	A	G	G	G	A	G	G	A	C	T	T	G	A	A	A	G	A	G	C	C	A	C
1952	Delta	>108503|29661|29889	C	A	A	T	C	T	T	T	A	A	T	C	A	G	T	G	T	G	T	A	A	C	A	T	T	A	G	G	G	A	G	G	A	C	T	T	G	A	A	A	G	A	G	C	C	A	C
1953	Delta	>108502|29658|29886	C	A	A	T	C	T	T	T	A	A	T	C	A	G	T	G	T	G	T	A	A	C	A	T	T	A	G	G	G	A	G	G	A	C	T	T	G	A	A	A	G	A	G	C	C	A	C
1954	Delta	>108501|29654|29882	C	A	A	T	C	T	T	T	A	A	T	C	A	G	T	G	T	G	T	A	A	C	A	T	T	A	G	G	G	A	G	G	A	C	T	T	G	A	A	A	G	A	G	C	C	A	C
1955	Delta	>108500|29626|29854	C	A	A	T	C	T	T	T	A	A	T	C	A	G	T	G	T	G	T	A	A	C	A	T	T	A	G	G	G	A	G	G	A	C	T	T	G	A	A	A	G	A	G	C	C	A	C
1956	Delta	>108499|29660|29888	C	A	A	T	C	T	T	T	A	A	T	C	A	G	T	G	T	G	T	A	A	C	A	T	T	A	G	G	G	A	G	G	A	C	T	T	G	A	A	A	G	A	G	C	C	A	C
1957	Delta	>108496|29659|29887	C	A	A	T	C	T	T	T	A	A	T	C	A	G	T	G	T	G	T	A	A	C	A	T	T	A	G	G	G	A	G	G	A	C	T	T	G	A	A	A	G	A	G	C	C	A	C
1958	Delta	>108495|29658|29886	C	A	A	T	C	T	T	T	A	A	T	C	A	G	T	G	T	G	T	A	A	C	A	T	T	A	G	G	G	A	G	G	A	C	T	T	G	A	A	A	G	A	G	C	C	A	C
1959	Delta	>108493|29658|29886	C	A	A	T	C	T	T	T	A	A	T	C	A	G	T	G	T	G	T	A	A	C	A	T	T	A	G	G	G	A	G	G	A	C	T	T	G	A	A	A	G	A	G	C	C	A	C
1960	Delta	>108487|29660|29888	C	A	A	T	C	T	T	T	A	A	T	C	A	G	T	G	T	G	T	A	A	C	A	T	T	A	G	G	G	A	G	G	A	C	T	T	G	A	A	A	G	A	G	C	C	A	C
1961	Delta	>108483|29660|29888	C	A	A	T	C	T	T	T	A	A	T	C	A	G	T	G	T	G	T	A	A	C	A	T	T	A	G	G	G	A	G	G	A	C	T	T	G	A	A	A	G	A	G	C	C	A	C
1962	Delta	>108477|29660|29888	C	A	A	T	C	T	T	T	A	A	T	C	A	G	T	G	T	G	T	A	A	C	A	T	T	A	G	G	G	A	G	G	A	C	T	T	G	A	A	A	G	A	G	C	C	A	C
1963	Delta	>108383|29649|29877	C	A	A	T	C	T	T	T	A	A	T	C	A	G	T	G	T	G	T	A	A	C	A	T	T	A	G	G	G	A	G	G	A	C	T	T	G	A	A	A	G	A	G	C	C	A	C
1964	Delta	>108317|29643|29871	C	A	A	T	C	T	T	T	A	A	T	C	A	G	T	G	T	G	T	A	A	C	A	T	T	A	G	G	G	A	G	G	A	C	T	T	G	A	A	A	G	A	G	C	C	A	C
1965	Delta	>108315|29643|29871	C	A	A	T	C	T	T	T	A	A	T	C	A	G	T	G	T	G	T	A	A	C	A	T	T	A	G	G	G	A	G	G	A	C	T	T	G	A	A	A	G	A	G	C	C	A	C
1966	Delta	>108297|29660|29888	C	A	A	T	C	T	T	T	A	A	T	C	A	G	T	G	T	G	T	A	A	C	A	T	T	A	G	G	G	A	G	G	A	C	T	T	G	A	A	A	G	A	G	C	C	A	C
1967	Delta	>108269|29653|29881	C	A	A	T	C	T	T	T	A	A	T	C	A	G	T	G	T	G	T	A	A	C	A	T	T	A	G	G	G	A	G	G	A	C	T	T	G	A	A	A	G	A	G	C	C	A	C
1968	Delta	>108241|29660|29888	C	A	A	T	C	T	T	T	A	A	T	C	A	G	T	G	T	G	T	A	A	C	A	T	T	A	G	G	G	A	G	G	A	C	T	T	G	A	A	A	G	A	G	C	C	A	C
1969	Delta	>108172|29660|29888	C	A	A	T	C	T	T	T	A	A	T	C	A	G	T	G	T	G	T	A	A	C	A	T	T	A	G	G	G	A	G	G	A	C	T	T	G	A	A	A	G	A	G	C	C	A	C
1970	Delta	>108162|29658|29886	C	A	A	T	C	T	T	T	A	A	T	C	A	G	T	G	T	G	T	A	A	C	A	T	T	A	G	G	G	A	G	G	A	C	T	T	G	A	A	A	G	A	G	C	C	A	C
1971	Delta	>108154|29662|29890	C	A	A	T	C	T	T	T	A	A	T	C	A	G	T	G	T	G	T	A	A	C	A	T	T	A	G	G	G	A	G	G	A	C	T	T	G	A	A	A	G	A	G	C	C	A	C
1972	Delta	>108151|29661|29889	C	A	A	T	C	T	T	T	A	A	T	C	A	G	T	G	T	G	T	A	A	C	A	T	T	A	G	G	G	A	G	G	A	C	T	T	G	A	A	A	G	A	G	C	C	A	C
1973	Delta	>107918|29662|29890	C	A	A	T	C	T	T	T	A	A	T	C	A	G	T	G	T	G	T	A	A	C	A	T	T	A	G	G	G	A	G	G	A	C	T	T	G	A	A	A	G	A	G	C	C	A	C
1974	Delta	>107870|29658|29886	C	A	A	T	C	T	T	T	A	A	T	C	A	G	T	G	T	G	T	A	A	C	A	T	T	A	G	G	G	A	G	G	A	C	T	T	G	A	A	A	G	A	G	C	C	A	C
1975	Delta	>107868|29660|29888	C	A	A	T	C	T	T	T	A	A	T	C	A	G	T	G	T	G	T	A	A	C	A	T	T	A	G	G	G	A	G	G	A	C	T	T	G	A	A	A	G	A	G	C	C	A	C
1976	Delta	>107862|29656|29884	C	A	A	T	C	T	T	T	A	A	T	C	A	G	T	G	T	G	T	A	A	C	A	T	T	A	G	G	G	A	G	G	A	C	T	T	G	A	A	A	G	A	G	C	C	A	C
1977	Delta	>107860|29625|29853	C	A	A	T	C	T	T	T	A	A	T	C	A	G	T	G	T	G	T	A	A	C	A	T	T	A	G	G	G	A	G	G	A	C	T	T	G	A	A	A	G	A	G	C	C	A	C
1978	Delta	>107404|29662|29890	C	A	A	T	C	T	T	T	A	A	T	C	A	G	T	G	T	G	T	A	A	C	A	T	T	A	G	G	G	A	G	G	A	C	T	T	G	A	A	A	G	A	G	C	C	A	C
1979	Delta	>107254|29660|29888	C	A	A	T	C	T	T	T	A	A	T	C	A	G	T	G	T	G	T	A	A	C	A	T	T	A	G	G	G	A	G	G	A	C	T	T	G	A	A	A	G	A	G	C	C	A	C
1980	Delta	>107249|29661|29889	C	A	A	T	C	T	T	T	A	A	T	C	A	G	T	G	T	G	T	A	A	C	A	T	T	A	G	G	G	A	G	G	A	C	T	T	G	A	A	A	G	A	G	C	C	A	C
1981	Delta	>107000|29660|29888	C	A	A	T	C	T	T	T	A	A	T	C	A	G	T	G	T	G	T	A	A	C	A	T	T	A	G	G	G	A	G	G	A	C	T	T	G	A	A	A	G	A	G	C	C	A	C
1982	Delta	>106997|29626|29854	C	A	A	T	C	T	T	T	A	A	T	C	A	G	T	G	T	G	T	A	A	C	A	T	T	A	G	G	G	A	G	G	A	C	T	T	G	A	A	A	G	A	G	C	C	A	C
1983	Delta	>106815|29660|29888	C	A	A	T	C	T	T	T	A	A	T	C	A	G	T	G	T	G	T	A	A	C	A	T	T	A	G	G	G	A	G	G	A	C	T	T	G	A	A	A	G	A	G	C	C	A	C
1984	Delta	>106800|29632|29860	C	A	A	T	C	T	T	T	A	A	T	C	A	G	T	G	T	G	T	A	A	C	A	T	T	A	G	G	G	A	G	G	A	C	T	T	G	A	A	A	G	A	G	C	C	A	C
1985	Delta	>106787|29660|29888	C	A	A	T	C	T	T	T	A	A	T	C	A	G	T	G	T	G	T	A	A	C	A	T	T	A	G	G	G	A	G	G	A	C	T	T	G	A	A	A	G	A	G	C	C	A	C
1986	Delta	>106783|29661|29889	C	A	A	T	C	T	T	T	A	A	T	C	A	G	T	G	T	G	T	A	A	C	A	T	T	A	G	G	G	A	G	G	A	C	T	T	G	A	A	A	G	A	G	C	C	A	C
1987	Delta	>106779|29658|29886	C	A	A	T	C	T	T	T	A	A	T	C	A	G	T	G	T	G	T	A	A	C	A	T	T	A	G	G	G	A	G	G	A	C	T	T	G	A	A	A	G	A	G	C	C	A	C
1988	Delta	>106773|29660|29888	C	A	A	T	C	T	T	T	A	A	T	C	A	G	T	G	T	G	T	A	A	C	A	T	T	A	G	G	G	A	G	G	A	C	T	T	G	A	A	A	G	A	G	C	C	A	C
1989	Delta	>106772|29651|29879	C	A	A	T	C	T	T	T	A	A	T	C	A	G	T	G	T	G	T	A	A	C	A	T	T	A	G	G	G	A	G	G	A	C	T	T	G	A	A	A	G	A	G	C	C	A	C
1990	Delta	>106770|29651|29879	C	A	A	T	C	T	T	T	A	A	T	C	A	G	T	G	T	G	T	A	A	C	A	T	T	A	G	G	G	A	G	G	A	C	T	T	G	A	A	A	G	A	G	C	C	A	C
1991	Delta	>106762|29660|29888	C	A	A	T	C	T	T	T	A	A	T	C	A	G	T	G	T	G	T	A	A	C	A	T	T	A	G	G	G	A	G	G	A	C	T	T	G	A	A	A	G	A	G	C	C	A	C
1992	Delta	>106559|29660|29888	C	A	A	T	C	T	T	T	A	A	T	C	A	G	T	G	T	G	T	A	A	C	A	T	T	A	G	G	G	A	G	G	A	C	T	T	G	A	A	A	G	A	G	C	C	A	C
1993	Delta	>106557|29660|29888	C	A	A	T	C	T	T	T	A	A	T	C	A	G	T	G	T	G	T	A	A	C	A	T	T	A	G	G	G	A	G	G	A	C	T	T	G	A	A	A	G	A	G	C	C	A	C
1994	Delta	>106555|29652|29880	C	A	A	T	C	T	T	T	A	A	T	C	A	G	T	G	T	G	T	A	A	C	A	T	T	A	G	G	G	A	G	G	A	C	T	T	G	A	A	A	G	A	G	C	C	A	C
1995	Delta	>106554|29657|29885	C	A	A	T	C	T	T	T	A	A	T	C	A	G	T	G	T	G	T	A	A	C	A	T	T	A	G	G	G	A	G	G	A	C	T	T	G	A	A	A	G	A	G	C	C	A	C
1996	Delta	>106553|29658|29886	C	A	A	T	C	T	T	T	A	A	T	C	A	G	T	G	T	G	T	A	A	C	A	T	T	A	G	G	G	A	G	G	A	C	T	T	G	A	A	A	G	A	G	C	C	A	C
1997	Delta	>106552|29660|29888	C	A	A	T	C	T	T	T	A	A	T	C	A	G	T	G	T	G	T	A	A	C	A	T	T	A	G	G	G	A	G	G	A	C	T	T	G	A	A	A	G	A	G	C	C	A	C
1998	Delta	>106550|29625|29853	C	A	A	T	C	T	T	T	A	A	T	C	A	G	T	G	T	G	T	A	A	C	A	T	T	A	G	G	G	A	G	G	A	C	T	T	G	A	A	A	G	A	G	C	C	A	C
1999	Delta	>106549|29657|29885	C	A	A	T	C	T	T	T	A	A	T	C	A	G	T	G	T	G	T	A	A	C	A	T	T	A	G	G	G	A	G	G	A	C	T	T	G	A	A	A	G	A	G	C	C	A	C
[truncated: 6,228 more rows]
[truncated: 109 more columns]

## Sheet: UTR5
Sl	Variant	Info	7	8	9	10	11	12	13	14	15	16	17	18	19	20	21	22	23	24	25	26	27	28	29	30	31	32	33	45	46	47	48	49	50	51	52	53	54	55	56	57	58	59	61	62	63	64	65
1	Delta	>147560|1|265	G	G	T	T	T	A	T	A	C	C	T	T	C	C	C	A	G	G	T	A	A	C	A	A	A	C	C	G	A	T	C	T	C	T	T	G	T	A	G	A	T	C	G	T	T	C	T
2	Delta	>142105|1|265	G	G	T	T	T	A	T	A	C	C	T	T	C	C	C	A	G	G	T	A	A	C	A	A	A	C	C	G	A	T	C	T	C	T	T	G	T	A	G	A	T	C	G	T	T	C	T
3	Delta	>113225|1|265	G	G	T	T	T	A	T	A	C	C	T	T	C	C	C	A	G	G	T	A	A	C	A	A	A	C	C	G	A	T	C	T	C	T	T	G	T	A	G	A	T	C	G	T	T	C	T
4	Delta	>105935|1|265	G	G	T	T	T	A	T	A	C	C	T	T	C	C	C	A	G	G	T	A	A	C	A	A	A	C	C	G	A	T	C	T	C	T	T	G	T	A	G	A	T	C	G	T	T	C	T
5	Delta	>100717|1|265	G	G	T	T	T	A	T	A	C	C	T	T	C	C	C	A	G	G	T	A	A	C	A	A	A	C	C	G	A	T	C	T	C	T	T	G	T	A	G	A	T	C	G	T	T	C	T
6	Delta	>76872|1|265	G	G	T	T	T	A	T	A	C	C	T	T	C	C	C	A	G	G	T	A	A	C	A	A	A	C	C	G	A	T	C	T	C	T	T	G	T	A	G	A	T	C	G	T	T	C	T
7	Delta	>66985|1|265	G	G	T	T	T	A	T	A	C	C	T	T	C	C	C	A	G	G	T	A	A	C	A	A	A	C	C	G	A	T	C	T	C	T	T	G	T	A	G	A	T	C	G	T	T	C	T
8	Delta	>56868|1|265	G	G	T	T	T	A	T	A	C	C	T	T	C	C	C	A	G	G	T	A	A	C	A	A	A	C	C	G	A	T	C	T	C	T	T	G	T	A	G	A	T	C	G	T	T	C	T
9	Delta	>56855|1|265	G	G	T	T	T	A	T	A	C	C	T	T	C	C	C	A	G	G	T	A	A	C	A	A	A	C	C	G	A	T	C	T	C	T	T	G	T	A	G	A	T	C	G	T	T	C	T
10	Delta	>55562|1|265	G	G	T	T	T	A	T	A	C	C	T	T	C	C	C	A	G	G	T	A	A	C	A	A	A	C	C	G	A	T	C	T	C	T	T	G	T	A	G	A	T	C	G	T	T	C	T
11	Delta	>46453|1|265	G	G	T	T	T	A	T	A	C	C	T	T	C	C	C	A	G	G	T	A	A	C	A	A	A	C	C	G	A	T	C	T	C	T	T	G	T	A	G	A	T	C	G	T	T	C	T
12	Delta	>46320|1|265	G	G	T	T	T	A	T	A	C	C	T	T	C	C	C	A	G	G	T	A	A	C	A	A	A	C	C	G	A	T	C	T	C	T	T	G	T	A	G	A	T	C	G	T	T	C	T
13	Delta	>46158|1|265	G	G	T	T	T	A	T	A	C	C	T	T	C	C	C	A	G	G	T	A	A	C	A	A	A	C	C	G	A	T	C	T	C	T	T	G	T	A	G	A	T	C	G	T	T	C	T
14	Delta	>46131|1|265	G	G	T	T	T	A	T	A	C	C	T	T	C	C	C	A	G	G	T	A	A	C	A	A	A	C	C	G	A	T	C	T	C	T	T	G	T	A	G	A	T	C	G	T	T	C	T
15	Delta	>45964|1|265	G	G	T	T	T	A	T	A	C	C	T	T	C	C	C	A	G	G	T	A	A	C	A	A	A	C	C	G	A	T	C	T	C	T	T	G	T	A	G	A	T	C	G	T	T	C	T
16	Delta	>45919|1|265	G	G	T	T	T	A	T	A	C	C	T	T	C	C	C	A	G	G	T	A	A	C	A	A	A	C	C	G	A	T	C	T	C	T	T	G	T	A	G	A	T	C	G	T	T	C	T
17	Delta	>45700|1|265	G	G	T	T	T	A	T	A	C	C	T	T	C	C	C	A	G	G	T	A	A	C	A	A	A	C	C	G	A	T	C	T	C	T	T	G	T	A	G	A	T	C	G	T	T	C	T
18	Delta	>45697|1|265	G	G	T	T	T	A	T	A	C	C	T	T	C	C	C	A	G	G	T	A	A	C	A	A	A	C	C	G	A	T	C	T	C	T	T	G	T	A	G	A	T	C	G	T	T	C	T
19	Delta	>45682|1|265	G	G	T	T	T	A	T	A	C	C	T	T	C	C	C	A	G	G	T	A	A	C	A	A	A	C	C	G	A	T	C	T	C	T	T	G	T	A	G	A	T	C	G	T	T	C	T
20	Delta	>25856|1|265	G	G	T	T	T	A	T	A	C	C	T	T	C	C	C	A	G	G	T	A	A	C	A	A	A	C	C	G	A	T	C	T	C	T	T	G	T	A	G	A	T	C	G	T	T	C	T
21	Delta	>153986|1|265	G	G	T	T	T	A	T	A	C	C	T	T	C	C	C	A	G	G	T	A	A	C	A	A	A	C	C	G	A	T	C	T	C	T	T	G	T	A	G	A	T	C	G	T	T	C	T
22	Delta	>142100|1|265	G	G	T	T	T	A	T	A	C	C	T	T	C	C	C	A	G	G	T	A	A	C	A	A	A	C	C	G	A	T	C	T	C	T	T	G	T	A	G	A	T	C	G	T	T	C	T
23	Delta	>137886|1|265	G	G	T	T	T	A	T	A	C	C	T	T	C	C	C	A	G	G	T	A	A	C	A	A	A	C	C	G	A	T	C	T	C	T	T	G	T	A	G	A	T	C	G	T	T	C	T
24	Delta	>134697|1|265	G	G	T	T	T	A	T	A	C	C	T	T	C	C	C	A	G	G	T	A	A	C	A	A	A	C	C	G	A	T	C	T	C	T	T	G	T	A	G	A	T	C	G	T	T	C	T
25	Delta	>131469|1|265	G	G	T	T	T	A	T	A	C	C	T	T	C	C	C	A	G	G	T	A	A	C	A	A	A	C	C	G	A	T	C	T	C	T	T	G	T	A	G	A	T	C	G	T	T	C	T
26	Delta	>125122|1|265	G	G	T	T	T	A	T	A	C	C	T	T	C	C	C	A	G	G	T	A	A	C	A	A	A	C	C	G	A	T	C	T	C	T	T	G	T	A	G	A	T	C	G	T	T	C	T
27	Delta	>113786|1|265	G	G	T	T	T	A	T	A	C	C	T	T	C	C	C	A	G	G	T	A	A	C	A	A	A	C	C	G	A	T	C	T	C	T	T	G	T	A	G	A	T	C	G	T	T	C	T
28	Delta	>113224|1|265	G	G	T	T	T	A	T	A	C	C	T	T	C	C	C	A	G	G	T	A	A	C	A	A	A	C	C	G	A	T	C	T	C	T	T	G	T	A	G	A	T	C	G	T	T	T	T
29	Delta	>81712|1|265	G	G	T	T	T	A	T	A	C	C	T	T	C	C	C	A	G	G	T	A	A	C	A	A	A	C	C	G	A	T	C	T	C	T	T	G	T	A	G	A	T	C	G	T	T	C	T
30	Delta	>78583|1|265	G	G	T	T	T	A	T	A	C	C	T	T	C	C	C	A	G	G	T	A	A	C	A	A	A	C	C	G	A	T	C	T	C	T	T	G	T	A	G	A	T	C	G	T	T	C	T
31	Delta	>78023|1|265	G	G	T	T	T	A	T	A	C	C	T	T	C	C	C	A	G	G	T	A	A	C	A	A	A	C	C	G	A	T	C	T	C	T	T	G	T	A	G	A	T	C	G	T	T	C	T
32	Delta	>70661|1|265	G	G	T	T	T	A	T	A	C	C	T	T	C	C	C	A	G	G	T	A	A	C	A	A	A	C	C	G	A	T	C	T	C	T	T	G	T	A	G	A	T	C	G	T	T	C	T
33	Delta	>66034|1|265	G	G	T	T	T	A	T	A	C	C	T	T	C	C	C	A	G	G	T	A	A	C	A	A	A	C	C	G	A	T	C	T	C	T	T	G	T	A	G	A	T	C	G	T	T	C	T
34	Delta	>25851|1|265	G	G	T	T	T	A	T	A	C	C	T	T	C	C	C	A	G	G	T	A	A	C	A	A	A	C	C	G	A	T	C	T	C	T	T	G	T	A	G	A	T	C	G	T	T	C	T
35	Delta	>21637|1|265	G	G	T	T	T	A	T	A	C	C	T	T	C	C	C	A	G	G	T	A	A	C	A	A	A	C	C	G	A	T	C	T	C	T	T	G	T	A	G	A	T	C	G	T	T	C	T
36	Delta	>154193|1|265	G	G	T	T	T	A	T	A	C	C	T	T	C	C	C	A	G	G	T	A	A	C	A	A	A	C	C	G	A	T	C	T	C	T	T	G	T	A	G	A	T	C	G	T	T	C	T
37	Delta	>154071|1|265	G	G	T	T	T	A	T	A	C	C	T	T	C	C	C	A	G	G	T	A	A	C	A	A	A	C	C	G	A	T	C	T	C	T	T	G	T	A	G	A	T	C	G	T	T	C	T
38	Delta	>154011|1|265	G	G	T	T	T	A	T	A	C	C	T	T	C	C	C	A	G	G	T	A	A	C	A	A	A	C	C	G	A	T	C	T	C	T	T	G	T	A	G	A	T	C	G	T	T	C	T
39	Delta	>154010|1|265	G	G	T	T	T	A	T	A	C	C	T	T	C	C	C	A	G	G	T	A	A	C	A	A	A	C	C	G	A	T	C	T	C	T	T	G	T	A	G	A	T	C	G	T	T	C	T
40	Delta	>154009|1|265	G	G	T	T	T	A	T	A	C	C	T	T	C	C	C	A	G	G	T	A	A	C	A	A	A	C	C	G	A	T	C	T	C	T	T	G	T	A	G	A	T	C	G	T	T	C	T
41	Delta	>154008|1|265	G	G	T	T	T	A	T	A	C	C	T	T	C	C	C	A	G	G	T	A	A	C	A	A	A	C	C	G	A	T	C	T	C	T	T	G	T	A	G	A	T	C	G	T	T	C	T
42	Delta	>154007|1|265	G	G	T	T	T	A	T	A	C	C	T	T	C	C	C	A	G	G	T	A	A	C	A	A	A	C	C	G	A	T	C	T	C	T	T	G	T	A	G	A	T	C	G	T	T	C	T
43	Delta	>154006|1|265	G	G	T	T	T	A	T	A	C	C	T	T	C	C	C	A	G	G	T	A	A	C	A	A	A	C	C	G	A	T	C	T	C	T	T	G	T	A	G	A	T	C	G	T	T	C	T
44	Delta	>154004|1|265	G	G	T	T	T	A	T	A	C	C	T	T	C	C	C	A	G	G	T	A	A	C	A	A	A	C	C	G	A	T	C	T	C	T	T	G	T	A	G	A	T	C	G	T	T	C	T
45	Delta	>154003|1|265	G	G	T	T	T	A	T	A	C	C	T	T	C	C	C	A	G	G	T	A	A	C	A	A	A	C	C	G	A	T	C	T	C	T	T	G	T	A	G	A	T	C	G	T	T	C	T
46	Delta	>154002|1|265	G	G	T	T	T	A	T	A	C	C	T	T	C	C	C	A	G	G	T	A	A	C	A	A	A	C	C	G	A	T	C	T	C	T	T	G	T	A	G	A	T	C	G	T	T	C	T
47	Delta	>154001|1|265	G	G	T	T	T	A	T	A	C	C	T	T	C	C	C	A	G	G	T	A	A	C	A	A	A	C	C	G	A	T	C	T	C	T	T	G	T	A	G	A	T	C	G	T	T	C	T
48	Delta	>154000|1|265	G	G	T	T	T	A	T	A	C	C	T	T	C	C	C	A	G	G	T	A	A	C	A	A	A	C	C	G	A	T	C	T	C	T	T	G	T	A	G	A	T	C	G	T	T	C	T
49	Delta	>153999|1|265	G	G	T	T	T	A	T	A	C	C	T	T	C	C	C	A	G	G	T	A	A	C	A	A	A	C	C	G	A	T	C	T	C	T	T	G	T	A	G	A	T	C	G	T	T	C	T
50	Delta	>153998|1|265	G	G	T	T	T	A	T	A	C	C	T	T	C	C	C	A	G	G	T	A	A	C	A	A	A	C	C	G	A	T	C	T	C	T	T	G	T	A	G	A	T	C	G	T	T	C	T
51	Delta	>153997|1|265	G	G	T	T	T	A	T	A	C	C	T	T	C	C	C	A	G	G	T	A	A	C	A	A	A	C	C	G	A	T	C	T	C	T	T	G	T	A	G	A	T	C	G	T	T	C	T
52	Delta	>153996|1|265	G	G	T	T	T	A	T	A	C	C	T	T	C	C	C	A	G	G	T	A	A	C	A	A	A	C	C	G	A	T	C	T	C	T	T	G	T	A	G	A	T	C	G	T	T	C	T
53	Delta	>153995|1|265	G	G	T	T	T	A	T	A	C	C	T	T	C	C	C	A	G	G	T	A	A	C	A	A	A	C	C	G	A	T	C	T	C	T	T	G	T	A	G	A	T	C	G	T	T	C	T
54	Delta	>153994|1|265	G	G	T	T	T	A	T	A	C	C	T	T	C	C	C	A	G	G	T	A	A	C	A	A	A	C	C	G	A	T	C	T	C	T	T	G	T	A	G	A	T	C	G	T	T	C	T
55	Delta	>153993|1|265	G	G	T	T	T	A	T	A	C	C	T	T	C	C	C	A	G	G	T	A	A	C	A	A	A	C	C	G	A	T	C	T	C	T	T	G	T	A	G	A	T	C	G	T	T	C	T
56	Delta	>153992|1|265	G	G	T	T	T	A	T	A	C	C	T	T	C	C	C	A	G	G	T	A	A	C	A	A	A	C	C	G	A	T	C	T	C	T	T	G	T	A	G	A	T	C	G	T	T	C	T
57	Delta	>153991|1|265	G	G	T	T	T	A	T	A	C	C	T	T	C	C	C	A	G	G	T	A	A	C	A	A	A	C	C	G	A	T	C	T	C	T	T	G	T	A	G	A	T	C	G	T	T	C	T
58	Delta	>153990|1|265	G	G	T	T	T	A	T	A	C	C	T	T	C	C	C	A	G	G	T	A	A	C	A	A	A	C	C	G	A	T	C	T	C	T	T	G	T	A	G	A	T	C	G	T	T	C	T
59	Delta	>153989|1|265	G	G	T	T	T	A	T	A	C	C	T	T	C	C	C	A	G	G	T	A	A	C	A	A	A	C	C	G	A	T	C	T	C	T	T	G	T	A	G	A	T	C	G	T	T	C	T
60	Delta	>153988|1|265	G	G	T	T	T	A	T	A	C	C	T	T	C	C	C	A	G	G	T	A	A	C	A	A	A	C	C	G	A	T	C	T	C	T	T	G	T	A	G	A	T	C	G	T	T	C	T
61	Delta	>153987|1|265	G	G	T	T	T	A	T	A	C	C	T	T	C	C	C	A	G	G	T	A	A	C	A	A	A	C	C	G	A	T	C	T	C	T	T	G	T	A	G	A	T	C	G	T	T	C	T
62	Delta	>153984|1|265	G	G	T	T	T	A	T	A	C	C	T	T	C	C	C	A	G	G	T	A	A	C	A	A	A	C	C	G	A	T	C	T	C	T	T	G	T	A	G	A	T	C	G	T	T	C	T
63	Delta	>153983|1|265	G	G	T	T	T	A	T	A	C	C	T	T	C	C	C	A	G	G	T	A	A	C	A	A	A	C	C	G	A	T	C	T	C	T	T	G	T	A	G	A	T	C	G	T	T	C	T
64	Delta	>153982|1|265	G	G	T	T	T	A	T	A	C	C	T	T	C	C	C	A	G	G	T	A	A	C	A	A	A	C	C	G	A	T	C	T	C	T	T	G	T	A	G	A	T	C	G	T	T	C	T
65	Delta	>153981|1|265	G	G	T	T	T	A	T	A	C	C	T	T	C	C	C	A	G	G	T	A	A	C	A	A	A	C	C	G	A	T	C	T	C	T	T	G	T	A	G	A	T	C	G	T	T	C	T
66	Delta	>153980|1|265	G	G	T	T	T	A	T	A	C	C	T	T	C	C	C	A	G	G	T	A	A	C	A	A	A	C	C	G	A	T	C	T	C	T	T	G	T	A	G	A	T	C	G	T	T	C	T
67	Delta	>153979|1|265	G	G	T	T	T	A	T	A	C	C	T	T	C	C	C	A	G	G	T	A	A	C	A	A	A	C	C	G	A	T	C	T	C	T	T	G	T	A	G	A	T	C	G	T	T	C	T
68	Delta	>153978|1|265	G	G	T	T	T	A	T	A	C	C	T	T	C	C	C	A	G	G	T	A	A	C	A	A	A	C	C	G	A	T	C	T	C	T	T	G	T	A	G	A	T	C	G	T	T	C	T
69	Delta	>153977|1|265	G	G	T	T	T	A	T	A	C	C	T	T	C	C	C	A	G	G	T	A	A	C	A	A	A	C	C	G	A	T	C	T	C	T	T	G	T	A	G	A	T	C	G	T	T	C	T
70	Delta	>153976|1|265	G	G	T	T	T	A	T	A	C	C	T	T	C	C	C	A	G	G	T	A	A	C	A	A	A	C	C	G	A	T	C	T	C	T	T	G	T	A	G	A	T	C	G	T	T	C	T
71	Delta	>153975|1|265	G	G	T	T	T	A	T	A	C	C	T	T	C	C	C	A	G	G	T	A	A	C	A	A	A	C	C	G	A	T	C	T	C	T	T	G	T	A	G	A	T	C	G	T	T	C	T
72	Delta	>153974|1|265	G	G	T	T	T	A	T	A	C	C	T	T	C	C	C	A	G	G	T	A	A	C	A	A	A	C	C	G	A	T	C	T	C	T	T	G	T	A	G	A	T	C	G	T	T	C	T
73	Delta	>153972|1|265	G	G	T	T	T	A	T	A	C	C	T	T	C	C	C	A	G	G	T	A	A	C	A	A	A	C	C	G	A	T	C	T	C	T	T	G	T	A	G	A	T	C	G	T	T	C	T
74	Delta	>153971|1|265	G	G	T	T	T	A	T	A	C	C	T	T	C	C	C	A	G	G	T	A	A	C	A	A	A	C	C	G	A	T	C	T	C	T	T	G	T	A	G	A	T	C	G	T	T	C	T
75	Delta	>153969|1|265	G	G	T	T	T	A	T	A	C	C	T	T	C	C	C	A	G	G	T	A	A	C	A	A	A	C	C	G	A	T	C	T	C	T	T	G	T	A	G	A	T	C	G	T	T	C	T
76	Delta	>153966|1|265	G	G	T	T	T	A	T	A	C	C	T	T	C	C	C	A	G	G	T	A	A	C	A	A	A	C	C	G	A	T	C	T	C	T	T	G	T	A	G	A	T	C	G	T	T	C	T
77	Delta	>153965|1|265	G	G	T	T	T	A	T	A	C	C	T	T	C	C	C	A	G	G	T	A	A	C	A	A	A	C	C	G	A	T	C	T	C	T	T	G	T	A	G	A	T	C	G	T	T	C	T
78	Delta	>153964|1|265	G	G	T	T	T	A	T	A	C	C	T	T	C	C	C	A	G	G	T	A	A	C	A	A	A	C	C	G	A	T	C	T	C	T	T	G	T	A	G	A	T	C	G	T	T	C	T
79	Delta	>153963|1|265	G	G	T	T	T	A	T	A	C	C	T	T	C	C	C	A	G	G	T	A	A	C	A	A	A	C	C	G	A	T	C	T	C	T	T	G	T	A	G	A	T	C	G	T	T	C	T
80	Delta	>153961|1|265	G	G	T	T	T	A	T	A	C	C	T	T	C	C	C	A	G	G	T	A	A	C	A	A	A	C	C	G	A	T	C	T	C	T	T	G	T	A	G	A	T	C	G	T	T	C	T
81	Delta	>153959|1|265	G	G	T	T	T	A	T	A	C	C	T	T	C	C	C	A	G	G	T	A	A	C	A	A	A	C	C	G	A	T	C	T	C	T	T	G	T	A	G	A	T	C	G	T	T	C	T
82	Delta	>153940|1|265	G	G	T	T	T	A	T	A	C	C	T	T	C	C	C	A	G	G	T	A	A	C	A	A	A	C	C	G	A	T	C	T	C	T	T	G	T	A	G	A	T	C	G	T	T	C	T
83	Delta	>153934|1|265	G	G	T	T	T	A	T	A	C	C	T	T	C	C	C	A	G	G	T	A	A	C	A	A	A	C	C	G	A	T	C	T	C	T	T	G	T	A	G	A	T	C	G	T	T	C	T
84	Delta	>153927|1|265	G	G	T	T	T	A	T	A	C	C	T	T	C	C	C	A	G	G	T	A	A	C	A	A	A	C	C	G	A	T	C	T	C	T	T	G	T	A	G	A	T	C	G	T	T	C	T
85	Delta	>153482|1|265	G	G	T	T	T	A	T	A	C	C	T	T	C	C	C	A	G	G	T	A	A	C	A	A	A	C	C	G	A	T	C	T	C	T	T	G	T	A	G	A	T	C	G	T	T	C	T
86	Delta	>153354|1|265	G	G	T	T	T	A	T	A	C	C	T	T	C	C	C	A	G	G	T	A	A	C	A	A	A	C	C	G	A	T	C	T	C	T	T	G	T	A	G	A	T	C	G	T	T	C	T
87	Delta	>153123|1|265	G	G	T	T	T	A	T	A	C	C	T	T	C	C	C	A	G	G	T	A	A	C	A	A	A	C	C	G	A	T	C	T	C	T	T	G	T	A	G	A	T	C	G	T	T	C	T
88	Delta	>153122|1|265	G	G	T	T	T	A	T	A	C	C	T	T	C	C	C	A	G	G	T	A	A	C	A	A	A	C	C	G	A	T	C	T	C	T	T	G	T	A	G	A	T	C	G	T	T	C	T
89	Delta	>152857|1|265	G	G	T	T	T	A	T	A	C	C	T	T	C	C	C	A	G	G	T	A	A	C	A	A	A	C	C	G	A	T	C	T	C	T	T	G	T	A	G	A	T	C	G	T	T	C	T
90	Delta	>152854|1|265	G	G	T	T	T	A	T	A	C	C	T	T	C	C	C	A	G	G	T	A	A	C	A	A	A	C	C	G	A	T	C	T	C	T	T	G	T	A	G	A	T	C	G	T	T	C	T
91	Delta	>152846|1|265	G	G	T	T	T	A	T	A	C	C	T	T	C	C	C	A	G	G	T	A	A	C	A	A	A	C	C	G	A	T	C	T	C	T	T	G	T	A	G	A	T	C	G	T	T	C	T
92	Delta	>152845|1|265	G	G	T	T	T	A	T	A	C	C	T	T	C	C	C	A	G	G	T	A	A	C	A	A	A	C	C	G	A	T	C	T	C	T	T	G	T	A	G	A	T	C	G	T	T	C	T
93	Delta	>152844|1|265	G	G	T	T	T	A	T	A	C	C	T	T	C	C	C	A	G	G	T	A	A	C	A	A	A	C	C	G	A	T	C	T	C	T	T	G	T	A	G	A	T	C	G	T	T	C	T
94	Delta	>152843|1|265	G	G	T	T	T	A	T	A	C	C	T	T	C	C	C	A	G	G	T	A	A	C	A	A	A	C	C	G	A	T	C	T	C	T	T	G	T	A	G	A	T	C	G	T	T	C	T
95	Delta	>151132|1|265	G	G	T	T	T	A	T	A	C	C	T	T	C	C	C	A	G	G	T	A	A	C	A	A	A	C	C	G	A	T	C	T	C	T	T	G	T	A	G	A	T	C	G	T	T	C	T
96	Delta	>151130|1|265	G	G	T	T	T	A	T	A	C	C	T	T	C	C	C	A	G	G	T	A	A	C	A	A	A	C	C	G	A	T	C	T	C	T	T	G	T	A	G	A	T	C	G	T	T	C	T
97	Delta	>151128|1|265	G	G	T	T	T	A	T	A	C	C	T	T	C	C	C	A	G	G	T	A	A	C	A	A	A	C	C	G	A	T	C	T	C	T	T	G	T	A	G	A	T	C	G	T	T	C	T
98	Delta	>151127|1|265	G	G	T	T	T	A	T	A	C	C	T	T	C	C	C	A	G	G	T	A	A	C	A	A	A	C	C	G	A	T	C	T	C	T	T	G	T	A	G	A	T	C	G	T	T	C	T
99	Delta	>151126|1|265	G	G	T	T	T	A	T	A	C	C	T	T	C	C	C	A	G	G	T	A	A	C	A	A	A	C	C	G	A	T	C	T	C	T	T	G	T	A	G	A	T	C	G	T	T	C	T
100	Delta	>150625|1|265	G	G	T	T	T	A	T	A	C	C	T	T	C	C	C	A	G	G	T	A	A	C	A	A	A	C	C	G	A	T	C	T	C	T	T	G	T	A	G	A	T	C	G	T	T	C	T
101	Delta	>150155|1|265	G	G	T	T	T	A	T	A	C	C	T	T	C	C	C	A	G	G	T	A	A	C	A	A	A	C	C	G	A	T	C	T	C	T	T	G	T	A	G	A	T	C	G	T	T	C	T
102	Delta	>149284|1|265	G	G	T	T	T	A	T	A	C	C	T	T	C	C	C	A	G	G	T	A	A	C	A	A	A	C	C	G	A	T	C	T	C	T	T	G	T	A	G	A	T	C	G	T	T	C	T
103	Delta	>149283|1|265	G	G	T	T	T	A	T	A	C	C	T	T	C	C	C	A	G	G	T	A	A	C	A	A	A	C	C	G	A	T	C	T	C	T	T	G	T	A	G	A	T	C	G	T	T	C	T
104	Delta	>148031|1|265	G	G	T	T	T	A	T	A	C	C	T	T	C	C	C	A	G	G	T	A	A	C	A	A	A	C	C	G	A	T	C	T	C	T	T	G	T	A	G	A	T	C	G	T	T	C	T
105	Delta	>147827|1|265	G	G	T	T	T	A	T	A	C	C	T	T	C	C	C	A	G	G	T	A	A	C	A	A	A	C	C	G	A	T	C	T	C	T	T	G	T	A	G	A	T	C	G	T	T	C	T
106	Delta	>147779|1|265	G	G	T	T	T	A	T	A	C	C	T	T	C	C	C	A	G	G	T	A	A	C	A	A	A	C	C	G	A	T	C	T	C	T	T	G	T	A	G	A	T	C	G	T	T	C	T
107	Delta	>147415|1|265	G	G	T	T	T	A	T	A	C	C	T	T	C	C	C	A	G	G	T	A	A	C	A	A	A	C	C	G	A	T	C	T	C	T	T	G	T	A	G	A	T	C	G	T	T	C	T
108	Delta	>147414|1|265	G	G	T	T	T	A	T	A	C	C	T	T	C	C	C	A	G	G	T	A	A	C	A	A	A	C	C	G	A	T	C	T	C	T	T	G	T	A	G	A	T	C	G	T	T	C	T
109	Delta	>147413|1|265	G	G	T	T	T	A	T	A	C	C	T	T	C	C	C	A	G	G	T	A	A	C	A	A	A	C	C	G	A	T	C	T	C	T	T	G	T	A	G	A	T	C	G	T	T	C	T
110	Delta	>147412|1|265	G	G	T	T	T	A	T	A	C	C	T	T	C	C	C	A	G	G	T	A	A	C	A	A	A	C	C	G	A	T	C	T	C	T	T	G	T	A	G	A	T	C	G	T	T	C	T
111	Delta	>147110|1|265	G	G	T	T	T	A	T	A	C	C	T	T	C	C	C	A	G	G	T	A	A	C	A	A	A	C	C	G	A	T	C	T	C	T	T	G	T	A	G	A	T	C	G	T	T	C	T
112	Delta	>147075|1|265	G	G	T	T	T	A	T	A	C	C	T	T	C	C	C	A	G	G	T	A	A	C	A	A	A	C	C	G	A	T	C	T	C	T	T	G	T	A	G	A	T	C	G	T	T	C	T
113	Delta	>146945|1|265	G	G	T	T	T	A	T	A	C	C	T	T	C	C	C	A	G	G	T	A	A	C	A	A	A	C	C	G	A	T	C	T	C	T	T	G	T	A	G	A	T	C	G	T	T	C	T
114	Delta	>146927|1|265	G	G	T	T	T	A	T	A	C	C	T	T	C	C	C	A	G	G	T	A	A	C	A	A	A	C	C	G	A	T	C	T	C	T	T	G	T	A	G	A	T	C	G	T	T	C	T
115	Delta	>146904|1|265	G	G	T	T	T	A	T	A	C	C	T	T	C	C	C	A	G	G	T	A	A	C	A	A	A	C	C	G	A	T	C	T	C	T	T	G	T	A	G	A	T	C	G	T	T	C	T
116	Delta	>146868|1|265	G	G	T	T	T	A	T	A	C	C	T	T	C	C	C	A	G	G	T	A	A	C	A	A	A	C	C	G	A	T	C	T	C	T	T	G	T	A	G	A	T	C	G	T	T	C	T
117	Delta	>146710|1|265	G	G	T	T	T	A	T	A	C	C	T	T	C	C	C	A	G	G	T	A	A	C	A	A	A	C	C	G	A	T	C	T	C	T	T	G	T	A	G	A	T	C	G	T	T	C	T
118	Delta	>146355|1|265	G	G	T	T	T	A	T	A	C	C	T	T	C	C	C	A	G	G	T	A	A	C	A	A	A	C	C	G	A	T	C	T	C	T	T	G	T	A	G	A	T	C	G	T	T	C	T
119	Delta	>146275|1|265	G	G	T	T	T	A	T	A	C	C	T	T	C	C	C	A	G	G	T	A	A	C	A	A	A	C	C	G	A	T	C	T	C	T	T	G	T	A	G	A	T	C	G	T	T	C	T
120	Delta	>146229|1|265	G	G	T	T	T	A	T	A	C	C	T	T	C	C	C	A	G	G	T	A	A	C	A	A	A	C	C	G	A	T	C	T	C	T	T	G	T	A	G	A	T	C	G	T	T	C	T
121	Delta	>145571|1|265	G	G	T	T	T	A	T	A	C	C	T	T	C	C	C	A	G	G	T	A	A	C	A	A	A	C	C	G	A	T	C	T	C	T	T	G	T	A	G	A	T	C	G	T	T	C	T
122	Delta	>145097|1|265	G	G	T	T	T	A	T	A	C	C	T	T	C	C	C	A	G	G	T	A	A	C	A	A	A	C	C	G	A	T	C	T	C	T	T	G	T	A	G	A	T	C	G	T	T	C	T
123	Delta	>145089|1|265	G	G	T	T	T	A	T	A	C	C	T	T	C	C	C	A	G	G	T	A	A	C	A	A	A	C	C	G	A	T	C	T	C	T	T	G	T	A	G	A	T	C	G	T	T	C	T
124	Delta	>145024|1|265	G	G	T	T	T	A	T	A	C	C	T	T	C	C	C	A	G	G	T	A	A	C	A	A	A	C	C	G	A	T	C	T	C	T	T	G	T	A	G	A	T	C	G	T	T	C	T
125	Delta	>144905|1|265	G	G	T	T	T	A	T	A	C	C	T	T	C	C	C	A	G	G	T	A	A	C	A	A	A	C	C	G	A	T	C	T	C	T	T	G	T	A	G	A	T	C	G	T	T	C	T
126	Delta	>144786|1|265	G	G	T	T	T	A	T	A	C	C	T	T	C	C	C	A	G	G	T	A	A	C	A	A	A	C	C	G	A	T	C	T	C	T	T	G	T	A	G	A	T	C	G	T	T	C	T
127	Delta	>144757|1|265	G	G	T	T	T	A	T	A	C	C	T	T	C	C	C	A	G	G	T	A	A	C	A	A	A	C	C	G	A	T	C	T	C	T	T	G	T	A	G	A	T	C	G	T	T	C	T
128	Delta	>144684|1|265	G	G	T	T	T	A	T	A	C	C	T	T	C	C	C	A	G	G	T	A	A	C	A	A	A	C	C	G	A	T	C	T	C	T	T	G	T	A	G	A	T	C	G	T	T	C	T
129	Delta	>144662|1|265	G	G	T	T	T	A	T	A	C	C	T	T	C	C	C	A	G	G	T	A	A	C	A	A	A	C	C	G	A	T	C	T	C	T	T	G	T	A	G	A	T	C	G	T	T	C	T
130	Delta	>144383|1|265	G	G	T	T	T	A	T	A	C	C	T	T	C	C	C	A	G	G	T	A	A	C	A	A	A	C	C	G	A	T	C	T	C	T	T	G	T	A	G	A	T	C	G	T	T	C	T
131	Delta	>144376|1|265	G	G	T	T	T	A	T	A	C	C	T	T	C	C	C	A	G	G	T	A	A	C	A	A	A	C	C	G	A	T	C	T	C	T	T	G	T	A	G	A	T	C	G	T	T	C	T
132	Delta	>144372|1|265	G	G	T	T	T	A	T	A	C	C	T	T	C	C	C	A	G	G	T	A	A	C	A	A	A	C	C	G	A	T	C	T	C	T	T	G	T	A	G	A	T	C	G	T	T	C	T
133	Delta	>144115|1|265	G	G	T	T	T	A	T	A	C	C	T	T	C	C	C	A	G	G	T	A	A	C	A	A	A	C	C	G	A	T	C	T	C	T	T	G	T	A	G	A	T	C	G	T	T	C	T
134	Delta	>144114|1|265	G	G	T	T	T	A	T	A	C	C	T	T	C	C	C	A	G	G	T	A	A	C	A	A	A	C	C	G	A	T	C	T	C	T	T	G	T	A	G	A	T	C	G	T	T	C	T
135	Delta	>144113|1|265	G	G	T	T	T	A	T	A	C	C	T	T	C	C	C	A	G	G	T	A	A	C	A	A	A	C	C	G	A	T	C	T	C	T	T	G	T	A	G	A	T	C	G	T	T	C	T
136	Delta	>144112|1|265	G	G	T	T	T	A	T	A	C	C	T	T	C	C	C	A	G	G	T	A	A	C	A	A	A	C	C	G	A	T	C	T	C	T	T	G	T	A	G	A	T	C	G	T	T	C	T
137	Delta	>144111|1|265	G	G	T	T	T	A	T	A	C	C	T	T	C	C	C	A	G	G	T	A	A	C	A	A	A	C	C	G	A	T	C	T	C	T	T	G	T	A	G	A	T	C	G	T	T	C	T
138	Delta	>144110|1|265	G	G	T	T	T	A	T	A	C	C	T	T	C	C	C	A	G	G	T	A	A	C	A	A	A	C	C	G	A	T	C	T	C	T	T	G	T	A	G	A	T	C	G	T	T	C	T
139	Delta	>144064|1|265	G	G	T	T	T	A	T	A	C	C	T	T	C	C	C	A	G	G	T	A	A	C	A	A	A	C	C	G	A	T	C	T	C	T	T	G	T	A	G	A	T	C	G	T	T	C	T
140	Delta	>144060|1|265	G	G	T	T	T	A	T	A	C	C	T	T	C	C	C	A	G	G	T	A	A	C	A	A	A	C	C	G	A	T	C	T	C	T	T	G	T	A	G	A	T	C	G	T	T	C	T
141	Delta	>144056|1|265	G	G	T	T	T	A	T	A	C	C	T	T	C	C	C	A	G	G	T	A	A	C	A	A	A	C	C	G	A	T	C	T	C	T	T	G	T	A	G	A	T	C	G	T	T	C	T
142	Delta	>143820|1|265	G	G	T	T	T	A	T	A	C	C	T	T	C	C	C	A	G	G	T	A	A	C	A	A	A	C	C	G	A	T	C	T	C	T	T	G	T	A	G	A	T	C	G	T	T	C	T
143	Delta	>143819|1|265	G	G	T	T	T	A	T	A	C	C	T	T	C	C	C	A	G	G	T	A	A	C	A	A	A	C	C	G	A	T	C	T	C	T	T	G	T	A	G	A	T	C	G	T	T	C	T
144	Delta	>143760|1|265	G	G	T	T	T	A	T	A	C	C	T	T	C	C	C	A	G	G	T	A	A	C	A	A	A	C	C	G	A	T	C	T	C	T	T	G	T	A	G	A	T	C	G	T	T	C	T
145	Delta	>143759|1|265	G	G	T	T	T	A	T	A	C	C	T	T	C	C	C	A	G	G	T	A	A	C	A	A	A	C	C	G	A	T	C	T	C	T	T	G	T	A	G	A	T	C	G	T	T	C	T
146	Delta	>143757|1|265	G	G	T	T	T	A	T	A	C	C	T	T	C	C	C	A	G	G	T	A	A	C	A	A	A	C	C	G	A	T	C	T	C	T	T	G	T	A	G	A	T	C	G	T	T	C	T
147	Delta	>143756|1|265	G	G	T	T	T	A	T	A	C	C	T	T	C	C	C	A	G	G	T	A	A	C	A	A	A	C	C	G	A	T	C	T	C	T	T	G	T	A	G	A	T	C	G	T	T	C	T
148	Delta	>143755|1|265	G	G	T	T	T	A	T	A	C	C	T	T	C	C	C	A	G	G	T	A	A	C	A	A	A	C	C	G	A	T	C	T	C	T	T	G	T	A	G	A	T	C	G	T	T	C	T
149	Delta	>143754|1|265	G	G	T	T	T	A	T	A	C	C	T	T	C	C	C	A	G	G	T	A	A	C	A	A	A	C	C	G	A	T	C	T	C	T	T	G	T	A	G	A	T	C	G	T	T	C	T
150	Delta	>143753|1|265	G	G	T	T	T	A	T	A	C	C	T	T	C	C	C	A	G	G	T	A	A	C	A	A	A	C	C	G	A	T	C	T	C	T	T	G	T	A	G	A	T	C	G	T	T	C	T
151	Delta	>143752|1|265	G	G	T	T	T	A	T	A	C	C	T	T	C	C	C	A	G	G	T	A	A	C	A	A	A	C	C	G	A	T	C	T	C	T	T	G	T	A	G	A	T	C	G	T	T	C	T
152	Delta	>143751|1|265	G	G	T	T	T	A	T	A	C	C	T	T	C	C	C	A	G	G	T	A	A	C	A	A	A	C	C	G	A	T	C	T	C	T	T	G	T	A	G	A	T	C	G	T	T	C	T
153	Delta	>143750|1|265	G	G	T	T	T	A	T	A	C	C	T	T	C	C	C	A	G	G	T	A	A	C	A	A	A	C	C	G	A	T	C	T	C	T	T	G	T	A	G	A	T	C	G	T	T	C	T
154	Delta	>143749|1|265	G	G	T	T	T	A	T	A	C	C	T	T	C	C	C	A	G	G	T	A	A	C	A	A	A	C	C	G	A	T	C	T	C	T	T	G	T	A	G	A	T	C	G	T	T	C	T
155	Delta	>143748|1|265	G	G	T	T	T	A	T	A	C	C	T	T	C	C	C	A	G	G	T	A	A	C	A	A	A	C	C	G	A	T	C	T	C	T	T	G	T	A	G	A	T	C	G	T	T	C	T
156	Delta	>143747|1|265	G	G	T	T	T	A	T	A	C	C	T	T	C	C	C	A	G	G	T	A	A	C	A	A	A	C	C	G	A	T	C	T	C	T	T	G	T	A	G	A	T	C	G	T	T	C	T
157	Delta	>143746|1|265	G	G	T	T	T	A	T	A	C	C	T	T	C	C	C	A	G	G	T	A	A	C	A	A	A	C	C	G	A	T	C	T	C	T	T	G	T	A	G	A	T	C	G	T	T	C	T
158	Delta	>143745|1|265	G	G	T	T	T	A	T	A	C	C	T	T	C	C	C	A	G	G	T	A	A	C	A	A	A	C	C	G	A	T	C	T	C	T	T	G	T	A	G	A	T	C	G	T	T	C	T
159	Delta	>143744|1|265	G	G	T	T	T	A	T	A	C	C	T	T	C	C	C	A	G	G	T	A	A	C	A	A	A	C	C	G	A	T	C	T	C	T	T	G	T	A	G	A	T	C	G	T	T	C	T
160	Delta	>143743|1|265	G	G	T	T	T	A	T	A	C	C	T	T	C	C	C	A	G	G	T	A	A	C	A	A	A	C	C	G	A	T	C	T	C	T	T	G	T	A	G	A	T	C	G	T	T	C	T
161	Delta	>143742|1|265	G	G	T	T	T	A	T	A	C	C	T	T	C	C	C	A	G	G	T	A	A	C	A	A	A	C	C	G	A	T	C	T	C	T	T	G	T	A	G	A	T	C	G	T	T	C	T
162	Delta	>143741|1|265	G	G	T	T	T	A	T	A	C	C	T	T	C	C	C	A	G	G	T	A	A	C	A	A	A	C	C	G	A	T	C	T	C	T	T	G	T	A	G	A	T	C	G	T	T	C	T
163	Delta	>143740|1|265	G	G	T	T	T	A	T	A	C	C	T	T	C	C	C	A	G	G	T	A	A	C	A	A	A	C	C	G	A	T	C	T	C	T	T	G	T	A	G	A	T	C	G	T	T	C	T
164	Delta	>143739|1|265	G	G	T	T	T	A	T	A	C	C	T	T	C	C	C	A	G	G	T	A	A	C	A	A	A	C	C	G	A	T	C	T	C	T	T	G	T	A	G	A	T	C	G	T	T	C	T
165	Delta	>143738|1|265	G	G	T	T	T	A	T	A	C	C	T	T	C	C	C	A	G	G	T	A	A	C	A	A	A	C	C	G	A	T	C	T	C	T	T	G	T	A	G	A	T	C	G	T	T	C	T
166	Delta	>143737|1|265	G	G	T	T	T	A	T	A	C	C	T	T	C	C	C	A	G	G	T	A	A	C	A	A	A	C	C	G	A	T	C	T	C	T	T	G	T	A	G	A	T	C	G	T	T	C	T
167	Delta	>143736|1|265	G	G	T	T	T	A	T	A	C	C	T	T	C	C	C	A	G	G	T	A	A	C	A	A	A	C	C	G	A	T	C	T	C	T	T	G	T	A	G	A	T	C	G	T	T	C	T
168	Delta	>143735|1|265	G	G	T	T	T	A	T	A	C	C	T	T	C	C	C	A	G	G	T	A	A	C	A	A	A	C	C	G	A	T	C	T	C	T	T	G	T	A	G	A	T	C	G	T	T	C	T
169	Delta	>143734|1|265	G	G	T	T	T	A	T	A	C	C	T	T	C	C	C	A	G	G	T	A	A	C	A	A	A	C	C	G	A	T	C	T	C	T	T	G	T	A	G	A	T	C	G	T	T	C	T
170	Delta	>143733|1|265	G	G	T	T	T	A	T	A	C	C	T	T	C	C	C	A	G	G	T	A	A	C	A	A	A	C	C	G	A	T	C	T	C	T	T	G	T	A	G	A	T	C	G	T	T	C	T
171	Delta	>143732|1|265	G	G	T	T	T	A	T	A	C	C	T	T	C	C	C	A	G	G	T	A	A	C	A	A	A	C	C	G	A	T	C	T	C	T	T	G	T	A	G	A	T	C	G	T	T	C	T
172	Delta	>143731|1|265	G	G	T	T	T	A	T	A	C	C	T	T	C	C	C	A	G	G	T	A	A	C	A	A	A	C	C	G	A	T	C	T	C	T	T	G	T	A	G	A	T	C	G	T	T	C	T
173	Delta	>143730|1|265	G	G	T	T	T	A	T	A	C	C	T	T	C	C	C	A	G	G	T	A	A	C	A	A	A	C	C	G	A	T	C	T	C	T	T	G	T	A	G	A	T	C	G	T	T	C	T
174	Delta	>143728|1|265	G	G	T	T	T	A	T	A	C	C	T	T	C	C	C	A	G	G	T	A	A	C	A	A	A	C	C	G	A	T	C	T	C	T	T	G	T	A	G	A	T	C	G	T	T	C	T
175	Delta	>143727|1|265	G	G	T	T	T	A	T	A	C	C	T	T	C	C	C	A	G	G	T	A	A	C	A	A	A	C	C	G	A	T	C	T	C	T	T	G	T	A	G	A	T	C	G	T	T	C	T
176	Delta	>143726|1|265	G	G	T	T	T	A	T	A	C	C	T	T	C	C	C	A	G	G	T	A	A	C	A	A	A	C	C	G	A	T	C	T	C	T	T	G	T	A	G	A	T	C	G	T	T	C	T
177	Delta	>143725|1|265	G	G	T	T	T	A	T	A	C	C	T	T	C	C	C	A	G	G	T	A	A	C	A	A	A	C	C	G	A	T	C	T	C	T	T	G	T	A	G	A	T	C	G	T	T	C	T
178	Delta	>143724|1|265	G	G	T	T	T	A	T	A	C	C	T	T	C	C	C	A	G	G	T	A	A	C	A	A	A	C	C	G	A	T	C	T	C	T	T	G	T	A	G	A	T	C	G	T	T	C	T
179	Delta	>143723|1|265	G	G	T	T	T	A	T	A	C	C	T	T	C	C	C	A	G	G	T	A	A	C	A	A	A	C	C	G	A	T	C	T	C	T	T	G	T	A	G	A	T	C	G	T	T	C	T
180	Delta	>143722|1|265	G	G	T	T	T	A	T	A	C	C	T	T	C	C	C	A	G	G	T	A	A	C	A	A	A	C	C	G	A	T	C	T	C	T	T	G	T	A	G	A	T	C	G	T	T	C	T
181	Delta	>143721|1|265	G	G	T	T	T	A	T	A	C	C	T	T	C	C	C	A	G	G	T	A	A	C	A	A	A	C	C	G	A	T	C	T	C	T	T	G	T	A	G	A	T	C	G	T	T	C	T
182	Delta	>143720|1|265	G	G	T	T	T	A	T	A	C	C	T	T	C	C	C	A	G	G	T	A	A	C	A	A	A	C	C	G	A	T	C	T	C	T	T	G	T	A	G	A	T	C	G	T	T	C	T
183	Delta	>143719|1|265	G	G	T	T	T	A	T	A	C	C	T	T	C	C	C	A	G	G	T	A	A	C	A	A	A	C	C	G	A	T	C	T	C	T	T	G	T	A	G	A	T	C	G	T	T	C	T
184	Delta	>143718|1|265	G	G	T	T	T	A	T	A	C	C	T	T	C	C	C	A	G	G	T	A	A	C	A	A	A	C	C	G	A	T	C	T	C	T	T	G	T	A	G	A	T	C	G	T	T	C	T
185	Delta	>143715|1|265	G	G	T	T	T	A	T	A	C	C	T	T	C	C	C	A	G	G	T	A	A	C	A	A	A	C	C	G	A	T	C	T	C	T	T	G	T	A	G	A	T	C	G	T	T	C	T
186	Delta	>143714|1|265	G	G	T	T	T	A	T	A	C	C	T	T	C	C	C	A	G	G	T	A	A	C	A	A	A	C	C	G	A	T	C	T	C	T	T	G	T	A	G	A	T	C	G	T	T	C	T
187	Delta	>143713|1|265	G	G	T	T	T	A	T	A	C	C	T	T	C	C	C	A	G	G	T	A	A	C	A	A	A	C	C	G	A	T	C	T	C	T	T	G	T	A	G	A	T	C	G	T	T	C	T
188	Delta	>143712|1|265	G	G	T	T	T	A	T	A	C	C	T	T	C	C	C	A	G	G	T	A	A	C	A	A	A	C	C	G	A	T	C	T	C	T	T	G	T	A	G	A	T	C	G	T	T	C	T
189	Delta	>143711|1|265	G	G	T	T	T	A	T	A	C	C	T	T	C	C	C	A	G	G	T	A	A	C	A	A	A	C	C	G	A	T	C	T	C	T	T	G	T	A	G	A	T	C	G	T	T	C	T
190	Delta	>143710|1|265	G	G	T	T	T	A	T	A	C	C	T	T	C	C	C	A	G	G	T	A	A	C	A	A	A	C	C	G	A	T	C	T	C	T	T	G	T	A	G	A	T	C	G	T	T	C	T
191	Delta	>143709|1|265	G	G	T	T	T	A	T	A	C	C	T	T	C	C	C	A	G	G	T	A	A	C	A	A	A	C	C	G	A	T	C	T	C	T	T	G	T	A	G	A	T	C	G	T	T	C	T
192	Delta	>143708|1|265	G	G	T	T	T	A	T	A	C	C	T	T	C	C	C	A	G	G	T	A	A	C	A	A	A	C	C	G	A	T	C	T	C	T	T	G	T	A	G	A	T	C	G	T	T	C	T
193	Delta	>143707|1|265	G	G	T	T	T	A	T	A	C	C	T	T	C	C	C	A	G	G	T	A	A	C	A	A	A	C	C	G	A	T	C	T	C	T	T	G	T	A	G	A	T	C	G	T	T	C	T
194	Delta	>143706|1|265	G	G	T	T	T	A	T	A	C	C	T	T	C	C	C	A	G	G	T	A	A	C	A	A	A	C	C	G	A	T	C	T	C	T	T	G	T	A	G	A	T	C	G	T	T	C	T
195	Delta	>143705|1|265	G	G	T	T	T	A	T	A	C	C	T	T	C	C	C	A	G	G	T	A	A	C	A	A	A	C	C	G	A	T	C	T	C	T	T	G	T	A	G	A	T	C	G	T	T	C	T
196	Delta	>143704|1|265	G	G	T	T	T	A	T	A	C	C	T	T	C	C	C	A	G	G	T	A	A	C	A	A	A	C	C	G	A	T	C	T	C	T	T	G	T	A	G	A	T	C	G	T	T	C	T
197	Delta	>143703|1|265	G	G	T	T	T	A	T	A	C	C	T	T	C	C	C	A	G	G	T	A	A	C	A	A	A	C	C	G	A	T	C	T	C	T	T	G	T	A	G	A	T	C	G	T	T	C	T
198	Delta	>143702|1|265	G	G	T	T	T	A	T	A	C	C	T	T	C	C	C	A	G	G	T	A	A	C	A	A	A	C	C	G	A	T	C	T	C	T	T	G	T	A	G	A	T	C	G	T	T	C	T
199	Delta	>143701|1|265	G	G	T	T	T	A	T	A	C	C	T	T	C	C	C	A	G	G	T	A	A	C	A	A	A	C	C	G	A	T	C	T	C	T	T	G	T	A	G	A	T	C	G	T	T	C	T
200	Delta	>143700|1|265	G	G	T	T	T	A	T	A	C	C	T	T	C	C	C	A	G	G	T	A	A	C	A	A	A	C	C	G	A	T	C	T	C	T	T	G	T	A	G	A	T	C	G	T	T	C	T
201	Delta	>143699|1|265	G	G	T	T	T	A	T	A	C	C	T	T	C	C	C	A	G	G	T	A	A	C	A	A	A	C	C	G	A	T	C	T	C	T	T	G	T	A	G	A	T	C	G	T	T	C	T
202	Delta	>143698|1|265	G	G	T	T	T	A	T	A	C	C	T	T	C	C	C	A	G	G	T	A	A	C	A	A	A	C	C	G	A	T	C	T	C	T	T	G	T	A	G	A	T	C	G	T	T	C	T
203	Delta	>143697|1|265	G	G	T	T	T	A	T	A	C	C	T	T	C	C	C	A	G	G	T	A	A	C	A	A	A	C	C	G	A	T	C	T	C	T	T	G	T	A	G	A	T	C	G	T	T	C	T
204	Delta	>143696|1|265	G	G	T	T	T	A	T	A	C	C	T	T	C	C	C	A	G	G	T	A	A	C	A	A	A	C	C	G	A	T	C	T	C	T	T	G	T	A	G	A	T	C	G	T	T	C	T
205	Delta	>143695|1|265	G	G	T	T	T	A	T	A	C	C	T	T	C	C	C	A	G	G	T	A	A	C	A	A	A	C	C	G	A	T	C	T	C	T	T	G	T	A	G	A	T	C	G	T	T	C	T
206	Delta	>143694|1|265	G	G	T	T	T	A	T	A	C	C	T	T	C	C	C	A	G	G	T	A	A	C	A	A	A	C	C	G	A	T	C	T	C	T	T	G	T	A	G	A	T	C	G	T	T	C	T
207	Delta	>143693|1|265	G	G	T	T	T	A	T	A	C	C	T	T	C	C	C	A	G	G	T	A	A	C	A	A	A	C	C	G	A	T	C	T	C	T	T	G	T	A	G	A	T	C	G	T	T	C	T
208	Delta	>143692|1|265	G	G	T	T	T	A	T	A	C	C	T	T	C	C	C	A	G	G	T	A	A	C	A	A	A	C	C	G	A	T	C	T	C	T	T	G	T	A	G	A	T	C	G	T	T	C	T
209	Delta	>143691|1|265	G	G	T	T	T	A	T	A	C	C	T	T	C	C	C	A	G	G	T	A	A	C	A	A	A	C	C	G	A	T	C	T	C	T	T	G	T	A	G	A	T	C	G	T	T	C	T
210	Delta	>143690|1|265	G	G	T	T	T	A	T	A	C	C	T	T	C	C	C	A	G	G	T	A	A	C	A	A	A	C	C	G	A	T	C	T	C	T	T	G	T	A	G	A	T	C	G	T	T	C	T
211	Delta	>143689|1|265	G	G	T	T	T	A	T	A	C	C	T	T	C	C	C	A	G	G	T	A	A	C	A	A	A	C	C	G	A	T	C	T	C	T	T	G	T	A	G	A	T	C	G	T	T	C	T
212	Delta	>143688|1|265	G	G	T	T	T	A	T	A	C	C	T	T	C	C	C	A	G	G	T	A	A	C	A	A	A	C	C	G	A	T	C	T	C	T	T	G	T	A	G	A	T	C	G	T	T	C	T
213	Delta	>143687|1|265	G	G	T	T	T	A	T	A	C	C	T	T	C	C	C	A	G	G	T	A	A	C	A	A	A	C	C	G	A	T	C	T	C	T	T	G	T	A	G	A	T	C	G	T	T	C	T
214	Delta	>143686|1|265	G	G	T	T	T	A	T	A	C	C	T	T	C	C	C	A	G	G	T	A	A	C	A	A	A	C	C	G	A	T	C	T	C	T	T	G	T	A	G	A	T	C	G	T	T	C	T
215	Delta	>143684|1|265	G	G	T	T	T	A	T	A	C	C	T	T	C	C	C	A	G	G	T	A	A	C	A	A	A	C	C	G	A	T	C	T	C	T	T	G	T	A	G	A	T	C	G	T	T	C	T
216	Delta	>143683|1|265	G	G	T	T	T	A	T	A	C	C	T	T	C	C	C	A	G	G	T	A	A	C	A	A	A	C	C	G	A	T	C	T	C	T	T	G	T	A	G	A	T	C	G	T	T	C	T
217	Delta	>143682|1|265	G	G	T	T	T	A	T	A	C	C	T	T	C	C	C	A	G	G	T	A	A	C	A	A	A	C	C	G	A	T	C	T	C	T	T	G	T	A	G	A	T	C	G	T	T	C	T
218	Delta	>143681|1|265	G	G	T	T	T	A	T	A	C	C	T	T	C	C	C	A	G	G	T	A	A	C	A	A	A	C	C	G	A	T	C	T	C	T	T	G	T	A	G	A	T	C	G	T	T	C	T
219	Delta	>143680|1|265	G	G	T	T	T	A	T	A	C	C	T	T	C	C	C	A	G	G	T	A	A	C	A	A	A	C	C	G	A	T	C	T	C	T	T	G	T	A	G	A	T	C	G	T	T	C	T
220	Delta	>143679|1|265	G	G	T	T	T	A	T	A	C	C	T	T	C	C	C	A	G	G	T	A	A	C	A	A	A	C	C	G	A	T	C	T	C	T	T	G	T	A	G	A	T	C	G	T	T	C	T
221	Delta	>143678|1|265	G	G	T	T	T	A	T	A	C	C	T	T	C	C	C	A	G	G	T	A	A	C	A	A	A	C	C	G	A	T	C	T	C	T	T	G	T	A	G	A	T	C	G	T	T	C	T
222	Delta	>143677|1|265	G	G	T	T	T	A	T	A	C	C	T	T	C	C	C	A	G	G	T	A	A	C	A	A	A	C	C	G	A	T	C	T	C	T	T	G	T	A	G	A	T	C	G	T	T	C	T
223	Delta	>143676|1|265	G	G	T	T	T	A	T	A	C	C	T	T	C	C	C	A	G	G	T	A	A	C	A	A	A	C	C	G	A	T	C	T	C	T	T	G	T	A	G	A	T	C	G	T	T	C	T
224	Delta	>143675|1|265	G	G	T	T	T	A	T	A	C	C	T	T	C	C	C	A	G	G	T	A	A	C	A	A	A	C	C	G	A	T	C	T	C	T	T	G	T	A	G	A	T	C	G	T	T	C	T
225	Delta	>143674|1|265	G	G	T	T	T	A	T	A	C	C	T	T	C	C	C	A	G	G	T	A	A	C	A	A	A	C	C	G	A	T	C	T	C	T	T	G	T	A	G	A	T	C	G	T	T	C	T
226	Delta	>143673|1|265	G	G	T	T	T	A	T	A	C	C	T	T	C	C	C	A	G	G	T	A	A	C	A	A	A	C	C	G	A	T	C	T	C	T	T	G	T	A	G	A	T	C	G	T	T	C	T
227	Delta	>143672|1|265	G	G	T	T	T	A	T	A	C	C	T	T	C	C	C	A	G	G	T	A	A	C	A	A	A	C	C	G	A	T	C	T	C	T	T	G	T	A	G	A	T	C	G	T	T	C	T
228	Delta	>143671|1|265	G	G	T	T	T	A	T	A	C	C	T	T	C	C	C	A	G	G	T	A	A	C	A	A	A	C	C	G	A	T	C	T	C	T	T	G	T	A	G	A	T	C	G	T	T	C	T
229	Delta	>143670|1|265	G	G	T	T	T	A	T	A	C	C	T	T	C	C	C	A	G	G	T	A	A	C	A	A	A	C	C	G	A	T	C	T	C	T	T	G	T	A	G	A	T	C	G	T	T	C	T
230	Delta	>143669|1|265	G	G	T	T	T	A	T	A	C	C	T	T	C	C	C	A	G	G	T	A	A	C	A	A	A	C	C	G	A	T	C	T	C	T	T	G	T	A	G	A	T	C	G	T	T	C	T
231	Delta	>143668|1|265	G	G	T	T	T	A	T	A	C	C	T	T	C	C	C	A	G	G	T	A	A	C	A	A	A	C	C	G	A	T	C	T	C	T	T	G	T	A	G	A	T	C	G	T	T	C	T
232	Delta	>143667|1|265	G	G	T	T	T	A	T	A	C	C	T	T	C	C	C	A	G	G	T	A	A	C	A	A	A	C	C	G	A	T	C	T	C	T	T	G	T	A	G	A	T	C	G	T	T	C	T
233	Delta	>143666|1|265	G	G	T	T	T	A	T	A	C	C	T	T	C	C	C	A	G	G	T	A	A	C	A	A	A	C	C	G	A	T	C	T	C	T	T	G	T	A	G	A	T	C	G	T	T	C	T
234	Delta	>143665|1|265	G	G	T	T	T	A	T	A	C	C	T	T	C	C	C	A	G	G	T	A	A	C	A	A	A	C	C	G	A	T	C	T	C	T	T	G	T	A	G	A	T	C	G	T	T	C	T
235	Delta	>143664|1|265	G	G	T	T	T	A	T	A	C	C	T	T	C	C	C	A	G	G	T	A	A	C	A	A	A	C	C	G	A	T	C	T	C	T	T	G	T	A	G	A	T	C	G	T	T	C	T
236	Delta	>143663|1|265	G	G	T	T	T	A	T	A	C	C	T	T	C	C	C	A	G	G	T	A	A	C	A	A	A	C	C	G	A	T	C	T	C	T	T	G	T	A	G	A	T	C	G	T	T	C	T
237	Delta	>143662|1|265	G	G	T	T	T	A	T	A	C	C	T	T	C	C	C	A	G	G	T	A	A	C	A	A	A	C	C	G	A	T	C	T	C	T	T	G	T	A	G	A	T	C	G	T	T	C	T
238	Delta	>143661|1|265	G	G	T	T	T	A	T	A	C	C	T	T	C	C	C	A	G	G	T	A	A	C	A	A	A	C	C	G	A	T	C	T	C	T	T	G	T	A	G	A	T	C	G	T	T	C	T
239	Delta	>143660|1|265	G	G	T	T	T	A	T	A	C	C	T	T	C	C	C	A	G	G	T	A	A	C	A	A	A	C	C	G	A	T	C	T	C	T	T	G	T	A	G	A	T	C	G	T	T	C	T
240	Delta	>143659|1|265	G	G	T	T	T	A	T	A	C	C	T	T	C	C	C	A	G	G	T	A	A	C	A	A	A	C	C	G	A	T	C	T	C	T	T	G	T	A	G	A	T	C	G	T	T	C	T
241	Delta	>143658|1|265	G	G	T	T	T	A	T	A	C	C	T	T	C	C	C	A	G	G	T	A	A	C	A	A	A	C	C	G	A	T	C	T	C	T	T	G	T	A	G	A	T	C	G	T	T	C	T
242	Delta	>143657|1|265	G	G	T	T	T	A	T	A	C	C	T	T	C	C	C	A	G	G	T	A	A	C	A	A	A	C	C	G	A	T	C	T	C	T	T	G	T	A	G	A	T	C	G	T	T	C	T
243	Delta	>143656|1|265	G	G	T	T	T	A	T	A	C	C	T	T	C	C	C	A	G	G	T	A	A	C	A	A	A	C	C	G	A	T	C	T	C	T	T	G	T	A	G	A	T	C	G	T	T	C	T
244	Delta	>143655|1|265	G	G	T	T	T	A	T	A	C	C	T	T	C	C	C	A	G	G	T	A	A	C	A	A	A	C	C	G	A	T	C	T	C	T	T	G	T	A	G	A	T	C	G	T	T	C	T
245	Delta	>143654|1|265	G	G	T	T	T	A	T	A	C	C	T	T	C	C	C	A	G	G	T	A	A	C	A	A	A	C	C	G	A	T	C	T	C	T	T	G	T	A	G	A	T	C	G	T	T	C	T
246	Delta	>143653|1|265	G	G	T	T	T	A	T	A	C	C	T	T	C	C	C	A	G	G	T	A	A	C	A	A	A	C	C	G	A	T	C	T	C	T	T	G	T	A	G	A	T	C	G	T	T	C	T
247	Delta	>143652|1|265	G	G	T	T	T	A	T	A	C	C	T	T	C	C	C	A	G	G	T	A	A	C	A	A	A	C	C	G	A	T	C	T	C	T	T	G	T	A	G	A	T	C	G	T	T	C	T
248	Delta	>143651|1|265	G	G	T	T	T	A	T	A	C	C	T	T	C	C	C	A	G	G	T	A	A	C	A	A	A	C	C	G	A	T	C	T	C	T	T	G	T	A	G	A	T	C	G	T	T	C	T
249	Delta	>143650|1|265	G	G	T	T	T	A	T	A	C	C	T	T	C	C	C	A	G	G	T	A	A	C	A	A	A	C	C	G	A	T	C	T	C	T	T	G	T	A	G	A	T	C	G	T	T	C	T
250	Delta	>143649|1|265	G	G	T	T	T	A	T	A	C	C	T	T	C	C	C	A	G	G	T	A	A	C	A	A	A	C	C	G	A	T	C	T	C	T	T	G	T	A	G	A	T	C	G	T	T	C	T
251	Delta	>143648|1|265	G	G	T	T	T	A	T	A	C	C	T	T	C	C	C	A	G	G	T	A	A	C	A	A	A	C	C	G	A	T	C	T	C	T	T	G	T	A	G	A	T	C	G	T	T	C	T
252	Delta	>143647|1|265	G	G	T	T	T	A	T	A	C	C	T	T	C	C	C	A	G	G	T	A	A	C	A	A	A	C	C	G	A	T	C	T	C	T	T	G	T	A	G	A	T	C	G	T	T	C	T
253	Delta	>143646|1|265	G	G	T	T	T	A	T	A	C	C	T	T	C	C	C	A	G	G	T	A	A	C	A	A	A	C	C	G	A	T	C	T	C	T	T	G	T	A	G	A	T	C	G	T	T	C	T
254	Delta	>143645|1|265	G	G	T	T	T	A	T	A	C	C	T	T	C	C	C	A	G	G	T	A	A	C	A	A	A	C	C	G	A	T	C	T	C	T	T	G	T	A	G	A	T	C	G	T	T	C	T
255	Delta	>143644|1|265	G	G	T	T	T	A	T	A	C	C	T	T	C	C	C	A	G	G	T	A	A	C	A	A	A	C	C	G	A	T	C	T	C	T	T	G	T	A	G	A	T	C	G	T	T	C	T
256	Delta	>143643|1|265	G	G	T	T	T	A	T	A	C	C	T	T	C	C	C	A	G	G	T	A	A	C	A	A	A	C	C	G	A	T	C	T	C	T	T	G	T	A	G	A	T	C	G	T	T	C	T
257	Delta	>143642|1|265	G	G	T	T	T	A	T	A	C	C	T	T	C	C	C	A	G	G	T	A	A	C	A	A	A	C	C	G	A	T	C	T	C	T	T	G	T	A	G	A	T	C	G	T	T	C	T
258	Delta	>143641|1|265	G	G	T	T	T	A	T	A	C	C	T	T	C	C	C	A	G	G	T	A	A	C	A	A	A	C	C	G	A	T	C	T	C	T	T	G	T	A	G	A	T	C	G	T	T	C	T
259	Delta	>143640|1|265	G	G	T	T	T	A	T	A	C	C	T	T	C	C	C	A	G	G	T	A	A	C	A	A	A	C	C	G	A	T	C	T	C	T	T	G	T	A	G	A	T	C	G	T	T	C	T
260	Delta	>143639|1|265	G	G	T	T	T	A	T	A	C	C	T	T	C	C	C	A	G	G	T	A	A	C	A	A	A	C	C	G	A	T	C	T	C	T	T	G	T	A	G	A	T	C	G	T	T	C	T
261	Delta	>143638|1|265	G	G	T	T	T	A	T	A	C	C	T	T	C	C	C	A	G	G	T	A	A	C	A	A	A	C	C	G	A	T	C	T	C	T	T	G	T	A	G	A	T	C	G	T	T	C	T
262	Delta	>143637|1|265	G	G	T	T	T	A	T	A	C	C	T	T	C	C	C	A	G	G	T	A	A	C	A	A	A	C	C	G	A	T	C	T	C	T	T	G	T	A	G	A	T	C	G	T	T	C	T
263	Delta	>143636|1|265	G	G	T	T	T	A	T	A	C	C	T	T	C	C	C	A	G	G	T	A	A	C	A	A	A	C	C	G	A	T	C	T	C	T	T	G	T	A	G	A	T	C	G	T	T	C	T
264	Delta	>143635|1|265	G	G	T	T	T	A	T	A	C	C	T	T	C	C	C	A	G	G	T	A	A	C	A	A	A	C	C	G	A	T	C	T	C	T	T	G	T	A	G	A	T	C	G	T	T	C	T
265	Delta	>143634|1|265	G	G	T	T	T	A	T	A	C	C	T	T	C	C	C	A	G	G	T	A	A	C	A	A	A	C	C	G	A	T	C	T	C	T	T	G	T	A	G	A	T	C	G	T	T	C	T
266	Delta	>143633|1|265	G	G	T	T	T	A	T	A	C	C	T	T	C	C	C	A	G	G	T	A	A	C	A	A	A	C	C	G	A	T	C	T	C	T	T	G	T	A	G	A	T	C	G	T	T	C	T
267	Delta	>143632|1|265	G	G	T	T	T	A	T	A	C	C	T	T	C	C	C	A	G	G	T	A	A	C	A	A	A	C	C	G	A	T	C	T	C	T	T	G	T	A	G	A	T	C	G	T	T	C	T
268	Delta	>143631|1|265	G	G	T	T	T	A	T	A	C	C	T	T	C	C	C	A	G	G	T	A	A	C	A	A	A	C	C	G	A	T	C	T	C	T	T	G	T	A	G	A	T	C	G	T	T	C	T
269	Delta	>143630|1|265	G	G	T	T	T	A	T	A	C	C	T	T	C	C	C	A	G	G	T	A	A	C	A	A	A	C	C	G	A	T	C	T	C	T	T	G	T	A	G	A	T	C	G	T	T	C	T
270	Delta	>143629|1|265	G	G	T	T	T	A	T	A	C	C	T	T	C	C	C	A	G	G	T	A	A	C	A	A	A	C	C	G	A	T	C	T	C	T	T	G	T	A	G	A	T	C	G	T	T	C	T
271	Delta	>143628|1|265	G	G	T	T	T	A	T	A	C	C	T	T	C	C	C	A	G	G	T	A	A	C	A	A	A	C	C	G	A	T	C	T	C	T	T	G	T	A	G	A	T	C	G	T	T	C	T
272	Delta	>143626|1|265	G	G	T	T	T	A	T	A	C	C	T	T	C	C	C	A	G	G	T	A	A	C	A	A	A	C	C	G	A	T	C	T	C	T	T	G	T	A	G	A	T	C	G	T	T	C	T
273	Delta	>143625|1|265	G	G	T	T	T	A	T	A	C	C	T	T	C	C	C	A	G	G	T	A	A	C	A	A	A	C	C	G	A	T	C	T	C	T	T	G	T	A	G	A	T	C	G	T	T	C	T
274	Delta	>143624|1|265	G	G	T	T	T	A	T	A	C	C	T	T	C	C	C	A	G	G	T	A	A	C	A	A	A	C	C	G	A	T	C	T	C	T	T	G	T	A	G	A	T	C	G	T	T	C	T
275	Delta	>143623|1|265	G	G	T	T	T	A	T	A	C	C	T	T	C	C	C	A	G	G	T	A	A	C	A	A	A	C	C	G	A	T	C	T	C	T	T	G	T	A	G	A	T	C	G	T	T	C	T
276	Delta	>143622|1|265	G	G	T	T	T	A	T	A	C	C	T	T	C	C	C	A	G	G	T	A	A	C	A	A	A	C	C	G	A	T	C	T	C	T	T	G	T	A	G	A	T	C	G	T	T	C	T
277	Delta	>143621|1|265	G	G	T	T	T	A	T	A	C	C	T	T	C	C	C	A	G	G	T	A	A	C	A	A	A	C	C	G	A	T	C	T	C	T	T	G	T	A	G	A	T	C	G	T	T	C	T
278	Delta	>143619|1|265	G	G	T	T	T	A	T	A	C	C	T	T	C	C	C	A	G	G	T	A	A	C	A	A	A	C	C	G	A	T	C	T	C	T	T	G	T	A	G	A	T	C	G	T	T	C	T
279	Delta	>143618|1|265	G	G	T	T	T	A	T	A	C	C	T	T	C	C	C	A	G	G	T	A	A	C	A	A	A	C	C	G	A	T	C	T	C	T	T	G	T	A	G	A	T	C	G	T	T	C	T
280	Delta	>143617|1|265	G	G	T	T	T	A	T	A	C	C	T	T	C	C	C	A	G	G	T	A	A	C	A	A	A	C	C	G	A	T	C	T	C	T	T	G	T	A	G	A	T	C	G	T	T	C	T
281	Delta	>143616|1|265	G	G	T	T	T	A	T	A	C	C	T	T	C	C	C	A	G	G	T	A	A	C	A	A	A	C	C	G	A	T	C	T	C	T	T	G	T	A	G	A	T	C	G	T	T	C	T
282	Delta	>143615|1|265	G	G	T	T	T	A	T	A	C	C	T	T	C	C	C	A	G	G	T	A	A	C	A	A	A	C	C	G	A	T	C	T	C	T	T	G	T	A	G	A	T	C	G	T	T	C	T
283	Delta	>143614|1|265	G	G	T	T	T	A	T	A	C	C	T	T	C	C	C	A	G	G	T	A	A	C	A	A	A	C	C	G	A	T	C	T	C	T	T	G	T	A	G	A	T	C	G	T	T	C	T
284	Delta	>143613|1|265	G	G	T	T	T	A	T	A	C	C	T	T	C	C	C	A	G	G	T	A	A	C	A	A	A	C	C	G	A	T	C	T	C	T	T	G	T	A	G	A	T	C	G	T	T	C	T
285	Delta	>143611|1|265	G	G	T	T	T	A	T	A	C	C	T	T	C	C	C	A	G	G	T	A	A	C	A	A	A	C	C	G	A	T	C	T	C	T	T	G	T	A	G	A	T	C	G	T	T	C	T
286	Delta	>143610|1|265	G	G	T	T	T	A	T	A	C	C	T	T	C	C	C	A	G	G	T	A	A	C	A	A	A	C	C	G	A	T	C	T	C	T	T	G	T	A	G	A	T	C	G	T	T	C	T
287	Delta	>143609|1|265	G	G	T	T	T	A	T	A	C	C	T	T	C	C	C	A	G	G	T	A	A	C	A	A	A	C	C	G	A	T	C	T	C	T	T	G	T	A	G	A	T	C	G	T	T	C	T
288	Delta	>143608|1|265	G	G	T	T	T	A	T	A	C	C	T	T	C	C	C	A	G	G	T	A	A	C	A	A	A	C	C	G	A	T	C	T	C	T	T	G	T	A	G	A	T	C	G	T	T	C	T
289	Delta	>143607|1|265	G	G	T	T	T	A	T	A	C	C	T	T	C	C	C	A	G	G	T	A	A	C	A	A	A	C	C	G	A	T	C	T	C	T	T	G	T	A	G	A	T	C	G	T	T	C	T
290	Delta	>143606|1|265	G	G	T	T	T	A	T	A	C	C	T	T	C	C	C	A	G	G	T	A	A	C	A	A	A	C	C	G	A	T	C	T	C	T	T	G	T	A	G	A	T	C	G	T	T	C	T
291	Delta	>143605|1|265	G	G	T	T	T	A	T	A	C	C	T	T	C	C	C	A	G	G	T	A	A	C	A	A	A	C	C	G	A	T	C	T	C	T	T	G	T	A	G	A	T	C	G	T	T	C	T
292	Delta	>143603|1|265	G	G	T	T	T	A	T	A	C	C	T	T	C	C	C	A	G	G	T	A	A	C	A	A	A	C	C	G	A	T	C	T	C	T	T	G	T	A	G	A	T	C	G	T	T	C	T
293	Delta	>143602|1|265	G	G	T	T	T	A	T	A	C	C	T	T	C	C	C	A	G	G	T	A	A	C	A	A	A	C	C	G	A	T	C	T	C	T	T	G	T	A	G	A	T	C	G	T	T	C	T
294	Delta	>143601|1|265	G	G	T	T	T	A	T	A	C	C	T	T	C	C	C	A	G	G	T	A	A	C	A	A	A	C	C	G	A	T	C	T	C	T	T	G	T	A	G	A	T	C	G	T	T	C	T
295	Delta	>143600|1|265	G	G	T	T	T	A	T	A	C	C	T	T	C	C	C	A	G	G	T	A	A	C	A	A	A	C	C	G	A	T	C	T	C	T	T	G	T	A	G	A	T	C	G	T	T	C	T
296	Delta	>143599|1|265	G	G	T	T	T	A	T	A	C	C	T	T	C	C	C	A	G	G	T	A	A	C	A	A	A	C	C	G	A	T	C	T	C	T	T	G	T	A	G	A	T	C	G	T	T	C	T
297	Delta	>143598|1|265	G	G	T	T	T	A	T	A	C	C	T	T	C	C	C	A	G	G	T	A	A	C	A	A	A	C	C	G	A	T	C	T	C	T	T	G	T	A	G	A	T	C	G	T	T	C	T
298	Delta	>143597|1|265	G	G	T	T	T	A	T	A	C	C	T	T	C	C	C	A	G	G	T	A	A	C	A	A	A	C	C	G	A	T	C	T	C	T	T	G	T	A	G	A	T	C	G	T	T	C	T
299	Delta	>143596|1|265	G	G	T	T	T	A	T	A	C	C	T	T	C	C	C	A	G	G	T	A	A	C	A	A	A	C	C	G	A	T	C	T	C	T	T	G	T	A	G	A	T	C	G	T	T	C	T
300	Delta	>143595|1|265	G	G	T	T	T	A	T	A	C	C	T	T	C	C	C	A	G	G	T	A	A	C	A	A	A	C	C	G	A	T	C	T	C	T	T	G	T	A	G	A	T	C	G	T	T	C	T
301	Delta	>143594|1|265	G	G	T	T	T	A	T	A	C	C	T	T	C	C	C	A	G	G	T	A	A	C	A	A	A	C	C	G	A	T	C	T	C	T	T	G	T	A	G	A	T	C	G	T	T	C	T
302	Delta	>143593|1|265	G	G	T	T	T	A	T	A	C	C	T	T	C	C	C	A	G	G	T	A	A	C	A	A	A	C	C	G	A	T	C	T	C	T	T	G	T	A	G	A	T	C	G	T	T	C	T
303	Delta	>143592|1|265	G	G	T	T	T	A	T	A	C	C	T	T	C	C	C	A	G	G	T	A	A	C	A	A	A	C	C	G	A	T	C	T	C	T	T	G	T	A	G	A	T	C	G	T	T	C	T
304	Delta	>143591|1|265	G	G	T	T	T	A	T	A	C	C	T	T	C	C	C	A	G	G	T	A	A	C	A	A	A	C	C	G	A	T	C	T	C	T	T	G	T	A	G	A	T	C	G	T	T	C	T
305	Delta	>143590|1|265	G	G	T	T	T	A	T	A	C	C	T	T	C	C	C	A	G	G	T	A	A	C	A	A	A	C	C	G	A	T	C	T	C	T	T	G	T	A	G	A	T	C	G	T	T	C	T
306	Delta	>143589|1|265	G	G	T	T	T	A	T	A	C	C	T	T	C	C	C	A	G	G	T	A	A	C	A	A	A	C	C	G	A	T	C	T	C	T	T	G	T	A	G	A	T	C	G	T	T	C	T
307	Delta	>143588|1|265	G	G	T	T	T	A	T	A	C	C	T	T	C	C	C	A	G	G	T	A	A	C	A	A	A	C	C	G	A	T	C	T	C	T	T	G	T	A	G	A	T	C	G	T	T	C	T
308	Delta	>143587|1|265	G	G	T	T	T	A	T	A	C	C	T	T	C	C	C	A	G	G	T	A	A	C	A	A	A	C	C	G	A	T	C	T	C	T	T	G	T	A	G	A	T	C	G	T	T	C	T
309	Delta	>143586|1|265	G	G	T	T	T	A	T	A	C	C	T	T	C	C	C	A	G	G	T	A	A	C	A	A	A	C	C	G	A	T	C	T	C	T	T	G	T	A	G	A	T	C	G	T	T	C	T
310	Delta	>143585|1|265	G	G	T	T	T	A	T	A	C	C	T	T	C	C	C	A	G	G	T	A	A	C	A	A	A	C	C	G	A	T	C	T	C	T	T	G	T	A	G	A	T	C	G	T	T	C	T
311	Delta	>143584|1|265	G	G	T	T	T	A	T	A	C	C	T	T	C	C	C	A	G	G	T	A	A	C	A	A	A	C	C	G	A	T	C	T	C	T	T	G	T	A	G	A	T	C	G	T	T	C	T
312	Delta	>143583|1|265	G	G	T	T	T	A	T	A	C	C	T	T	C	C	C	A	G	G	T	A	A	C	A	A	A	C	C	G	A	T	C	T	C	T	T	G	T	A	G	A	T	C	G	T	T	C	T
313	Delta	>143582|1|265	G	G	T	T	T	A	T	A	C	C	T	T	C	C	C	A	G	G	T	A	A	C	A	A	A	C	C	G	A	T	C	T	C	T	T	G	T	A	G	A	T	C	G	T	T	C	T
314	Delta	>143581|1|265	G	G	T	T	T	A	T	A	C	C	T	T	C	C	C	A	G	G	T	A	A	C	A	A	A	C	C	G	A	T	C	T	C	T	T	G	T	A	G	A	T	C	G	T	T	C	T
315	Delta	>143580|1|265	G	G	T	T	T	A	T	A	C	C	T	T	C	C	C	A	G	G	T	A	A	C	A	A	A	C	C	G	A	T	C	T	C	T	T	G	T	A	G	A	T	C	G	T	T	C	T
316	Delta	>143579|1|265	G	G	T	T	T	A	T	A	C	C	T	T	C	C	C	A	G	G	T	A	A	C	A	A	A	C	C	G	A	T	C	T	C	T	T	G	T	A	G	A	T	C	G	T	T	C	T
317	Delta	>143578|1|265	G	G	T	T	T	A	T	A	C	C	T	T	C	C	C	A	G	G	T	A	A	C	A	A	A	C	C	G	A	T	C	T	C	T	T	G	T	A	G	A	T	C	G	T	T	C	T
318	Delta	>143575|1|265	G	G	T	T	T	A	T	A	C	C	T	T	C	C	C	A	G	G	T	A	A	C	A	A	A	C	C	G	A	T	C	T	C	T	T	G	T	A	G	A	T	C	G	T	T	C	T
319	Delta	>143574|1|265	G	G	T	T	T	A	T	A	C	C	T	T	C	C	C	A	G	G	T	A	A	C	A	A	A	C	C	G	A	T	C	T	C	T	T	G	T	A	G	A	T	C	G	T	T	C	T
320	Delta	>143573|1|265	G	G	T	T	T	A	T	A	C	C	T	T	C	C	C	A	G	G	T	A	A	C	A	A	A	C	C	G	A	T	C	T	C	T	T	G	T	A	G	A	T	C	G	T	T	C	T
321	Delta	>143572|1|265	G	G	T	T	T	A	T	A	C	C	T	T	C	C	C	A	G	G	T	A	A	C	A	A	A	C	C	G	A	T	C	T	C	T	T	G	T	A	G	A	T	C	G	T	T	C	T
322	Delta	>143571|1|265	G	G	T	T	T	A	T	A	C	C	T	T	C	C	C	A	G	G	T	A	A	C	A	A	A	C	C	G	A	T	C	T	C	T	T	G	T	A	G	A	T	C	G	T	T	C	T
323	Delta	>143570|1|265	G	G	T	T	T	A	T	A	C	C	T	T	C	C	C	A	G	G	T	A	A	C	A	A	A	C	C	G	A	T	C	T	C	T	T	G	T	A	G	A	T	C	G	T	T	C	T
324	Delta	>143569|1|265	G	G	T	T	T	A	T	A	C	C	T	T	C	C	C	A	G	G	T	A	A	C	A	A	A	C	C	G	A	T	C	T	C	T	T	G	T	A	G	A	T	C	G	T	T	C	T
325	Delta	>143568|1|265	G	G	T	T	T	A	T	A	C	C	T	T	C	C	C	A	G	G	T	A	A	C	A	A	A	C	C	G	A	T	C	T	C	T	T	G	T	A	G	A	T	C	G	T	T	C	T
326	Delta	>143567|1|265	G	G	T	T	T	A	T	A	C	C	T	T	C	C	C	A	G	G	T	A	A	C	A	A	A	C	C	G	A	T	C	T	C	T	T	G	T	A	G	A	T	C	G	T	T	C	T
327	Delta	>143566|1|265	G	G	T	T	T	A	T	A	C	C	T	T	C	C	C	A	G	G	T	A	A	C	A	A	A	C	C	G	A	T	C	T	C	T	T	G	T	A	G	A	T	C	G	T	T	C	T
328	Delta	>143565|1|265	G	G	T	T	T	A	T	A	C	C	T	T	C	C	C	A	G	G	T	A	A	C	A	A	A	C	C	G	A	T	C	T	C	T	T	G	T	A	G	A	T	C	G	T	T	C	T
329	Delta	>143564|1|265	G	G	T	T	T	A	T	A	C	C	T	T	C	C	C	A	G	G	T	A	A	C	A	A	A	C	C	G	A	T	C	T	C	T	T	G	T	A	G	A	T	C	G	T	T	C	T
330	Delta	>143563|1|265	G	G	T	T	T	A	T	A	C	C	T	T	C	C	C	A	G	G	T	A	A	C	A	A	A	C	C	G	A	T	C	T	C	T	T	G	T	A	G	A	T	C	G	T	T	C	T
331	Delta	>143562|1|265	G	G	T	T	T	A	T	A	C	C	T	T	C	C	C	A	G	G	T	A	A	C	A	A	A	C	C	G	A	T	C	T	C	T	T	G	T	A	G	A	T	C	G	T	T	C	T
332	Delta	>143561|1|265	G	G	T	T	T	A	T	A	C	C	T	T	C	C	C	A	G	G	T	A	A	C	A	A	A	C	C	G	A	T	C	T	C	T	T	G	T	A	G	A	T	C	G	T	T	C	T
333	Delta	>143560|1|265	G	G	T	T	T	A	T	A	C	C	T	T	C	C	C	A	G	G	T	A	A	C	A	A	A	C	C	G	A	T	C	T	C	T	T	G	T	A	G	A	T	C	G	T	T	C	T
334	Delta	>143559|1|265	G	G	T	T	T	A	T	A	C	C	T	T	C	C	C	A	G	G	T	A	A	C	A	A	A	C	C	G	A	T	C	T	C	T	T	G	T	A	G	A	T	C	G	T	T	C	T
335	Delta	>143558|1|265	G	G	T	T	T	A	T	A	C	C	T	T	C	C	C	A	G	G	T	A	A	C	A	A	A	C	C	G	A	T	C	T	C	T	T	G	T	A	G	A	T	C	G	T	T	C	T
336	Delta	>143557|1|265	G	G	T	T	T	A	T	A	C	C	T	T	C	C	C	A	G	G	T	A	A	C	A	A	A	C	C	G	A	T	C	T	C	T	T	G	T	A	G	A	T	C	G	T	T	C	T
337	Delta	>143556|1|265	G	G	T	T	T	A	T	A	C	C	T	T	C	C	C	A	G	G	T	A	A	C	A	A	A	C	C	G	A	T	C	T	C	T	T	G	T	A	G	A	T	C	G	T	T	C	T
338	Delta	>143555|1|265	G	G	T	T	T	A	T	A	C	C	T	T	C	C	C	A	G	G	T	A	A	C	A	A	A	C	C	G	A	T	C	T	C	T	T	G	T	A	G	A	T	C	G	T	T	C	T
339	Delta	>143554|1|265	G	G	T	T	T	A	T	A	C	C	T	T	C	C	C	A	G	G	T	A	A	C	A	A	A	C	C	G	A	T	C	T	C	T	T	G	T	A	G	A	T	C	G	T	T	C	T
340	Delta	>143553|1|265	G	G	T	T	T	A	T	A	C	C	T	T	C	C	C	A	G	G	T	A	A	C	A	A	A	C	C	G	A	T	C	T	C	T	T	G	T	A	G	A	T	C	G	T	T	C	T
341	Delta	>143552|1|265	G	G	T	T	T	A	T	A	C	C	T	T	C	C	C	A	G	G	T	A	A	C	A	A	A	C	C	G	A	T	C	T	C	T	T	G	T	A	G	A	T	C	G	T	T	C	T
342	Delta	>143550|1|265	G	G	T	T	T	A	T	A	C	C	T	T	C	C	C	A	G	G	T	A	A	C	A	A	A	C	C	G	A	T	C	T	C	T	T	G	T	A	G	A	T	C	G	T	T	C	T
343	Delta	>143549|1|265	G	G	T	T	T	A	T	A	C	C	T	T	C	C	C	A	G	G	T	A	A	C	A	A	A	C	C	G	A	T	C	T	C	T	T	G	T	A	G	A	T	C	G	T	T	C	T
344	Delta	>143548|1|265	G	G	T	T	T	A	T	A	C	C	T	T	C	C	C	A	G	G	T	A	A	C	A	A	A	C	C	G	A	T	C	T	C	T	T	G	T	A	G	A	T	C	G	T	T	C	T
345	Delta	>143547|1|265	G	G	T	T	T	A	T	A	C	C	T	T	C	C	C	A	G	G	T	A	A	C	A	A	A	C	C	G	A	T	C	T	C	T	T	G	T	A	G	A	T	C	G	T	T	C	T
346	Delta	>143545|1|265	G	G	T	T	T	A	T	A	C	C	T	T	C	C	C	A	G	G	T	A	A	C	A	A	A	C	C	G	A	T	C	T	C	T	T	G	T	A	G	A	T	C	G	T	T	C	T
347	Delta	>143544|1|265	G	G	T	T	T	A	T	A	C	C	T	T	C	C	C	A	G	G	T	A	A	C	A	A	A	C	C	G	A	T	C	T	C	T	T	G	T	A	G	A	T	C	G	T	T	C	T
348	Delta	>143543|1|265	G	G	T	T	T	A	T	A	C	C	T	T	C	C	C	A	G	G	T	A	A	C	A	A	A	C	C	G	A	T	C	T	C	T	T	G	T	A	G	A	T	C	G	T	T	C	T
349	Delta	>143542|1|265	G	G	T	T	T	A	T	A	C	C	T	T	C	C	C	A	G	G	T	A	A	C	A	A	A	C	C	G	A	T	C	T	C	T	T	G	T	A	G	A	T	C	G	T	T	C	T
350	Delta	>143541|1|265	G	G	T	T	T	A	T	A	C	C	T	T	C	C	C	A	G	G	T	A	A	C	A	A	A	C	C	G	A	T	C	T	C	T	T	G	T	A	G	A	T	C	G	T	T	C	T
351	Delta	>143540|1|265	G	G	T	T	T	A	T	A	C	C	T	T	C	C	C	A	G	G	T	A	A	C	A	A	A	C	C	G	A	T	C	T	C	T	T	G	T	A	G	A	T	C	G	T	T	C	T
352	Delta	>143539|1|265	G	G	T	T	T	A	T	A	C	C	T	T	C	C	C	A	G	G	T	A	A	C	A	A	A	C	C	G	A	T	C	T	C	T	T	G	T	A	G	A	T	C	G	T	T	C	T
353	Delta	>143538|1|265	G	G	T	T	T	A	T	A	C	C	T	T	C	C	C	A	G	G	T	A	A	C	A	A	A	C	C	G	A	T	C	T	C	T	T	G	T	A	G	A	T	C	G	T	T	C	T
354	Delta	>143537|1|265	G	G	T	T	T	A	T	A	C	C	T	T	C	C	C	A	G	G	T	A	A	C	A	A	A	C	C	G	A	T	C	T	C	T	T	G	T	A	G	A	T	C	G	T	T	C	T
355	Delta	>143536|1|265	G	G	T	T	T	A	T	A	C	C	T	T	C	C	C	A	G	G	T	A	A	C	A	A	A	C	C	G	A	T	C	T	C	T	T	G	T	A	G	A	T	C	G	T	T	C	T
356	Delta	>143535|1|265	G	G	T	T	T	A	T	A	C	C	T	T	C	C	C	A	G	G	T	A	A	C	A	A	A	C	C	G	A	T	C	T	C	T	T	G	T	A	G	A	T	C	G	T	T	C	T
357	Delta	>143534|1|265	G	G	T	T	T	A	T	A	C	C	T	T	C	C	C	A	G	G	T	A	A	C	A	A	A	C	C	G	A	T	C	T	C	T	T	G	T	A	G	A	T	C	G	T	T	C	T
358	Delta	>143533|1|265	G	G	T	T	T	A	T	A	C	C	T	T	C	C	C	A	G	G	T	A	A	C	A	A	A	C	C	G	A	T	C	T	C	T	T	G	T	A	G	A	T	C	G	T	T	C	T
359	Delta	>143532|1|265	G	G	T	T	T	A	T	A	C	C	T	T	C	C	C	A	G	G	T	A	A	C	A	A	A	C	C	G	A	T	C	T	C	T	T	G	T	A	G	A	T	C	G	T	T	C	T
360	Delta	>143531|1|265	G	G	T	T	T	A	T	A	C	C	T	T	C	C	C	A	G	G	T	A	A	C	A	A	A	C	C	G	A	T	C	T	C	T	T	G	T	A	G	A	T	C	G	T	T	C	T
361	Delta	>143530|1|265	G	G	T	T	T	A	T	A	C	C	T	T	C	C	C	A	G	G	T	A	A	C	A	A	A	C	C	G	A	T	C	T	C	T	T	G	T	A	G	A	T	C	G	T	T	C	T
362	Delta	>143529|1|265	G	G	T	T	T	A	T	A	C	C	T	T	C	C	C	A	G	G	T	A	A	C	A	A	A	C	C	G	A	T	C	T	C	T	T	G	T	A	G	A	T	C	G	T	T	C	T
363	Delta	>143528|1|265	G	G	T	T	T	A	T	A	C	C	T	T	C	C	C	A	G	G	T	A	A	C	A	A	A	C	C	G	A	T	C	T	C	T	T	G	T	A	G	A	T	C	G	T	T	C	T
364	Delta	>143527|1|265	G	G	T	T	T	A	T	A	C	C	T	T	C	C	C	A	G	G	T	A	A	C	A	A	A	C	C	G	A	T	C	T	C	T	T	G	T	A	G	A	T	C	G	T	T	C	T
365	Delta	>143526|1|265	G	G	T	T	T	A	T	A	C	C	T	T	C	C	C	A	G	G	T	A	A	C	A	A	A	C	C	G	A	T	C	T	C	T	T	G	T	A	G	A	T	C	G	T	T	C	T
366	Delta	>143525|1|265	G	G	T	T	T	A	T	A	C	C	T	T	C	C	C	A	G	G	T	A	A	C	A	A	A	C	C	G	A	T	C	T	C	T	T	G	T	A	G	A	T	C	G	T	T	C	T
367	Delta	>143524|1|265	G	G	T	T	T	A	T	A	C	C	T	T	C	C	C	A	G	G	T	A	A	C	A	A	A	C	C	G	A	T	C	T	C	T	T	G	T	A	G	A	T	C	G	T	T	C	T
368	Delta	>143523|1|265	G	G	T	T	T	A	T	A	C	C	T	T	C	C	C	A	G	G	T	A	A	C	A	A	A	C	C	G	A	T	C	T	C	T	T	G	T	A	G	A	T	C	G	T	T	C	T
369	Delta	>143522|1|265	G	G	T	T	T	A	T	A	C	C	T	T	C	C	C	A	G	G	T	A	A	C	A	A	A	C	C	G	A	T	C	T	C	T	T	G	T	A	G	A	T	C	G	T	T	C	T
370	Delta	>143520|1|265	G	G	T	T	T	A	T	A	C	C	T	T	C	C	C	A	G	G	T	A	A	C	A	A	A	C	C	G	A	T	C	T	C	T	T	G	T	A	G	A	T	C	G	T	T	C	T
371	Delta	>143519|1|265	G	G	T	T	T	A	T	A	C	C	T	T	C	C	C	A	G	G	T	A	A	C	A	A	A	C	C	G	A	T	C	T	C	T	T	G	T	A	G	A	T	C	G	T	T	C	T
372	Delta	>143518|1|265	G	G	T	T	T	A	T	A	C	C	T	T	C	C	C	A	G	G	T	A	A	C	A	A	A	C	C	G	A	T	C	T	C	T	T	G	T	A	G	A	T	C	G	T	T	C	T
373	Delta	>143517|1|265	G	G	T	T	T	A	T	A	C	C	T	T	C	C	C	A	G	G	T	A	A	C	A	A	A	C	C	G	A	T	C	T	C	T	T	G	T	A	G	A	T	C	G	T	T	C	T
374	Delta	>143516|1|265	G	G	T	T	T	A	T	A	C	C	T	T	C	C	C	A	G	G	T	A	A	C	A	A	A	C	C	G	A	T	C	T	C	T	T	G	T	A	G	A	T	C	G	T	T	C	T
375	Delta	>143515|1|265	G	G	T	T	T	A	T	A	C	C	T	T	C	C	C	A	G	G	T	A	A	C	A	A	A	C	C	G	A	T	C	T	C	T	T	G	T	A	G	A	T	C	G	T	T	C	T
376	Delta	>143514|1|265	G	G	T	T	T	A	T	A	C	C	T	T	C	C	C	A	G	G	T	A	A	C	A	A	A	C	C	G	A	T	C	T	C	T	T	G	T	A	G	A	T	C	G	T	T	C	T
377	Delta	>143513|1|265	G	G	T	T	T	A	T	A	C	C	T	T	C	C	C	A	G	G	T	A	A	C	A	A	A	C	C	G	A	T	C	T	C	T	T	G	T	A	G	A	T	C	G	T	T	C	T
378	Delta	>143512|1|265	G	G	T	T	T	A	T	A	C	C	T	T	C	C	C	A	G	G	T	A	A	C	A	A	A	C	C	G	A	T	C	T	C	T	T	G	T	A	G	A	T	C	G	T	T	C	T
379	Delta	>143511|1|265	G	G	T	T	T	A	T	A	C	C	T	T	C	C	C	A	G	G	T	A	A	C	A	A	A	C	C	G	A	T	C	T	C	T	T	G	T	A	G	A	T	C	G	T	T	C	T
380	Delta	>143509|1|265	G	G	T	T	T	A	T	A	C	C	T	T	C	C	C	A	G	G	T	A	A	C	A	A	A	C	C	G	A	T	C	T	C	T	T	G	T	A	G	A	T	C	G	T	T	C	T
381	Delta	>143508|1|265	G	G	T	T	T	A	T	A	C	C	T	T	C	C	C	A	G	G	T	A	A	C	A	A	A	C	C	G	A	T	C	T	C	T	T	G	T	A	G	A	T	C	G	T	T	C	T
382	Delta	>143507|1|265	G	G	T	T	T	A	T	A	C	C	T	T	C	C	C	A	G	G	T	A	A	C	A	A	A	C	C	G	A	T	C	T	C	T	T	G	T	A	G	A	T	C	G	T	T	C	T
383	Delta	>143506|1|265	G	G	T	T	T	A	T	A	C	C	T	T	C	C	C	A	G	G	T	A	A	C	A	A	A	C	C	G	A	T	C	T	C	T	T	G	T	A	G	A	T	C	G	T	T	C	T
384	Delta	>143505|1|265	G	G	T	T	T	A	T	A	C	C	T	T	C	C	C	A	G	G	T	A	A	C	A	A	A	C	C	G	A	T	C	T	C	T	T	G	T	A	G	A	T	C	G	T	T	C	T
385	Delta	>143504|1|265	G	G	T	T	T	A	T	A	C	C	T	T	C	C	C	A	G	G	T	A	A	C	A	A	A	C	C	G	A	T	C	T	C	T	T	G	T	A	G	A	T	C	G	T	T	C	T
386	Delta	>143503|1|265	G	G	T	T	T	A	T	A	C	C	T	T	C	C	C	A	G	G	T	A	A	C	A	A	A	C	C	G	A	T	C	T	C	T	T	G	T	A	G	A	T	C	G	T	T	C	T
387	Delta	>143502|1|265	G	G	T	T	T	A	T	A	C	C	T	T	C	C	C	A	G	G	T	A	A	C	A	A	A	C	C	G	A	T	C	T	C	T	T	G	T	A	G	A	T	C	G	T	T	C	T
388	Delta	>143501|1|265	G	G	T	T	T	A	T	A	C	C	T	T	C	C	C	A	G	G	T	A	A	C	A	A	A	C	C	G	A	T	C	T	C	T	T	G	T	A	G	A	T	C	G	T	T	C	T
389	Delta	>143500|1|265	G	G	T	T	T	A	T	A	C	C	T	T	C	C	C	A	G	G	T	A	A	C	A	A	A	C	C	G	A	T	C	T	C	T	T	G	T	A	G	A	T	C	G	T	T	C	T
390	Delta	>143499|1|265	G	G	T	T	T	A	T	A	C	C	T	T	C	C	C	A	G	G	T	A	A	C	A	A	A	C	C	G	A	T	C	T	C	T	T	G	T	A	G	A	T	C	G	T	T	C	T
391	Delta	>143498|1|265	G	G	T	T	T	A	T	A	C	C	T	T	C	C	C	A	G	G	T	A	A	C	A	A	A	C	C	G	A	T	C	T	C	T	T	G	T	A	G	A	T	C	G	T	T	C	T
392	Delta	>143497|1|265	G	G	T	T	T	A	T	A	C	C	T	T	C	C	C	A	G	G	T	A	A	C	A	A	A	C	C	G	A	T	C	T	C	T	T	G	T	A	G	A	T	C	G	T	T	C	T
393	Delta	>143496|1|265	G	G	T	T	T	A	T	A	C	C	T	T	C	C	C	A	G	G	T	A	A	C	A	A	A	C	C	G	A	T	C	T	C	T	T	G	T	A	G	A	T	C	G	T	T	C	T
394	Delta	>143495|1|265	G	G	T	T	T	A	T	A	C	C	T	T	C	C	C	A	G	G	T	A	A	C	A	A	A	C	C	G	A	T	C	T	C	T	T	G	T	A	G	A	T	C	G	T	T	C	T
395	Delta	>143494|1|265	G	G	T	T	T	A	T	A	C	C	T	T	C	C	C	A	G	G	T	A	A	C	A	A	A	C	C	G	A	T	C	T	C	T	T	G	T	A	G	A	T	C	G	T	T	C	T
396	Delta	>143493|1|265	G	G	T	T	T	A	T	A	C	C	T	T	C	C	C	A	G	G	T	A	A	C	A	A	A	C	C	G	A	T	C	T	C	T	T	G	T	A	G	A	T	C	G	T	T	C	T
397	Delta	>143492|1|265	G	G	T	T	T	A	T	A	C	C	T	T	C	C	C	A	G	G	T	A	A	C	A	A	A	C	C	G	A	T	C	T	C	T	T	G	T	A	G	A	T	C	G	T	T	C	T
398	Delta	>143491|1|265	G	G	T	T	T	A	T	A	C	C	T	T	C	C	C	A	G	G	T	A	A	C	A	A	A	C	C	G	A	T	C	T	C	T	T	G	T	A	G	A	T	C	G	T	T	C	T
399	Delta	>143490|1|265	G	G	T	T	T	A	T	A	C	C	T	T	C	C	C	A	G	G	T	A	A	C	A	A	A	C	C	G	A	T	C	T	C	T	T	G	T	A	G	A	T	C	G	T	T	C	T
400	Delta	>143489|1|265	G	G	T	T	T	A	T	A	C	C	T	T	C	C	C	A	G	G	T	A	A	C	A	A	A	C	C	G	A	T	C	T	C	T	T	G	T	A	G	A	T	C	G	T	T	C	T
401	Delta	>143488|1|265	G	G	T	T	T	A	T	A	C	C	T	T	C	C	C	A	G	G	T	A	A	C	A	A	A	C	C	G	A	T	C	T	C	T	T	G	T	A	G	A	T	C	G	T	T	C	T
402	Delta	>143487|1|265	G	G	T	T	T	A	T	A	C	C	T	T	C	C	C	A	G	G	T	A	A	C	A	A	A	C	C	G	A	T	C	T	C	T	T	G	T	A	G	A	T	C	G	T	T	C	T
403	Delta	>143486|1|265	G	G	T	T	T	A	T	A	C	C	T	T	C	C	C	A	G	G	T	A	A	C	A	A	A	C	C	G	A	T	C	T	C	T	T	G	T	A	G	A	T	C	G	T	T	C	T
404	Delta	>143485|1|265	G	G	T	T	T	A	T	A	C	C	T	T	C	C	C	A	G	G	T	A	A	C	A	A	A	C	C	G	A	T	C	T	C	T	T	G	T	A	G	A	T	C	G	T	T	C	T
405	Delta	>143484|1|265	G	G	T	T	T	A	T	A	C	C	T	T	C	C	C	A	G	G	T	A	A	C	A	A	A	C	C	G	A	T	C	T	C	T	T	G	T	A	G	A	T	C	G	T	T	C	T
406	Delta	>143483|1|265	G	G	T	T	T	A	T	A	C	C	T	T	C	C	C	A	G	G	T	A	A	C	A	A	A	C	C	G	A	T	C	T	C	T	T	G	T	A	G	A	T	C	G	T	T	C	T
407	Delta	>143482|1|265	G	G	T	T	T	A	T	A	C	C	T	T	C	C	C	A	G	G	T	A	A	C	A	A	A	C	C	G	A	T	C	T	C	T	T	G	T	A	G	A	T	C	G	T	T	C	T
408	Delta	>143481|1|265	G	G	T	T	T	A	T	A	C	C	T	T	C	C	C	A	G	G	T	A	A	C	A	A	A	C	C	G	A	T	C	T	C	T	T	G	T	A	G	A	T	C	G	T	T	C	T
409	Delta	>143480|1|265	G	G	T	T	T	A	T	A	C	C	T	T	C	C	C	A	G	G	T	A	A	C	A	A	A	C	C	G	A	T	C	T	C	T	T	G	T	A	G	A	T	C	G	T	T	C	T
410	Delta	>143479|1|265	G	G	T	T	T	A	T	A	C	C	T	T	C	C	C	A	G	G	T	A	A	C	A	A	A	C	C	G	A	T	C	T	C	T	T	G	T	A	G	A	T	C	G	T	T	C	T
411	Delta	>143478|1|265	G	G	T	T	T	A	T	A	C	C	T	T	C	C	C	A	G	G	T	A	A	C	A	A	A	C	C	G	A	T	C	T	C	T	T	G	T	A	G	A	T	C	G	T	T	C	T
412	Delta	>143477|1|265	G	G	T	T	T	A	T	A	C	C	T	T	C	C	C	A	G	G	T	A	A	C	A	A	A	C	C	G	A	T	C	T	C	T	T	G	T	A	G	A	T	C	G	T	T	C	T
413	Delta	>143476|1|265	G	G	T	T	T	A	T	A	C	C	T	T	C	C	C	A	G	G	T	A	A	C	A	A	A	C	C	G	A	T	C	T	C	T	T	G	T	A	G	A	T	C	G	T	T	C	T
414	Delta	>143475|1|265	G	G	T	T	T	A	T	A	C	C	T	T	C	C	C	A	G	G	T	A	A	C	A	A	A	C	C	G	A	T	C	T	C	T	T	G	T	A	G	A	T	C	G	T	T	C	T
415	Delta	>143474|1|265	G	G	T	T	T	A	T	A	C	C	T	T	C	C	C	A	G	G	T	A	A	C	A	A	A	C	C	G	A	T	C	T	C	T	T	G	T	A	G	A	T	C	G	T	T	C	T
416	Delta	>143473|1|265	G	G	T	T	T	A	T	A	C	C	T	T	C	C	C	A	G	G	T	A	A	C	A	A	A	C	C	G	A	T	C	T	C	T	T	G	T	A	G	A	T	C	G	T	T	C	T
417	Delta	>143472|1|265	G	G	T	T	T	A	T	A	C	C	T	T	C	C	C	A	G	G	T	A	A	C	A	A	A	C	C	G	A	T	C	T	C	T	T	G	T	A	G	A	T	C	G	T	T	C	T
418	Delta	>143471|1|265	G	G	T	T	T	A	T	A	C	C	T	T	C	C	C	A	G	G	T	A	A	C	A	A	A	C	C	G	A	T	C	T	C	T	T	G	T	A	G	A	T	C	G	T	T	C	T
419	Delta	>143470|1|265	G	G	T	T	T	A	T	A	C	C	T	T	C	C	C	A	G	G	T	A	A	C	A	A	A	C	C	G	A	T	C	T	C	T	T	G	T	A	G	A	T	C	G	T	T	C	T
420	Delta	>143469|1|265	G	G	T	T	T	A	T	A	C	C	T	T	C	C	C	A	G	G	T	A	A	C	A	A	A	C	C	G	A	T	C	T	C	T	T	G	T	A	G	A	T	C	G	T	T	C	T
421	Delta	>143467|1|265	G	G	T	T	T	A	T	A	C	C	T	T	C	C	C	A	G	G	T	A	A	C	A	A	A	C	C	G	A	T	C	T	C	T	T	G	T	A	G	A	T	C	G	T	T	C	T
422	Delta	>143466|1|265	G	G	T	T	T	A	T	A	C	C	T	T	C	C	C	A	G	G	T	A	A	C	A	A	A	C	C	G	A	T	C	T	C	T	T	G	T	A	G	A	T	C	G	T	T	C	T
423	Delta	>143465|1|265	G	G	T	T	T	A	T	A	C	C	T	T	C	C	C	A	G	G	T	A	A	C	A	A	A	C	C	G	A	T	C	T	C	T	T	G	T	A	G	A	T	C	G	T	T	C	T
424	Delta	>143464|1|265	G	G	T	T	T	A	T	A	C	C	T	T	C	C	C	A	G	G	T	A	A	C	A	A	A	C	C	G	A	T	C	T	C	T	T	G	T	A	G	A	T	C	G	T	T	C	T
425	Delta	>143462|1|265	G	G	T	T	T	A	T	A	C	C	T	T	C	C	C	A	G	G	T	A	A	C	A	A	A	C	C	G	A	T	C	T	C	T	T	G	T	A	G	A	T	C	G	T	T	C	T
426	Delta	>143460|1|265	G	G	T	T	T	A	T	A	C	C	T	T	C	C	C	A	G	G	T	A	A	C	A	A	A	C	C	G	A	T	C	T	C	T	T	G	T	A	G	A	T	C	G	T	T	C	T
427	Delta	>143459|1|265	G	G	T	T	T	A	T	A	C	C	T	T	C	C	C	A	G	G	T	A	A	C	A	A	A	C	C	G	A	T	C	T	C	T	T	G	T	A	G	A	T	C	G	T	T	C	T
428	Delta	>143458|1|265	G	G	T	T	T	A	T	A	C	C	T	T	C	C	C	A	G	G	T	A	A	C	A	A	A	C	C	G	A	T	C	T	C	T	T	G	T	A	G	A	T	C	G	T	T	C	T
429	Delta	>143457|1|265	G	G	T	T	T	A	T	A	C	C	T	T	C	C	C	A	G	G	T	A	A	C	A	A	A	C	C	G	A	T	C	T	C	T	T	G	T	A	G	A	T	C	G	T	T	C	T
430	Delta	>143456|1|265	G	G	T	T	T	A	T	A	C	C	T	T	C	C	C	A	G	G	T	A	A	C	A	A	A	C	C	G	A	T	C	T	C	T	T	G	T	A	G	A	T	C	G	T	T	C	T
431	Delta	>143455|1|265	G	G	T	T	T	A	T	A	C	C	T	T	C	C	C	A	G	G	T	A	A	C	A	A	A	C	C	G	A	T	C	T	C	T	T	G	T	A	G	A	T	C	G	T	T	C	T
432	Delta	>143454|1|265	G	G	T	T	T	A	T	A	C	C	T	T	C	C	C	A	G	G	T	A	A	C	A	A	A	C	C	G	A	T	C	T	C	T	T	G	T	A	G	A	T	C	G	T	T	C	T
433	Delta	>143453|1|265	G	G	T	T	T	A	T	A	C	C	T	T	C	C	C	A	G	G	T	A	A	C	A	A	A	C	C	G	A	T	C	T	C	T	T	G	T	A	G	A	T	C	G	T	T	C	T
434	Delta	>143452|1|265	G	G	T	T	T	A	T	A	C	C	T	T	C	C	C	A	G	G	T	A	A	C	A	A	A	C	C	G	A	T	C	T	C	T	T	G	T	A	G	A	T	C	G	T	T	C	T
435	Delta	>143451|1|265	G	G	T	T	T	A	T	A	C	C	T	T	C	C	C	A	G	G	T	A	A	C	A	A	A	C	C	G	A	T	C	T	C	T	T	G	T	A	G	A	T	C	G	T	T	C	T
436	Delta	>143450|1|265	G	G	T	T	T	A	T	A	C	C	T	T	C	C	C	A	G	G	T	A	A	C	A	A	A	C	C	G	A	T	C	T	C	T	T	G	T	A	G	A	T	C	G	T	T	C	T
437	Delta	>143449|1|265	G	G	T	T	T	A	T	A	C	C	T	T	C	C	C	A	G	G	T	A	A	C	A	A	A	C	C	G	A	T	C	T	C	T	T	G	T	A	G	A	T	C	G	T	T	C	T
438	Delta	>143448|1|265	G	G	T	T	T	A	T	A	C	C	T	T	C	C	C	A	G	G	T	A	A	C	A	A	A	C	C	G	A	T	C	T	C	T	T	G	T	A	G	A	T	C	G	T	T	C	T
439	Delta	>143447|1|265	G	G	T	T	T	A	T	A	C	C	T	T	C	C	C	A	G	G	T	A	A	C	A	A	A	C	C	G	A	T	C	T	C	T	T	G	T	A	G	A	T	C	G	T	T	C	T
440	Delta	>143446|1|265	G	G	T	T	T	A	T	A	C	C	T	T	C	C	C	A	G	G	T	A	A	C	A	A	A	C	C	G	A	T	C	T	C	T	T	G	T	A	G	A	T	C	G	T	T	C	T
441	Delta	>143445|1|265	G	G	T	T	T	A	T	A	C	C	T	T	C	C	C	A	G	G	T	A	A	C	A	A	A	C	C	G	A	T	C	T	C	T	T	G	T	A	G	A	T	C	G	T	T	C	T
442	Delta	>143444|1|265	G	G	T	T	T	A	T	A	C	C	T	T	C	C	C	A	G	G	T	A	A	C	A	A	A	C	C	G	A	T	C	T	C	T	T	G	T	A	G	A	T	C	G	T	T	C	T
443	Delta	>143443|1|265	G	G	T	T	T	A	T	A	C	C	T	T	C	C	C	A	G	G	T	A	A	C	A	A	A	C	C	G	A	T	C	T	C	T	T	G	T	A	G	A	T	C	G	T	T	C	T
444	Delta	>143442|1|265	G	G	T	T	T	A	T	A	C	C	T	T	C	C	C	A	G	G	T	A	A	C	A	A	A	C	C	G	A	T	C	T	C	T	T	G	T	A	G	A	T	C	G	T	T	C	T
445	Delta	>143441|1|265	G	G	T	T	T	A	T	A	C	C	T	T	C	C	C	A	G	G	T	A	A	C	A	A	A	C	C	G	A	T	C	T	C	T	T	G	T	A	G	A	T	C	G	T	T	C	T
446	Delta	>143440|1|265	G	G	T	T	T	A	T	A	C	C	T	T	C	C	C	A	G	G	T	A	A	C	A	A	A	C	C	G	A	T	C	T	C	T	T	G	T	A	G	A	T	C	G	T	T	C	T
447	Delta	>143438|1|265	G	G	T	T	T	A	T	A	C	C	T	T	C	C	C	A	G	G	T	A	A	C	A	A	A	C	C	G	A	T	C	T	C	T	T	G	T	A	G	A	T	C	G	T	T	C	T
448	Delta	>143437|1|265	G	G	T	T	T	A	T	A	C	C	T	T	C	C	C	A	G	G	T	A	A	C	A	A	A	C	C	G	A	T	C	T	C	T	T	G	T	A	G	A	T	C	G	T	T	C	T
449	Delta	>143436|1|265	G	G	T	T	T	A	T	A	C	C	T	T	C	C	C	A	G	G	T	A	A	C	A	A	A	C	C	G	A	T	C	T	C	T	T	G	T	A	G	A	T	C	G	T	T	C	T
450	Delta	>143435|1|265	G	G	T	T	T	A	T	A	C	C	T	T	C	C	C	A	G	G	T	A	A	C	A	A	A	C	C	G	A	T	C	T	C	T	T	G	T	A	G	A	T	C	G	T	T	C	T
451	Delta	>143434|1|265	G	G	T	T	T	A	T	A	C	C	T	T	C	C	C	A	G	G	T	A	A	C	A	A	A	C	C	G	A	T	C	T	C	T	T	G	T	A	G	A	T	C	G	T	T	C	T
452	Delta	>143433|1|265	G	G	T	T	T	A	T	A	C	C	T	T	C	C	C	A	G	G	T	A	A	C	A	A	A	C	C	G	A	T	C	T	C	T	T	G	T	A	G	A	T	C	G	T	T	C	T
453	Delta	>143431|1|265	G	G	T	T	T	A	T	A	C	C	T	T	C	C	C	A	G	G	T	A	A	C	A	A	A	C	C	G	A	T	C	T	C	T	T	G	T	A	G	A	T	C	G	T	T	C	T
454	Delta	>143430|1|265	G	G	T	T	T	A	T	A	C	C	T	T	C	C	C	A	G	G	T	A	A	C	A	A	A	C	C	G	A	T	C	T	C	T	T	G	T	A	G	A	T	C	G	T	T	C	T
455	Delta	>143429|1|265	G	G	T	T	T	A	T	A	C	C	T	T	C	C	C	A	G	G	T	A	A	C	A	A	A	C	C	G	A	T	C	T	C	T	T	G	T	A	G	A	T	C	G	T	T	C	T
456	Delta	>143428|1|265	G	G	T	T	T	A	T	A	C	C	T	T	C	C	C	A	G	G	T	A	A	C	A	A	A	C	C	G	A	T	C	T	C	T	T	G	T	A	G	A	T	C	G	T	T	C	T
457	Delta	>143427|1|265	G	G	T	T	T	A	T	A	C	C	T	T	C	C	C	A	G	G	T	A	A	C	A	A	A	C	C	G	A	T	C	T	C	T	T	G	T	A	G	A	T	C	G	T	T	C	T
458	Delta	>143426|1|265	G	G	T	T	T	A	T	A	C	C	T	T	C	C	C	A	G	G	T	A	A	C	A	A	A	C	C	G	A	T	C	T	C	T	T	G	T	A	G	A	T	C	G	T	T	C	T
459	Delta	>143425|1|265	G	G	T	T	T	A	T	A	C	C	T	T	C	C	C	A	G	G	T	A	A	C	A	A	A	C	C	G	A	T	C	T	C	T	T	G	T	A	G	A	T	C	G	T	T	C	T
460	Delta	>143424|1|265	G	G	T	T	T	A	T	A	C	C	T	T	C	C	C	A	G	G	T	A	A	C	A	A	A	C	C	G	A	T	C	T	C	T	T	G	T	A	G	A	T	C	G	T	T	C	T
461	Delta	>143423|1|265	G	G	T	T	T	A	T	A	C	C	T	T	C	C	C	A	G	G	T	A	A	C	A	A	A	C	C	G	A	T	C	T	C	T	T	G	T	A	G	A	T	C	G	T	T	C	T
462	Delta	>143422|1|265	G	G	T	T	T	A	T	A	C	C	T	T	C	C	C	A	G	G	T	A	A	C	A	A	A	C	C	G	A	T	C	T	C	T	T	G	T	A	G	A	T	C	G	T	T	C	T
463	Delta	>143421|1|265	G	G	T	T	T	A	T	A	C	C	T	T	C	C	C	A	G	G	T	A	A	C	A	A	A	C	C	G	A	T	C	T	C	T	T	G	T	A	G	A	T	C	G	T	T	C	T
464	Delta	>143420|1|265	G	G	T	T	T	A	T	A	C	C	T	T	C	C	C	A	G	G	T	A	A	C	A	A	A	C	C	G	A	T	C	T	C	T	T	G	T	A	G	A	T	C	G	T	T	C	T
465	Delta	>143419|1|265	G	G	T	T	T	A	T	A	C	C	T	T	C	C	C	A	G	G	T	A	A	C	A	A	A	C	C	G	A	T	C	T	C	T	T	G	T	A	G	A	T	C	G	T	T	C	T
466	Delta	>143418|1|265	G	G	T	T	T	A	T	A	C	C	T	T	C	C	C	A	G	G	T	A	A	C	A	A	A	C	C	G	A	T	C	T	C	T	T	G	T	A	G	A	T	C	G	T	T	C	T
467	Delta	>143417|1|265	G	G	T	T	T	A	T	A	C	C	T	T	C	C	C	A	G	G	T	A	A	C	A	A	A	C	C	G	A	T	C	T	C	T	T	G	T	A	G	A	T	C	G	T	T	C	T
468	Delta	>143416|1|265	G	G	T	T	T	A	T	A	C	C	T	T	C	C	C	A	G	G	T	A	A	C	A	A	A	C	C	G	A	T	C	T	C	T	T	G	T	A	G	A	T	C	G	T	T	C	T
469	Delta	>143415|1|265	G	G	T	T	T	A	T	A	C	C	T	T	C	C	C	A	G	G	T	A	A	C	A	A	A	C	C	G	A	T	C	T	C	T	T	G	T	A	G	A	T	C	G	T	T	C	T
470	Delta	>143414|1|265	G	G	T	T	T	A	T	A	C	C	T	T	C	C	C	A	G	G	T	A	A	C	A	A	A	C	C	G	A	T	C	T	C	T	T	G	T	A	G	A	T	C	G	T	T	C	T
471	Delta	>143413|1|265	G	G	T	T	T	A	T	A	C	C	T	T	C	C	C	A	G	G	T	A	A	C	A	A	A	C	C	G	A	T	C	T	C	T	T	G	T	A	G	A	T	C	G	T	T	C	T
472	Delta	>143412|1|265	G	G	T	T	T	A	T	A	C	C	T	T	C	C	C	A	G	G	T	A	A	C	A	A	A	C	C	G	A	T	C	T	C	T	T	G	T	A	G	A	T	C	G	T	T	C	T
473	Delta	>143411|1|265	G	G	T	T	T	A	T	A	C	C	T	T	C	C	C	A	G	G	T	A	A	C	A	A	A	C	C	G	A	T	C	T	C	T	T	G	T	A	G	A	T	C	G	T	T	C	T
474	Delta	>143410|1|265	G	G	T	T	T	A	T	A	C	C	T	T	C	C	C	A	G	G	T	A	A	C	A	A	A	C	C	G	A	T	C	T	C	T	T	G	T	A	G	A	T	C	G	T	T	C	T
475	Delta	>143409|1|265	G	G	T	T	T	A	T	A	C	C	T	T	C	C	C	A	G	G	T	A	A	C	A	A	A	C	C	G	A	T	C	T	C	T	T	G	T	A	G	A	T	C	G	T	T	C	T
476	Delta	>143408|1|265	G	G	T	T	T	A	T	A	C	C	T	T	C	C	C	A	G	G	T	A	A	C	A	A	A	C	C	G	A	T	C	T	C	T	T	G	T	A	G	A	T	C	G	T	T	C	T
477	Delta	>143407|1|265	G	G	T	T	T	A	T	A	C	C	T	T	C	C	C	A	G	G	T	A	A	C	A	A	A	C	C	G	A	T	C	T	C	T	T	G	T	A	G	A	T	C	G	T	T	C	T
478	Delta	>143406|1|265	G	G	T	T	T	A	T	A	C	C	T	T	C	C	C	A	G	G	T	A	A	C	A	A	A	C	C	G	A	T	C	T	C	T	T	G	T	A	G	A	T	C	G	T	T	C	T
479	Delta	>143405|1|265	G	G	T	T	T	A	T	A	C	C	T	T	C	C	C	A	G	G	T	A	A	C	A	A	A	C	C	G	A	T	C	T	C	T	T	G	T	A	G	A	T	C	G	T	T	C	T
480	Delta	>143404|1|265	G	G	T	T	T	A	T	A	C	C	T	T	C	C	C	A	G	G	T	A	A	C	A	A	A	C	C	G	A	T	C	T	C	T	T	G	T	A	G	A	T	C	G	T	T	C	T
481	Delta	>143402|1|265	G	G	T	T	T	A	T	A	C	C	T	T	C	C	C	A	G	G	T	A	A	C	A	A	A	C	C	G	A	T	C	T	C	T	T	G	T	A	G	A	T	C	G	T	T	C	T
482	Delta	>143399|1|265	G	G	T	T	T	A	T	A	C	C	T	T	C	C	C	A	G	G	T	A	A	C	A	A	A	C	C	G	A	T	C	T	C	T	T	G	T	A	G	A	T	C	G	T	T	C	T
483	Delta	>143398|1|265	G	G	T	T	T	A	T	A	C	C	T	T	C	C	C	A	G	G	T	A	A	C	A	A	A	C	C	G	A	T	C	T	C	T	T	G	T	A	G	A	T	C	G	T	T	C	T
484	Delta	>143396|1|265	G	G	T	T	T	A	T	A	C	C	T	T	C	C	C	A	G	G	T	A	A	C	A	A	A	C	C	G	A	T	C	T	C	T	T	G	T	A	G	A	T	C	G	T	T	C	T
485	Delta	>143395|1|265	G	G	T	T	T	A	T	A	C	C	T	T	C	C	C	A	G	G	T	A	A	C	A	A	A	C	C	G	A	T	C	T	C	T	T	G	T	A	G	A	T	C	G	T	T	C	T
486	Delta	>143394|1|265	G	G	T	T	T	A	T	A	C	C	T	T	C	C	C	A	G	G	T	A	A	C	A	A	A	C	C	G	A	T	C	T	C	T	T	G	T	A	G	A	T	C	G	T	T	C	T
487	Delta	>143393|1|265	G	G	T	T	T	A	T	A	C	C	T	T	C	C	C	A	G	G	T	A	A	C	A	A	A	C	C	G	A	T	C	T	C	T	T	G	T	A	G	A	T	C	G	T	T	C	T
488	Delta	>143392|1|265	G	G	T	T	T	A	T	A	C	C	T	T	C	C	C	A	G	G	T	A	A	C	A	A	A	C	C	G	A	T	C	T	C	T	T	G	T	A	G	A	T	C	G	T	T	C	T
489	Delta	>143391|1|265	G	G	T	T	T	A	T	A	C	C	T	T	C	C	C	A	G	G	T	A	A	C	A	A	A	C	C	G	A	T	C	T	C	T	T	G	T	A	G	A	T	C	G	T	T	C	T
490	Delta	>143390|1|265	G	G	T	T	T	A	T	A	C	C	T	T	C	C	C	A	G	G	T	A	A	C	A	A	A	C	C	G	A	T	C	T	C	T	T	G	T	A	G	A	T	C	G	T	T	C	T
491	Delta	>143389|1|265	G	G	T	T	T	A	T	A	C	C	T	T	C	C	C	A	G	G	T	A	A	C	A	A	A	C	C	G	A	T	C	T	C	T	T	G	T	A	G	A	T	C	G	T	T	C	T
492	Delta	>143388|1|265	G	G	T	T	T	A	T	A	C	C	T	T	C	C	C	A	G	G	T	A	A	C	A	A	A	C	C	G	A	T	C	T	C	T	T	G	T	A	G	A	T	C	G	T	T	C	T
493	Delta	>143387|1|265	G	G	T	T	T	A	T	A	C	C	T	T	C	C	C	A	G	G	T	A	A	C	A	A	A	C	C	G	A	T	C	T	C	T	T	G	T	A	G	A	T	C	G	T	T	C	T
494	Delta	>143386|1|265	G	G	T	T	T	A	T	A	C	C	T	T	C	C	C	A	G	G	T	A	A	C	A	A	A	C	C	G	A	T	C	T	C	T	T	G	T	A	G	A	T	C	G	T	T	C	T
495	Delta	>143385|1|265	G	G	T	T	T	A	T	A	C	C	T	T	C	C	C	A	G	G	T	A	A	C	A	A	A	C	C	G	A	T	C	T	C	T	T	G	T	A	G	A	T	C	G	T	T	C	T
496	Delta	>143384|1|265	G	G	T	T	T	A	T	A	C	C	T	T	C	C	C	A	G	G	T	A	A	C	A	A	A	C	C	G	A	T	C	T	C	T	T	G	T	A	G	A	T	C	G	T	T	C	T
497	Delta	>143383|1|265	G	G	T	T	T	A	T	A	C	C	T	T	C	C	C	A	G	G	T	A	A	C	A	A	A	C	C	G	A	T	C	T	C	T	T	G	T	A	G	A	T	C	G	T	T	C	T
498	Delta	>143382|1|265	G	G	T	T	T	A	T	A	C	C	T	T	C	C	C	A	G	G	T	A	A	C	A	A	A	C	C	G	A	T	C	T	C	T	T	G	T	A	G	A	T	C	G	T	T	C	T
499	Delta	>143381|1|265	G	G	T	T	T	A	T	A	C	C	T	T	C	C	C	A	G	G	T	A	A	C	A	A	A	C	C	G	A	T	C	T	C	T	T	G	T	A	G	A	T	C	G	T	T	C	T
500	Delta	>143380|1|265	G	G	T	T	T	A	T	A	C	C	T	T	C	C	C	A	G	G	T	A	A	C	A	A	A	C	C	G	A	T	C	T	C	T	T	G	T	A	G	A	T	C	G	T	T	C	T
501	Delta	>143379|1|265	G	G	T	T	T	A	T	A	C	C	T	T	C	C	C	A	G	G	T	A	A	C	A	A	A	C	C	G	A	T	C	T	C	T	T	G	T	A	G	A	T	C	G	T	T	C	T
502	Delta	>143378|1|265	G	G	T	T	T	A	T	A	C	C	T	T	C	C	C	A	G	G	T	A	A	C	A	A	A	C	C	G	A	T	C	T	C	T	T	G	T	A	G	A	T	C	G	T	T	C	T
503	Delta	>143377|1|265	G	G	T	T	T	A	T	A	C	C	T	T	C	C	C	A	G	G	T	A	A	C	A	A	A	C	C	G	A	T	C	T	C	T	T	G	T	A	G	A	T	C	G	T	T	C	T
504	Delta	>143376|1|265	G	G	T	T	T	A	T	A	C	C	T	T	C	C	C	A	G	G	T	A	A	C	A	A	A	C	C	G	A	T	C	T	C	T	T	G	T	A	G	A	T	C	G	T	T	C	T
505	Delta	>143375|1|265	G	G	T	T	T	A	T	A	C	C	T	T	C	C	C	A	G	G	T	A	A	C	A	A	A	C	C	G	A	T	C	T	C	T	T	G	T	A	G	A	T	C	G	T	T	C	T
506	Delta	>143374|1|265	G	G	T	T	T	A	T	A	C	C	T	T	C	C	C	A	G	G	T	A	A	C	A	A	A	C	C	G	A	T	C	T	C	T	T	G	T	A	G	A	T	C	G	T	T	C	T
507	Delta	>143373|1|265	G	G	T	T	T	A	T	A	C	C	T	T	C	C	C	A	G	G	T	A	A	C	A	A	A	C	C	G	A	T	C	T	C	T	T	G	T	A	G	A	T	C	G	T	T	C	T
508	Delta	>143372|1|265	G	G	T	T	T	A	T	A	C	C	T	T	C	C	C	A	G	G	T	A	A	C	A	A	A	C	C	G	A	T	C	T	C	T	T	G	T	A	G	A	T	C	G	T	T	C	T
509	Delta	>143371|1|265	G	G	T	T	T	A	T	A	C	C	T	T	C	C	C	A	G	G	T	A	A	C	A	A	A	C	C	G	A	T	C	T	C	T	T	G	T	A	G	A	T	C	G	T	T	C	T
510	Delta	>143370|1|265	G	G	T	T	T	A	T	A	C	C	T	T	C	C	C	A	G	G	T	A	A	C	A	A	A	C	C	G	A	T	C	T	C	T	T	G	T	A	G	A	T	C	G	T	T	C	T
511	Delta	>143368|1|265	G	G	T	T	T	A	T	A	C	C	T	T	C	C	C	A	G	G	T	A	A	C	A	A	A	C	C	G	A	T	C	T	C	T	T	G	T	A	G	A	T	C	G	T	T	C	T
512	Delta	>143367|1|265	G	G	T	T	T	A	T	A	C	C	T	T	C	C	C	A	G	G	T	A	A	C	A	A	A	C	C	G	A	T	C	T	C	T	T	G	T	A	G	A	T	C	G	T	T	C	T
513	Delta	>143366|1|265	G	G	T	T	T	A	T	A	C	C	T	T	C	C	C	A	G	G	T	A	A	C	A	A	A	C	C	G	A	T	C	T	C	T	T	G	T	A	G	A	T	C	G	T	T	C	T
514	Delta	>143365|1|265	G	G	T	T	T	A	T	A	C	C	T	T	C	C	C	A	G	G	T	A	A	C	A	A	A	C	C	G	A	T	C	T	C	T	T	G	T	A	G	A	T	C	G	T	T	C	T
515	Delta	>143364|1|265	G	G	T	T	T	A	T	A	C	C	T	T	C	C	C	A	G	G	T	A	A	C	A	A	A	C	C	G	A	T	C	T	C	T	T	G	T	A	G	A	T	C	G	T	T	C	T
516	Delta	>143363|1|265	G	G	T	T	T	A	T	A	C	C	T	T	C	C	C	A	G	G	T	A	A	C	A	A	A	C	C	G	A	T	C	T	C	T	T	G	T	A	G	A	T	C	G	T	T	C	T
517	Delta	>143362|1|265	G	G	T	T	T	A	T	A	C	C	T	T	C	C	C	A	G	G	T	A	A	C	A	A	A	C	C	G	A	T	C	T	C	T	T	G	T	A	G	A	T	C	G	T	T	C	T
518	Delta	>143361|1|265	G	G	T	T	T	A	T	A	C	C	T	T	C	C	C	A	G	G	T	A	A	C	A	A	A	C	C	G	A	T	C	T	C	T	T	G	T	A	G	A	T	C	G	T	T	C	T
519	Delta	>143360|1|265	G	G	T	T	T	A	T	A	C	C	T	T	C	C	C	A	G	G	T	A	A	C	A	A	A	C	C	G	A	T	C	T	C	T	T	G	T	A	G	A	T	C	G	T	T	C	T
520	Delta	>143359|1|265	G	G	T	T	T	A	T	A	C	C	T	T	C	C	C	A	G	G	T	A	A	C	A	A	A	C	C	G	A	T	C	T	C	T	T	G	T	A	G	A	T	C	G	T	T	C	T
521	Delta	>143358|1|265	G	G	T	T	T	A	T	A	C	C	T	T	C	C	C	A	G	G	T	A	A	C	A	A	A	C	C	G	A	T	C	T	C	T	T	G	T	A	G	A	T	C	G	T	T	C	T
522	Delta	>143357|1|265	G	G	T	T	T	A	T	A	C	C	T	T	C	C	C	A	G	G	T	A	A	C	A	A	A	C	C	G	A	T	C	T	C	T	T	G	T	A	G	A	T	C	G	T	T	C	T
523	Delta	>143356|1|265	G	G	T	T	T	A	T	A	C	C	T	T	C	C	C	A	G	G	T	A	A	C	A	A	A	C	C	G	A	T	C	T	C	T	T	G	T	A	G	A	T	C	G	T	T	C	T
524	Delta	>143355|1|265	G	G	T	T	T	A	T	A	C	C	T	T	C	C	C	A	G	G	T	A	A	C	A	A	A	C	C	G	A	T	C	T	C	T	T	G	T	A	G	A	T	C	G	T	T	C	T
525	Delta	>143354|1|265	G	G	T	T	T	A	T	A	C	C	T	T	C	C	C	A	G	G	T	A	A	C	A	A	A	C	C	G	A	T	C	T	C	T	T	G	T	A	G	A	T	C	G	T	T	C	T
526	Delta	>143353|1|265	G	G	T	T	T	A	T	A	C	C	T	T	C	C	C	A	G	G	T	A	A	C	A	A	A	C	C	G	A	T	C	T	C	T	T	G	T	A	G	A	T	C	G	T	T	C	T
527	Delta	>143352|1|265	G	G	T	T	T	A	T	A	C	C	T	T	C	C	C	A	G	G	T	A	A	C	A	A	A	C	C	G	A	T	C	T	C	T	T	G	T	A	G	A	T	C	G	T	T	C	T
528	Delta	>143351|1|265	G	G	T	T	T	A	T	A	C	C	T	T	C	C	C	A	G	G	T	A	A	C	A	A	A	C	C	G	A	T	C	T	C	T	T	G	T	A	G	A	T	C	G	T	T	C	T
529	Delta	>143350|1|265	G	G	T	T	T	A	T	A	C	C	T	T	C	C	C	A	G	G	T	A	A	C	A	A	A	C	C	G	A	T	C	T	C	T	T	G	T	A	G	A	T	C	G	T	T	C	T
530	Delta	>143349|1|265	G	G	T	T	T	A	T	A	C	C	T	T	C	C	C	A	G	G	T	A	A	C	A	A	A	C	C	G	A	T	C	T	C	T	T	G	T	A	G	A	T	C	G	T	T	C	T
531	Delta	>143348|1|265	G	G	T	T	T	A	T	A	C	C	T	T	C	C	C	A	G	G	T	A	A	C	A	A	A	C	C	G	A	T	C	T	C	T	T	G	T	A	G	A	T	C	G	T	T	C	T
532	Delta	>143347|1|265	G	G	T	T	T	A	T	A	C	C	T	T	C	C	C	A	G	G	T	A	A	C	A	A	A	C	C	G	A	T	C	T	C	T	T	G	T	A	G	A	T	C	G	T	T	C	T
533	Delta	>143346|1|265	G	G	T	T	T	A	T	A	C	C	T	T	C	C	C	A	G	G	T	A	A	C	A	A	A	C	C	G	A	T	C	T	C	T	T	G	T	A	G	A	T	C	G	T	T	C	T
534	Delta	>143345|1|265	G	G	T	T	T	A	T	A	C	C	T	T	C	C	C	A	G	G	T	A	A	C	A	A	A	C	C	G	A	T	C	T	C	T	T	G	T	A	G	A	T	C	G	T	T	C	T
535	Delta	>143344|1|265	G	G	T	T	T	A	T	A	C	C	T	T	C	C	C	A	G	G	T	A	A	C	A	A	A	C	C	G	A	T	C	T	C	T	T	G	T	A	G	A	T	C	G	T	T	C	T
536	Delta	>143342|1|265	G	G	T	T	T	A	T	A	C	C	T	T	C	C	C	A	G	G	T	A	A	C	A	A	A	C	C	G	A	T	C	T	C	T	T	G	T	A	G	A	T	C	G	T	T	C	T
537	Delta	>143341|1|265	G	G	T	T	T	A	T	A	C	C	T	T	C	C	C	A	G	G	T	A	A	C	A	A	A	C	C	G	A	T	C	T	C	T	T	G	T	A	G	A	T	C	G	T	T	C	T
538	Delta	>143340|1|265	G	G	T	T	T	A	T	A	C	C	T	T	C	C	C	A	G	G	T	A	A	C	A	A	A	C	C	G	A	T	C	T	C	T	T	G	T	A	G	A	T	C	G	T	T	C	T
539	Delta	>143339|1|265	G	G	T	T	T	A	T	A	C	C	T	T	C	C	C	A	G	G	T	A	A	C	A	A	A	C	C	G	A	T	C	T	C	T	T	G	T	A	G	A	T	C	G	T	T	C	T
540	Delta	>143338|1|265	G	G	T	T	T	A	T	A	C	C	T	T	C	C	C	A	G	G	T	A	A	C	A	A	A	C	C	G	A	T	C	T	C	T	T	G	T	A	G	A	T	C	G	T	T	C	T
541	Delta	>143337|1|265	G	G	T	T	T	A	T	A	C	C	T	T	C	C	C	A	G	G	T	A	A	C	A	A	A	C	C	G	A	T	C	T	C	T	T	G	T	A	G	A	T	C	G	T	T	C	T
542	Delta	>143336|1|265	G	G	T	T	T	A	T	A	C	C	T	T	C	C	C	A	G	G	T	A	A	C	A	A	A	C	C	G	A	T	C	T	C	T	T	G	T	A	G	A	T	C	G	T	T	C	T
543	Delta	>143046|1|265	G	G	T	T	T	A	T	A	C	C	T	T	C	C	C	A	G	G	T	A	A	C	A	A	A	C	C	G	A	T	C	T	C	T	T	G	T	A	G	A	T	C	G	T	T	C	T
544	Delta	>143044|1|265	G	G	T	T	T	A	T	A	C	C	T	T	C	C	C	A	G	G	T	A	A	C	A	A	A	C	C	G	A	T	C	T	C	T	T	G	T	A	G	A	T	C	G	T	T	C	T
545	Delta	>143043|1|265	G	G	T	T	T	A	T	A	C	C	T	T	C	C	C	A	G	G	T	A	A	C	A	A	A	C	C	G	A	T	C	T	C	T	T	G	T	A	G	A	T	C	G	T	T	C	T
546	Delta	>143042|1|265	G	G	T	T	T	A	T	A	C	C	T	T	C	C	C	A	G	G	T	A	A	C	A	A	A	C	C	G	A	T	C	T	C	T	T	G	T	A	G	A	T	C	G	T	T	C	T
547	Delta	>143038|1|265	G	G	T	T	T	A	T	A	C	C	T	T	C	C	C	A	G	G	T	A	A	C	A	A	A	C	C	G	A	T	C	T	C	T	T	G	T	A	G	A	T	C	G	T	T	C	T
548	Delta	>143018|1|265	G	G	T	T	T	A	T	A	C	C	T	T	C	C	C	A	G	G	T	A	A	C	A	A	A	C	C	G	A	T	C	T	C	T	T	G	T	A	G	A	T	C	G	T	T	C	T
549	Delta	>143011|1|265	G	G	T	T	T	A	T	A	C	C	T	T	C	C	C	A	G	G	T	A	A	C	A	A	A	C	C	G	A	T	C	T	C	T	T	G	T	A	G	A	T	C	G	T	T	C	T
550	Delta	>142999|1|265	G	G	T	T	T	A	T	A	C	C	T	T	C	C	C	A	G	G	T	A	A	C	A	A	A	C	C	G	A	T	C	T	C	T	T	G	T	A	G	A	T	C	G	T	T	C	T
551	Delta	>142981|1|265	G	G	T	T	T	A	T	A	C	C	T	T	C	C	C	A	G	G	T	A	A	C	A	A	A	C	C	G	A	T	C	T	C	T	T	G	T	A	G	A	T	C	G	T	T	C	T
552	Delta	>142682|1|265	G	G	T	T	T	A	T	A	C	C	T	T	C	C	C	A	G	G	T	A	A	C	A	A	A	C	C	G	A	T	C	T	C	T	T	G	T	A	G	A	T	C	G	T	T	C	T
553	Delta	>142676|1|265	G	G	T	T	T	A	T	A	C	C	T	T	C	C	C	A	G	G	T	A	A	C	A	A	A	C	C	G	A	T	C	T	C	T	T	G	T	A	G	A	T	C	G	T	T	C	T
554	Delta	>142675|1|265	G	G	T	T	T	A	T	A	C	C	T	T	C	C	C	A	G	G	T	A	A	C	A	A	A	C	C	G	A	T	C	T	C	T	T	G	T	A	G	A	T	C	G	T	T	C	T
555	Delta	>142641|1|265	G	G	T	T	T	A	T	A	C	C	T	T	C	C	C	A	G	G	T	A	A	C	A	A	A	C	C	G	A	T	C	T	C	T	T	G	T	A	G	A	T	C	G	T	T	C	T
556	Delta	>142637|1|265	G	G	T	T	T	A	T	A	C	C	T	T	C	C	C	A	G	G	T	A	A	C	A	A	A	C	C	G	A	T	C	T	C	T	T	G	T	A	G	A	T	C	G	T	T	C	T
557	Delta	>142636|1|265	G	G	T	T	T	A	T	A	C	C	T	T	C	C	C	A	G	G	T	A	A	C	A	A	A	C	C	G	A	T	C	T	C	T	T	G	T	A	G	A	T	C	G	T	T	C	T
558	Delta	>142635|1|265	G	G	T	T	T	A	T	A	C	C	T	T	C	C	C	A	G	G	T	A	A	C	A	A	A	C	C	G	A	T	C	T	C	T	T	G	T	A	G	A	T	C	G	T	T	C	T
559	Delta	>142612|1|265	G	G	T	T	T	A	T	A	C	C	T	T	C	C	C	A	G	G	T	A	A	C	A	A	A	C	C	G	A	T	C	T	C	T	T	G	T	A	G	A	T	C	G	T	T	C	T
560	Delta	>142569|1|265	G	G	T	T	T	A	T	A	C	C	T	T	C	C	C	A	G	G	T	A	A	C	A	A	A	C	C	G	A	T	C	T	C	T	T	G	T	A	G	A	T	C	G	T	T	C	T
561	Delta	>142214|1|265	G	G	T	T	T	A	T	A	C	C	T	T	C	C	C	A	G	G	T	A	A	C	A	A	A	C	C	G	A	T	C	T	C	T	T	G	T	A	G	A	T	C	G	T	T	C	T
562	Delta	>142120|1|265	G	G	T	T	T	A	T	A	C	C	T	T	C	C	C	A	G	G	T	A	A	C	A	A	A	C	C	G	A	T	C	T	C	T	T	G	T	A	G	A	T	C	G	T	T	C	T
563	Delta	>142119|1|265	G	G	T	T	T	A	T	A	C	C	T	T	C	C	C	A	G	G	T	A	A	C	A	A	A	C	C	G	A	T	C	T	C	T	T	G	T	A	G	A	T	C	G	T	T	C	T
564	Delta	>142118|1|265	G	G	T	T	T	A	T	A	C	C	T	T	C	C	C	A	G	G	T	A	A	C	A	A	A	C	C	G	A	T	C	T	C	T	T	G	T	A	G	A	T	C	G	T	T	C	T
565	Delta	>142117|1|265	G	G	T	T	T	A	T	A	C	C	T	T	C	C	C	A	G	G	T	A	A	C	A	A	A	C	C	G	A	T	C	T	C	T	T	G	T	A	G	A	T	C	G	T	T	C	T
566	Delta	>142106|1|265	G	G	T	T	T	A	T	A	C	C	T	T	C	C	C	A	G	G	T	A	A	C	A	A	A	C	C	G	A	T	C	T	C	T	T	G	T	A	G	A	T	C	G	T	T	C	T
567	Delta	>142104|1|265	G	G	T	T	T	A	T	A	C	C	T	T	C	C	C	A	G	G	T	A	A	C	A	A	A	C	C	G	A	T	C	T	C	T	T	G	T	A	G	A	T	C	G	T	T	T	T
568	Delta	>141982|1|265	G	G	T	T	T	A	T	A	C	C	T	T	C	C	C	A	G	G	T	A	A	C	A	A	A	C	C	G	A	T	C	T	C	T	T	G	T	A	G	A	T	C	G	T	T	C	T
569	Delta	>141894|1|265	G	G	T	T	T	A	T	A	C	C	T	T	C	C	C	A	G	G	T	A	A	C	A	A	A	C	C	G	A	T	C	T	C	T	T	G	T	A	G	A	T	C	G	T	T	C	T
570	Delta	>141893|1|265	G	G	T	T	T	A	T	A	C	C	T	T	C	C	C	A	G	G	T	A	A	C	A	A	A	C	C	G	A	T	C	T	C	T	T	G	T	A	G	A	T	C	G	T	T	C	T
571	Delta	>138373|1|265	G	G	T	T	T	A	T	A	C	C	T	T	C	C	C	A	G	G	T	A	A	C	A	A	A	C	C	G	A	T	C	T	C	T	T	G	T	A	G	A	T	C	G	T	T	C	T
572	Delta	>138178|1|265	G	G	T	T	T	A	T	A	C	C	T	T	C	C	C	A	G	G	T	A	A	C	A	A	A	C	C	G	A	T	C	T	C	T	T	G	T	A	G	A	T	C	G	T	T	C	T
573	Delta	>137899|1|265	G	G	T	T	T	A	T	A	C	C	T	T	C	C	C	A	G	G	T	A	A	C	A	A	A	C	C	G	A	T	C	T	C	T	T	G	T	A	G	A	T	C	G	T	T	C	T
574	Delta	>137898|1|265	G	G	T	T	T	A	T	A	C	C	T	T	C	C	C	A	G	G	T	A	A	C	A	A	A	C	C	G	A	T	C	T	C	T	T	G	T	A	G	A	T	C	G	T	T	C	T
575	Delta	>137897|1|265	G	G	T	T	T	A	T	A	C	C	T	T	C	C	C	A	G	G	T	A	A	C	A	A	A	C	C	G	A	T	C	T	C	T	T	G	T	A	G	A	T	C	G	T	T	C	T
576	Delta	>137896|1|265	G	G	T	T	T	A	T	A	C	C	T	T	C	C	C	A	G	G	T	A	A	C	A	A	A	C	C	G	A	T	C	T	C	T	T	G	T	A	G	A	T	C	G	T	T	C	T
577	Delta	>137895|1|265	G	G	T	T	T	A	T	A	C	C	T	T	C	C	C	A	G	G	T	A	A	C	A	A	A	C	C	G	A	T	C	T	C	T	T	G	T	A	G	A	T	C	G	T	T	C	T
578	Delta	>137894|1|265	G	G	T	T	T	A	T	A	C	C	T	T	C	C	C	A	G	G	T	A	A	C	A	A	A	C	C	G	A	T	C	T	C	T	T	G	T	A	G	A	T	C	G	T	T	C	T
579	Delta	>137893|1|265	G	G	T	T	T	A	T	A	C	C	T	T	C	C	C	A	G	G	T	A	A	C	A	A	A	C	C	G	A	T	C	T	C	T	T	G	T	A	G	A	T	C	G	T	T	C	T
580	Delta	>137892|1|265	G	G	T	T	T	A	T	A	C	C	T	T	C	C	C	A	G	G	T	A	A	C	A	A	A	C	C	G	A	T	C	T	C	T	T	G	T	A	G	A	T	C	G	T	T	C	T
581	Delta	>137891|1|265	G	G	T	T	T	A	T	A	C	C	T	T	C	C	C	A	G	G	T	A	A	C	A	A	A	C	C	G	A	T	C	T	C	T	T	G	T	A	G	A	T	C	G	T	T	C	T
582	Delta	>137890|1|265	G	G	T	T	T	A	T	A	C	C	T	T	C	C	C	A	G	G	T	A	A	C	A	A	A	C	C	G	A	T	C	T	C	T	T	G	T	A	G	A	T	C	G	T	T	C	T
583	Delta	>137889|1|265	G	G	T	T	T	A	T	A	C	C	T	T	C	C	C	A	G	G	T	A	A	C	A	A	A	C	C	G	A	T	C	T	C	T	T	G	T	A	G	A	T	C	G	T	T	C	T
584	Delta	>137888|1|265	G	G	T	T	T	A	T	A	C	C	T	T	C	C	C	A	G	G	T	A	A	C	A	A	A	C	C	G	A	T	C	T	C	T	T	G	T	A	G	A	T	C	G	T	T	C	T
585	Delta	>137887|1|265	G	G	T	T	T	A	T	A	C	C	T	T	C	C	C	A	G	G	T	A	A	C	A	A	A	C	C	G	A	T	C	T	C	T	T	G	T	A	G	A	T	C	G	T	T	C	T
586	Delta	>137885|1|265	G	G	T	T	T	A	T	A	C	C	T	T	C	C	C	A	G	G	T	A	A	C	A	A	A	C	C	G	A	T	C	T	C	T	T	G	T	A	G	A	T	C	G	T	T	C	T
587	Delta	>137884|1|265	G	G	T	T	T	A	T	A	C	C	T	T	C	C	C	A	G	G	T	A	A	C	A	A	A	C	C	G	A	T	C	T	C	T	T	G	T	A	G	A	T	C	G	T	T	C	T
588	Delta	>137883|1|265	G	G	T	T	T	A	T	A	C	C	T	T	C	C	C	A	G	G	T	A	A	C	A	A	A	C	C	G	A	T	C	T	C	T	T	G	T	A	G	A	T	C	G	T	T	C	T
589	Delta	>137877|1|265	G	G	T	T	T	A	T	A	C	C	T	T	C	C	C	A	G	G	T	A	A	C	A	A	A	C	C	G	A	T	C	T	C	T	T	G	T	A	G	A	T	C	G	T	T	C	T
590	Delta	>137624|1|265	G	G	T	T	T	A	T	A	C	C	T	T	C	C	C	A	G	G	T	A	A	C	A	A	A	C	C	G	A	T	C	T	C	T	T	G	T	A	G	A	T	C	G	T	T	C	T
591	Delta	>137515|1|265	G	G	T	T	T	A	T	A	C	C	T	T	C	C	C	A	G	G	T	A	A	C	A	A	A	C	C	G	A	T	C	T	C	T	T	G	T	A	G	A	T	C	G	T	T	C	T
592	Delta	>137514|1|265	G	G	T	T	T	A	T	A	C	C	T	T	C	C	C	A	G	G	T	A	A	C	A	A	A	C	C	G	A	T	C	T	C	T	T	G	T	A	G	A	T	C	G	T	T	C	T
593	Delta	>137509|1|265	G	G	T	T	T	A	T	A	C	C	T	T	C	C	C	A	G	G	T	A	A	C	A	A	A	C	C	G	A	T	C	T	C	T	T	G	T	A	G	A	T	C	G	T	T	C	T
594	Delta	>137508|1|265	G	G	T	T	T	A	T	A	C	C	T	T	C	C	C	A	G	G	T	A	A	C	A	A	A	C	C	G	A	T	C	T	C	T	T	G	T	A	G	A	T	C	G	T	T	C	T
595	Delta	>137489|1|265	G	G	T	T	T	A	T	A	C	C	T	T	C	C	C	A	G	G	T	A	A	C	A	A	A	C	C	G	A	T	C	T	C	T	T	G	T	A	G	A	T	C	G	T	T	C	T
596	Delta	>137488|1|265	G	G	T	T	T	A	T	A	C	C	T	T	C	C	C	A	G	G	T	A	A	C	A	A	A	C	C	G	A	T	C	T	C	T	T	G	T	A	G	A	T	C	G	T	T	C	T
597	Delta	>137486|1|265	G	G	T	T	T	A	T	A	C	C	T	T	C	C	C	A	G	G	T	A	A	C	A	A	A	C	C	G	A	T	C	T	C	T	T	G	T	A	G	A	T	C	G	T	T	C	T
598	Delta	>137485|1|265	G	G	T	T	T	A	T	A	C	C	T	T	C	C	C	A	G	G	T	A	A	C	A	A	A	C	C	G	A	T	C	T	C	T	T	G	T	A	G	A	T	C	G	T	T	C	T
599	Delta	>137484|1|265	G	G	T	T	T	A	T	A	C	C	T	T	C	C	C	A	G	G	T	A	A	C	A	A	A	C	C	G	A	T	C	T	C	T	T	G	T	A	G	A	T	C	G	T	T	C	T
600	Delta	>137192|1|265	G	G	T	T	T	A	T	A	C	C	T	T	C	C	C	A	G	G	T	A	A	C	A	A	A	C	C	G	A	T	C	T	C	T	T	G	T	A	G	A	T	C	G	T	T	C	T
601	Delta	>137040|1|265	G	G	T	T	T	A	T	A	C	C	T	T	C	C	C	A	G	G	T	A	A	C	A	A	A	C	C	G	A	T	C	T	C	T	T	G	T	A	G	A	T	C	G	T	T	C	T
602	Delta	>137030|1|265	G	G	T	T	T	A	T	A	C	C	T	T	C	C	C	A	G	G	T	A	A	C	A	A	A	C	C	G	A	T	C	T	C	T	T	G	T	A	G	A	T	C	G	T	T	C	T
603	Delta	>136909|1|265	G	G	T	T	T	A	T	A	C	C	T	T	C	C	C	A	G	G	T	A	A	C	A	A	A	C	C	G	A	T	C	T	C	T	T	G	T	A	G	A	T	C	G	T	T	C	T
604	Delta	>136908|1|265	G	G	T	T	T	A	T	A	C	C	T	T	C	C	C	A	G	G	T	A	A	C	A	A	A	C	C	G	A	T	C	T	C	T	T	G	T	A	G	A	T	C	G	T	T	C	T
605	Delta	>136907|1|265	G	G	T	T	T	A	T	A	C	C	T	T	C	C	C	A	G	G	T	A	A	C	A	A	A	C	C	G	A	T	C	T	C	T	T	G	T	A	G	A	T	C	G	T	T	C	T
606	Delta	>136902|1|265	G	G	T	T	T	A	T	A	C	C	T	T	C	C	C	A	G	G	T	A	A	C	A	A	A	C	C	G	A	T	C	T	C	T	T	G	T	A	G	A	T	C	G	T	T	C	T
607	Delta	>136634|1|265	G	G	T	T	T	A	T	A	C	C	T	T	C	C	C	A	G	G	T	A	A	C	A	A	A	C	C	G	A	T	C	T	C	T	T	G	T	A	G	A	T	C	G	T	T	C	T
608	Delta	>136633|1|265	G	G	T	T	T	A	T	A	C	C	T	T	C	C	C	A	G	G	T	A	A	C	A	A	A	C	C	G	A	T	C	T	C	T	T	G	T	A	G	A	T	C	G	T	T	C	T
609	Delta	>136057|1|265	G	G	T	T	T	A	T	A	C	C	T	T	C	C	C	A	G	G	T	A	A	C	A	A	A	C	C	G	A	T	C	T	C	T	T	G	T	A	G	A	T	C	G	T	T	C	T
610	Delta	>135694|1|265	G	G	T	T	T	A	T	A	C	C	T	T	C	C	C	A	G	G	T	A	A	C	A	A	A	C	C	G	A	T	C	T	C	T	T	G	T	A	G	A	T	C	G	T	T	C	T
611	Delta	>135506|1|265	G	G	T	T	T	A	T	A	C	C	T	T	C	C	C	A	G	G	T	A	A	C	A	A	A	C	C	G	A	T	C	T	C	T	T	G	T	A	G	A	T	C	G	T	T	C	T
612	Delta	>135432|1|265	G	G	T	T	T	A	T	A	C	C	T	T	C	C	C	A	G	G	T	A	A	C	A	A	A	C	C	G	A	T	C	T	C	T	T	G	T	A	G	A	T	C	G	T	T	C	T
613	Delta	>135242|1|265	G	G	T	T	T	A	T	A	C	C	T	T	C	C	C	A	G	G	T	A	A	C	A	A	A	C	C	G	A	T	C	T	C	T	T	G	T	A	G	A	T	C	G	T	T	C	T
614	Delta	>135231|1|265	G	G	T	T	T	A	T	A	C	C	T	T	C	C	C	A	G	G	T	A	A	C	A	A	A	C	C	G	A	T	C	T	C	T	T	G	T	A	G	A	T	C	G	T	T	C	T
615	Delta	>135177|1|265	G	G	T	T	T	A	T	A	C	C	T	T	C	C	C	A	G	G	T	A	A	C	A	A	A	C	C	G	A	T	C	T	C	T	T	G	T	A	G	A	T	C	G	T	T	C	T
616	Delta	>134935|1|265	G	G	T	T	T	A	T	A	C	C	T	T	C	C	C	A	G	G	T	A	A	C	A	A	A	C	C	G	A	T	C	T	C	T	T	G	T	A	G	A	T	C	G	T	T	C	T
617	Delta	>134816|1|265	G	G	T	T	T	A	T	A	C	C	T	T	C	C	C	A	G	G	T	A	A	C	A	A	A	C	C	G	A	T	C	T	C	T	T	G	T	A	G	A	T	C	G	T	T	C	T
618	Delta	>134814|1|265	G	G	T	T	T	A	T	A	C	C	T	T	C	C	C	A	G	G	T	A	A	C	A	A	A	C	C	G	A	T	C	T	C	T	T	G	T	A	G	A	T	C	G	T	T	C	T
619	Delta	>134812|1|265	G	G	T	T	T	A	T	A	C	C	T	T	C	C	C	A	G	G	T	A	A	C	A	A	A	C	C	G	A	T	C	T	C	T	T	G	T	A	G	A	T	C	G	T	T	C	T
620	Delta	>134811|1|265	G	G	T	T	T	A	T	A	C	C	T	T	C	C	C	A	G	G	T	A	A	C	A	A	A	C	C	G	A	T	C	T	C	T	T	G	T	A	G	A	T	C	G	T	T	C	T
621	Delta	>134810|1|265	G	G	T	T	T	A	T	A	C	C	T	T	C	C	C	A	G	G	T	A	A	C	A	A	A	C	C	G	A	T	C	T	C	T	T	G	T	A	G	A	T	C	G	T	T	C	T
622	Delta	>134809|1|265	G	G	T	T	T	A	T	A	C	C	T	T	C	C	C	A	G	G	T	A	A	C	A	A	A	C	C	G	A	T	C	T	C	T	T	G	T	A	G	A	T	C	G	T	T	C	T
623	Delta	>134808|1|265	G	G	T	T	T	A	T	A	C	C	T	T	C	C	C	A	G	G	T	A	A	C	A	A	A	C	C	G	A	T	C	T	C	T	T	G	T	A	G	A	T	C	G	T	T	C	T
624	Delta	>134806|1|265	G	G	T	T	T	A	T	A	C	C	T	T	C	C	C	A	G	G	T	A	A	C	A	A	A	C	C	G	A	T	C	T	C	T	T	G	T	A	G	A	T	C	G	T	T	C	T
625	Delta	>134805|1|265	G	G	T	T	T	A	T	A	C	C	T	T	C	C	C	A	G	G	T	A	A	C	A	A	A	C	C	G	A	T	C	T	C	T	T	G	T	A	G	A	T	C	G	T	T	C	T
626	Delta	>134803|1|265	G	G	T	T	T	A	T	A	C	C	T	T	C	C	C	A	G	G	T	A	A	C	A	A	A	C	C	G	A	T	C	T	C	T	T	G	T	A	G	A	T	C	G	T	T	C	T
627	Delta	>134801|1|265	G	G	T	T	T	A	T	A	C	C	T	T	C	C	C	A	G	G	T	A	A	C	A	A	A	C	C	G	A	T	C	T	C	T	T	G	T	A	G	A	T	C	G	T	T	C	T
628	Delta	>134799|1|265	G	G	T	T	T	A	T	A	C	C	T	T	C	C	C	A	G	G	T	A	A	C	A	A	A	C	C	G	A	T	C	T	C	T	T	G	T	A	G	A	T	C	G	T	T	C	T
629	Delta	>134798|1|265	G	G	T	T	T	A	T	A	C	C	T	T	C	C	C	A	G	G	T	A	A	C	A	A	A	C	C	G	A	T	C	T	C	T	T	G	T	A	G	A	T	C	G	T	T	C	T
630	Delta	>134796|1|265	G	G	T	T	T	A	T	A	C	C	T	T	C	C	C	A	G	G	T	A	A	C	A	A	A	C	C	G	A	T	C	T	C	T	T	G	T	A	G	A	T	C	G	T	T	C	T
631	Delta	>134795|1|265	G	G	T	T	T	A	T	A	C	C	T	T	C	C	C	A	G	G	T	A	A	C	A	A	A	C	C	G	A	T	C	T	C	T	T	G	T	A	G	A	T	C	G	T	T	C	T
632	Delta	>134794|1|265	G	G	T	T	T	A	T	A	C	C	T	T	C	C	C	A	G	G	T	A	A	C	A	A	A	C	C	G	A	T	C	T	C	T	T	G	T	A	G	A	T	C	G	T	T	C	T
633	Delta	>134793|1|265	G	G	T	T	T	A	T	A	C	C	T	T	C	C	C	A	G	G	T	A	A	C	A	A	A	C	C	G	A	T	C	T	C	T	T	G	T	A	G	A	T	C	G	T	T	C	T
634	Delta	>134792|1|265	G	G	T	T	T	A	T	A	C	C	T	T	C	C	C	A	G	G	T	A	A	C	A	A	A	C	C	G	A	T	C	T	C	T	T	G	T	A	G	A	T	C	G	T	T	C	T
635	Delta	>134791|1|265	G	G	T	T	T	A	T	A	C	C	T	T	C	C	C	A	G	G	T	A	A	C	A	A	A	C	C	G	A	T	C	T	C	T	T	G	T	A	G	A	T	C	G	T	T	C	T
636	Delta	>134790|1|265	G	G	T	T	T	A	T	A	C	C	T	T	C	C	C	A	G	G	T	A	A	C	A	A	A	C	C	G	A	T	C	T	C	T	T	G	T	A	G	A	T	C	G	T	T	C	T
637	Delta	>134789|1|265	G	G	T	T	T	A	T	A	C	C	T	T	C	C	C	A	G	G	T	A	A	C	A	A	A	C	C	G	A	T	C	T	C	T	T	G	T	A	G	A	T	C	G	T	T	C	T
638	Delta	>134788|1|265	G	G	T	T	T	A	T	A	C	C	T	T	C	C	C	A	G	G	T	A	A	C	A	A	A	C	C	G	A	T	C	T	C	T	T	G	T	A	G	A	T	C	G	T	T	C	T
639	Delta	>134786|1|265	G	G	T	T	T	A	T	A	C	C	T	T	C	C	C	A	G	G	T	A	A	C	A	A	A	C	C	G	A	T	C	T	C	T	T	G	T	A	G	A	T	C	G	T	T	C	T
640	Delta	>134785|1|265	G	G	T	T	T	A	T	A	C	C	T	T	C	C	C	A	G	G	T	A	A	C	A	A	A	C	C	G	A	T	C	T	C	T	T	G	T	A	G	A	T	C	G	T	T	C	T
641	Delta	>134784|1|265	G	G	T	T	T	A	T	A	C	C	T	T	C	C	C	A	G	G	T	A	A	C	A	A	A	C	C	G	A	T	C	T	C	T	T	G	T	A	G	A	T	C	G	T	T	C	T
642	Delta	>134783|1|265	G	G	T	T	T	A	T	A	C	C	T	T	C	C	C	A	G	G	T	A	A	C	A	A	A	C	C	G	A	T	C	T	C	T	T	G	T	A	G	A	T	C	G	T	T	C	T
643	Delta	>134782|1|265	G	G	T	T	T	A	T	A	C	C	T	T	C	C	C	A	G	G	T	A	A	C	A	A	A	C	C	G	A	T	C	T	C	T	T	G	T	A	G	A	T	C	G	T	T	C	T
644	Delta	>134781|1|265	G	G	T	T	T	A	T	A	C	C	T	T	C	C	C	A	G	G	T	A	A	C	A	A	A	C	C	G	A	T	C	T	C	T	T	G	T	A	G	A	T	C	G	T	T	C	T
645	Delta	>134780|1|265	G	G	T	T	T	A	T	A	C	C	T	T	C	C	C	A	G	G	T	A	A	C	A	A	A	C	C	G	A	T	C	T	C	T	T	G	T	A	G	A	T	C	G	T	T	C	T
646	Delta	>134779|1|265	G	G	T	T	T	A	T	A	C	C	T	T	C	C	C	A	G	G	T	A	A	C	A	A	A	C	C	G	A	T	C	T	C	T	T	G	T	A	G	A	T	C	G	T	T	C	T
647	Delta	>134778|1|265	G	G	T	T	T	A	T	A	C	C	T	T	C	C	C	A	G	G	T	A	A	C	A	A	A	C	C	G	A	T	C	T	C	T	T	G	T	A	G	A	T	C	G	T	T	C	T
648	Delta	>134777|1|265	G	G	T	T	T	A	T	A	C	C	T	T	C	C	C	A	G	G	T	A	A	C	A	A	A	C	C	G	A	T	C	T	C	T	T	G	T	A	G	A	T	C	G	T	T	C	T
649	Delta	>134776|1|265	G	G	T	T	T	A	T	A	C	C	T	T	C	C	C	A	G	G	T	A	A	C	A	A	A	C	C	G	A	T	C	T	C	T	T	G	T	A	G	A	T	C	G	T	T	C	T
650	Delta	>134775|1|265	G	G	T	T	T	A	T	A	C	C	T	T	C	C	C	A	G	G	T	A	A	C	A	A	A	C	C	G	A	T	C	T	C	T	T	G	T	A	G	A	T	C	G	T	T	C	T
651	Delta	>134774|1|265	G	G	T	T	T	A	T	A	C	C	T	T	C	C	C	A	G	G	T	A	A	C	A	A	A	C	C	G	A	T	C	T	C	T	T	G	T	A	G	A	T	C	G	T	T	C	T
652	Delta	>134773|1|265	G	G	T	T	T	A	T	A	C	C	T	T	C	C	C	A	G	G	T	A	A	C	A	A	A	C	C	G	A	T	C	T	C	T	T	G	T	A	G	A	T	C	G	T	T	C	T
653	Delta	>134772|1|265	G	G	T	T	T	A	T	A	C	C	T	T	C	C	C	A	G	G	T	A	A	C	A	A	A	C	C	G	A	T	C	T	C	T	T	G	T	A	G	A	T	C	G	T	T	C	T
654	Delta	>134771|1|265	G	G	T	T	T	A	T	A	C	C	T	T	C	C	C	A	G	G	T	A	A	C	A	A	A	C	C	G	A	T	C	T	C	T	T	G	T	A	G	A	T	C	G	T	T	C	T
655	Delta	>134770|1|265	G	G	T	T	T	A	T	A	C	C	T	T	C	C	C	A	G	G	T	A	A	C	A	A	A	C	C	G	A	T	C	T	C	T	T	G	T	A	G	A	T	C	G	T	T	C	T
656	Delta	>134769|1|265	G	G	T	T	T	A	T	A	C	C	T	T	C	C	C	A	G	G	T	A	A	C	A	A	A	C	C	G	A	T	C	T	C	T	T	G	T	A	G	A	T	C	G	T	T	C	T
657	Delta	>134768|1|265	G	G	T	T	T	A	T	A	C	C	T	T	C	C	C	A	G	G	T	A	A	C	A	A	A	C	C	G	A	T	C	T	C	T	T	G	T	A	G	A	T	C	G	T	T	C	T
658	Delta	>134767|1|265	G	G	T	T	T	A	T	A	C	C	T	T	C	C	C	A	G	G	T	A	A	C	A	A	A	C	C	G	A	T	C	T	C	T	T	G	T	A	G	A	T	C	G	T	T	C	T
659	Delta	>134766|1|265	G	G	T	T	T	A	T	A	C	C	T	T	C	C	C	A	G	G	T	A	A	C	A	A	A	C	C	G	A	T	C	T	C	T	T	G	T	A	G	A	T	C	G	T	T	C	T
660	Delta	>134765|1|265	G	G	T	T	T	A	T	A	C	C	T	T	C	C	C	A	G	G	T	A	A	C	A	A	A	C	C	G	A	T	C	T	C	T	T	G	T	A	G	A	T	C	G	T	T	C	T
661	Delta	>134763|1|265	G	G	T	T	T	A	T	A	C	C	T	T	C	C	C	A	G	G	T	A	A	C	A	A	A	C	C	G	A	T	C	T	C	T	T	G	T	A	G	A	T	C	G	T	T	C	T
662	Delta	>134762|1|265	G	G	T	T	T	A	T	A	C	C	T	T	C	C	C	A	G	G	T	A	A	C	A	A	A	C	C	G	A	T	C	T	C	T	T	G	T	A	G	A	T	C	G	T	T	C	T
663	Delta	>134761|1|265	G	G	T	T	T	A	T	A	C	C	T	T	C	C	C	A	G	G	T	A	A	C	A	A	A	C	C	G	A	T	C	T	C	T	T	G	T	A	G	A	T	C	G	T	T	C	T
664	Delta	>134759|1|265	G	G	T	T	T	A	T	A	C	C	T	T	C	C	C	A	G	G	T	A	A	C	A	A	A	C	C	G	A	T	C	T	C	T	T	G	T	A	G	A	T	C	G	T	T	C	T
665	Delta	>134758|1|265	G	G	T	T	T	A	T	A	C	C	T	T	C	C	C	A	G	G	T	A	A	C	A	A	A	C	C	G	A	T	C	T	C	T	T	G	T	A	G	A	T	C	G	T	T	C	T
666	Delta	>134757|1|265	G	G	T	T	T	A	T	A	C	C	T	T	C	C	C	A	G	G	T	A	A	C	A	A	A	C	C	G	A	T	C	T	C	T	T	G	T	A	G	A	T	C	G	T	T	C	T
667	Delta	>134756|1|265	G	G	T	T	T	A	T	A	C	C	T	T	C	C	C	A	G	G	T	A	A	C	A	A	A	C	C	G	A	T	C	T	C	T	T	G	T	A	G	A	T	C	G	T	T	C	T
668	Delta	>134755|1|265	G	G	T	T	T	A	T	A	C	C	T	T	C	C	C	A	G	G	T	A	A	C	A	A	A	C	C	G	A	T	C	T	C	T	T	G	T	A	G	A	T	C	G	T	T	C	T
669	Delta	>134754|1|265	G	G	T	T	T	A	T	A	C	C	T	T	C	C	C	A	G	G	T	A	A	C	A	A	A	C	C	G	A	T	C	T	C	T	T	G	T	A	G	A	T	C	G	T	T	C	T
670	Delta	>134753|1|265	G	G	T	T	T	A	T	A	C	C	T	T	C	C	C	A	G	G	T	A	A	C	A	A	A	C	C	G	A	T	C	T	C	T	T	G	T	A	G	A	T	C	G	T	T	C	T
671	Delta	>134752|1|265	G	G	T	T	T	A	T	A	C	C	T	T	C	C	C	A	G	G	T	A	A	C	A	A	A	C	C	G	A	T	C	T	C	T	T	G	T	A	G	A	T	C	G	T	T	C	T
672	Delta	>134751|1|265	G	G	T	T	T	A	T	A	C	C	T	T	C	C	C	A	G	G	T	A	A	C	A	A	A	C	C	G	A	T	C	T	C	T	T	G	T	A	G	A	T	C	G	T	T	C	T
673	Delta	>134750|1|265	G	G	T	T	T	A	T	A	C	C	T	T	C	C	C	A	G	G	T	A	A	C	A	A	A	C	C	G	A	T	C	T	C	T	T	G	T	A	G	A	T	C	G	T	T	C	T
674	Delta	>134749|1|265	G	G	T	T	T	A	T	A	C	C	T	T	C	C	C	A	G	G	T	A	A	C	A	A	A	C	C	G	A	T	C	T	C	T	T	G	T	A	G	A	T	C	G	T	T	C	T
675	Delta	>134748|1|265	G	G	T	T	T	A	T	A	C	C	T	T	C	C	C	A	G	G	T	A	A	C	A	A	A	C	C	G	A	T	C	T	C	T	T	G	T	A	G	A	T	C	G	T	T	C	T
676	Delta	>134747|1|265	G	G	T	T	T	A	T	A	C	C	T	T	C	C	C	A	G	G	T	A	A	C	A	A	A	C	C	G	A	T	C	T	C	T	T	G	T	A	G	A	T	C	G	T	T	C	T
677	Delta	>134746|1|265	G	G	T	T	T	A	T	A	C	C	T	T	C	C	C	A	G	G	T	A	A	C	A	A	A	C	C	G	A	T	C	T	C	T	T	G	T	A	G	A	T	C	G	T	T	C	T
678	Delta	>134745|1|265	G	G	T	T	T	A	T	A	C	C	T	T	C	C	C	A	G	G	T	A	A	C	A	A	A	C	C	G	A	T	C	T	C	T	T	G	T	A	G	A	T	C	G	T	T	C	T
679	Delta	>134744|1|265	G	G	T	T	T	A	T	A	C	C	T	T	C	C	C	A	G	G	T	A	A	C	A	A	A	C	C	G	A	T	C	T	C	T	T	G	T	A	G	A	T	C	G	T	T	C	T
680	Delta	>134742|1|265	G	G	T	T	T	A	T	A	C	C	T	T	C	C	C	A	G	G	T	A	A	C	A	A	A	C	C	G	A	T	C	T	C	T	T	G	T	A	G	A	T	C	G	T	T	C	T
681	Delta	>134741|1|265	G	G	T	T	T	A	T	A	C	C	T	T	C	C	C	A	G	G	T	A	A	C	A	A	A	C	C	G	A	T	C	T	C	T	T	G	T	A	G	A	T	C	G	T	T	C	T
682	Delta	>134740|1|265	G	G	T	T	T	A	T	A	C	C	T	T	C	C	C	A	G	G	T	A	A	C	A	A	A	C	C	G	A	T	C	T	C	T	T	G	T	A	G	A	T	C	G	T	T	C	T
683	Delta	>134739|1|265	G	G	T	T	T	A	T	A	C	C	T	T	C	C	C	A	G	G	T	A	A	C	A	A	A	C	C	G	A	T	C	T	C	T	T	G	T	A	G	A	T	C	G	T	T	C	T
684	Delta	>134738|1|265	G	G	T	T	T	A	T	A	C	C	T	T	C	C	C	A	G	G	T	A	A	C	A	A	A	C	C	G	A	T	C	T	C	T	T	G	T	A	G	A	T	C	G	T	T	C	T
685	Delta	>134737|1|265	G	G	T	T	T	A	T	A	C	C	T	T	C	C	C	A	G	G	T	A	A	C	A	A	A	C	C	G	A	T	C	T	C	T	T	G	T	A	G	A	T	C	G	T	T	C	T
686	Delta	>134736|1|265	G	G	T	T	T	A	T	A	C	C	T	T	C	C	C	A	G	G	T	A	A	C	A	A	A	C	C	G	A	T	C	T	C	T	T	G	T	A	G	A	T	C	G	T	T	C	T
687	Delta	>134735|1|265	G	G	T	T	T	A	T	A	C	C	T	T	C	C	C	A	G	G	T	A	A	C	A	A	A	C	C	G	A	T	C	T	C	T	T	G	T	A	G	A	T	C	G	T	T	C	T
688	Delta	>134732|1|265	G	G	T	T	T	A	T	A	C	C	T	T	C	C	C	A	G	G	T	A	A	C	A	A	A	C	C	G	A	T	C	T	C	T	T	G	T	A	G	A	T	C	G	T	T	C	T
689	Delta	>134731|1|265	G	G	T	T	T	A	T	A	C	C	T	T	C	C	C	A	G	G	T	A	A	C	A	A	A	C	C	G	A	T	C	T	C	T	T	G	T	A	G	A	T	C	G	T	T	C	T
690	Delta	>134730|1|265	G	G	T	T	T	A	T	A	C	C	T	T	C	C	C	A	G	G	T	A	A	C	A	A	A	C	C	G	A	T	C	T	C	T	T	G	T	A	G	A	T	C	G	T	T	C	T
691	Delta	>134729|1|265	G	G	T	T	T	A	T	A	C	C	T	T	C	C	C	A	G	G	T	A	A	C	A	A	A	C	C	G	A	T	C	T	C	T	T	G	T	A	G	A	T	C	G	T	T	C	T
692	Delta	>134727|1|265	G	G	T	T	T	A	T	A	C	C	T	T	C	C	C	A	G	G	T	A	A	C	A	A	A	C	C	G	A	T	C	T	C	T	T	G	T	A	G	A	T	C	G	T	T	C	T
693	Delta	>134726|1|265	G	G	T	T	T	A	T	A	C	C	T	T	C	C	C	A	G	G	T	A	A	C	A	A	A	C	C	G	A	T	C	T	C	T	T	G	T	A	G	A	T	C	G	T	T	C	T
694	Delta	>134724|1|265	G	G	T	T	T	A	T	A	C	C	T	T	C	C	C	A	G	G	T	A	A	C	A	A	A	C	C	G	A	T	C	T	C	T	T	G	T	A	G	A	T	C	G	T	T	C	T
695	Delta	>134723|1|265	G	G	T	T	T	A	T	A	C	C	T	T	C	C	C	A	G	G	T	A	A	C	A	A	A	C	C	G	A	T	C	T	C	T	T	G	T	A	G	A	T	C	G	T	T	C	T
696	Delta	>134722|1|265	G	G	T	T	T	A	T	A	C	C	T	T	C	C	C	A	G	G	T	A	A	C	A	A	A	C	C	G	A	T	C	T	C	T	T	G	T	A	G	A	T	C	G	T	T	C	T
697	Delta	>134721|1|265	G	G	T	T	T	A	T	A	C	C	T	T	C	C	C	A	G	G	T	A	A	C	A	A	A	C	C	G	A	T	C	T	C	T	T	G	T	A	G	A	T	C	G	T	T	C	T
698	Delta	>134720|1|265	G	G	T	T	T	A	T	A	C	C	T	T	C	C	C	A	G	G	T	A	A	C	A	A	A	C	C	G	A	T	C	T	C	T	T	G	T	A	G	A	T	C	G	T	T	C	T
699	Delta	>134719|1|265	G	G	T	T	T	A	T	A	C	C	T	T	C	C	C	A	G	G	T	A	A	C	A	A	A	C	C	G	A	T	C	T	C	T	T	G	T	A	G	A	T	C	G	T	T	C	T
700	Delta	>134718|1|265	G	G	T	T	T	A	T	A	C	C	T	T	C	C	C	A	G	G	T	A	A	C	A	A	A	C	C	G	A	T	C	T	C	T	T	G	T	A	G	A	T	C	G	T	T	C	T
701	Delta	>134717|1|265	G	G	T	T	T	A	T	A	C	C	T	T	C	C	C	A	G	G	T	A	A	C	A	A	A	C	C	G	A	T	C	T	C	T	T	G	T	A	G	A	T	C	G	T	T	C	T
702	Delta	>134716|1|265	G	G	T	T	T	A	T	A	C	C	T	T	C	C	C	A	G	G	T	A	A	C	A	A	A	C	C	G	A	T	C	T	C	T	T	G	T	A	G	A	T	C	G	T	T	C	T
703	Delta	>134715|1|265	G	G	T	T	T	A	T	A	C	C	T	T	C	C	C	A	G	G	T	A	A	C	A	A	A	C	C	G	A	T	C	T	C	T	T	G	T	A	G	A	T	C	G	T	T	C	T
704	Delta	>134714|1|265	G	G	T	T	T	A	T	A	C	C	T	T	C	C	C	A	G	G	T	A	A	C	A	A	A	C	C	G	A	T	C	T	C	T	T	G	T	A	G	A	T	C	G	T	T	C	T
705	Delta	>134713|1|265	G	G	T	T	T	A	T	A	C	C	T	T	C	C	C	A	G	G	T	A	A	C	A	A	A	C	C	G	A	T	C	T	C	T	T	G	T	A	G	A	T	C	G	T	T	C	T
706	Delta	>134712|1|265	G	G	T	T	T	A	T	A	C	C	T	T	C	C	C	A	G	G	T	A	A	C	A	A	A	C	C	G	A	T	C	T	C	T	T	G	T	A	G	A	T	C	G	T	T	C	T
707	Delta	>134711|1|265	G	G	T	T	T	A	T	A	C	C	T	T	C	C	C	A	G	G	T	A	A	C	A	A	A	C	C	G	A	T	C	T	C	T	T	G	T	A	G	A	T	C	G	T	T	C	T
708	Delta	>134710|1|265	G	G	T	T	T	A	T	A	C	C	T	T	C	C	C	A	G	G	T	A	A	C	A	A	A	C	C	G	A	T	C	T	C	T	T	G	T	A	G	A	T	C	G	T	T	C	T
709	Delta	>134709|1|265	G	G	T	T	T	A	T	A	C	C	T	T	C	C	C	A	G	G	T	A	A	C	A	A	A	C	C	G	A	T	C	T	C	T	T	G	T	A	G	A	T	C	G	T	T	C	T
710	Delta	>134708|1|265	G	G	T	T	T	A	T	A	C	C	T	T	C	C	C	A	G	G	T	A	A	C	A	A	A	C	C	G	A	T	C	T	C	T	T	G	T	A	G	A	T	C	G	T	T	C	T
711	Delta	>134707|1|265	G	G	T	T	T	A	T	A	C	C	T	T	C	C	C	A	G	G	T	A	A	C	A	A	A	C	C	G	A	T	C	T	C	T	T	G	T	A	G	A	T	C	G	T	T	C	T
712	Delta	>134706|1|265	G	G	T	T	T	A	T	A	C	C	T	T	C	C	C	A	G	G	T	A	A	C	A	A	A	C	C	G	A	T	C	T	C	T	T	G	T	A	G	A	T	C	G	T	T	C	T
713	Delta	>134704|1|265	G	G	T	T	T	A	T	A	C	C	T	T	C	C	C	A	G	G	T	A	A	C	A	A	A	C	C	G	A	T	C	T	C	T	T	G	T	A	G	A	T	C	G	T	T	C	T
714	Delta	>134703|1|265	G	G	T	T	T	A	T	A	C	C	T	T	C	C	C	A	G	G	T	A	A	C	A	A	A	C	C	G	A	T	C	T	C	T	T	G	T	A	G	A	T	C	G	T	T	C	T
715	Delta	>134701|1|265	G	G	T	T	T	A	T	A	C	C	T	T	C	C	C	A	G	G	T	A	A	C	A	A	A	C	C	G	A	T	C	T	C	T	T	G	T	A	G	A	T	C	G	T	T	C	T
716	Delta	>134700|1|265	G	G	T	T	T	A	T	A	C	C	T	T	C	C	C	A	G	G	T	A	A	C	A	A	A	C	C	G	A	T	C	T	C	T	T	G	T	A	G	A	T	C	G	T	T	C	T
717	Delta	>134699|1|265	G	G	T	T	T	A	T	A	C	C	T	T	C	C	C	A	G	G	T	A	A	C	A	A	A	C	C	G	A	T	C	T	C	T	T	G	T	A	G	A	T	C	G	T	T	C	T
718	Delta	>134698|1|265	G	G	T	T	T	A	T	A	C	C	T	T	C	C	C	A	G	G	T	A	A	C	A	A	A	C	C	G	A	T	C	T	C	T	T	G	T	A	G	A	T	C	G	T	T	C	T
719	Delta	>134696|1|265	G	G	T	T	T	A	T	A	C	C	T	T	C	C	C	A	G	G	T	A	A	C	A	A	A	C	C	G	A	T	C	T	C	T	T	G	T	A	G	A	T	C	G	T	T	C	T
720	Delta	>134695|1|265	G	G	T	T	T	A	T	A	C	C	T	T	C	C	C	A	G	G	T	A	A	C	A	A	A	C	C	G	A	T	C	T	C	T	T	G	T	A	G	A	T	C	G	T	T	C	T
721	Delta	>134694|1|265	G	G	T	T	T	A	T	A	C	C	T	T	C	C	C	A	G	G	T	A	A	C	A	A	A	C	C	G	A	T	C	T	C	T	T	G	T	A	G	A	T	C	G	T	T	C	T
722	Delta	>134693|1|265	G	G	T	T	T	A	T	A	C	C	T	T	C	C	C	A	G	G	T	A	A	C	A	A	A	C	C	G	A	T	C	T	C	T	T	G	T	A	G	A	T	C	G	T	T	C	T
723	Delta	>134692|1|265	G	G	T	T	T	A	T	A	C	C	T	T	C	C	C	A	G	G	T	A	A	C	A	A	A	C	C	G	A	T	C	T	C	T	T	G	T	A	G	A	T	C	G	T	T	C	T
724	Delta	>134691|1|265	G	G	T	T	T	A	T	A	C	C	T	T	C	C	C	A	G	G	T	A	A	C	A	A	A	C	C	G	A	T	C	T	C	T	T	G	T	A	G	A	T	C	G	T	T	C	T
725	Delta	>134689|1|265	G	G	T	T	T	A	T	A	C	C	T	T	C	C	C	A	G	G	T	A	A	C	A	A	A	C	C	G	A	T	C	T	C	T	T	G	T	A	G	A	T	C	G	T	T	C	T
726	Delta	>134688|1|265	G	G	T	T	T	A	T	A	C	C	T	T	C	C	C	A	G	G	T	A	A	C	A	A	A	C	C	G	A	T	C	T	C	T	T	G	T	A	G	A	T	C	G	T	T	C	T
727	Delta	>134687|1|265	G	G	T	T	T	A	T	A	C	C	T	T	C	C	C	A	G	G	T	A	A	C	A	A	A	C	C	G	A	T	C	T	C	T	T	G	T	A	G	A	T	C	G	T	T	C	T
728	Delta	>134686|1|265	G	G	T	T	T	A	T	A	C	C	T	T	C	C	C	A	G	G	T	A	A	C	A	A	A	C	C	G	A	T	C	T	C	T	T	G	T	A	G	A	T	C	G	T	T	C	T
729	Delta	>134685|1|265	G	G	T	T	T	A	T	A	C	C	T	T	C	C	C	A	G	G	T	A	A	C	A	A	A	C	C	G	A	T	C	T	C	T	T	G	T	A	G	A	T	C	G	T	T	C	T
730	Delta	>134684|1|265	G	G	T	T	T	A	T	A	C	C	T	T	C	C	C	A	G	G	T	A	A	C	A	A	A	C	C	G	A	T	C	T	C	T	T	G	T	A	G	A	T	C	G	T	T	C	T
731	Delta	>134682|1|265	G	G	T	T	T	A	T	A	C	C	T	T	C	C	C	A	G	G	T	A	A	C	A	A	A	C	C	G	A	T	C	T	C	T	T	G	T	A	G	A	T	C	G	T	T	C	T
732	Delta	>134681|1|265	G	G	T	T	T	A	T	A	C	C	T	T	C	C	C	A	G	G	T	A	A	C	A	A	A	C	C	G	A	T	C	T	C	T	T	G	T	A	G	A	T	C	G	T	T	C	T
733	Delta	>134680|1|265	G	G	T	T	T	A	T	A	C	C	T	T	C	C	C	A	G	G	T	A	A	C	A	A	A	C	C	G	A	T	C	T	C	T	T	G	T	A	G	A	T	C	G	T	T	C	T
734	Delta	>134679|1|265	G	G	T	T	T	A	T	A	C	C	T	T	C	C	C	A	G	G	T	A	A	C	A	A	A	C	C	G	A	T	C	T	C	T	T	G	T	A	G	A	T	C	G	T	T	C	T
735	Delta	>134678|1|265	G	G	T	T	T	A	T	A	C	C	T	T	C	C	C	A	G	G	T	A	A	C	A	A	A	C	C	G	A	T	C	T	C	T	T	G	T	A	G	A	T	C	G	T	T	C	T
736	Delta	>134677|1|265	G	G	T	T	T	A	T	A	C	C	T	T	C	C	C	A	G	G	T	A	A	C	A	A	A	C	C	G	A	T	C	T	C	T	T	G	T	A	G	A	T	C	G	T	T	C	T
737	Delta	>134676|1|265	G	G	T	T	T	A	T	A	C	C	T	T	C	C	C	A	G	G	T	A	A	C	A	A	A	C	C	G	A	T	C	T	C	T	T	G	T	A	G	A	T	C	G	T	T	C	T
738	Delta	>134675|1|265	G	G	T	T	T	A	T	A	C	C	T	T	C	C	C	A	G	G	T	A	A	C	A	A	A	C	C	G	A	T	C	T	C	T	T	G	T	A	G	A	T	C	G	T	T	C	T
739	Delta	>134673|1|265	G	G	T	T	T	A	T	A	C	C	T	T	C	C	C	A	G	G	T	A	A	C	A	A	A	C	C	G	A	T	C	T	C	T	T	G	T	A	G	A	T	C	G	T	T	C	T
740	Delta	>134672|1|265	G	G	T	T	T	A	T	A	C	C	T	T	C	C	C	A	G	G	T	A	A	C	A	A	A	C	C	G	A	T	C	T	C	T	T	G	T	A	G	A	T	C	G	T	T	C	T
741	Delta	>134671|1|265	G	G	T	T	T	A	T	A	C	C	T	T	C	C	C	A	G	G	T	A	A	C	A	A	A	C	C	G	A	T	C	T	C	T	T	G	T	A	G	A	T	C	G	T	T	C	T
742	Delta	>134670|1|265	G	G	T	T	T	A	T	A	C	C	T	T	C	C	C	A	G	G	T	A	A	C	A	A	A	C	C	G	A	T	C	T	C	T	T	G	T	A	G	A	T	C	G	T	T	C	T
743	Delta	>134669|1|265	G	G	T	T	T	A	T	A	C	C	T	T	C	C	C	A	G	G	T	A	A	C	A	A	A	C	C	G	A	T	C	T	C	T	T	G	T	A	G	A	T	C	G	T	T	C	T
744	Delta	>134667|1|265	G	G	T	T	T	A	T	A	C	C	T	T	C	C	C	A	G	G	T	A	A	C	A	A	A	C	C	G	A	T	C	T	C	T	T	G	T	A	G	A	T	C	G	T	T	C	T
745	Delta	>134666|1|265	G	G	T	T	T	A	T	A	C	C	T	T	C	C	C	A	G	G	T	A	A	C	A	A	A	C	C	G	A	T	C	T	C	T	T	G	T	A	G	A	T	C	G	T	T	C	T
746	Delta	>134665|1|265	G	G	T	T	T	A	T	A	C	C	T	T	C	C	C	A	G	G	T	A	A	C	A	A	A	C	C	G	A	T	C	T	C	T	T	G	T	A	G	A	T	C	G	T	T	C	T
747	Delta	>134664|1|265	G	G	T	T	T	A	T	A	C	C	T	T	C	C	C	A	G	G	T	A	A	C	A	A	A	C	C	G	A	T	C	T	C	T	T	G	T	A	G	A	T	C	G	T	T	C	T
748	Delta	>134663|1|265	G	G	T	T	T	A	T	A	C	C	T	T	C	C	C	A	G	G	T	A	A	C	A	A	A	C	C	G	A	T	C	T	C	T	T	G	T	A	G	A	T	C	G	T	T	C	T
749	Delta	>134662|1|265	G	G	T	T	T	A	T	A	C	C	T	T	C	C	C	A	G	G	T	A	A	C	A	A	A	C	C	G	A	T	C	T	C	T	T	G	T	A	G	A	T	C	G	T	T	C	T
750	Delta	>134661|1|265	G	G	T	T	T	A	T	A	C	C	T	T	C	C	C	A	G	G	T	A	A	C	A	A	A	C	C	G	A	T	C	T	C	T	T	G	T	A	G	A	T	C	G	T	T	C	T
751	Delta	>134660|1|265	G	G	T	T	T	A	T	A	C	C	T	T	C	C	C	A	G	G	T	A	A	C	A	A	A	C	C	G	A	T	C	T	C	T	T	G	T	A	G	A	T	C	G	T	T	C	T
752	Delta	>134658|1|265	G	G	T	T	T	A	T	A	C	C	T	T	C	C	C	A	G	G	T	A	A	C	A	A	A	C	C	G	A	T	C	T	C	T	T	G	T	A	G	A	T	C	G	T	T	C	T
753	Delta	>134657|1|265	G	G	T	T	T	A	T	A	C	C	T	T	C	C	C	A	G	G	T	A	A	C	A	A	A	C	C	G	A	T	C	T	C	T	T	G	T	A	G	A	T	C	G	T	T	C	T
754	Delta	>134656|1|265	G	G	T	T	T	A	T	A	C	C	T	T	C	C	C	A	G	G	T	A	A	C	A	A	A	C	C	G	A	T	C	T	C	T	T	G	T	A	G	A	T	C	G	T	T	C	T
755	Delta	>134655|1|265	G	G	T	T	T	A	T	A	C	C	T	T	C	C	C	A	G	G	T	A	A	C	A	A	A	C	C	G	A	T	C	T	C	T	T	G	T	A	G	A	T	C	G	T	T	C	T
756	Delta	>134654|1|265	G	G	T	T	T	A	T	A	C	C	T	T	C	C	C	A	G	G	T	A	A	C	A	A	A	C	C	G	A	T	C	T	C	T	T	G	T	A	G	A	T	C	G	T	T	C	T
757	Delta	>134653|1|265	G	G	T	T	T	A	T	A	C	C	T	T	C	C	C	A	G	G	T	A	A	C	A	A	A	C	C	G	A	T	C	T	C	T	T	G	T	A	G	A	T	C	G	T	T	C	T
758	Delta	>134652|1|265	G	G	T	T	T	A	T	A	C	C	T	T	C	C	C	A	G	G	T	A	A	C	A	A	A	C	C	G	A	T	C	T	C	T	T	G	T	A	G	A	T	C	G	T	T	C	T
759	Delta	>134651|1|265	G	G	T	T	T	A	T	A	C	C	T	T	C	C	C	A	G	G	T	A	A	C	A	A	A	C	C	G	A	T	C	T	C	T	T	G	T	A	G	A	T	C	G	T	T	C	T
760	Delta	>134650|1|265	G	G	T	T	T	A	T	A	C	C	T	T	C	C	C	A	G	G	T	A	A	C	A	A	A	C	C	G	A	T	C	T	C	T	T	G	T	A	G	A	T	C	G	T	T	C	T
761	Delta	>134649|1|265	G	G	T	T	T	A	T	A	C	C	T	T	C	C	C	A	G	G	T	A	A	C	A	A	A	C	C	G	A	T	C	T	C	T	T	G	T	A	G	A	T	C	G	T	T	C	T
762	Delta	>134648|1|265	G	G	T	T	T	A	T	A	C	C	T	T	C	C	C	A	G	G	T	A	A	C	A	A	A	C	C	G	A	T	C	T	C	T	T	G	T	A	G	A	T	C	G	T	T	C	T
763	Delta	>134647|1|265	G	G	T	T	T	A	T	A	C	C	T	T	C	C	C	A	G	G	T	A	A	C	A	A	A	C	C	G	A	T	C	T	C	T	T	G	T	A	G	A	T	C	G	T	T	C	T
764	Delta	>134646|1|265	G	G	T	T	T	A	T	A	C	C	T	T	C	C	C	A	G	G	T	A	A	C	A	A	A	C	C	G	A	T	C	T	C	T	T	G	T	A	G	A	T	C	G	T	T	C	T
765	Delta	>134629|1|265	G	G	T	T	T	A	T	A	C	C	T	T	C	C	C	A	G	G	T	A	A	C	A	A	A	C	C	G	A	T	C	T	C	T	T	G	T	A	G	A	T	C	G	T	T	C	T
766	Delta	>134606|1|265	G	G	T	T	T	A	T	A	C	C	T	T	C	C	C	A	G	G	T	A	A	C	A	A	A	C	C	G	A	T	C	T	C	T	T	G	T	A	G	A	T	C	G	T	T	C	T
767	Delta	>134605|1|265	G	G	T	T	T	A	T	A	C	C	T	T	C	C	C	A	G	G	T	A	A	C	A	A	A	C	C	G	A	T	C	T	C	T	T	G	T	A	G	A	T	C	G	T	T	C	T
768	Delta	>134604|1|265	G	G	T	T	T	A	T	A	C	C	T	T	C	C	C	A	G	G	T	A	A	C	A	A	A	C	C	G	A	T	C	T	C	T	T	G	T	A	G	A	T	C	G	T	T	C	T
769	Delta	>134383|1|265	G	G	T	T	T	A	T	A	C	C	T	T	C	C	C	A	G	G	T	A	A	C	A	A	A	C	C	G	A	T	C	T	C	T	T	G	T	A	G	A	T	C	G	T	T	C	T
770	Delta	>134381|1|265	G	G	T	T	T	A	T	A	C	C	T	T	C	C	C	A	G	G	T	A	A	C	A	A	A	C	C	G	A	T	C	T	C	T	T	G	T	A	G	A	T	C	G	T	T	C	T
771	Delta	>134378|1|265	G	G	T	T	T	A	T	A	C	C	T	T	C	C	C	A	G	G	T	A	A	C	A	A	A	C	C	G	A	T	C	T	C	T	T	G	T	A	G	A	T	C	G	T	T	C	T
772	Delta	>134377|1|265	G	G	T	T	T	A	T	A	C	C	T	T	C	C	C	A	G	G	T	A	A	C	A	A	A	C	C	G	A	T	C	T	C	T	T	G	T	A	G	A	T	C	G	T	T	C	T
773	Delta	>134375|1|265	G	G	T	T	T	A	T	A	C	C	T	T	C	C	C	A	G	G	T	A	A	C	A	A	A	C	C	G	A	T	C	T	C	T	T	G	T	A	G	A	T	C	G	T	T	C	T
774	Delta	>134371|1|265	G	G	T	T	T	A	T	A	C	C	T	T	C	C	C	A	G	G	T	A	A	C	A	A	A	C	C	G	A	T	C	T	C	T	T	G	T	A	G	A	T	C	G	T	T	C	T
775	Delta	>134102|1|265	G	G	T	T	T	A	T	A	C	C	T	T	C	C	C	A	G	G	T	A	A	C	A	A	A	C	C	G	A	T	C	T	C	T	T	G	T	A	G	A	T	C	G	T	T	C	T
776	Delta	>134050|1|265	G	G	T	T	T	A	T	A	C	C	T	T	C	C	C	A	G	G	T	A	A	C	A	A	A	C	C	G	A	T	C	T	C	T	T	G	T	A	G	A	T	C	G	T	T	C	T
777	Delta	>133412|1|265	G	G	T	T	T	A	T	A	C	C	T	T	C	C	C	A	G	G	T	A	A	C	A	A	A	C	C	G	A	T	C	T	C	T	T	G	T	A	G	A	T	C	G	T	T	C	T
778	Delta	>133409|1|265	G	G	T	T	T	A	T	A	C	C	T	T	C	C	C	A	G	G	T	A	A	C	A	A	A	C	C	G	A	T	C	T	C	T	T	G	T	A	G	A	T	C	G	T	T	C	T
779	Delta	>133407|1|265	G	G	T	T	T	A	T	A	C	C	T	T	C	C	C	A	G	G	T	A	A	C	A	A	A	C	C	G	A	T	C	T	C	T	T	G	T	A	G	A	T	C	G	T	T	C	T
780	Delta	>133401|1|265	G	G	T	T	T	A	T	A	C	C	T	T	C	C	C	A	G	G	T	A	A	C	A	A	A	C	C	G	A	T	C	T	C	T	T	G	T	A	G	A	T	C	G	T	T	C	T
781	Delta	>133400|1|265	G	G	T	T	T	A	T	A	C	C	T	T	C	C	C	A	G	G	T	A	A	C	A	A	A	C	C	G	A	T	C	T	C	T	T	G	T	A	G	A	T	C	G	T	T	C	T
782	Delta	>133399|1|265	G	G	T	T	T	A	T	A	C	C	T	T	C	C	C	A	G	G	T	A	A	C	A	A	A	C	C	G	A	T	C	T	C	T	T	G	T	A	G	A	T	C	G	T	T	C	T
783	Delta	>133397|1|265	G	G	T	T	T	A	T	A	C	C	T	T	C	C	C	A	G	G	T	A	A	C	A	A	A	C	C	G	A	T	C	T	C	T	T	G	T	A	G	A	T	C	G	T	T	C	T
784	Delta	>133396|1|265	G	G	T	T	T	A	T	A	C	C	T	T	C	C	C	A	G	G	T	A	A	C	A	A	A	C	C	G	A	T	C	T	C	T	T	G	T	A	G	A	T	C	G	T	T	C	T
785	Delta	>133395|1|265	G	G	T	T	T	A	T	A	C	C	T	T	C	C	C	A	G	G	T	A	A	C	A	A	A	C	C	G	A	T	C	T	C	T	T	G	T	A	G	A	T	C	G	T	T	C	T
786	Delta	>133183|1|265	G	G	T	T	T	A	T	A	C	C	T	T	C	C	C	A	G	G	T	A	A	C	A	A	A	C	C	G	A	T	C	T	C	T	T	G	T	A	G	A	T	C	G	T	T	C	T
787	Delta	>133086|1|265	G	G	T	T	T	A	T	A	C	C	T	T	C	C	C	A	G	G	T	A	A	C	A	A	A	C	C	G	A	T	C	T	C	T	T	G	T	A	G	A	T	C	G	T	T	C	T
788	Delta	>133082|1|265	G	G	T	T	T	A	T	A	C	C	T	T	C	C	C	A	G	G	T	A	A	C	A	A	A	C	C	G	A	T	C	T	C	T	T	G	T	A	G	A	T	C	G	T	T	C	T
789	Delta	>133017|1|265	G	G	T	T	T	A	T	A	C	C	T	T	C	C	C	A	G	G	T	A	A	C	A	A	A	C	C	G	A	T	C	T	C	T	T	G	T	A	G	A	T	C	G	T	T	C	T
790	Delta	>132973|1|265	G	G	T	T	T	A	T	A	C	C	T	T	C	C	C	A	G	G	T	A	A	C	A	A	A	C	C	G	A	T	C	T	C	T	T	G	T	A	G	A	T	C	G	T	T	C	T
791	Delta	>132953|1|265	G	G	T	T	T	A	T	A	C	C	T	T	C	C	C	A	G	G	T	A	A	C	A	A	A	C	C	G	A	T	C	T	C	T	T	G	T	A	G	A	T	C	G	T	T	C	T
792	Delta	>132949|1|265	G	G	T	T	T	A	T	A	C	C	T	T	C	C	C	A	G	G	T	A	A	C	A	A	A	C	C	G	A	T	C	T	C	T	T	G	T	A	G	A	T	C	G	T	T	C	T
793	Delta	>132932|1|265	G	G	T	T	T	A	T	A	C	C	T	T	C	C	C	A	G	G	T	A	A	C	A	A	A	C	C	G	A	T	C	T	C	T	T	G	T	A	G	A	T	C	G	T	T	C	T
794	Delta	>132472|1|265	G	G	T	T	T	A	T	A	C	C	T	T	C	C	C	A	G	G	T	A	A	C	A	A	A	C	C	G	A	T	C	T	C	T	T	G	T	A	G	A	T	C	G	T	T	C	T
795	Delta	>131470|1|265	G	G	T	T	T	A	T	A	C	C	T	T	C	C	C	A	G	G	T	A	A	C	A	A	A	C	C	G	A	T	C	T	C	T	T	G	T	A	G	A	T	C	G	T	T	C	T
796	Delta	>130915|1|265	G	G	T	T	T	A	T	A	C	C	T	T	C	C	C	A	G	G	T	A	A	C	A	A	A	C	C	G	A	T	C	T	C	T	T	G	T	A	G	A	T	C	G	T	T	C	T
797	Delta	>130552|1|265	G	G	T	T	T	A	T	A	C	C	T	T	C	C	C	A	G	G	T	A	A	C	A	A	A	C	C	G	A	T	C	T	C	T	T	G	T	A	G	A	T	C	G	T	T	C	T
798	Delta	>130542|1|265	G	G	T	T	T	A	T	A	C	C	T	T	C	C	C	A	G	G	T	A	A	C	A	A	A	C	C	G	A	T	C	T	C	T	T	G	T	A	G	A	T	C	G	T	T	C	T
799	Delta	>130328|1|265	G	G	T	T	T	A	T	A	C	C	T	T	C	C	C	A	G	G	T	A	A	C	A	A	A	C	C	G	A	T	C	T	C	T	T	G	T	A	G	A	T	C	G	T	T	C	T
800	Delta	>130237|1|265	G	G	T	T	T	A	T	A	C	C	T	T	C	C	C	A	G	G	T	A	A	C	A	A	A	C	C	G	A	T	C	T	C	T	T	G	T	A	G	A	T	C	G	T	T	C	T
801	Delta	>130207|1|265	G	G	T	T	T	A	T	A	C	C	T	T	C	C	C	A	G	G	T	A	A	C	A	A	A	C	C	G	A	T	C	T	C	T	T	G	T	A	G	A	T	C	G	T	T	C	T
802	Delta	>129345|1|265	G	G	T	T	T	A	T	A	C	C	T	T	C	C	C	A	G	G	T	A	A	C	A	A	A	C	C	G	A	T	C	T	C	T	T	G	T	A	G	A	T	C	G	T	T	C	T
803	Delta	>129344|1|265	G	G	T	T	T	A	T	A	C	C	T	T	C	C	C	A	G	G	T	A	A	C	A	A	A	C	C	G	A	T	C	T	C	T	T	G	T	A	G	A	T	C	G	T	T	C	T
804	Delta	>129294|1|265	G	G	T	T	T	A	T	A	C	C	T	T	C	C	C	A	G	G	T	A	A	C	A	A	A	C	C	G	A	T	C	T	C	T	T	G	T	A	G	A	T	C	G	T	T	C	T
805	Delta	>129131|1|265	G	G	T	T	T	A	T	A	C	C	T	T	C	C	C	A	G	G	T	A	A	C	A	A	A	C	C	G	A	T	C	T	C	T	T	G	T	A	G	A	T	C	G	T	T	C	T
806	Delta	>128952|1|265	G	G	T	T	T	A	T	A	C	C	T	T	C	C	C	A	G	G	T	A	A	C	A	A	A	C	C	G	A	T	C	T	C	T	T	G	T	A	G	A	T	C	G	T	T	C	T
807	Delta	>128811|1|265	G	G	T	T	T	A	T	A	C	C	T	T	C	C	C	A	G	G	T	A	A	C	A	A	A	C	C	G	A	T	C	T	C	T	T	G	T	A	G	A	T	C	G	T	T	C	T
808	Delta	>128610|1|265	G	G	T	T	T	A	T	A	C	C	T	T	C	C	C	A	G	G	T	A	A	C	A	A	A	C	C	G	A	T	C	T	C	T	T	G	T	A	G	A	T	C	G	T	T	C	T
809	Delta	>128597|1|265	G	G	T	T	T	A	T	A	C	C	T	T	C	C	C	A	G	G	T	A	A	C	A	A	A	C	C	G	A	T	C	T	C	T	T	G	T	A	G	A	T	C	G	T	T	C	T
810	Delta	>128563|1|265	G	G	T	T	T	A	T	A	C	C	T	T	C	C	C	A	G	G	T	A	A	C	A	A	A	C	C	G	A	T	C	T	C	T	T	G	T	A	G	A	T	C	G	T	T	C	T
811	Delta	>128562|1|265	G	G	T	T	T	A	T	A	C	C	T	T	C	C	C	A	G	G	T	A	A	C	A	A	A	C	C	G	A	T	C	T	C	T	T	G	T	A	G	A	T	C	G	T	T	C	T
812	Delta	>128021|1|265	G	G	T	T	T	A	T	A	C	C	T	T	C	C	C	A	G	G	T	A	A	C	A	A	A	C	C	G	A	T	C	T	C	T	T	G	T	A	G	A	T	C	G	T	T	C	T
813	Delta	>127967|1|265	G	G	T	T	T	A	T	A	C	C	T	T	C	C	C	A	G	G	T	A	A	C	A	A	A	C	C	G	A	T	C	T	C	T	T	G	T	A	G	A	T	C	G	T	T	C	T
814	Delta	>127951|1|265	G	G	T	T	T	A	T	A	C	C	T	T	C	C	C	A	G	G	T	A	A	C	A	A	A	C	C	G	A	T	C	T	C	T	T	G	T	A	G	A	T	C	G	T	T	C	T
815	Delta	>127940|1|265	G	G	T	T	T	A	T	A	C	C	T	T	C	C	C	A	G	G	T	A	A	C	A	A	A	C	C	G	A	T	C	T	C	T	T	G	T	A	G	A	T	C	G	T	T	C	T
816	Delta	>127939|1|265	G	G	T	T	T	A	T	A	C	C	T	T	C	C	C	A	G	G	T	A	A	C	A	A	A	C	C	G	A	T	C	T	C	T	T	G	T	A	G	A	T	C	G	T	T	C	T
817	Delta	>127923|1|265	G	G	T	T	T	A	T	A	C	C	T	T	C	C	C	A	G	G	T	A	A	C	A	A	A	C	C	G	A	T	C	T	C	T	T	G	T	A	G	A	T	C	G	T	T	C	T
818	Delta	>127888|1|265	G	G	T	T	T	A	T	A	C	C	T	T	C	C	C	A	G	G	T	A	A	C	A	A	A	C	C	G	A	T	C	T	C	T	T	G	T	A	G	A	T	C	G	T	T	C	T
819	Delta	>127266|1|265	G	G	T	T	T	A	T	A	C	C	T	T	C	C	C	A	G	G	T	A	A	C	A	A	A	C	C	G	A	T	C	T	C	T	T	G	T	A	G	A	T	C	G	T	T	C	T
820	Delta	>127252|1|265	G	G	T	T	T	A	T	A	C	C	T	T	C	C	C	A	G	G	T	A	A	C	A	A	A	C	C	G	A	T	C	T	C	T	T	G	T	A	G	A	T	C	G	T	T	C	T
821	Delta	>127249|1|265	G	G	T	T	T	A	T	A	C	C	T	T	C	C	C	A	G	G	T	A	A	C	A	A	A	C	C	G	A	T	C	T	C	T	T	G	T	A	G	A	T	C	G	T	T	C	T
822	Delta	>127232|1|265	G	G	T	T	T	A	T	A	C	C	T	T	C	C	C	A	G	G	T	A	A	C	A	A	A	C	C	G	A	T	C	T	C	T	T	G	T	A	G	A	T	C	G	T	T	C	T
823	Delta	>127169|1|265	G	G	T	T	T	A	T	A	C	C	T	T	C	C	C	A	G	G	T	A	A	C	A	A	A	C	C	G	A	T	C	T	C	T	T	G	T	A	G	A	T	C	G	T	T	C	T
824	Delta	>127014|1|265	G	G	T	T	T	A	T	A	C	C	T	T	C	C	C	A	G	G	T	A	A	C	A	A	A	C	C	G	A	T	C	T	C	T	T	G	T	A	G	A	T	C	G	T	T	C	T
825	Delta	>126801|1|265	G	G	T	T	T	A	T	A	C	C	T	T	C	C	C	A	G	G	T	A	A	C	A	A	A	C	C	G	A	T	C	T	C	T	T	G	T	A	G	A	T	C	G	T	T	C	T
826	Delta	>126785|1|265	G	G	T	T	T	A	T	A	C	C	T	T	C	C	C	A	G	G	T	A	A	C	A	A	A	C	C	G	A	T	C	T	C	T	T	G	T	A	G	A	T	C	G	T	T	C	T
827	Delta	>126471|1|265	G	G	T	T	T	A	T	A	C	C	T	T	C	C	C	A	G	G	T	A	A	C	A	A	A	C	C	G	A	T	C	T	C	T	T	G	T	A	G	A	T	C	G	T	T	C	T
828	Delta	>126469|1|265	G	G	T	T	T	A	T	A	C	C	T	T	C	C	C	A	G	G	T	A	A	C	A	A	A	C	C	G	A	T	C	T	C	T	T	G	T	A	G	A	T	C	G	T	T	C	T
829	Delta	>126467|1|265	G	G	T	T	T	A	T	A	C	C	T	T	C	C	C	A	G	G	T	A	A	C	A	A	A	C	C	G	A	T	C	T	C	T	T	G	T	A	G	A	T	C	G	T	T	C	T
830	Delta	>126465|1|265	G	G	T	T	T	A	T	A	C	C	T	T	C	C	C	A	G	G	T	A	A	C	A	A	A	C	C	G	A	T	C	T	C	T	T	G	T	A	G	A	T	C	G	T	T	C	T
831	Delta	>126462|1|265	G	G	T	T	T	A	T	A	C	C	T	T	C	C	C	A	G	G	T	A	A	C	A	A	A	C	C	G	A	T	C	T	C	T	T	G	T	A	G	A	T	C	G	T	T	C	T
832	Delta	>126092|1|265	G	G	T	T	T	A	T	A	C	C	T	T	C	C	C	A	G	G	T	A	A	C	A	A	A	C	C	G	A	T	C	T	C	T	T	G	T	A	G	A	T	C	G	T	T	C	T
833	Delta	>125364|1|265	G	G	T	T	T	A	T	A	C	C	T	T	C	C	C	A	G	G	T	A	A	C	A	A	A	C	C	G	A	T	C	T	C	T	T	G	T	A	G	A	T	C	G	T	T	C	T
834	Delta	>125362|1|265	G	G	T	T	T	A	T	A	C	C	T	T	C	C	C	A	G	G	T	A	A	C	A	A	A	C	C	G	A	T	C	T	C	T	T	G	T	A	G	A	T	C	G	T	T	C	T
835	Delta	>125204|1|265	G	G	T	T	T	A	T	A	C	C	T	T	C	C	C	A	G	G	T	A	A	C	A	A	A	C	C	G	A	T	C	T	C	T	T	G	T	A	G	A	T	C	G	T	T	C	T
836	Delta	>125202|1|265	G	G	T	T	T	A	T	A	C	C	T	T	C	C	C	A	G	G	T	A	A	C	A	A	A	C	C	G	A	T	C	T	C	T	T	G	T	A	G	A	T	C	G	T	T	C	T
837	Delta	>125201|1|265	G	G	T	T	T	A	T	A	C	C	T	T	C	C	C	A	G	G	T	A	A	C	A	A	A	C	C	G	A	T	C	T	C	T	T	G	T	A	G	A	T	C	G	T	T	C	T
838	Delta	>125200|1|265	G	G	T	T	T	A	T	A	C	C	T	T	C	C	C	A	G	G	T	A	A	C	A	A	A	C	C	G	A	T	C	T	C	T	T	G	T	A	G	A	T	C	G	T	T	C	T
839	Delta	>125198|1|265	G	G	T	T	T	A	T	A	C	C	T	T	C	C	C	A	G	G	T	A	A	C	A	A	A	C	C	G	A	T	C	T	C	T	T	G	T	A	G	A	T	C	G	T	T	C	T
840	Delta	>125197|1|265	G	G	T	T	T	A	T	A	C	C	T	T	C	C	C	A	G	G	T	A	A	C	A	A	A	C	C	G	A	T	C	T	C	T	T	G	T	A	G	A	T	C	G	T	T	C	T
841	Delta	>125196|1|265	G	G	T	T	T	A	T	A	C	C	T	T	C	C	C	A	G	G	T	A	A	C	A	A	A	C	C	G	A	T	C	T	C	T	T	G	T	A	G	A	T	C	G	T	T	C	T
842	Delta	>125195|1|265	G	G	T	T	T	A	T	A	C	C	T	T	C	C	C	A	G	G	T	A	A	C	A	A	A	C	C	G	A	T	C	T	C	T	T	G	T	A	G	A	T	C	G	T	T	C	T
843	Delta	>125194|1|265	G	G	T	T	T	A	T	A	C	C	T	T	C	C	C	A	G	G	T	A	A	C	A	A	A	C	C	G	A	T	C	T	C	T	T	G	T	A	G	A	T	C	G	T	T	C	T
844	Delta	>125193|1|265	G	G	T	T	T	A	T	A	C	C	T	T	C	C	C	A	G	G	T	A	A	C	A	A	A	C	C	G	A	T	C	T	C	T	T	G	T	A	G	A	T	C	G	T	T	C	T
845	Delta	>125192|1|265	G	G	T	T	T	A	T	A	C	C	T	T	C	C	C	A	G	G	T	A	A	C	A	A	A	C	C	G	A	T	C	T	C	T	T	G	T	A	G	A	T	C	G	T	T	C	T
846	Delta	>125191|1|265	G	G	T	T	T	A	T	A	C	C	T	T	C	C	C	A	G	G	T	A	A	C	A	A	A	C	C	G	A	T	C	T	C	T	T	G	T	A	G	A	T	C	G	T	T	C	T
847	Delta	>125190|1|265	G	G	T	T	T	A	T	A	C	C	T	T	C	C	C	A	G	G	T	A	A	C	A	A	A	C	C	G	A	T	C	T	C	T	T	G	T	A	G	A	T	C	G	T	T	C	T
848	Delta	>125189|1|265	G	G	T	T	T	A	T	A	C	C	T	T	C	C	C	A	G	G	T	A	A	C	A	A	A	C	C	G	A	T	C	T	C	T	T	G	T	A	G	A	T	C	G	T	T	C	T
849	Delta	>125188|1|265	G	G	T	T	T	A	T	A	C	C	T	T	C	C	C	A	G	G	T	A	A	C	A	A	A	C	C	G	A	T	C	T	C	T	T	G	T	A	G	A	T	C	G	T	T	C	T
850	Delta	>125187|1|265	G	G	T	T	T	A	T	A	C	C	T	T	C	C	C	A	G	G	T	A	A	C	A	A	A	C	C	G	A	T	C	T	C	T	T	G	T	A	G	A	T	C	G	T	T	C	T
851	Delta	>125186|1|265	G	G	T	T	T	A	T	A	C	C	T	T	C	C	C	A	G	G	T	A	A	C	A	A	A	C	C	G	A	T	C	T	C	T	T	G	T	A	G	A	T	C	G	T	T	C	T
852	Delta	>125185|1|265	G	G	T	T	T	A	T	A	C	C	T	T	C	C	C	A	G	G	T	A	A	C	A	A	A	C	C	G	A	T	C	T	C	T	T	G	T	A	G	A	T	C	G	T	T	C	T
853	Delta	>125184|1|265	G	G	T	T	T	A	T	A	C	C	T	T	C	C	C	A	G	G	T	A	A	C	A	A	A	C	C	G	A	T	C	T	C	T	T	G	T	A	G	A	T	C	G	T	T	C	T
854	Delta	>125183|1|265	G	G	T	T	T	A	T	A	C	C	T	T	C	C	C	A	G	G	T	A	A	C	A	A	A	C	C	G	A	T	C	T	C	T	T	G	T	A	G	A	T	C	G	T	T	C	T
855	Delta	>125182|1|265	G	G	T	T	T	A	T	A	C	C	T	T	C	C	C	A	G	G	T	A	A	C	A	A	A	C	C	G	A	T	C	T	C	T	T	G	T	A	G	A	T	C	G	T	T	C	T
856	Delta	>125181|1|265	G	G	T	T	T	A	T	A	C	C	T	T	C	C	C	A	G	G	T	A	A	C	A	A	A	C	C	G	A	T	C	T	C	T	T	G	T	A	G	A	T	C	G	T	T	C	T
857	Delta	>125180|1|265	G	G	T	T	T	A	T	A	C	C	T	T	C	C	C	A	G	G	T	A	A	C	A	A	A	C	C	G	A	T	C	T	C	T	T	G	T	A	G	A	T	C	G	T	T	C	T
858	Delta	>125179|1|265	G	G	T	T	T	A	T	A	C	C	T	T	C	C	C	A	G	G	T	A	A	C	A	A	A	C	C	G	A	T	C	T	C	T	T	G	T	A	G	A	T	C	G	T	T	C	T
859	Delta	>125178|1|265	G	G	T	T	T	A	T	A	C	C	T	T	C	C	C	A	G	G	T	A	A	C	A	A	A	C	C	G	A	T	C	T	C	T	T	G	T	A	G	A	T	C	G	T	T	C	T
860	Delta	>125177|1|265	G	G	T	T	T	A	T	A	C	C	T	T	C	C	C	A	G	G	T	A	A	C	A	A	A	C	C	G	A	T	C	T	C	T	T	G	T	A	G	A	T	C	G	T	T	C	T
861	Delta	>125176|1|265	G	G	T	T	T	A	T	A	C	C	T	T	C	C	C	A	G	G	T	A	A	C	A	A	A	C	C	G	A	T	C	T	C	T	T	G	T	A	G	A	T	C	G	T	T	C	T
862	Delta	>125175|1|265	G	G	T	T	T	A	T	A	C	C	T	T	C	C	C	A	G	G	T	A	A	C	A	A	A	C	C	G	A	T	C	T	C	T	T	G	T	A	G	A	T	C	G	T	T	C	T
863	Delta	>125174|1|265	G	G	T	T	T	A	T	A	C	C	T	T	C	C	C	A	G	G	T	A	A	C	A	A	A	C	C	G	A	T	C	T	C	T	T	G	T	A	G	A	T	C	G	T	T	C	T
864	Delta	>125173|1|265	G	G	T	T	T	A	T	A	C	C	T	T	C	C	C	A	G	G	T	A	A	C	A	A	A	C	C	G	A	T	C	T	C	T	T	G	T	A	G	A	T	C	G	T	T	C	T
865	Delta	>125170|1|265	G	G	T	T	T	A	T	A	C	C	T	T	C	C	C	A	G	G	T	A	A	C	A	A	A	C	C	G	A	T	C	T	C	T	T	G	T	A	G	A	T	C	G	T	T	C	T
866	Delta	>125169|1|265	G	G	T	T	T	A	T	A	C	C	T	T	C	C	C	A	G	G	T	A	A	C	A	A	A	C	C	G	A	T	C	T	C	T	T	G	T	A	G	A	T	C	G	T	T	C	T
867	Delta	>125168|1|265	G	G	T	T	T	A	T	A	C	C	T	T	C	C	C	A	G	G	T	A	A	C	A	A	A	C	C	G	A	T	C	T	C	T	T	G	T	A	G	A	T	C	G	T	T	C	T
868	Delta	>125167|1|265	G	G	T	T	T	A	T	A	C	C	T	T	C	C	C	A	G	G	T	A	A	C	A	A	A	C	C	G	A	T	C	T	C	T	T	G	T	A	G	A	T	C	G	T	T	C	T
869	Delta	>125166|1|265	G	G	T	T	T	A	T	A	C	C	T	T	C	C	C	A	G	G	T	A	A	C	A	A	A	C	C	G	A	T	C	T	C	T	T	G	T	A	G	A	T	C	G	T	T	C	T
870	Delta	>125165|1|265	G	G	T	T	T	A	T	A	C	C	T	T	C	C	C	A	G	G	T	A	A	C	A	A	A	C	C	G	A	T	C	T	C	T	T	G	T	A	G	A	T	C	G	T	T	C	T
871	Delta	>125164|1|265	G	G	T	T	T	A	T	A	C	C	T	T	C	C	C	A	G	G	T	A	A	C	A	A	A	C	C	G	A	T	C	T	C	T	T	G	T	A	G	A	T	C	G	T	T	C	T
872	Delta	>125163|1|265	G	G	T	T	T	A	T	A	C	C	T	T	C	C	C	A	G	G	T	A	A	C	A	A	A	C	C	G	A	T	C	T	C	T	T	G	T	A	G	A	T	C	G	T	T	C	T
873	Delta	>125162|1|265	G	G	T	T	T	A	T	A	C	C	T	T	C	C	C	A	G	G	T	A	A	C	A	A	A	C	C	G	A	T	C	T	C	T	T	G	T	A	G	A	T	C	G	T	T	C	T
874	Delta	>125161|1|265	G	G	T	T	T	A	T	A	C	C	T	T	C	C	C	A	G	G	T	A	A	C	A	A	A	C	C	G	A	T	C	T	C	T	T	G	T	A	G	A	T	C	G	T	T	C	T
875	Delta	>125160|1|265	G	G	T	T	T	A	T	A	C	C	T	T	C	C	C	A	G	G	T	A	A	C	A	A	A	C	C	G	A	T	C	T	C	T	T	G	T	A	G	A	T	C	G	T	T	C	T
876	Delta	>125159|1|265	G	G	T	T	T	A	T	A	C	C	T	T	C	C	C	A	G	G	T	A	A	C	A	A	A	C	C	G	A	T	C	T	C	T	T	G	T	A	G	A	T	C	G	T	T	C	T
877	Delta	>125158|1|265	G	G	T	T	T	A	T	A	C	C	T	T	C	C	C	A	G	G	T	A	A	C	A	A	A	C	C	G	A	T	C	T	C	T	T	G	T	A	G	A	T	C	G	T	T	C	T
878	Delta	>125157|1|265	G	G	T	T	T	A	T	A	C	C	T	T	C	C	C	A	G	G	T	A	A	C	A	A	A	C	C	G	A	T	C	T	C	T	T	G	T	A	G	A	T	C	G	T	T	C	T
879	Delta	>125156|1|265	G	G	T	T	T	A	T	A	C	C	T	T	C	C	C	A	G	G	T	A	A	C	A	A	A	C	C	G	A	T	C	T	C	T	T	G	T	A	G	A	T	C	G	T	T	C	T
880	Delta	>125155|1|265	G	G	T	T	T	A	T	A	C	C	T	T	C	C	C	A	G	G	T	A	A	C	A	A	A	C	C	G	A	T	C	T	C	T	T	G	T	A	G	A	T	C	G	T	T	C	T
881	Delta	>125154|1|265	G	G	T	T	T	A	T	A	C	C	T	T	C	C	C	A	G	G	T	A	A	C	A	A	A	C	C	G	A	T	C	T	C	T	T	G	T	A	G	A	T	C	G	T	T	C	T
882	Delta	>125153|1|265	G	G	T	T	T	A	T	A	C	C	T	T	C	C	C	A	G	G	T	A	A	C	A	A	A	C	C	G	A	T	C	T	C	T	T	G	T	A	G	A	T	C	G	T	T	C	T
883	Delta	>125152|1|265	G	G	T	T	T	A	T	A	C	C	T	T	C	C	C	A	G	G	T	A	A	C	A	A	A	C	C	G	A	T	C	T	C	T	T	G	T	A	G	A	T	C	G	T	T	C	T
884	Delta	>125151|1|265	G	G	T	T	T	A	T	A	C	C	T	T	C	C	C	A	G	G	T	A	A	C	A	A	A	C	C	G	A	T	C	T	C	T	T	G	T	A	G	A	T	C	G	T	T	C	T
885	Delta	>125150|1|265	G	G	T	T	T	A	T	A	C	C	T	T	C	C	C	A	G	G	T	A	A	C	A	A	A	C	C	G	A	T	C	T	C	T	T	G	T	A	G	A	T	C	G	T	T	C	T
886	Delta	>125147|1|265	G	G	T	T	T	A	T	A	C	C	T	T	C	C	C	A	G	G	T	A	A	C	A	A	A	C	C	G	A	T	C	T	C	T	T	G	T	A	G	A	T	C	G	T	T	C	T
887	Delta	>125146|1|265	G	G	T	T	T	A	T	A	C	C	T	T	C	C	C	A	G	G	T	A	A	C	A	A	A	C	C	G	A	T	C	T	C	T	T	G	T	A	G	A	T	C	G	T	T	C	T
888	Delta	>125144|1|265	G	G	T	T	T	A	T	A	C	C	T	T	C	C	C	A	G	G	T	A	A	C	A	A	A	C	C	G	A	T	C	T	C	T	T	G	T	A	G	A	T	C	G	T	T	C	T
889	Delta	>125143|1|265	G	G	T	T	T	A	T	A	C	C	T	T	C	C	C	A	G	G	T	A	A	C	A	A	A	C	C	G	A	T	C	T	C	T	T	G	T	A	G	A	T	C	G	T	T	C	T
890	Delta	>125142|1|265	G	G	T	T	T	A	T	A	C	C	T	T	C	C	C	A	G	G	T	A	A	C	A	A	A	C	C	G	A	T	C	T	C	T	T	G	T	A	G	A	T	C	G	T	T	C	T
891	Delta	>125141|1|265	G	G	T	T	T	A	T	A	C	C	T	T	C	C	C	A	G	G	T	A	A	C	A	A	A	C	C	G	A	T	C	T	C	T	T	G	T	A	G	A	T	C	G	T	T	C	T
892	Delta	>125139|1|265	G	G	T	T	T	A	T	A	C	C	T	T	C	C	C	A	G	G	T	A	A	C	A	A	A	C	C	G	A	T	C	T	C	T	T	G	T	A	G	A	T	C	G	T	T	C	T
893	Delta	>125138|1|265	G	G	T	T	T	A	T	A	C	C	T	T	C	C	C	A	G	G	T	A	A	C	A	A	A	C	C	G	A	T	C	T	C	T	T	G	T	A	G	A	T	C	G	T	T	C	T
894	Delta	>125137|1|265	G	G	T	T	T	A	T	A	C	C	T	T	C	C	C	A	G	G	T	A	A	C	A	A	A	C	C	G	A	T	C	T	C	T	T	G	T	A	G	A	T	C	G	T	T	C	T
895	Delta	>125136|1|265	G	G	T	T	T	A	T	A	C	C	T	T	C	C	C	A	G	G	T	A	A	C	A	A	A	C	C	G	A	T	C	T	C	T	T	G	T	A	G	A	T	C	G	T	T	C	T
896	Delta	>125135|1|265	G	G	T	T	T	A	T	A	C	C	T	T	C	C	C	A	G	G	T	A	A	C	A	A	A	C	C	G	A	T	C	T	C	T	T	G	T	A	G	A	T	C	G	T	T	C	T
897	Delta	>125134|1|265	G	G	T	T	T	A	T	A	C	C	T	T	C	C	C	A	G	G	T	A	A	C	A	A	A	C	C	G	A	T	C	T	C	T	T	G	T	A	G	A	T	C	G	T	T	C	T
898	Delta	>125133|1|265	G	G	T	T	T	A	T	A	C	C	T	T	C	C	C	A	G	G	T	A	A	C	A	A	A	C	C	G	A	T	C	T	C	T	T	G	T	A	G	A	T	C	G	T	T	C	T
899	Delta	>125132|1|265	G	G	T	T	T	A	T	A	C	C	T	T	C	C	C	A	G	G	T	A	A	C	A	A	A	C	C	G	A	T	C	T	C	T	T	G	T	A	G	A	T	C	G	T	T	C	T
900	Delta	>125131|1|265	G	G	T	T	T	A	T	A	C	C	T	T	C	C	C	A	G	G	T	A	A	C	A	A	A	C	C	G	A	T	C	T	C	T	T	G	T	A	G	A	T	C	G	T	T	C	T
901	Delta	>125130|1|265	G	G	T	T	T	A	T	A	C	C	T	T	C	C	C	A	G	G	T	A	A	C	A	A	A	C	C	G	A	T	C	T	C	T	T	G	T	A	G	A	T	C	G	T	T	C	T
902	Delta	>125129|1|265	G	G	T	T	T	A	T	A	C	C	T	T	C	C	C	A	G	G	T	A	A	C	A	A	A	C	C	G	A	T	C	T	C	T	T	G	T	A	G	A	T	C	G	T	T	C	T
903	Delta	>125128|1|265	G	G	T	T	T	A	T	A	C	C	T	T	C	C	C	A	G	G	T	A	A	C	A	A	A	C	C	G	A	T	C	T	C	T	T	G	T	A	G	A	T	C	G	T	T	C	T
904	Delta	>125127|1|265	G	G	T	T	T	A	T	A	C	C	T	T	C	C	C	A	G	G	T	A	A	C	A	A	A	C	C	G	A	T	C	T	C	T	T	G	T	A	G	A	T	C	G	T	T	C	T
905	Delta	>125126|1|265	G	G	T	T	T	A	T	A	C	C	T	T	C	C	C	A	G	G	T	A	A	C	A	A	A	C	C	G	A	T	C	T	C	T	T	G	T	A	G	A	T	C	G	T	T	C	T
906	Delta	>125125|1|265	G	G	T	T	T	A	T	A	C	C	T	T	C	C	C	A	G	G	T	A	A	C	A	A	A	C	C	G	A	T	C	T	C	T	T	G	T	A	G	A	T	C	G	T	T	C	T
907	Delta	>125124|1|265	G	G	T	T	T	A	T	A	C	C	T	T	C	C	C	A	G	G	T	A	A	C	A	A	A	C	C	G	A	T	C	T	C	T	T	G	T	A	G	A	T	C	G	T	T	C	T
908	Delta	>125123|1|265	G	G	T	T	T	A	T	A	C	C	T	T	C	C	C	A	G	G	T	A	A	C	A	A	A	C	C	G	A	T	C	T	C	T	T	G	T	A	G	A	T	C	G	T	T	C	T
909	Delta	>125121|1|265	G	G	T	T	T	A	T	A	C	C	T	T	C	C	C	A	G	G	T	A	A	C	A	A	A	C	C	G	A	T	C	T	C	T	T	G	T	A	G	A	T	C	G	T	T	C	T
910	Delta	>125120|1|265	G	G	T	T	T	A	T	A	C	C	T	T	C	C	C	A	G	G	T	A	A	C	A	A	A	C	C	G	A	T	C	T	C	T	T	G	T	A	G	A	T	C	G	T	T	C	T
911	Delta	>125119|1|265	G	G	T	T	T	A	T	A	C	C	T	T	C	C	C	A	G	G	T	A	A	C	A	A	A	C	C	G	A	T	C	T	C	T	T	G	T	A	G	A	T	C	G	T	T	C	T
912	Delta	>125116|1|265	G	G	T	T	T	A	T	A	C	C	T	T	C	C	C	A	G	G	T	A	A	C	A	A	A	C	C	G	A	T	C	T	C	T	T	G	T	A	G	A	T	C	G	T	T	C	T
913	Delta	>125115|1|265	G	G	T	T	T	A	T	A	C	C	T	T	C	C	C	A	G	G	T	A	A	C	A	A	A	C	C	G	A	T	C	T	C	T	T	G	T	A	G	A	T	C	G	T	T	C	T
914	Delta	>125114|1|265	G	G	T	T	T	A	T	A	C	C	T	T	C	C	C	A	G	G	T	A	A	C	A	A	A	C	C	G	A	T	C	T	C	T	T	G	T	A	G	A	T	C	G	T	T	C	T
915	Delta	>125113|1|265	G	G	T	T	T	A	T	A	C	C	T	T	C	C	C	A	G	G	T	A	A	C	A	A	A	C	C	G	A	T	C	T	C	T	T	G	T	A	G	A	T	C	G	T	T	C	T
916	Delta	>125112|1|265	G	G	T	T	T	A	T	A	C	C	T	T	C	C	C	A	G	G	T	A	A	C	A	A	A	C	C	G	A	T	C	T	C	T	T	G	T	A	G	A	T	C	G	T	T	C	T
917	Delta	>125111|1|265	G	G	T	T	T	A	T	A	C	C	T	T	C	C	C	A	G	G	T	A	A	C	A	A	A	C	C	G	A	T	C	T	C	T	T	G	T	A	G	A	T	C	G	T	T	C	T
918	Delta	>125109|1|265	G	G	T	T	T	A	T	A	C	C	T	T	C	C	C	A	G	G	T	A	A	C	A	A	A	C	C	G	A	T	C	T	C	T	T	G	T	A	G	A	T	C	G	T	T	C	T
919	Delta	>125108|1|265	G	G	T	T	T	A	T	A	C	C	T	T	C	C	C	A	G	G	T	A	A	C	A	A	A	C	C	G	A	T	C	T	C	T	T	G	T	A	G	A	T	C	G	T	T	C	T
920	Delta	>125107|1|265	G	G	T	T	T	A	T	A	C	C	T	T	C	C	C	A	G	G	T	A	A	C	A	A	A	C	C	G	A	T	C	T	C	T	T	G	T	A	G	A	T	C	G	T	T	C	T
921	Delta	>125106|1|265	G	G	T	T	T	A	T	A	C	C	T	T	C	C	C	A	G	G	T	A	A	C	A	A	A	C	C	G	A	T	C	T	C	T	T	G	T	A	G	A	T	C	G	T	T	C	T
922	Delta	>125103|1|265	G	G	T	T	T	A	T	A	C	C	T	T	C	C	C	A	G	G	T	A	A	C	A	A	A	C	C	G	A	T	C	T	C	T	T	G	T	A	G	A	T	C	G	T	T	C	T
923	Delta	>125102|1|265	G	G	T	T	T	A	T	A	C	C	T	T	C	C	C	A	G	G	T	A	A	C	A	A	A	C	C	G	A	T	C	T	C	T	T	G	T	A	G	A	T	C	G	T	T	C	T
924	Delta	>125101|1|265	G	G	T	T	T	A	T	A	C	C	T	T	C	C	C	A	G	G	T	A	A	C	A	A	A	C	C	G	A	T	C	T	C	T	T	G	T	A	G	A	T	C	G	T	T	C	T
925	Delta	>125099|1|265	G	G	T	T	T	A	T	A	C	C	T	T	C	C	C	A	G	G	T	A	A	C	A	A	A	C	C	G	A	T	C	T	C	T	T	G	T	A	G	A	T	C	G	T	T	C	T
926	Delta	>125098|1|265	G	G	T	T	T	A	T	A	C	C	T	T	C	C	C	A	G	G	T	A	A	C	A	A	A	C	C	G	A	T	C	T	C	T	T	G	T	A	G	A	T	C	G	T	T	C	T
927	Delta	>125097|1|265	G	G	T	T	T	A	T	A	C	C	T	T	C	C	C	A	G	G	T	A	A	C	A	A	A	C	C	G	A	T	C	T	C	T	T	G	T	A	G	A	T	C	G	T	T	C	T
928	Delta	>125096|1|265	G	G	T	T	T	A	T	A	C	C	T	T	C	C	C	A	G	G	T	A	A	C	A	A	A	C	C	G	A	T	C	T	C	T	T	G	T	A	G	A	T	C	G	T	T	C	T
929	Delta	>125095|1|265	G	G	T	T	T	A	T	A	C	C	T	T	C	C	C	A	G	G	T	A	A	C	A	A	A	C	C	G	A	T	C	T	C	T	T	G	T	A	G	A	T	C	G	T	T	C	T
930	Delta	>125094|1|265	G	G	T	T	T	A	T	A	C	C	T	T	C	C	C	A	G	G	T	A	A	C	A	A	A	C	C	G	A	T	C	T	C	T	T	G	T	A	G	A	T	C	G	T	T	C	T
931	Delta	>125092|1|265	G	G	T	T	T	A	T	A	C	C	T	T	C	C	C	A	G	G	T	A	A	C	A	A	A	C	C	G	A	T	C	T	C	T	T	G	T	A	G	A	T	C	G	T	T	C	T
932	Delta	>125091|1|265	G	G	T	T	T	A	T	A	C	C	T	T	C	C	C	A	G	G	T	A	A	C	A	A	A	C	C	G	A	T	C	T	C	T	T	G	T	A	G	A	T	C	G	T	T	C	T
933	Delta	>125090|1|265	G	G	T	T	T	A	T	A	C	C	T	T	C	C	C	A	G	G	T	A	A	C	A	A	A	C	C	G	A	T	C	T	C	T	T	G	T	A	G	A	T	C	G	T	T	C	T
934	Delta	>125089|1|265	G	G	T	T	T	A	T	A	C	C	T	T	C	C	C	A	G	G	T	A	A	C	A	A	A	C	C	G	A	T	C	T	C	T	T	G	T	A	G	A	T	C	G	T	T	C	T
935	Delta	>125088|1|265	G	G	T	T	T	A	T	A	C	C	T	T	C	C	C	A	G	G	T	A	A	C	A	A	A	C	C	G	A	T	C	T	C	T	T	G	T	A	G	A	T	C	G	T	T	C	T
936	Delta	>125087|1|265	G	G	T	T	T	A	T	A	C	C	T	T	C	C	C	A	G	G	T	A	A	C	A	A	A	C	C	G	A	T	C	T	C	T	T	G	T	A	G	A	T	C	G	T	T	C	T
937	Delta	>125086|1|265	G	G	T	T	T	A	T	A	C	C	T	T	C	C	C	A	G	G	T	A	A	C	A	A	A	C	C	G	A	T	C	T	C	T	T	G	T	A	G	A	T	C	G	T	T	C	T
938	Delta	>125083|1|265	G	G	T	T	T	A	T	A	C	C	T	T	C	C	C	A	G	G	T	A	A	C	A	A	A	C	C	G	A	T	C	T	C	T	T	G	T	A	G	A	T	C	G	T	T	C	T
939	Delta	>125082|1|265	G	G	T	T	T	A	T	A	C	C	T	T	C	C	C	A	G	G	T	A	A	C	A	A	A	C	C	G	A	T	C	T	C	T	T	G	T	A	G	A	T	C	G	T	T	C	T
940	Delta	>125081|1|265	G	G	T	T	T	A	T	A	C	C	T	T	C	C	C	A	G	G	T	A	A	C	A	A	A	C	C	G	A	T	C	T	C	T	T	G	T	A	G	A	T	C	G	T	T	C	T
941	Delta	>125080|1|265	G	G	T	T	T	A	T	A	C	C	T	T	C	C	C	A	G	G	T	A	A	C	A	A	A	C	C	G	A	T	C	T	C	T	T	G	T	A	G	A	T	C	G	T	T	C	T
942	Delta	>125079|1|265	G	G	T	T	T	A	T	A	C	C	T	T	C	C	C	A	G	G	T	A	A	C	A	A	A	C	C	G	A	T	C	T	C	T	T	G	T	A	G	A	T	C	G	T	T	C	T
943	Delta	>125078|1|265	G	G	T	T	T	A	T	A	C	C	T	T	C	C	C	A	G	G	T	A	A	C	A	A	A	C	C	G	A	T	C	T	C	T	T	G	T	A	G	A	T	C	G	T	T	C	T
944	Delta	>125077|1|265	G	G	T	T	T	A	T	A	C	C	T	T	C	C	C	A	G	G	T	A	A	C	A	A	A	C	C	G	A	T	C	T	C	T	T	G	T	A	G	A	T	C	G	T	T	C	T
945	Delta	>125076|1|265	G	G	T	T	T	A	T	A	C	C	T	T	C	C	C	A	G	G	T	A	A	C	A	A	A	C	C	G	A	T	C	T	C	T	T	G	T	A	G	A	T	C	G	T	T	C	T
946	Delta	>125075|1|265	G	G	T	T	T	A	T	A	C	C	T	T	C	C	C	A	G	G	T	A	A	C	A	A	A	C	C	G	A	T	C	T	C	T	T	G	T	A	G	A	T	C	G	T	T	C	T
947	Delta	>125073|1|265	G	G	T	T	T	A	T	A	C	C	T	T	C	C	C	A	G	G	T	A	A	C	A	A	A	C	C	G	A	T	C	T	C	T	T	G	T	A	G	A	T	C	G	T	T	C	T
948	Delta	>125072|1|265	G	G	T	T	T	A	T	A	C	C	T	T	C	C	C	A	G	G	T	A	A	C	A	A	A	C	C	G	A	T	C	T	C	T	T	G	T	A	G	A	T	C	G	T	T	C	T
949	Delta	>125070|1|265	G	G	T	T	T	A	T	A	C	C	T	T	C	C	C	A	G	G	T	A	A	C	A	A	A	C	C	G	A	T	C	T	C	T	T	G	T	A	G	A	T	C	G	T	T	C	T
950	Delta	>125069|1|265	G	G	T	T	T	A	T	A	C	C	T	T	C	C	C	A	G	G	T	A	A	C	A	A	A	C	C	G	A	T	C	T	C	T	T	G	T	A	G	A	T	C	G	T	T	C	T
951	Delta	>125068|1|265	G	G	T	T	T	A	T	A	C	C	T	T	C	C	C	A	G	G	T	A	A	C	A	A	A	C	C	G	A	T	C	T	C	T	T	G	T	A	G	A	T	C	G	T	T	C	T
952	Delta	>125067|1|265	G	G	T	T	T	A	T	A	C	C	T	T	C	C	C	A	G	G	T	A	A	C	A	A	A	C	C	G	A	T	C	T	C	T	T	G	T	A	G	A	T	C	G	T	T	C	T
953	Delta	>125066|1|265	G	G	T	T	T	A	T	A	C	C	T	T	C	C	C	A	G	G	T	A	A	C	A	A	A	C	C	G	A	T	C	T	C	T	T	G	T	A	G	A	T	C	G	T	T	C	T
954	Delta	>125065|1|265	G	G	T	T	T	A	T	A	C	C	T	T	C	C	C	A	G	G	T	A	A	C	A	A	A	C	C	G	A	T	C	T	C	T	T	G	T	A	G	A	T	C	G	T	T	C	T
955	Delta	>125064|1|265	G	G	T	T	T	A	T	A	C	C	T	T	C	C	C	A	G	G	T	A	A	C	A	A	A	C	C	G	A	T	C	T	C	T	T	G	T	A	G	A	T	C	G	T	T	C	T
956	Delta	>125063|1|265	G	G	T	T	T	A	T	A	C	C	T	T	C	C	C	A	G	G	T	A	A	C	A	A	A	C	C	G	A	T	C	T	C	T	T	G	T	A	G	A	T	C	G	T	T	C	T
957	Delta	>125062|1|265	G	G	T	T	T	A	T	A	C	C	T	T	C	C	C	A	G	G	T	A	A	C	A	A	A	C	C	G	A	T	C	T	C	T	T	G	T	A	G	A	T	C	G	T	T	C	T
958	Delta	>125061|1|265	G	G	T	T	T	A	T	A	C	C	T	T	C	C	C	A	G	G	T	A	A	C	A	A	A	C	C	G	A	T	C	T	C	T	T	G	T	A	G	A	T	C	G	T	T	C	T
959	Delta	>125060|1|265	G	G	T	T	T	A	T	A	C	C	T	T	C	C	C	A	G	G	T	A	A	C	A	A	A	C	C	G	A	T	C	T	C	T	T	G	T	A	G	A	T	C	G	T	T	C	T
960	Delta	>125059|1|265	G	G	T	T	T	A	T	A	C	C	T	T	C	C	C	A	G	G	T	A	A	C	A	A	A	C	C	G	A	T	C	T	C	T	T	G	T	A	G	A	T	C	G	T	T	C	T
961	Delta	>125058|1|265	G	G	T	T	T	A	T	A	C	C	T	T	C	C	C	A	G	G	T	A	A	C	A	A	A	C	C	G	A	T	C	T	C	T	T	G	T	A	G	A	T	C	G	T	T	C	T
962	Delta	>125057|1|265	G	G	T	T	T	A	T	A	C	C	T	T	C	C	C	A	G	G	T	A	A	C	A	A	A	C	C	G	A	T	C	T	C	T	T	G	T	A	G	A	T	C	G	T	T	C	T
963	Delta	>125056|1|265	G	G	T	T	T	A	T	A	C	C	T	T	C	C	C	A	G	G	T	A	A	C	A	A	A	C	C	G	A	T	C	T	C	T	T	G	T	A	G	A	T	C	G	T	T	C	T
964	Delta	>125055|1|265	G	G	T	T	T	A	T	A	C	C	T	T	C	C	C	A	G	G	T	A	A	C	A	A	A	C	C	G	A	T	C	T	C	T	T	G	T	A	G	A	T	C	G	T	T	C	T
965	Delta	>125054|1|265	G	G	T	T	T	A	T	A	C	C	T	T	C	C	C	A	G	G	T	A	A	C	A	A	A	C	C	G	A	T	C	T	C	T	T	G	T	A	G	A	T	C	G	T	T	C	T
966	Delta	>125053|1|265	G	G	T	T	T	A	T	A	C	C	T	T	C	C	C	A	G	G	T	A	A	C	A	A	A	C	C	G	A	T	C	T	C	T	T	G	T	A	G	A	T	C	G	T	T	C	T
967	Delta	>125052|1|265	G	G	T	T	T	A	T	A	C	C	T	T	C	C	C	A	G	G	T	A	A	C	A	A	A	C	C	G	A	T	C	T	C	T	T	G	T	A	G	A	T	C	G	T	T	C	T
968	Delta	>125051|1|265	G	G	T	T	T	A	T	A	C	C	T	T	C	C	C	A	G	G	T	A	A	C	A	A	A	C	C	G	A	T	C	T	C	T	T	G	T	A	G	A	T	C	G	T	T	C	T
969	Delta	>125050|1|265	G	G	T	T	T	A	T	A	C	C	T	T	C	C	C	A	G	G	T	A	A	C	A	A	A	C	C	G	A	T	C	T	C	T	T	G	T	A	G	A	T	C	G	T	T	C	T
970	Delta	>125049|1|265	G	G	T	T	T	A	T	A	C	C	T	T	C	C	C	A	G	G	T	A	A	C	A	A	A	C	C	G	A	T	C	T	C	T	T	G	T	A	G	A	T	C	G	T	T	C	T
971	Delta	>125048|1|265	G	G	T	T	T	A	T	A	C	C	T	T	C	C	C	A	G	G	T	A	A	C	A	A	A	C	C	G	A	T	C	T	C	T	T	G	T	A	G	A	T	C	G	T	T	C	T
972	Delta	>125047|1|265	G	G	T	T	T	A	T	A	C	C	T	T	C	C	C	A	G	G	T	A	A	C	A	A	A	C	C	G	A	T	C	T	C	T	T	G	T	A	G	A	T	C	G	T	T	C	T
973	Delta	>125045|1|265	G	G	T	T	T	A	T	A	C	C	T	T	C	C	C	A	G	G	T	A	A	C	A	A	A	C	C	G	A	T	C	T	C	T	T	G	T	A	G	A	T	C	G	T	T	C	T
974	Delta	>125044|1|265	G	G	T	T	T	A	T	A	C	C	T	T	C	C	C	A	G	G	T	A	A	C	A	A	A	C	C	G	A	T	C	T	C	T	T	G	T	A	G	A	T	C	G	T	T	C	T
975	Delta	>125043|1|265	G	G	T	T	T	A	T	A	C	C	T	T	C	C	C	A	G	G	T	A	A	C	A	A	A	C	C	G	A	T	C	T	C	T	T	G	T	A	G	A	T	C	G	T	T	C	T
976	Delta	>125042|1|265	G	G	T	T	T	A	T	A	C	C	T	T	C	C	C	A	G	G	T	A	A	C	A	A	A	C	C	G	A	T	C	T	C	T	T	G	T	A	G	A	T	C	G	T	T	C	T
977	Delta	>125041|1|265	G	G	T	T	T	A	T	A	C	C	T	T	C	C	C	A	G	G	T	A	A	C	A	A	A	C	C	G	A	T	C	T	C	T	T	G	T	A	G	A	T	C	G	T	T	C	T
978	Delta	>125040|1|265	G	G	T	T	T	A	T	A	C	C	T	T	C	C	C	A	G	G	T	A	A	C	A	A	A	C	C	G	A	T	C	T	C	T	T	G	T	A	G	A	T	C	G	T	T	C	T
979	Delta	>125039|1|265	G	G	T	T	T	A	T	A	C	C	T	T	C	C	C	A	G	G	T	A	A	C	A	A	A	C	C	G	A	T	C	T	C	T	T	G	T	A	G	A	T	C	G	T	T	C	T
980	Delta	>125038|1|265	G	G	T	T	T	A	T	A	C	C	T	T	C	C	C	A	G	G	T	A	A	C	A	A	A	C	C	G	A	T	C	T	C	T	T	G	T	A	G	A	T	C	G	T	T	C	T
981	Delta	>125037|1|265	G	G	T	T	T	A	T	A	C	C	T	T	C	C	C	A	G	G	T	A	A	C	A	A	A	C	C	G	A	T	C	T	C	T	T	G	T	A	G	A	T	C	G	T	T	C	T
982	Delta	>125036|1|265	G	G	T	T	T	A	T	A	C	C	T	T	C	C	C	A	G	G	T	A	A	C	A	A	A	C	C	G	A	T	C	T	C	T	T	G	T	A	G	A	T	C	G	T	T	C	T
983	Delta	>125035|1|265	G	G	T	T	T	A	T	A	C	C	T	T	C	C	C	A	G	G	T	A	A	C	A	A	A	C	C	G	A	T	C	T	C	T	T	G	T	A	G	A	T	C	G	T	T	C	T
984	Delta	>125034|1|265	G	G	T	T	T	A	T	A	C	C	T	T	C	C	C	A	G	G	T	A	A	C	A	A	A	C	C	G	A	T	C	T	C	T	T	G	T	A	G	A	T	C	G	T	T	C	T
985	Delta	>125033|1|265	G	G	T	T	T	A	T	A	C	C	T	T	C	C	C	A	G	G	T	A	A	C	A	A	A	C	C	G	A	T	C	T	C	T	T	G	T	A	G	A	T	C	G	T	T	C	T
986	Delta	>125032|1|265	G	G	T	T	T	A	T	A	C	C	T	T	C	C	C	A	G	G	T	A	A	C	A	A	A	C	C	G	A	T	C	T	C	T	T	G	T	A	G	A	T	C	G	T	T	C	T
987	Delta	>125031|1|265	G	G	T	T	T	A	T	A	C	C	T	T	C	C	C	A	G	G	T	A	A	C	A	A	A	C	C	G	A	T	C	T	C	T	T	G	T	A	G	A	T	C	G	T	T	C	T
988	Delta	>125030|1|265	G	G	T	T	T	A	T	A	C	C	T	T	C	C	C	A	G	G	T	A	A	C	A	A	A	C	C	G	A	T	C	T	C	T	T	G	T	A	G	A	T	C	G	T	T	C	T
989	Delta	>125014|1|265	G	G	T	T	T	A	T	A	C	C	T	T	C	C	C	A	G	G	T	A	A	C	A	A	A	C	C	G	A	T	C	T	C	T	T	G	T	A	G	A	T	C	G	T	T	C	T
990	Delta	>124994|1|265	G	G	T	T	T	A	T	A	C	C	T	T	C	C	C	A	G	G	T	A	A	C	A	A	A	C	C	G	A	T	C	T	C	T	T	G	T	A	G	A	T	C	G	T	T	C	T
991	Delta	>124990|1|265	G	G	T	T	T	A	T	A	C	C	T	T	C	C	C	A	G	G	T	A	A	C	A	A	A	C	C	G	A	T	C	T	C	T	T	G	T	A	G	A	T	C	G	T	T	C	T
992	Delta	>124989|1|265	G	G	T	T	T	A	T	A	C	C	T	T	C	C	C	A	G	G	T	A	A	C	A	A	A	C	C	G	A	T	C	T	C	T	T	G	T	A	G	A	T	C	G	T	T	C	T
993	Delta	>124876|1|265	G	G	T	T	T	A	T	A	C	C	T	T	C	C	C	A	G	G	T	A	A	C	A	A	A	C	C	G	A	T	C	T	C	T	T	G	T	A	G	A	T	C	G	T	T	C	T
994	Delta	>124873|1|265	G	G	T	T	T	A	T	A	C	C	T	T	C	C	C	A	G	G	T	A	A	C	A	A	A	C	C	G	A	T	C	T	C	T	T	G	T	A	G	A	T	C	G	T	T	C	T
995	Delta	>124872|1|265	G	G	T	T	T	A	T	A	C	C	T	T	C	C	C	A	G	G	T	A	A	C	A	A	A	C	C	G	A	T	C	T	C	T	T	G	T	A	G	A	T	C	G	T	T	C	T
996	Delta	>124871|1|265	G	G	T	T	T	A	T	A	C	C	T	T	C	C	C	A	G	G	T	A	A	C	A	A	A	C	C	G	A	T	C	T	C	T	T	G	T	A	G	A	T	C	G	T	T	C	T
997	Delta	>124870|1|265	G	G	T	T	T	A	T	A	C	C	T	T	C	C	C	A	G	G	T	A	A	C	A	A	A	C	C	G	A	T	C	T	C	T	T	G	T	A	G	A	T	C	G	T	T	C	T
998	Delta	>124869|1|265	G	G	T	T	T	A	T	A	C	C	T	T	C	C	C	A	G	G	T	A	A	C	A	A	A	C	C	G	A	T	C	T	C	T	T	G	T	A	G	A	T	C	G	T	T	C	T
999	Delta	>124867|1|265	G	G	T	T	T	A	T	A	C	C	T	T	C	C	C	A	G	G	T	A	A	C	A	A	A	C	C	G	A	T	C	T	C	T	T	G	T	A	G	A	T	C	G	T	T	C	T
1000	Delta	>124866|1|265	G	G	T	T	T	A	T	A	C	C	T	T	C	C	C	A	G	G	T	A	A	C	A	A	A	C	C	G	A	T	C	T	C	T	T	G	T	A	G	A	T	C	G	T	T	C	T
1001	Delta	>124864|1|265	G	G	T	T	T	A	T	A	C	C	T	T	C	C	C	A	G	G	T	A	A	C	A	A	A	C	C	G	A	T	C	T	C	T	T	G	T	A	G	A	T	C	G	T	T	C	T
1002	Delta	>124862|1|265	G	G	T	T	T	A	T	A	C	C	T	T	C	C	C	A	G	G	T	A	A	C	A	A	A	C	C	G	A	T	C	T	C	T	T	G	T	A	G	A	T	C	G	T	T	C	T
1003	Delta	>124859|1|265	G	G	T	T	T	A	T	A	C	C	T	T	C	C	C	A	G	G	T	A	A	C	A	A	A	C	C	G	A	T	C	T	C	T	T	G	T	A	G	A	T	C	G	T	T	C	T
1004	Delta	>124858|1|265	G	G	T	T	T	A	T	A	C	C	T	T	C	C	C	A	G	G	T	A	A	C	A	A	A	C	C	G	A	T	C	T	C	T	T	G	T	A	G	A	T	C	G	T	T	C	T
1005	Delta	>124856|1|265	G	G	T	T	T	A	T	A	C	C	T	T	C	C	C	A	G	G	T	A	A	C	A	A	A	C	C	G	A	T	C	T	C	T	T	G	T	A	G	A	T	C	G	T	T	C	T
1006	Delta	>124855|1|265	G	G	T	T	T	A	T	A	C	C	T	T	C	C	C	A	G	G	T	A	A	C	A	A	A	C	C	G	A	T	C	T	C	T	T	G	T	A	G	A	T	C	G	T	T	C	T
1007	Delta	>124852|1|265	G	G	T	T	T	A	T	A	C	C	T	T	C	C	C	A	G	G	T	A	A	C	A	A	A	C	C	G	A	T	C	T	C	T	T	G	T	A	G	A	T	C	G	T	T	C	T
1008	Delta	>124841|1|265	G	G	T	T	T	A	T	A	C	C	T	T	C	C	C	A	G	G	T	A	A	C	A	A	A	C	C	G	A	T	C	T	C	T	T	G	T	A	G	A	T	C	G	T	T	C	T
1009	Delta	>124831|1|265	G	G	T	T	T	A	T	A	C	C	T	T	C	C	C	A	G	G	T	A	A	C	A	A	A	C	C	G	A	T	C	T	C	T	T	G	T	A	G	A	T	C	G	T	T	C	T
1010	Delta	>124781|1|265	G	G	T	T	T	A	T	A	C	C	T	T	C	C	C	A	G	G	T	A	A	C	A	A	A	C	C	G	A	T	C	T	C	T	T	G	T	A	G	A	T	C	G	T	T	C	T
1011	Delta	>124777|1|265	G	G	T	T	T	A	T	A	C	C	T	T	C	C	C	A	G	G	T	A	A	C	A	A	A	C	C	G	A	T	C	T	C	T	T	G	T	A	G	A	T	C	G	T	T	C	T
1012	Delta	>124771|1|265	G	G	T	T	T	A	T	A	C	C	T	T	C	C	C	A	G	G	T	A	A	C	A	A	A	C	C	G	A	T	C	T	C	T	T	G	T	A	G	A	T	C	G	T	T	C	T
1013	Delta	>124767|1|265	G	G	T	T	T	A	T	A	C	C	T	T	C	C	C	A	G	G	T	A	A	C	A	A	A	C	C	G	A	T	C	T	C	T	T	G	T	A	G	A	T	C	G	T	T	C	T
1014	Delta	>124761|1|265	G	G	T	T	T	A	T	A	C	C	T	T	C	C	C	A	G	G	T	A	A	C	A	A	A	C	C	G	A	T	C	T	C	T	T	G	T	A	G	A	T	C	G	T	T	C	T
1015	Delta	>124200|1|265	G	G	T	T	T	A	T	A	C	C	T	T	C	C	C	A	G	G	T	A	A	C	A	A	A	C	C	G	A	T	C	T	C	T	T	G	T	A	G	A	T	C	G	T	T	C	T
1016	Delta	>124151|1|265	G	G	T	T	T	A	T	A	C	C	T	T	C	C	C	A	G	G	T	A	A	C	A	A	A	C	C	G	A	T	C	T	C	T	T	G	T	A	G	A	T	C	G	T	T	C	T
1017	Delta	>124135|1|265	G	G	T	T	T	A	T	A	C	C	T	T	C	C	C	A	G	G	T	A	A	C	A	A	A	C	C	G	A	T	C	T	C	T	T	G	T	A	G	A	T	C	G	T	T	C	T
1018	Delta	>123916|1|265	G	G	T	T	T	A	T	A	C	C	T	T	C	C	C	A	G	G	T	A	A	C	A	A	A	C	C	G	A	T	C	T	C	T	T	G	T	A	G	A	T	C	G	T	T	C	T
1019	Delta	>123914|1|265	G	G	T	T	T	A	T	A	C	C	T	T	C	C	C	A	G	G	T	A	A	C	A	A	A	C	C	G	A	T	C	T	C	T	T	G	T	A	G	A	T	C	G	T	T	C	T
1020	Delta	>123913|1|265	G	G	T	T	T	A	T	A	C	C	T	T	C	C	C	A	G	G	T	A	A	C	A	A	A	C	C	G	A	T	C	T	C	T	T	G	T	A	G	A	T	C	G	T	T	C	T
1021	Delta	>123912|1|265	G	G	T	T	T	A	T	A	C	C	T	T	C	C	C	A	G	G	T	A	A	C	A	A	A	C	C	G	A	T	C	T	C	T	T	G	T	A	G	A	T	C	G	T	T	C	T
1022	Delta	>123911|1|265	G	G	T	T	T	A	T	A	C	C	T	T	C	C	C	A	G	G	T	A	A	C	A	A	A	C	C	G	A	T	C	T	C	T	T	G	T	A	G	A	T	C	G	T	T	C	T
1023	Delta	>123838|1|265	G	G	T	T	T	A	T	A	C	C	T	T	C	C	C	A	G	G	T	A	A	C	A	A	A	C	C	G	A	T	C	T	C	T	T	G	T	A	G	A	T	C	G	T	T	C	T
1024	Delta	>123505|1|265	G	G	T	T	T	A	T	A	C	C	T	T	C	C	C	A	G	G	T	A	A	C	A	A	A	C	C	G	A	T	C	T	C	T	T	G	T	A	G	A	T	C	G	T	T	C	T
1025	Delta	>123504|1|265	G	G	T	T	T	A	T	A	C	C	T	T	C	C	C	A	G	G	T	A	A	C	A	A	A	C	C	G	A	T	C	T	C	T	T	G	T	A	G	A	T	C	G	T	T	C	T
1026	Delta	>123503|1|265	G	G	T	T	T	A	T	A	C	C	T	T	C	C	C	A	G	G	T	A	A	C	A	A	A	C	C	G	A	T	C	T	C	T	T	G	T	A	G	A	T	C	G	T	T	C	T
1027	Delta	>122955|1|265	G	G	T	T	T	A	T	A	C	C	T	T	C	C	C	A	G	G	T	A	A	C	A	A	A	C	C	G	A	T	C	T	C	T	T	G	T	A	G	A	T	C	G	T	T	C	T
1028	Delta	>122929|1|265	G	G	T	T	T	A	T	A	C	C	T	T	C	C	C	A	G	G	T	A	A	C	A	A	A	C	C	G	A	T	C	T	C	T	T	G	T	A	G	A	T	C	G	T	T	C	T
1029	Delta	>122928|1|265	G	G	T	T	T	A	T	A	C	C	T	T	C	C	C	A	G	G	T	A	A	C	A	A	A	C	C	G	A	T	C	T	C	T	T	G	T	A	G	A	T	C	G	T	T	C	T
1030	Delta	>122927|1|265	G	G	T	T	T	A	T	A	C	C	T	T	C	C	C	A	G	G	T	A	A	C	A	A	A	C	C	G	A	T	C	T	C	T	T	G	T	A	G	A	T	C	G	T	T	C	T
1031	Delta	>121462|1|265	G	G	T	T	T	A	T	A	C	C	T	T	C	C	C	A	G	G	T	A	A	C	A	A	A	C	C	G	A	T	C	T	C	T	T	G	T	A	G	A	T	C	G	T	T	C	T
1032	Delta	>120621|1|265	G	G	T	T	T	A	T	A	C	C	T	T	C	C	C	A	G	G	T	A	A	C	A	A	A	C	C	G	A	T	C	T	C	T	T	G	T	A	G	A	T	C	G	T	T	C	T
1033	Delta	>120064|1|265	G	G	T	T	T	A	T	A	C	C	T	T	C	C	C	A	G	G	T	A	A	C	A	A	A	C	C	G	A	T	C	T	C	T	T	G	T	A	G	A	T	C	G	T	T	C	T
1034	Delta	>119550|1|265	G	G	T	T	T	A	T	A	C	C	T	T	C	C	C	A	G	G	T	A	A	C	A	A	A	C	C	G	A	T	C	T	C	T	T	G	T	A	G	A	T	C	G	T	T	C	T
1035	Delta	>119539|1|265	G	G	T	T	T	A	T	A	C	C	T	T	C	C	C	A	G	G	T	A	A	C	A	A	A	C	C	G	A	T	C	T	C	T	T	G	T	A	G	A	T	C	G	T	T	C	T
1036	Delta	>119308|1|265	G	G	T	T	T	A	T	A	C	C	T	T	C	C	C	A	G	G	T	A	A	C	A	A	A	C	C	G	A	T	C	T	C	T	T	G	T	A	G	A	T	C	G	T	T	C	T
1037	Delta	>119149|1|265	G	G	T	T	T	A	T	A	C	C	T	T	C	C	C	A	G	G	T	A	A	C	A	A	A	C	C	G	A	T	C	T	C	T	T	G	T	A	G	A	T	C	G	T	T	C	T
1038	Delta	>118331|1|265	G	G	T	T	T	A	T	A	C	C	T	T	C	C	C	A	G	G	T	A	A	C	A	A	A	C	C	G	A	T	C	T	C	T	T	G	T	A	G	A	T	C	G	T	T	C	T
1039	Delta	>118104|1|265	G	G	T	T	T	A	T	A	C	C	T	T	C	C	C	A	G	G	T	A	A	C	A	A	A	C	C	G	A	T	C	T	C	T	T	G	T	A	G	A	T	C	G	T	T	C	T
1040	Delta	>117564|1|265	G	G	T	T	T	A	T	A	C	C	T	T	C	C	C	A	G	G	T	A	A	C	A	A	A	C	C	G	A	T	C	T	C	T	T	G	T	A	G	A	T	C	G	T	T	C	T
1041	Delta	>117422|1|265	G	G	T	T	T	A	T	A	C	C	T	T	C	C	C	A	G	G	T	A	A	C	A	A	A	C	C	G	A	T	C	T	C	T	T	G	T	A	G	A	T	C	G	T	T	C	T
1042	Delta	>117349|1|265	G	G	T	T	T	A	T	A	C	C	T	T	C	C	C	A	G	G	T	A	A	C	A	A	A	C	C	G	A	T	C	T	C	T	T	G	T	A	G	A	T	C	G	T	T	C	T
1043	Delta	>117348|1|265	G	G	T	T	T	A	T	A	C	C	T	T	C	C	C	A	G	G	T	A	A	C	A	A	A	C	C	G	A	T	C	T	C	T	T	G	T	A	G	A	T	C	G	T	T	C	T
1044	Delta	>117347|1|265	G	G	T	T	T	A	T	A	C	C	T	T	C	C	C	A	G	G	T	A	A	C	A	A	A	C	C	G	A	T	C	T	C	T	T	G	T	A	G	A	T	C	G	T	T	C	T
1045	Delta	>117346|1|265	G	G	T	T	T	A	T	A	C	C	T	T	C	C	C	A	G	G	T	A	A	C	A	A	A	C	C	G	A	T	C	T	C	T	T	G	T	A	G	A	T	C	G	T	T	C	T
1046	Delta	>117213|1|265	G	G	T	T	T	A	T	A	C	C	T	T	C	C	C	A	G	G	T	A	A	C	A	A	A	C	C	G	A	T	C	T	C	T	T	G	T	A	G	A	T	C	G	T	T	C	T
1047	Delta	>117211|1|265	G	G	T	T	T	A	T	A	C	C	T	T	C	C	C	A	G	G	T	A	A	C	A	A	A	C	C	G	A	T	C	T	C	T	T	G	T	A	G	A	T	C	G	T	T	C	T
1048	Delta	>117210|1|265	G	G	T	T	T	A	T	A	C	C	T	T	C	C	C	A	G	G	T	A	A	C	A	A	A	C	C	G	A	T	C	T	C	T	T	G	T	A	G	A	T	C	G	T	T	C	T
1049	Delta	>117209|1|265	G	G	T	T	T	A	T	A	C	C	T	T	C	C	C	A	G	G	T	A	A	C	A	A	A	C	C	G	A	T	C	T	C	T	T	G	T	A	G	A	T	C	G	T	T	C	T
1050	Delta	>117208|1|265	G	G	T	T	T	A	T	A	C	C	T	T	C	C	C	A	G	G	T	A	A	C	A	A	A	C	C	G	A	T	C	T	C	T	T	G	T	A	G	A	T	C	G	T	T	C	T
1051	Delta	>117077|1|265	G	G	T	T	T	A	T	A	C	C	T	T	C	C	C	A	G	G	T	A	A	C	A	A	A	C	C	G	A	T	C	T	C	T	T	G	T	A	G	A	T	C	G	T	T	C	T
1052	Delta	>116675|1|265	G	G	T	T	T	A	T	A	C	C	T	T	C	C	C	A	G	G	T	A	A	C	A	A	A	C	C	G	A	T	C	T	C	T	T	G	T	A	G	A	T	C	G	T	T	C	T
1053	Delta	>116387|1|265	G	G	T	T	T	A	T	A	C	C	T	T	C	C	C	A	G	G	T	A	A	C	A	A	A	C	C	G	A	T	C	T	C	T	T	G	T	A	G	A	T	C	G	T	T	C	T
1054	Delta	>116179|1|265	G	G	T	T	T	A	T	A	C	C	T	T	C	C	C	A	G	G	T	A	A	C	A	A	A	C	C	G	A	T	C	T	C	T	T	G	T	A	G	A	T	C	G	T	T	C	T
1055	Delta	>116163|1|265	G	G	T	T	T	A	T	A	C	C	T	T	C	C	C	A	G	G	T	A	A	C	A	A	A	C	C	G	A	T	C	T	C	T	T	G	T	A	G	A	T	C	G	T	T	C	T
1056	Delta	>115659|1|265	G	G	T	T	T	A	T	A	C	C	T	T	C	C	C	A	G	G	T	A	A	C	A	A	A	C	C	G	A	T	C	T	C	T	T	G	T	A	G	A	T	C	G	T	T	C	T
1057	Delta	>115652|1|265	G	G	T	T	T	A	T	A	C	C	T	T	C	C	C	A	G	G	T	A	A	C	A	A	A	C	C	G	A	T	C	T	C	T	T	G	T	A	G	A	T	C	G	T	T	C	T
1058	Delta	>115651|1|265	G	G	T	T	T	A	T	A	C	C	T	T	C	C	C	A	G	G	T	A	A	C	A	A	A	C	C	G	A	T	C	T	C	T	T	G	T	A	G	A	T	C	G	T	T	C	T
1059	Delta	>115650|1|265	G	G	T	T	T	A	T	A	C	C	T	T	C	C	C	A	G	G	T	A	A	C	A	A	A	C	C	G	A	T	C	T	C	T	T	G	T	A	G	A	T	C	G	T	T	C	T
1060	Delta	>115649|1|265	G	G	T	T	T	A	T	A	C	C	T	T	C	C	C	A	G	G	T	A	A	C	A	A	A	C	C	G	A	T	C	T	C	T	T	G	T	A	G	A	T	C	G	T	T	C	T
1061	Delta	>115648|1|265	G	G	T	T	T	A	T	A	C	C	T	T	C	C	C	A	G	G	T	A	A	C	A	A	A	C	C	G	A	T	C	T	C	T	T	G	T	A	G	A	T	C	G	T	T	C	T
1062	Delta	>115647|1|265	G	G	T	T	T	A	T	A	C	C	T	T	C	C	C	A	G	G	T	A	A	C	A	A	A	C	C	G	A	T	C	T	C	T	T	G	T	A	G	A	T	C	G	T	T	C	T
1063	Delta	>115646|1|265	G	G	T	T	T	A	T	A	C	C	T	T	C	C	C	A	G	G	T	A	A	C	A	A	A	C	C	G	A	T	C	T	C	T	T	G	T	A	G	A	T	C	G	T	T	C	T
1064	Delta	>115645|1|265	G	G	T	T	T	A	T	A	C	C	T	T	C	C	C	A	G	G	T	A	A	C	A	A	A	C	C	G	A	T	C	T	C	T	T	G	T	A	G	A	T	C	G	T	T	C	T
1065	Delta	>115644|1|265	G	G	T	T	T	A	T	A	C	C	T	T	C	C	C	A	G	G	T	A	A	C	A	A	A	C	C	G	A	T	C	T	C	T	T	G	T	A	G	A	T	C	G	T	T	C	T
1066	Delta	>115643|1|265	G	G	T	T	T	A	T	A	C	C	T	T	C	C	C	A	G	G	T	A	A	C	A	A	A	C	C	G	A	T	C	T	C	T	T	G	T	A	G	A	T	C	G	T	T	C	T
1067	Delta	>115642|1|265	G	G	T	T	T	A	T	A	C	C	T	T	C	C	C	A	G	G	T	A	A	C	A	A	A	C	C	G	A	T	C	T	C	T	T	G	T	A	G	A	T	C	G	T	T	C	T
1068	Delta	>115641|1|265	G	G	T	T	T	A	T	A	C	C	T	T	C	C	C	A	G	G	T	A	A	C	A	A	A	C	C	G	A	T	C	T	C	T	T	G	T	A	G	A	T	C	G	T	T	C	T
1069	Delta	>115640|1|265	G	G	T	T	T	A	T	A	C	C	T	T	C	C	C	A	G	G	T	A	A	C	A	A	A	C	C	G	A	T	C	T	C	T	T	G	T	A	G	A	T	C	G	T	T	C	T
1070	Delta	>115639|1|265	G	G	T	T	T	A	T	A	C	C	T	T	C	C	C	A	G	G	T	A	A	C	A	A	A	C	C	G	A	T	C	T	C	T	T	G	T	A	G	A	T	C	G	T	T	C	T
1071	Delta	>115638|1|265	G	G	T	T	T	A	T	A	C	C	T	T	C	C	C	A	G	G	T	A	A	C	A	A	A	C	C	G	A	T	C	T	C	T	T	G	T	A	G	A	T	C	G	T	T	C	T
1072	Delta	>115637|1|265	G	G	T	T	T	A	T	A	C	C	T	T	C	C	C	A	G	G	T	A	A	C	A	A	A	C	C	G	A	T	C	T	C	T	T	G	T	A	G	A	T	C	G	T	T	C	T
1073	Delta	>115636|1|265	G	G	T	T	T	A	T	A	C	C	T	T	C	C	C	A	G	G	T	A	A	C	A	A	A	C	C	G	A	T	C	T	C	T	T	G	T	A	G	A	T	C	G	T	T	C	T
1074	Delta	>115635|1|265	G	G	T	T	T	A	T	A	C	C	T	T	C	C	C	A	G	G	T	A	A	C	A	A	A	C	C	G	A	T	C	T	C	T	T	G	T	A	G	A	T	C	G	T	T	C	T
1075	Delta	>115634|1|265	G	G	T	T	T	A	T	A	C	C	T	T	C	C	C	A	G	G	T	A	A	C	A	A	A	C	C	G	A	T	C	T	C	T	T	G	T	A	G	A	T	C	G	T	T	C	T
1076	Delta	>115633|1|265	G	G	T	T	T	A	T	A	C	C	T	T	C	C	C	A	G	G	T	A	A	C	A	A	A	C	C	G	A	T	C	T	C	T	T	G	T	A	G	A	T	C	G	T	T	C	T
1077	Delta	>115631|1|265	G	G	T	T	T	A	T	A	C	C	T	T	C	C	C	A	G	G	T	A	A	C	A	A	A	C	C	G	A	T	C	T	C	T	T	G	T	A	G	A	T	C	G	T	T	C	T
1078	Delta	>115630|1|265	G	G	T	T	T	A	T	A	C	C	T	T	C	C	C	A	G	G	T	A	A	C	A	A	A	C	C	G	A	T	C	T	C	T	T	G	T	A	G	A	T	C	G	T	T	C	T
1079	Delta	>115629|1|265	G	G	T	T	T	A	T	A	C	C	T	T	C	C	C	A	G	G	T	A	A	C	A	A	A	C	C	G	A	T	C	T	C	T	T	G	T	A	G	A	T	C	G	T	T	C	T
1080	Delta	>115628|1|265	G	G	T	T	T	A	T	A	C	C	T	T	C	C	C	A	G	G	T	A	A	C	A	A	A	C	C	G	A	T	C	T	C	T	T	G	T	A	G	A	T	C	G	T	T	C	T
1081	Delta	>115627|1|265	G	G	T	T	T	A	T	A	C	C	T	T	C	C	C	A	G	G	T	A	A	C	A	A	A	C	C	G	A	T	C	T	C	T	T	G	T	A	G	A	T	C	G	T	T	C	T
1082	Delta	>115626|1|265	G	G	T	T	T	A	T	A	C	C	T	T	C	C	C	A	G	G	T	A	A	C	A	A	A	C	C	G	A	T	C	T	C	T	T	G	T	A	G	A	T	C	G	T	T	C	T
1083	Delta	>115625|1|265	G	G	T	T	T	A	T	A	C	C	T	T	C	C	C	A	G	G	T	A	A	C	A	A	A	C	C	G	A	T	C	T	C	T	T	G	T	A	G	A	T	C	G	T	T	C	T
1084	Delta	>115624|1|265	G	G	T	T	T	A	T	A	C	C	T	T	C	C	C	A	G	G	T	A	A	C	A	A	A	C	C	G	A	T	C	T	C	T	T	G	T	A	G	A	T	C	G	T	T	C	T
1085	Delta	>115623|1|265	G	G	T	T	T	A	T	A	C	C	T	T	C	C	C	A	G	G	T	A	A	C	A	A	A	C	C	G	A	T	C	T	C	T	T	G	T	A	G	A	T	C	G	T	T	C	T
1086	Delta	>115622|1|265	G	G	T	T	T	A	T	A	C	C	T	T	C	C	C	A	G	G	T	A	A	C	A	A	A	C	C	G	A	T	C	T	C	T	T	G	T	A	G	A	T	C	G	T	T	C	T
1087	Delta	>115621|1|265	G	G	T	T	T	A	T	A	C	C	T	T	C	C	C	A	G	G	T	A	A	C	A	A	A	C	C	G	A	T	C	T	C	T	T	G	T	A	G	A	T	C	G	T	T	C	T
1088	Delta	>115620|1|265	G	G	T	T	T	A	T	A	C	C	T	T	C	C	C	A	G	G	T	A	A	C	A	A	A	C	C	G	A	T	C	T	C	T	T	G	T	A	G	A	T	C	G	T	T	C	T
1089	Delta	>115619|1|265	G	G	T	T	T	A	T	A	C	C	T	T	C	C	C	A	G	G	T	A	A	C	A	A	A	C	C	G	A	T	C	T	C	T	T	G	T	A	G	A	T	C	G	T	T	C	T
1090	Delta	>115618|1|265	G	G	T	T	T	A	T	A	C	C	T	T	C	C	C	A	G	G	T	A	A	C	A	A	A	C	C	G	A	T	C	T	C	T	T	G	T	A	G	A	T	C	G	T	T	C	T
1091	Delta	>115617|1|265	G	G	T	T	T	A	T	A	C	C	T	T	C	C	C	A	G	G	T	A	A	C	A	A	A	C	C	G	A	T	C	T	C	T	T	G	T	A	G	A	T	C	G	T	T	C	T
1092	Delta	>115616|1|265	G	G	T	T	T	A	T	A	C	C	T	T	C	C	C	A	G	G	T	A	A	C	A	A	A	C	C	G	A	T	C	T	C	T	T	G	T	A	G	A	T	C	G	T	T	C	T
1093	Delta	>115615|1|265	G	G	T	T	T	A	T	A	C	C	T	T	C	C	C	A	G	G	T	A	A	C	A	A	A	C	C	G	A	T	C	T	C	T	T	G	T	A	G	A	T	C	G	T	T	C	T
1094	Delta	>115614|1|265	G	G	T	T	T	A	T	A	C	C	T	T	C	C	C	A	G	G	T	A	A	C	A	A	A	C	C	G	A	T	C	T	C	T	T	G	T	A	G	A	T	C	G	T	T	C	T
1095	Delta	>115613|1|265	G	G	T	T	T	A	T	A	C	C	T	T	C	C	C	A	G	G	T	A	A	C	A	A	A	C	C	G	A	T	C	T	C	T	T	G	T	A	G	A	T	C	G	T	T	C	T
1096	Delta	>115612|1|265	G	G	T	T	T	A	T	A	C	C	T	T	C	C	C	A	G	G	T	A	A	C	A	A	A	C	C	G	A	T	C	T	C	T	T	G	T	A	G	A	T	C	G	T	T	C	T
1097	Delta	>115611|1|265	G	G	T	T	T	A	T	A	C	C	T	T	C	C	C	A	G	G	T	A	A	C	A	A	A	C	C	G	A	T	C	T	C	T	T	G	T	A	G	A	T	C	G	T	T	C	T
1098	Delta	>115610|1|265	G	G	T	T	T	A	T	A	C	C	T	T	C	C	C	A	G	G	T	A	A	C	A	A	A	C	C	G	A	T	C	T	C	T	T	G	T	A	G	A	T	C	G	T	T	C	T
1099	Delta	>115609|1|265	G	G	T	T	T	A	T	A	C	C	T	T	C	C	C	A	G	G	T	A	A	C	A	A	A	C	C	G	A	T	C	T	C	T	T	G	T	A	G	A	T	C	G	T	T	C	T
1100	Delta	>115608|1|265	G	G	T	T	T	A	T	A	C	C	T	T	C	C	C	A	G	G	T	A	A	C	A	A	A	C	C	G	A	T	C	T	C	T	T	G	T	A	G	A	T	C	G	T	T	C	T
1101	Delta	>115607|1|265	G	G	T	T	T	A	T	A	C	C	T	T	C	C	C	A	G	G	T	A	A	C	A	A	A	C	C	G	A	T	C	T	C	T	T	G	T	A	G	A	T	C	G	T	T	C	T
1102	Delta	>115606|1|265	G	G	T	T	T	A	T	A	C	C	T	T	C	C	C	A	G	G	T	A	A	C	A	A	A	C	C	G	A	T	C	T	C	T	T	G	T	A	G	A	T	C	G	T	T	C	T
1103	Delta	>115605|1|265	G	G	T	T	T	A	T	A	C	C	T	T	C	C	C	A	G	G	T	A	A	C	A	A	A	C	C	G	A	T	C	T	C	T	T	G	T	A	G	A	T	C	G	T	T	C	T
1104	Delta	>115604|1|265	G	G	T	T	T	A	T	A	C	C	T	T	C	C	C	A	G	G	T	A	A	C	A	A	A	C	C	G	A	T	C	T	C	T	T	G	T	A	G	A	T	C	G	T	T	C	T
1105	Delta	>115603|1|265	G	G	T	T	T	A	T	A	C	C	T	T	C	C	C	A	G	G	T	A	A	C	A	A	A	C	C	G	A	T	C	T	C	T	T	G	T	A	G	A	T	C	G	T	T	C	T
1106	Delta	>115602|1|265	G	G	T	T	T	A	T	A	C	C	T	T	C	C	C	A	G	G	T	A	A	C	A	A	A	C	C	G	A	T	C	T	C	T	T	G	T	A	G	A	T	C	G	T	T	C	T
1107	Delta	>115601|1|265	G	G	T	T	T	A	T	A	C	C	T	T	C	C	C	A	G	G	T	A	A	C	A	A	A	C	C	G	A	T	C	T	C	T	T	G	T	A	G	A	T	C	G	T	T	C	T
1108	Delta	>115600|1|265	G	G	T	T	T	A	T	A	C	C	T	T	C	C	C	A	G	G	T	A	A	C	A	A	A	C	C	G	A	T	C	T	C	T	T	G	T	A	G	A	T	C	G	T	T	C	T
1109	Delta	>115599|1|265	G	G	T	T	T	A	T	A	C	C	T	T	C	C	C	A	G	G	T	A	A	C	A	A	A	C	C	G	A	T	C	T	C	T	T	G	T	A	G	A	T	C	G	T	T	C	T
1110	Delta	>115598|1|265	G	G	T	T	T	A	T	A	C	C	T	T	C	C	C	A	G	G	T	A	A	C	A	A	A	C	C	G	A	T	C	T	C	T	T	G	T	A	G	A	T	C	G	T	T	C	T
1111	Delta	>115597|1|265	G	G	T	T	T	A	T	A	C	C	T	T	C	C	C	A	G	G	T	A	A	C	A	A	A	C	C	G	A	T	C	T	C	T	T	G	T	A	G	A	T	C	G	T	T	C	T
1112	Delta	>115596|1|265	G	G	T	T	T	A	T	A	C	C	T	T	C	C	C	A	G	G	T	A	A	C	A	A	A	C	C	G	A	T	C	T	C	T	T	G	T	A	G	A	T	C	G	T	T	C	T
1113	Delta	>115594|1|265	G	G	T	T	T	A	T	A	C	C	T	T	C	C	C	A	G	G	T	A	A	C	A	A	A	C	C	G	A	T	C	T	C	T	T	G	T	A	G	A	T	C	G	T	T	C	T
1114	Delta	>115593|1|265	G	G	T	T	T	A	T	A	C	C	T	T	C	C	C	A	G	G	T	A	A	C	A	A	A	C	C	G	A	T	C	T	C	T	T	G	T	A	G	A	T	C	G	T	T	C	T
1115	Delta	>115592|1|265	G	G	T	T	T	A	T	A	C	C	T	T	C	C	C	A	G	G	T	A	A	C	A	A	A	C	C	G	A	T	C	T	C	T	T	G	T	A	G	A	T	C	G	T	T	C	T
1116	Delta	>115591|1|265	G	G	T	T	T	A	T	A	C	C	T	T	C	C	C	A	G	G	T	A	A	C	A	A	A	C	C	G	A	T	C	T	C	T	T	G	T	A	G	A	T	C	G	T	T	C	T
1117	Delta	>115590|1|265	G	G	T	T	T	A	T	A	C	C	T	T	C	C	C	A	G	G	T	A	A	C	A	A	A	C	C	G	A	T	C	T	C	T	T	G	T	A	G	A	T	C	G	T	T	C	T
1118	Delta	>115589|1|265	G	G	T	T	T	A	T	A	C	C	T	T	C	C	C	A	G	G	T	A	A	C	A	A	A	C	C	G	A	T	C	T	C	T	T	G	T	A	G	A	T	C	G	T	T	C	T
1119	Delta	>115588|1|265	G	G	T	T	T	A	T	A	C	C	T	T	C	C	C	A	G	G	T	A	A	C	A	A	A	C	C	G	A	T	C	T	C	T	T	G	T	A	G	A	T	C	G	T	T	C	T
1120	Delta	>115587|1|265	G	G	T	T	T	A	T	A	C	C	T	T	C	C	C	A	G	G	T	A	A	C	A	A	A	C	C	G	A	T	C	T	C	T	T	G	T	A	G	A	T	C	G	T	T	C	T
1121	Delta	>115586|1|265	G	G	T	T	T	A	T	A	C	C	T	T	C	C	C	A	G	G	T	A	A	C	A	A	A	C	C	G	A	T	C	T	C	T	T	G	T	A	G	A	T	C	G	T	T	C	T
1122	Delta	>115585|1|265	G	G	T	T	T	A	T	A	C	C	T	T	C	C	C	A	G	G	T	A	A	C	A	A	A	C	C	G	A	T	C	T	C	T	T	G	T	A	G	A	T	C	G	T	T	C	T
1123	Delta	>115584|1|265	G	G	T	T	T	A	T	A	C	C	T	T	C	C	C	A	G	G	T	A	A	C	A	A	A	C	C	G	A	T	C	T	C	T	T	G	T	A	G	A	T	C	G	T	T	C	T
1124	Delta	>115583|1|265	G	G	T	T	T	A	T	A	C	C	T	T	C	C	C	A	G	G	T	A	A	C	A	A	A	C	C	G	A	T	C	T	C	T	T	G	T	A	G	A	T	C	G	T	T	C	T
1125	Delta	>115582|1|265	G	G	T	T	T	A	T	A	C	C	T	T	C	C	C	A	G	G	T	A	A	C	A	A	A	C	C	G	A	T	C	T	C	T	T	G	T	A	G	A	T	C	G	T	T	C	T
1126	Delta	>115581|1|265	G	G	T	T	T	A	T	A	C	C	T	T	C	C	C	A	G	G	T	A	A	C	A	A	A	C	C	G	A	T	C	T	C	T	T	G	T	A	G	A	T	C	G	T	T	C	T
1127	Delta	>115580|1|265	G	G	T	T	T	A	T	A	C	C	T	T	C	C	C	A	G	G	T	A	A	C	A	A	A	C	C	G	A	T	C	T	C	T	T	G	T	A	G	A	T	C	G	T	T	C	T
1128	Delta	>115579|1|265	G	G	T	T	T	A	T	A	C	C	T	T	C	C	C	A	G	G	T	A	A	C	A	A	A	C	C	G	A	T	C	T	C	T	T	G	T	A	G	A	T	C	G	T	T	C	T
1129	Delta	>115578|1|265	G	G	T	T	T	A	T	A	C	C	T	T	C	C	C	A	G	G	T	A	A	C	A	A	A	C	C	G	A	T	C	T	C	T	T	G	T	A	G	A	T	C	G	T	T	C	T
1130	Delta	>115577|1|265	G	G	T	T	T	A	T	A	C	C	T	T	C	C	C	A	G	G	T	A	A	C	A	A	A	C	C	G	A	T	C	T	C	T	T	G	T	A	G	A	T	C	G	T	T	C	T
1131	Delta	>115576|1|265	G	G	T	T	T	A	T	A	C	C	T	T	C	C	C	A	G	G	T	A	A	C	A	A	A	C	C	G	A	T	C	T	C	T	T	G	T	A	G	A	T	C	G	T	T	C	T
1132	Delta	>115575|1|265	G	G	T	T	T	A	T	A	C	C	T	T	C	C	C	A	G	G	T	A	A	C	A	A	A	C	C	G	A	T	C	T	C	T	T	G	T	A	G	A	T	C	G	T	T	C	T
1133	Delta	>115574|1|265	G	G	T	T	T	A	T	A	C	C	T	T	C	C	C	A	G	G	T	A	A	C	A	A	A	C	C	G	A	T	C	T	C	T	T	G	T	A	G	A	T	C	G	T	T	C	T
1134	Delta	>115573|1|265	G	G	T	T	T	A	T	A	C	C	T	T	C	C	C	A	G	G	T	A	A	C	A	A	A	C	C	G	A	T	C	T	C	T	T	G	T	A	G	A	T	C	G	T	T	C	T
1135	Delta	>115572|1|265	G	G	T	T	T	A	T	A	C	C	T	T	C	C	C	A	G	G	T	A	A	C	A	A	A	C	C	G	A	T	C	T	C	T	T	G	T	A	G	A	T	C	G	T	T	C	T
1136	Delta	>115571|1|265	G	G	T	T	T	A	T	A	C	C	T	T	C	C	C	A	G	G	T	A	A	C	A	A	A	C	C	G	A	T	C	T	C	T	T	G	T	A	G	A	T	C	G	T	T	C	T
1137	Delta	>115570|1|265	G	G	T	T	T	A	T	A	C	C	T	T	C	C	C	A	G	G	T	A	A	C	A	A	A	C	C	G	A	T	C	T	C	T	T	G	T	A	G	A	T	C	G	T	T	C	T
1138	Delta	>115569|1|265	G	G	T	T	T	A	T	A	C	C	T	T	C	C	C	A	G	G	T	A	A	C	A	A	A	C	C	G	A	T	C	T	C	T	T	G	T	A	G	A	T	C	G	T	T	C	T
1139	Delta	>115568|1|265	G	G	T	T	T	A	T	A	C	C	T	T	C	C	C	A	G	G	T	A	A	C	A	A	A	C	C	G	A	T	C	T	C	T	T	G	T	A	G	A	T	C	G	T	T	C	T
1140	Delta	>115567|1|265	G	G	T	T	T	A	T	A	C	C	T	T	C	C	C	A	G	G	T	A	A	C	A	A	A	C	C	G	A	T	C	T	C	T	T	G	T	A	G	A	T	C	G	T	T	C	T
1141	Delta	>115566|1|265	G	G	T	T	T	A	T	A	C	C	T	T	C	C	C	A	G	G	T	A	A	C	A	A	A	C	C	G	A	T	C	T	C	T	T	G	T	A	G	A	T	C	G	T	T	C	T
1142	Delta	>115565|1|265	G	G	T	T	T	A	T	A	C	C	T	T	C	C	C	A	G	G	T	A	A	C	A	A	A	C	C	G	A	T	C	T	C	T	T	G	T	A	G	A	T	C	G	T	T	C	T
1143	Delta	>115564|1|265	G	G	T	T	T	A	T	A	C	C	T	T	C	C	C	A	G	G	T	A	A	C	A	A	A	C	C	G	A	T	C	T	C	T	T	G	T	A	G	A	T	C	G	T	T	C	T
1144	Delta	>115562|1|265	G	G	T	T	T	A	T	A	C	C	T	T	C	C	C	A	G	G	T	A	A	C	A	A	A	C	C	G	A	T	C	T	C	T	T	G	T	A	G	A	T	C	G	T	T	C	T
1145	Delta	>115561|1|265	G	G	T	T	T	A	T	A	C	C	T	T	C	C	C	A	G	G	T	A	A	C	A	A	A	C	C	G	A	T	C	T	C	T	T	G	T	A	G	A	T	C	G	T	T	C	T
1146	Delta	>115560|1|265	G	G	T	T	T	A	T	A	C	C	T	T	C	C	C	A	G	G	T	A	A	C	A	A	A	C	C	G	A	T	C	T	C	T	T	G	T	A	G	A	T	C	G	T	T	C	T
1147	Delta	>115559|1|265	G	G	T	T	T	A	T	A	C	C	T	T	C	C	C	A	G	G	T	A	A	C	A	A	A	C	C	G	A	T	C	T	C	T	T	G	T	A	G	A	T	C	G	T	T	C	T
1148	Delta	>115558|1|265	G	G	T	T	T	A	T	A	C	C	T	T	C	C	C	A	G	G	T	A	A	C	A	A	A	C	C	G	A	T	C	T	C	T	T	G	T	A	G	A	T	C	G	T	T	C	T
1149	Delta	>115557|1|265	G	G	T	T	T	A	T	A	C	C	T	T	C	C	C	A	G	G	T	A	A	C	A	A	A	C	C	G	A	T	C	T	C	T	T	G	T	A	G	A	T	C	G	T	T	C	T
1150	Delta	>115556|1|265	G	G	T	T	T	A	T	A	C	C	T	T	C	C	C	A	G	G	T	A	A	C	A	A	A	C	C	G	A	T	C	T	C	T	T	G	T	A	G	A	T	C	G	T	T	C	T
1151	Delta	>115554|1|265	G	G	T	T	T	A	T	A	C	C	T	T	C	C	C	A	G	G	T	A	A	C	A	A	A	C	C	G	A	T	C	T	C	T	T	G	T	A	G	A	T	C	G	T	T	C	T
1152	Delta	>115553|1|265	G	G	T	T	T	A	T	A	C	C	T	T	C	C	C	A	G	G	T	A	A	C	A	A	A	C	C	G	A	T	C	T	C	T	T	G	T	A	G	A	T	C	G	T	T	C	T
1153	Delta	>115552|1|265	G	G	T	T	T	A	T	A	C	C	T	T	C	C	C	A	G	G	T	A	A	C	A	A	A	C	C	G	A	T	C	T	C	T	T	G	T	A	G	A	T	C	G	T	T	C	T
1154	Delta	>115551|1|265	G	G	T	T	T	A	T	A	C	C	T	T	C	C	C	A	G	G	T	A	A	C	A	A	A	C	C	G	A	T	C	T	C	T	T	G	T	A	G	A	T	C	G	T	T	C	T
1155	Delta	>115550|1|265	G	G	T	T	T	A	T	A	C	C	T	T	C	C	C	A	G	G	T	A	A	C	A	A	A	C	C	G	A	T	C	T	C	T	T	G	T	A	G	A	T	C	G	T	T	C	T
1156	Delta	>115549|1|265	G	G	T	T	T	A	T	A	C	C	T	T	C	C	C	A	G	G	T	A	A	C	A	A	A	C	C	G	A	T	C	T	C	T	T	G	T	A	G	A	T	C	G	T	T	C	T
1157	Delta	>115548|1|265	G	G	T	T	T	A	T	A	C	C	T	T	C	C	C	A	G	G	T	A	A	C	A	A	A	C	C	G	A	T	C	T	C	T	T	G	T	A	G	A	T	C	G	T	T	C	T
1158	Delta	>115547|1|265	G	G	T	T	T	A	T	A	C	C	T	T	C	C	C	A	G	G	T	A	A	C	A	A	A	C	C	G	A	T	C	T	C	T	T	G	T	A	G	A	T	C	G	T	T	C	T
1159	Delta	>115546|1|265	G	G	T	T	T	A	T	A	C	C	T	T	C	C	C	A	G	G	T	A	A	C	A	A	A	C	C	G	A	T	C	T	C	T	T	G	T	A	G	A	T	C	G	T	T	C	T
1160	Delta	>115545|1|265	G	G	T	T	T	A	T	A	C	C	T	T	C	C	C	A	G	G	T	A	A	C	A	A	A	C	C	G	A	T	C	T	C	T	T	G	T	A	G	A	T	C	G	T	T	C	T
1161	Delta	>115544|1|265	G	G	T	T	T	A	T	A	C	C	T	T	C	C	C	A	G	G	T	A	A	C	A	A	A	C	C	G	A	T	C	T	C	T	T	G	T	A	G	A	T	C	G	T	T	C	T
1162	Delta	>115543|1|265	G	G	T	T	T	A	T	A	C	C	T	T	C	C	C	A	G	G	T	A	A	C	A	A	A	C	C	G	A	T	C	T	C	T	T	G	T	A	G	A	T	C	G	T	T	C	T
1163	Delta	>115542|1|265	G	G	T	T	T	A	T	A	C	C	T	T	C	C	C	A	G	G	T	A	A	C	A	A	A	C	C	G	A	T	C	T	C	T	T	G	T	A	G	A	T	C	G	T	T	C	T
1164	Delta	>115541|1|265	G	G	T	T	T	A	T	A	C	C	T	T	C	C	C	A	G	G	T	A	A	C	A	A	A	C	C	G	A	T	C	T	C	T	T	G	T	A	G	A	T	C	G	T	T	C	T
1165	Delta	>115540|1|265	G	G	T	T	T	A	T	A	C	C	T	T	C	C	C	A	G	G	T	A	A	C	A	A	A	C	C	G	A	T	C	T	C	T	T	G	T	A	G	A	T	C	G	T	T	C	T
1166	Delta	>115539|1|265	G	G	T	T	T	A	T	A	C	C	T	T	C	C	C	A	G	G	T	A	A	C	A	A	A	C	C	G	A	T	C	T	C	T	T	G	T	A	G	A	T	C	G	T	T	C	T
1167	Delta	>115538|1|265	G	G	T	T	T	A	T	A	C	C	T	T	C	C	C	A	G	G	T	A	A	C	A	A	A	C	C	G	A	T	C	T	C	T	T	G	T	A	G	A	T	C	G	T	T	C	T
1168	Delta	>115537|1|265	G	G	T	T	T	A	T	A	C	C	T	T	C	C	C	A	G	G	T	A	A	C	A	A	A	C	C	G	A	T	C	T	C	T	T	G	T	A	G	A	T	C	G	T	T	C	T
1169	Delta	>115536|1|265	G	G	T	T	T	A	T	A	C	C	T	T	C	C	C	A	G	G	T	A	A	C	A	A	A	C	C	G	A	T	C	T	C	T	T	G	T	A	G	A	T	C	G	T	T	C	T
1170	Delta	>115535|1|265	G	G	T	T	T	A	T	A	C	C	T	T	C	C	C	A	G	G	T	A	A	C	A	A	A	C	C	G	A	T	C	T	C	T	T	G	T	A	G	A	T	C	G	T	T	C	T
1171	Delta	>115534|1|265	G	G	T	T	T	A	T	A	C	C	T	T	C	C	C	A	G	G	T	A	A	C	A	A	A	C	C	G	A	T	C	T	C	T	T	G	T	A	G	A	T	C	G	T	T	C	T
1172	Delta	>115533|1|265	G	G	T	T	T	A	T	A	C	C	T	T	C	C	C	A	G	G	T	A	A	C	A	A	A	C	C	G	A	T	C	T	C	T	T	G	T	A	G	A	T	C	G	T	T	C	T
1173	Delta	>115532|1|265	G	G	T	T	T	A	T	A	C	C	T	T	C	C	C	A	G	G	T	A	A	C	A	A	A	C	C	G	A	T	C	T	C	T	T	G	T	A	G	A	T	C	G	T	T	C	T
1174	Delta	>115531|1|265	G	G	T	T	T	A	T	A	C	C	T	T	C	C	C	A	G	G	T	A	A	C	A	A	A	C	C	G	A	T	C	T	C	T	T	G	T	A	G	A	T	C	G	T	T	C	T
1175	Delta	>115530|1|265	G	G	T	T	T	A	T	A	C	C	T	T	C	C	C	A	G	G	T	A	A	C	A	A	A	C	C	G	A	T	C	T	C	T	T	G	T	A	G	A	T	C	G	T	T	C	T
1176	Delta	>115529|1|265	G	G	T	T	T	A	T	A	C	C	T	T	C	C	C	A	G	G	T	A	A	C	A	A	A	C	C	G	A	T	C	T	C	T	T	G	T	A	G	A	T	C	G	T	T	C	T
1177	Delta	>115528|1|265	G	G	T	T	T	A	T	A	C	C	T	T	C	C	C	A	G	G	T	A	A	C	A	A	A	C	C	G	A	T	C	T	C	T	T	G	T	A	G	A	T	C	G	T	T	C	T
1178	Delta	>115527|1|265	G	G	T	T	T	A	T	A	C	C	T	T	C	C	C	A	G	G	T	A	A	C	A	A	A	C	C	G	A	T	C	T	C	T	T	G	T	A	G	A	T	C	G	T	T	C	T
1179	Delta	>115526|1|265	G	G	T	T	T	A	T	A	C	C	T	T	C	C	C	A	G	G	T	A	A	C	A	A	A	C	C	G	A	T	C	T	C	T	T	G	T	A	G	A	T	C	G	T	T	C	T
1180	Delta	>115524|1|265	G	G	T	T	T	A	T	A	C	C	T	T	C	C	C	A	G	G	T	A	A	C	A	A	A	C	C	G	A	T	C	T	C	T	T	G	T	A	G	A	T	C	G	T	T	C	T
1181	Delta	>115523|1|265	G	G	T	T	T	A	T	A	C	C	T	T	C	C	C	A	G	G	T	A	A	C	A	A	A	C	C	G	A	T	C	T	C	T	T	G	T	A	G	A	T	C	G	T	T	C	T
1182	Delta	>115522|1|265	G	G	T	T	T	A	T	A	C	C	T	T	C	C	C	A	G	G	T	A	A	C	A	A	A	C	C	G	A	T	C	T	C	T	T	G	T	A	G	A	T	C	G	T	T	C	T
1183	Delta	>115521|1|265	G	G	T	T	T	A	T	A	C	C	T	T	C	C	C	A	G	G	T	A	A	C	A	A	A	C	C	G	A	T	C	T	C	T	T	G	T	A	G	A	T	C	G	T	T	C	T
1184	Delta	>115519|1|265	G	G	T	T	T	A	T	A	C	C	T	T	C	C	C	A	G	G	T	A	A	C	A	A	A	C	C	G	A	T	C	T	C	T	T	G	T	A	G	A	T	C	G	T	T	C	T
1185	Delta	>115518|1|265	G	G	T	T	T	A	T	A	C	C	T	T	C	C	C	A	G	G	T	A	A	C	A	A	A	C	C	G	A	T	C	T	C	T	T	G	T	A	G	A	T	C	G	T	T	C	T
1186	Delta	>115517|1|265	G	G	T	T	T	A	T	A	C	C	T	T	C	C	C	A	G	G	T	A	A	C	A	A	A	C	C	G	A	T	C	T	C	T	T	G	T	A	G	A	T	C	G	T	T	C	T
1187	Delta	>115516|1|265	G	G	T	T	T	A	T	A	C	C	T	T	C	C	C	A	G	G	T	A	A	C	A	A	A	C	C	G	A	T	C	T	C	T	T	G	T	A	G	A	T	C	G	T	T	C	T
1188	Delta	>115515|1|265	G	G	T	T	T	A	T	A	C	C	T	T	C	C	C	A	G	G	T	A	A	C	A	A	A	C	C	G	A	T	C	T	C	T	T	G	T	A	G	A	T	C	G	T	T	C	T
1189	Delta	>115514|1|265	G	G	T	T	T	A	T	A	C	C	T	T	C	C	C	A	G	G	T	A	A	C	A	A	A	C	C	G	A	T	C	T	C	T	T	G	T	A	G	A	T	C	G	T	T	C	T
1190	Delta	>115513|1|265	G	G	T	T	T	A	T	A	C	C	T	T	C	C	C	A	G	G	T	A	A	C	A	A	A	C	C	G	A	T	C	T	C	T	T	G	T	A	G	A	T	C	G	T	T	C	T
1191	Delta	>115512|1|265	G	G	T	T	T	A	T	A	C	C	T	T	C	C	C	A	G	G	T	A	A	C	A	A	A	C	C	G	A	T	C	T	C	T	T	G	T	A	G	A	T	C	G	T	T	C	T
1192	Delta	>115511|1|265	G	G	T	T	T	A	T	A	C	C	T	T	C	C	C	A	G	G	T	A	A	C	A	A	A	C	C	G	A	T	C	T	C	T	T	G	T	A	G	A	T	C	G	T	T	C	T
1193	Delta	>115510|1|265	G	G	T	T	T	A	T	A	C	C	T	T	C	C	C	A	G	G	T	A	A	C	A	A	A	C	C	G	A	T	C	T	C	T	T	G	T	A	G	A	T	C	G	T	T	C	T
1194	Delta	>115509|1|265	G	G	T	T	T	A	T	A	C	C	T	T	C	C	C	A	G	G	T	A	A	C	A	A	A	C	C	G	A	T	C	T	C	T	T	G	T	A	G	A	T	C	G	T	T	C	T
1195	Delta	>115508|1|265	G	G	T	T	T	A	T	A	C	C	T	T	C	C	C	A	G	G	T	A	A	C	A	A	A	C	C	G	A	T	C	T	C	T	T	G	T	A	G	A	T	C	G	T	T	C	T
1196	Delta	>115507|1|265	G	G	T	T	T	A	T	A	C	C	T	T	C	C	C	A	G	G	T	A	A	C	A	A	A	C	C	G	A	T	C	T	C	T	T	G	T	A	G	A	T	C	G	T	T	C	T
1197	Delta	>115506|1|265	G	G	T	T	T	A	T	A	C	C	T	T	C	C	C	A	G	G	T	A	A	C	A	A	A	C	C	G	A	T	C	T	C	T	T	G	T	A	G	A	T	C	G	T	T	C	T
1198	Delta	>115505|1|265	G	G	T	T	T	A	T	A	C	C	T	T	C	C	C	A	G	G	T	A	A	C	A	A	A	C	C	G	A	T	C	T	C	T	T	G	T	A	G	A	T	C	G	T	T	C	T
1199	Delta	>115504|1|265	G	G	T	T	T	A	T	A	C	C	T	T	C	C	C	A	G	G	T	A	A	C	A	A	A	C	C	G	A	T	C	T	C	T	T	G	T	A	G	A	T	C	G	T	T	C	T
1200	Delta	>115503|1|265	G	G	T	T	T	A	T	A	C	C	T	T	C	C	C	A	G	G	T	A	A	C	A	A	A	C	C	G	A	T	C	T	C	T	T	G	T	A	G	A	T	C	G	T	T	C	T
1201	Delta	>115502|1|265	G	G	T	T	T	A	T	A	C	C	T	T	C	C	C	A	G	G	T	A	A	C	A	A	A	C	C	G	A	T	C	T	C	T	T	G	T	A	G	A	T	C	G	T	T	C	T
1202	Delta	>115501|1|265	G	G	T	T	T	A	T	A	C	C	T	T	C	C	C	A	G	G	T	A	A	C	A	A	A	C	C	G	A	T	C	T	C	T	T	G	T	A	G	A	T	C	G	T	T	C	T
1203	Delta	>115500|1|265	G	G	T	T	T	A	T	A	C	C	T	T	C	C	C	A	G	G	T	A	A	C	A	A	A	C	C	G	A	T	C	T	C	T	T	G	T	A	G	A	T	C	G	T	T	C	T
1204	Delta	>115499|1|265	G	G	T	T	T	A	T	A	C	C	T	T	C	C	C	A	G	G	T	A	A	C	A	A	A	C	C	G	A	T	C	T	C	T	T	G	T	A	G	A	T	C	G	T	T	C	T
1205	Delta	>115498|1|265	G	G	T	T	T	A	T	A	C	C	T	T	C	C	C	A	G	G	T	A	A	C	A	A	A	C	C	G	A	T	C	T	C	T	T	G	T	A	G	A	T	C	G	T	T	C	T
1206	Delta	>115497|1|265	G	G	T	T	T	A	T	A	C	C	T	T	C	C	C	A	G	G	T	A	A	C	A	A	A	C	C	G	A	T	C	T	C	T	T	G	T	A	G	A	T	C	G	T	T	C	T
1207	Delta	>115496|1|265	G	G	T	T	T	A	T	A	C	C	T	T	C	C	C	A	G	G	T	A	A	C	A	A	A	C	C	G	A	T	C	T	C	T	T	G	T	A	G	A	T	C	G	T	T	C	T
1208	Delta	>115495|1|265	G	G	T	T	T	A	T	A	C	C	T	T	C	C	C	A	G	G	T	A	A	C	A	A	A	C	C	G	A	T	C	T	C	T	T	G	T	A	G	A	T	C	G	T	T	C	T
1209	Delta	>115494|1|265	G	G	T	T	T	A	T	A	C	C	T	T	C	C	C	A	G	G	T	A	A	C	A	A	A	C	C	G	A	T	C	T	C	T	T	G	T	A	G	A	T	C	G	T	T	C	T
1210	Delta	>115493|1|265	G	G	T	T	T	A	T	A	C	C	T	T	C	C	C	A	G	G	T	A	A	C	A	A	A	C	C	G	A	T	C	T	C	T	T	G	T	A	G	A	T	C	G	T	T	C	T
1211	Delta	>115492|1|265	G	G	T	T	T	A	T	A	C	C	T	T	C	C	C	A	G	G	T	A	A	C	A	A	A	C	C	G	A	T	C	T	C	T	T	G	T	A	G	A	T	C	G	T	T	C	T
1212	Delta	>115491|1|265	G	G	T	T	T	A	T	A	C	C	T	T	C	C	C	A	G	G	T	A	A	C	A	A	A	C	C	G	A	T	C	T	C	T	T	G	T	A	G	A	T	C	G	T	T	C	T
1213	Delta	>115490|1|265	G	G	T	T	T	A	T	A	C	C	T	T	C	C	C	A	G	G	T	A	A	C	A	A	A	C	C	G	A	T	C	T	C	T	T	G	T	A	G	A	T	C	G	T	T	C	T
1214	Delta	>115489|1|265	G	G	T	T	T	A	T	A	C	C	T	T	C	C	C	A	G	G	T	A	A	C	A	A	A	C	C	G	A	T	C	T	C	T	T	G	T	A	G	A	T	C	G	T	T	C	T
1215	Delta	>115488|1|265	G	G	T	T	T	A	T	A	C	C	T	T	C	C	C	A	G	G	T	A	A	C	A	A	A	C	C	G	A	T	C	T	C	T	T	G	T	A	G	A	T	C	G	T	T	C	T
1216	Delta	>115487|1|265	G	G	T	T	T	A	T	A	C	C	T	T	C	C	C	A	G	G	T	A	A	C	A	A	A	C	C	G	A	T	C	T	C	T	T	G	T	A	G	A	T	C	G	T	T	C	T
1217	Delta	>115486|1|265	G	G	T	T	T	A	T	A	C	C	T	T	C	C	C	A	G	G	T	A	A	C	A	A	A	C	C	G	A	T	C	T	C	T	T	G	T	A	G	A	T	C	G	T	T	C	T
1218	Delta	>115485|1|265	G	G	T	T	T	A	T	A	C	C	T	T	C	C	C	A	G	G	T	A	A	C	A	A	A	C	C	G	A	T	C	T	C	T	T	G	T	A	G	A	T	C	G	T	T	C	T
1219	Delta	>115484|1|265	G	G	T	T	T	A	T	A	C	C	T	T	C	C	C	A	G	G	T	A	A	C	A	A	A	C	C	G	A	T	C	T	C	T	T	G	T	A	G	A	T	C	G	T	T	C	T
1220	Delta	>115483|1|265	G	G	T	T	T	A	T	A	C	C	T	T	C	C	C	A	G	G	T	A	A	C	A	A	A	C	C	G	A	T	C	T	C	T	T	G	T	A	G	A	T	C	G	T	T	C	T
1221	Delta	>115482|1|265	G	G	T	T	T	A	T	A	C	C	T	T	C	C	C	A	G	G	T	A	A	C	A	A	A	C	C	G	A	T	C	T	C	T	T	G	T	A	G	A	T	C	G	T	T	C	T
1222	Delta	>115481|1|265	G	G	T	T	T	A	T	A	C	C	T	T	C	C	C	A	G	G	T	A	A	C	A	A	A	C	C	G	A	T	C	T	C	T	T	G	T	A	G	A	T	C	G	T	T	C	T
1223	Delta	>115480|1|265	G	G	T	T	T	A	T	A	C	C	T	T	C	C	C	A	G	G	T	A	A	C	A	A	A	C	C	G	A	T	C	T	C	T	T	G	T	A	G	A	T	C	G	T	T	C	T
1224	Delta	>115479|1|265	G	G	T	T	T	A	T	A	C	C	T	T	C	C	C	A	G	G	T	A	A	C	A	A	A	C	C	G	A	T	C	T	C	T	T	G	T	A	G	A	T	C	G	T	T	C	T
1225	Delta	>115478|1|265	G	G	T	T	T	A	T	A	C	C	T	T	C	C	C	A	G	G	T	A	A	C	A	A	A	C	C	G	A	T	C	T	C	T	T	G	T	A	G	A	T	C	G	T	T	C	T
1226	Delta	>115477|1|265	G	G	T	T	T	A	T	A	C	C	T	T	C	C	C	A	G	G	T	A	A	C	A	A	A	C	C	G	A	T	C	T	C	T	T	G	T	A	G	A	T	C	G	T	T	C	T
1227	Delta	>115476|1|265	G	G	T	T	T	A	T	A	C	C	T	T	C	C	C	A	G	G	T	A	A	C	A	A	A	C	C	G	A	T	C	T	C	T	T	G	T	A	G	A	T	C	G	T	T	C	T
1228	Delta	>115475|1|265	G	G	T	T	T	A	T	A	C	C	T	T	C	C	C	A	G	G	T	A	A	C	A	A	A	C	C	G	A	T	C	T	C	T	T	G	T	A	G	A	T	C	G	T	T	C	T
1229	Delta	>115474|1|265	G	G	T	T	T	A	T	A	C	C	T	T	C	C	C	A	G	G	T	A	A	C	A	A	A	C	C	G	A	T	C	T	C	T	T	G	T	A	G	A	T	C	G	T	T	C	T
1230	Delta	>115473|1|265	G	G	T	T	T	A	T	A	C	C	T	T	C	C	C	A	G	G	T	A	A	C	A	A	A	C	C	G	A	T	C	T	C	T	T	G	T	A	G	A	T	C	G	T	T	C	T
1231	Delta	>115472|1|265	G	G	T	T	T	A	T	A	C	C	T	T	C	C	C	A	G	G	T	A	A	C	A	A	A	C	C	G	A	T	C	T	C	T	T	G	T	A	G	A	T	C	G	T	T	C	T
1232	Delta	>115471|1|265	G	G	T	T	T	A	T	A	C	C	T	T	C	C	C	A	G	G	T	A	A	C	A	A	A	C	C	G	A	T	C	T	C	T	T	G	T	A	G	A	T	C	G	T	T	C	T
1233	Delta	>115470|1|265	G	G	T	T	T	A	T	A	C	C	T	T	C	C	C	A	G	G	T	A	A	C	A	A	A	C	C	G	A	T	C	T	C	T	T	G	T	A	G	A	T	C	G	T	T	C	T
1234	Delta	>115469|1|265	G	G	T	T	T	A	T	A	C	C	T	T	C	C	C	A	G	G	T	A	A	C	A	A	A	C	C	G	A	T	C	T	C	T	T	G	T	A	G	A	T	C	G	T	T	C	T
1235	Delta	>115468|1|265	G	G	T	T	T	A	T	A	C	C	T	T	C	C	C	A	G	G	T	A	A	C	A	A	A	C	C	G	A	T	C	T	C	T	T	G	T	A	G	A	T	C	G	T	T	C	T
1236	Delta	>115467|1|265	G	G	T	T	T	A	T	A	C	C	T	T	C	C	C	A	G	G	T	A	A	C	A	A	A	C	C	G	A	T	C	T	C	T	T	G	T	A	G	A	T	C	G	T	T	C	T
1237	Delta	>115466|1|265	G	G	T	T	T	A	T	A	C	C	T	T	C	C	C	A	G	G	T	A	A	C	A	A	A	C	C	G	A	T	C	T	C	T	T	G	T	A	G	A	T	C	G	T	T	C	T
1238	Delta	>115465|1|265	G	G	T	T	T	A	T	A	C	C	T	T	C	C	C	A	G	G	T	A	A	C	A	A	A	C	C	G	A	T	C	T	C	T	T	G	T	A	G	A	T	C	G	T	T	C	T
1239	Delta	>115464|1|265	G	G	T	T	T	A	T	A	C	C	T	T	C	C	C	A	G	G	T	A	A	C	A	A	A	C	C	G	A	T	C	T	C	T	T	G	T	A	G	A	T	C	G	T	T	C	T
1240	Delta	>115463|1|265	G	G	T	T	T	A	T	A	C	C	T	T	C	C	C	A	G	G	T	A	A	C	A	A	A	C	C	G	A	T	C	T	C	T	T	G	T	A	G	A	T	C	G	T	T	C	T
1241	Delta	>115462|1|265	G	G	T	T	T	A	T	A	C	C	T	T	C	C	C	A	G	G	T	A	A	C	A	A	A	C	C	G	A	T	C	T	C	T	T	G	T	A	G	A	T	C	G	T	T	C	T
1242	Delta	>115427|1|265	G	G	T	T	T	A	T	A	C	C	T	T	C	C	C	A	G	G	T	A	A	C	A	A	A	C	C	G	A	T	C	T	C	T	T	G	T	A	G	A	T	C	G	T	T	C	T
1243	Delta	>115426|1|265	G	G	T	T	T	A	T	A	C	C	T	T	C	C	C	A	G	G	T	A	A	C	A	A	A	C	C	G	A	T	C	T	C	T	T	G	T	A	G	A	T	C	G	T	T	C	T
1244	Delta	>115425|1|265	G	G	T	T	T	A	T	A	C	C	T	T	C	C	C	A	G	G	T	A	A	C	A	A	A	C	C	G	A	T	C	T	C	T	T	G	T	A	G	A	T	C	G	T	T	C	T
1245	Delta	>115424|1|265	G	G	T	T	T	A	T	A	C	C	T	T	C	C	C	A	G	G	T	A	A	C	A	A	A	C	C	G	A	T	C	T	C	T	T	G	T	A	G	A	T	C	G	T	T	C	T
[truncated: 5,775 more rows]
[truncated: 157 more columns]
