# Supplementary material for: High frequency of transition to transversion ratio in the stem region of RNA secondary structure of untranslated region of SARS-CoV-2
Source: PeerJ. 2024 Apr 22;12:e16962. doi: 10.7717/peerj.16962 (PMC11044879; doi:10.7717/peerj.16962)
Supplement: Supplemental Information 3 — These alignments of high-coverage sequences were extracted on 24th July 2020 from the GISAID database sampled from patients representing an early stage of the adaptation phase of SARS-CoV-2 pandemic in the human population. [file peerj-12-16962-s003.xlsx]

## Sheet: SL-II
	34	35	36	37	38	39	40	41	42	43	44	45	46	47	48	49	50	51	52	53	54	55	56	57	58	59
NC_045512.2	A	A	C	C	A	A	C	T	T	T	C	G	A	T	C	T	C	T	T	G	T	A	G	A	T	C
SLStructureDot-Bracket	.	.	.	[	[	[	.	.	.	.	.	(	(	(	(	(	.	]	]	]	.	)	)	)	)	)
>hCoV-19/env/Wuhan/IVDC-HBF13-20/2020|EPI_ISL_4085|1|265	A	A	C	C	A	A	C	T	T	T	C	G	A	T	A	T	C	T	T	G	T	A	G	A	T	C
>hCoV-19/France/BFC6053/2020|EPI_ISL_443307|2020-0|1|265	A	A	T	C	A	A	C	T	T	T	C	G	A	T	C	T	C	T	T	G	T	A	G	A	T	C
>hCoV-19/USA/WA-UW89/2020|EPI_ISL_416445|2020-03-1|1|265	A	A	C	C	A	A	C	T	T	T	C	G	A	T	C	T	C	T	T	G	T	C	G	A	T	C

## Sheet: SL-V
Info	130	131	132	133	134	135	136	137	138	139	140	141	142	143	144	145	146
NC_045512.2	T	A	A	T	T	A	A	T	A	A	C	T	A	A	T	T	A
SLStructureDot-Bracket	(	(	(	(	(	(	.	.	.	.	.	)	)	)	)	)	)
>hCoV-19/USA/CT-CDC-8001/2020|EPI_ISL_454645|2020-|1|265	T	A	A	T	T	A	A	T	A	A	C	C	A	A	T	T	A
>hCoV-19/Wuhan/IPBCAMS-WH-02/2019|EPI_ISL_403931|2|1|265	T	A	A	T	T	A	A	T	A	A	C	T	A	A	T	T	A

## Sheet: SL-VI
Info	180	181	182	183	184	185	186	187	188	189	190	191	192	193	194	195	196	197	198	199	200	201	202	203	204	205	206	207	208	209	210	211	212	213	214	215	216	217	218	219	220	221	222	223	224	225	226	227	228
NC_045512.2	C	T	T	C	T	G	C	A	G	G	C	T	G	C	T	T	A	C	G	G	T	T	T	C	G	T	C	C	G	T	G	T	T	G	C	A	G	C	C	G	A	T	C	A	T	C	A	G	C
SLStructureDot-Bracket	(	(	(	(	(	(	.	.	(	(	(	(	(	(	.	(	(	(	(	(	.	.	.	.	.	.	)	)	)	)	)	.	.	)	)	)	)	)	)	.	.	.	.	.	.	)	)	)	(
>hCoV-19/USA/CT-CDC-8001/2020|EPI_ISL_454645|2020-|1|265	C	C	T	C	T	G	C	A	G	G	C	T	G	C	T	T	A	C	G	G	T	T	T	C	G	T	C	C	G	T	G	T	T	G	C	A	G	C	C	G	A	T	C	A	T	C	A	G	C
>hCoV-19/USA/LA-EVTL155/2020|EPI_ISL_455998|2020-0|1|265	C	T	T	C	G	G	C	A	G	G	C	T	G	C	T	T	A	C	G	G	T	T	T	C	G	T	C	C	G	T	G	T	T	G	C	A	G	C	C	G	A	T	C	A	T	C	A	G	C
>hCoV-19/Poland/PL_P1/2020|EPI_ISL_416488|2020-03-|1|265	C	T	T	C	T	G	C	A	G	G	C	T	G	C	T	T	A	C	A	G	T	T	T	C	G	T	C	C	G	T	G	T	T	G	C	A	G	C	C	G	A	T	C	A	T	C	A	G	C
>hCoV-19/England/OXON-B15C3/2020|EPI_ISL_479027|20|1|265	C	T	T	C	T	G	C	A	G	G	C	T	G	C	T	T	A	C	G	G	T	T	T	C	C	T	C	C	G	T	G	T	T	G	C	A	G	C	C	G	A	T	C	A	T	C	A	G	C
>hCoV-19/Bangladesh/BCSIR-NILMRC_107/2020|EPI_ISL_|1|265	C	T	T	C	T	G	C	A	G	G	C	T	G	C	T	T	A	C	G	G	T	T	T	C	G	T	C	C	G	T	G	T	T	G	C	A	A	C	C	G	A	T	C	A	T	C	A	G	C
>hCoV-19/USA/PA-MGEL75/2020|EPI_ISL_454361|2020-03|1|265	C	T	T	C	T	G	C	A	G	G	C	T	G	C	T	T	A	C	G	G	T	T	T	C	G	T	C	C	G	T	G	T	T	G	C	A	G	C	C	G	A	T	C	A	C	C	A	G	C
>hCoV-19/Sweden/20-50279/2020|EPI_ISL_455903|2020-|1|265	C	T	T	C	T	G	C	A	G	G	C	T	G	C	T	T	A	C	G	G	T	T	T	C	G	T	C	C	G	T	G	T	T	G	C	A	G	C	C	G	A	T	C	A	T	C	A	G	C
>hCoV-19/Wuhan/HB-WH4-212/2020|EPI_ISL_454961|2020|1|265	C	T	T	C	T	G	C	A	G	G	C	T	G	C	T	T	A	C	G	G	T	T	T	C	G	T	C	C	G	T	G	T	T	G	C	A	G	C	C	G	A	T	C	A	T	C	A	G	C
>hCoV-19/Poland/PL_P10/2020|EPI_ISL_451971|2020-04|1|265	C	T	T	C	T	G	C	A	G	G	C	T	G	C	T	T	A	C	G	G	T	T	T	C	G	T	C	C	G	T	G	T	T	G	C	A	G	C	C	G	A	T	C	A	T	C	A	G	C
>hCoV-19/USA/MO-WUSTL046/2020|EPI_ISL_493075|2020-|1|265	C	T	T	C	T	G	C	A	G	G	C	T	G	C	T	T	A	C	G	G	T	T	T	C	G	T	C	C	G	T	G	T	T	G	C	A	G	C	C	G	A	T	C	A	T	C	A	G	C
>hCoV-19/mink/Netherlands/NB03_index/2020|EPI_ISL_|1|265	C	T	T	C	T	G	C	A	G	G	C	T	G	C	T	T	A	C	G	G	T	T	T	C	G	T	C	C	G	T	G	T	T	G	C	A	G	C	C	G	A	T	C	A	T	C	A	G	C
>hCoV-19/Sweden/20-51831/2020|EPI_ISL_475532|2020-|1|265	C	T	T	C	T	G	C	A	G	G	C	T	G	C	T	T	A	C	G	G	T	T	T	C	G	T	C	C	G	T	G	T	T	G	C	A	G	C	C	G	A	T	C	A	T	C	A	G	C
>hCoV-19/England/20169018304/2020|EPI_ISL_465202|2|1|265	C	T	T	C	T	G	C	A	G	G	C	T	G	C	T	T	A	C	G	G	T	T	T	C	G	T	C	C	G	T	G	T	T	G	C	A	G	C	C	G	A	T	C	A	T	C	A	G	C
>hCoV-19/pangolin/Guangdong/1/2019|EPI_ISL_410721||1|265	C	T	T	C	T	G	C	A	G	G	C	T	G	C	T	T	A	C	G	G	T	T	T	C	G	T	C	C	G	T	G	T	T	G	C	A	G	C	C	G	A	T	C	A	T	C	A	G	C
>hCoV-19/Taiwan/TSGH-13/2020|EPI_ISL_428230|2020-0|1|265	C	T	T	C	T	G	C	A	G	G	C	T	G	C	T	T	A	C	G	G	T	T	T	C	G	T	C	C	G	T	G	T	T	G	C	A	G	C	C	G	A	T	C	A	T	C	A	G	T
>hCoV-19/USA/CA-CSMC20/2020|EPI_ISL_475630|2020-03|1|265	C	T	T	C	T	G	C	A	G	G	C	T	G	C	T	T	A	C	G	G	T	T	T	C	G	T	C	C	G	T	G	T	T	G	C	A	G	C	C	G	A	T	C	T	T	C	A	G	C
>hCoV-19/Taiwan/NTU28/2020|EPI_ISL_447622|2020-04-|1|265	C	T	T	C	T	G	C	A	G	G	C	T	G	C	T	T	A	C	G	G	T	T	T	C	G	T	C	C	G	T	G	T	T	G	C	A	G	C	C	G	A	T	T	A	T	C	A	G	C
>hCoV-19/England/OXON-AFD0C/2020|EPI_ISL_478822|20|1|265	C	T	T	C	T	G	C	A	G	G	C	T	G	C	T	T	A	C	G	G	T	T	T	C	G	T	C	C	G	T	G	T	T	G	C	A	G	C	C	G	A	T	T	A	T	C	A	G	C
>hCoV-19/Poland/IHG_PAS_4_67/2020|EPI_ISL_485399|2|1|265	C	T	T	C	T	G	C	A	G	G	C	T	G	C	T	T	A	C	G	G	T	T	T	C	G	T	C	C	G	T	G	T	T	G	C	A	G	C	C	T	A	T	C	A	T	C	A	G	C
>hCoV-19/UnitedArabEmirates/L1189/2020|EPI_ISL_469|1|265	C	T	T	C	T	G	C	A	G	G	C	T	G	C	T	T	A	C	G	G	T	T	T	C	G	T	C	C	G	T	G	T	T	G	C	A	G	T	C	G	A	T	C	A	T	C	A	G	C
>hCoV-19/France/GE1977/2020|EPI_ISL_414632|2020-03|1|265	C	T	T	C	T	G	C	A	G	G	C	T	G	C	T	T	A	C	G	G	T	T	T	C	G	T	C	C	G	T	T	T	T	G	C	A	G	C	C	G	A	T	C	A	T	C	A	G	C
>hCoV-19/USA/OR-PROV-095/2020|EPI_ISL_482366|2020-|1|265	C	T	T	C	T	G	C	A	G	G	C	T	G	C	T	T	A	C	G	G	T	T	T	C	G	T	C	C	T	T	G	T	T	G	C	A	G	C	C	G	A	T	C	A	T	C	A	G	C
>hCoV-19/India/NCDC-4189/2020|EPI_ISL_436450|2020-|1|265	C	T	T	C	T	G	C	A	G	G	C	T	G	C	T	T	A	C	G	G	T	T	T	T	G	T	C	C	G	T	G	T	T	G	C	A	G	C	C	G	A	T	C	A	T	C	A	G	C
>hCoV-19/Sweden/20-14262/2020|EPI_ISL_469055|2020-|1|265	C	T	T	C	T	G	C	A	G	G	C	T	G	C	T	T	A	C	G	G	T	T	T	T	G	T	C	C	G	T	G	T	T	G	C	A	G	C	C	G	A	T	C	A	T	C	A	G	C
>hCoV-19/Taiwan/TSGH-26/2020|EPI_ISL_447252|2020-0|1|265	C	T	T	C	T	G	C	A	G	G	C	T	G	C	T	T	A	C	G	T	T	T	T	C	G	T	C	C	G	T	G	T	T	G	C	A	G	C	C	G	A	T	C	A	T	C	A	G	C
>hCoV-19/USA/NY-NYUMC878/2020|EPI_ISL_458017|2020-|1|265	C	T	T	C	T	G	C	A	G	G	C	T	G	C	T	T	A	C	G	T	T	T	T	C	G	T	C	C	G	T	G	T	T	G	C	A	G	C	C	G	A	T	C	A	T	C	A	G	C
>hCoV-19/Cyprus/007/2020|EPI_ISL_463747|2020-04-17|1|265	C	T	T	C	T	G	C	G	G	G	C	T	G	C	T	T	A	C	G	G	T	T	T	C	G	T	C	C	G	T	G	T	T	G	C	A	G	C	C	G	A	T	C	A	T	C	A	G	C
[truncated: 37 more columns]

## Sheet: SL-VII
	29675	29676	29677	29678	29679	29680	29681	29682	29683	29684	29685	29686	29687	29688	29689	29690	29691	29692	29693	29694	29695	29696	29697	29698	29699	29700	29701	29702	29703	29704	29705	29706	29707	29708	29709	29710	29711	29712	29713	29714	29715	29716	29717	29718	29719	29720	29721	29722	29723
NC_045512.2	C	A	A	T	C	T	T	T	A	A	T	C	A	G	T	G	T	G	T	A	A	C	A	T	T	A	G	G	G	A	G	G	A	C	T	T	G	A	A	A	G	A	G	C	C	A	C	C	A
	(	(	.	.	.	.	.	.	(	(	(	.	.	.	.	.	.	.	.	.	(	(	(	(	(	(	(	(	(	.	.	.	.	.	.	.	.	.	.	.	.	(	(	(	.	.	(	(	.
>hCoV-19/Indonesia/JKT-EIJK2444/2020|EPI_ISL_43528|29675|29903	C	A	A	T	C	T	T	T	A	A	A	C	A	G	T	G	T	G	T	A	A	C	A	T	T	A	G	G	G	A	G	G	A	C	T	T	G	A	A	A	G	A	G	C	C	A	C	C	A
>hCoV-19/Spain/Barcelona_VH1407/2020|EPI_ISL_44497|29675|29903	C	A	A	T	C	T	T	T	A	A	T	C	A	C	T	G	T	G	T	A	A	C	A	T	T	A	G	G	G	A	G	G	A	C	T	T	G	A	A	A	G	A	G	C	C	A	C	C	A
>hCoV-19/Korea/KCDC2027/2020|EPI_ISL_471443|2020-0|29675|29903	C	A	A	T	C	T	T	T	A	A	T	C	A	G	T	G	T	G	T	A	A	C	A	T	T	A	G	G	G	A	G	G	A	C	T	T	G	A	A	A	G	A	A	C	C	A	C	C	A
>hCoV-19/SaudiArabia/KAUST-Makkah138/2020|EPI_ISL_|29675|29903	C	A	A	T	C	T	T	T	A	A	T	C	A	G	T	G	T	G	T	A	A	C	A	T	T	A	G	G	G	A	G	G	A	C	T	T	G	A	A	A	G	A	G	C	A	A	C	C	A
>hCoV-19/USA/NY-NYUMC451/2020|EPI_ISL_435518|2020-|29675|29903	C	A	A	T	C	T	T	T	A	A	T	C	A	G	T	G	T	G	T	A	A	C	A	T	T	A	G	G	G	A	G	G	A	C	T	T	G	A	A	A	G	A	G	C	C	A	C	C	A
>hCoV-19/USA/NY-NYUMC249/2020|EPI_ISL_428763|2020-|29675|29903	C	A	A	T	C	T	T	T	A	A	T	C	A	G	T	G	T	G	T	A	A	C	A	T	T	A	G	G	G	A	G	G	A	C	T	T	G	A	A	A	G	A	G	C	C	A	C	C	A
>hCoV-19/Sweden/20-51167/2020|EPI_ISL_450832|2020-|29675|29903	C	A	A	T	C	T	T	T	A	A	T	C	A	G	T	G	T	G	T	A	A	C	A	T	T	A	G	G	G	A	G	G	A	C	T	T	G	A	A	A	G	A	G	C	C	A	C	C	A
>hCoV-19/Sichuan/SC-PHCC1-036/2020|EPI_ISL_451357||29675|29903	C	A	A	T	C	T	T	T	A	A	T	C	A	G	T	G	T	G	T	A	A	C	A	T	T	A	G	G	G	A	G	G	A	C	T	T	G	A	A	A	G	A	G	C	C	A	C	C	A
>hCoV-19/USA/CA-CSMC135/2020|EPI_ISL_475613|2020-0|29675|29903	C	A	A	T	C	T	T	T	A	A	T	C	A	G	T	G	T	G	T	A	A	C	A	T	T	A	G	G	G	A	G	G	A	C	T	T	G	A	A	A	G	A	G	C	C	A	C	C	A
>hCoV-19/SaudiArabia/KAUST-Makkah166/2020|EPI_ISL_|29675|29903	C	A	A	T	C	T	T	T	A	A	T	C	A	G	T	G	T	G	T	A	A	C	A	T	T	A	G	G	G	A	G	G	A	C	T	T	G	A	A	A	G	A	G	C	C	A	C	C	A
>hCoV-19/Taiwan/TSGH-19/2020|EPI_ISL_436104|2020-0|29675|29903	C	A	A	T	C	T	T	T	A	A	T	C	A	G	T	G	T	G	T	A	A	C	A	T	T	A	G	G	G	A	G	G	A	C	T	T	G	A	A	A	G	A	G	C	C	A	C	C	A
>hCoV-19/Bangladesh/BCSIR-NILMRC_229/2020|EPI_ISL_|29675|29903	C	A	A	T	C	T	T	T	A	A	T	C	A	G	T	G	T	G	T	A	A	C	A	T	T	A	G	G	G	A	G	G	A	C	T	T	G	A	A	A	G	A	G	C	C	A	C	C	A
>hCoV-19/Bangladesh/BCSIR-NILMRC_126/2020|EPI_ISL_|29675|29903	C	A	A	T	C	T	T	T	A	A	T	C	A	G	T	G	T	G	T	A	A	C	A	T	T	A	G	G	G	A	G	G	A	C	T	T	G	A	A	A	G	A	G	C	C	A	C	C	A
>hCoV-19/USA/NY-NYUMC536/2020|EPI_ISL_444653|2020-|29675|29903	C	A	A	T	C	T	T	T	A	A	T	C	A	G	T	G	T	G	T	A	A	C	A	T	T	A	G	G	G	A	G	G	A	C	T	T	G	A	A	A	G	A	G	C	C	A	C	C	A
>hCoV-19/Bangladesh/BCSIR-NILMRC_227/2020|EPI_ISL_|29675|29903	C	A	A	T	C	T	T	T	A	A	T	C	A	G	T	G	T	G	T	A	A	C	A	T	T	A	G	G	G	A	G	G	A	C	T	T	G	A	A	A	G	A	G	C	C	A	C	C	A
>hCoV-19/USA/NY-NYUMC381/2020|EPI_ISL_430408|2020-|29675|29903	C	A	A	T	C	T	T	T	A	A	T	C	A	G	T	G	T	G	T	A	A	C	A	T	T	A	G	G	G	A	G	G	A	C	T	T	G	A	A	A	G	A	G	C	C	A	C	C	A
>hCoV-19/Bangladesh/BCSIR-NILMRC_091/2020|EPI_ISL_|29675|29903	C	A	A	T	C	T	T	T	A	A	T	C	A	G	T	G	T	G	T	A	A	C	A	T	T	A	G	G	G	A	G	G	A	C	T	T	G	A	A	A	G	A	G	C	C	A	C	C	A
>hCoV-19/USA/NY-NYUMC415/2020|EPI_ISL_435482|2020-|29675|29903	C	A	A	T	C	T	T	T	A	A	T	C	A	G	T	G	T	G	T	A	A	C	A	T	T	A	G	G	G	A	G	G	A	C	T	T	G	A	A	A	G	A	G	C	C	A	C	C	A
>hCoV-19/USA/ID-UW-4376/2020|EPI_ISL_461424|2020-0|29675|29903	C	A	A	T	C	T	T	T	A	A	T	C	A	G	T	G	T	G	T	A	A	C	A	T	T	A	G	G	G	A	G	G	A	C	T	T	G	A	A	A	G	A	G	C	C	A	C	C	A
>hCoV-19/USA/NY-NYUMC445/2020|EPI_ISL_435512|2020-|29675|29903	C	A	A	T	C	T	T	T	A	A	T	C	A	G	T	G	T	G	T	A	A	C	A	T	T	A	G	G	G	A	G	G	A	C	T	T	G	A	A	A	G	A	G	C	C	A	C	C	A
>hCoV-19/Sweden/20-50900/2020|EPI_ISL_475157|2020-|29675|29903	C	A	A	T	C	T	T	T	A	A	T	C	A	G	T	G	T	G	T	A	A	C	A	T	T	A	G	G	G	A	G	G	A	C	T	T	G	A	A	A	G	A	G	C	C	A	C	C	A
>hCoV-19/USA/NJ-NYUMC841/2020|EPI_ISL_456113|2020-|29675|29903	C	A	A	T	C	T	T	T	A	A	T	C	A	G	T	G	T	G	T	A	A	C	A	T	T	A	G	G	G	A	G	G	A	C	T	T	G	A	A	A	G	A	G	C	C	A	C	C	A
>hCoV-19/Sweden/20-14734/2020|EPI_ISL_475520|2020-|29675|29903	C	A	A	T	C	T	T	T	A	A	T	C	A	G	T	G	T	G	T	A	A	C	A	T	T	A	G	G	G	A	G	G	A	C	T	T	G	A	A	A	G	A	G	C	C	A	C	C	A
>hCoV-19/USA/NY-NYUMC127/2020|EPI_ISL_424934|2020-|29675|29903	C	A	A	T	C	T	T	T	A	A	T	C	A	G	T	G	T	G	T	A	A	C	A	T	T	A	G	G	G	A	G	G	A	C	T	T	G	A	A	A	G	A	G	C	C	A	C	C	A
>hCoV-19/USA/CA-CSMC117/2020|EPI_ISL_475593|2020-0|29675|29903	C	A	A	T	C	T	T	T	A	A	T	C	A	G	T	G	T	G	T	A	A	C	A	T	T	A	G	G	G	A	G	G	A	C	T	T	G	A	A	A	G	A	G	C	C	A	C	C	A
>hCoV-19/Wales/PHWC-29C0D/2020|EPI_ISL_432219|2020|29675|29903	C	A	A	T	C	T	T	T	A	A	T	C	A	G	T	G	T	G	T	A	A	C	A	T	T	A	G	G	G	A	G	G	A	C	T	T	G	A	A	A	G	A	G	C	C	A	C	C	A
>hCoV-19/USA/CA-CSMC55/2020|EPI_ISL_475668|2020-04|29675|29903	C	A	A	T	C	T	T	T	A	A	T	C	A	G	T	G	T	G	T	A	A	C	A	T	T	A	G	G	G	A	G	G	A	C	T	T	G	A	A	A	G	A	G	C	C	A	C	C	A
>hCoV-19/USA/NY-NYUMC461/2020|EPI_ISL_435527|2020-|29675|29903	C	A	A	T	C	T	T	T	A	A	T	C	A	G	T	G	T	G	T	A	A	C	A	T	T	A	G	G	G	A	G	G	A	C	T	T	G	A	A	A	G	A	G	C	C	A	C	C	A
>hCoV-19/USA/CA-CSMC122/2020|EPI_ISL_475599|2020-0|29675|29903	C	A	A	T	C	T	T	T	A	A	T	C	A	G	T	G	T	G	T	A	A	C	A	T	T	A	G	G	G	A	G	G	A	C	T	T	G	A	A	A	G	A	G	C	C	A	C	C	A
>hCoV-19/USA/CA-ALSR-1603/2020|EPI_ISL_494684|2020|29675|29903	C	A	A	T	C	T	T	T	A	A	T	C	A	G	T	G	T	G	T	A	A	C	A	T	T	A	G	G	G	A	G	G	A	C	T	T	G	A	A	A	G	A	G	C	C	A	C	C	A
>hCoV-19/Austria/Graz-MUG11/2020|EPI_ISL_437300|20|29675|29903	C	A	A	T	C	T	T	T	A	A	T	C	A	G	T	G	T	G	T	A	A	C	A	T	T	A	G	G	G	A	G	G	A	C	T	T	G	A	A	A	G	A	G	C	C	A	C	C	A
>hCoV-19/Israel/CVL-n-5991/2020|EPI_ISL_475019|202|29675|29903	C	A	A	T	C	T	T	T	A	A	T	C	A	G	T	G	T	G	T	A	A	C	A	T	T	A	G	G	G	A	G	G	A	C	T	T	G	A	A	A	G	A	G	C	C	A	C	C	A
>hCoV-19/Israel/CVL-n-9560/2020|EPI_ISL_474971|202|29675|29903	C	A	A	T	C	T	T	T	A	A	T	C	A	G	T	G	T	G	T	A	A	C	A	T	T	A	G	G	G	A	G	G	A	C	T	T	G	A	A	A	G	A	G	C	C	A	C	C	A
>hCoV-19/USA/CA-CZB-1250/2020|EPI_ISL_454670|2020-|29675|29903	C	A	A	T	C	T	T	T	A	A	T	C	A	G	T	G	T	G	T	A	A	C	A	T	T	A	G	G	G	A	G	G	A	C	T	T	G	A	A	A	G	A	G	C	C	A	C	C	A
>hCoV-19/Sweden/20-14519/2020|EPI_ISL_475517|2020-|29675|29903	C	A	A	T	C	T	T	T	A	A	T	C	A	G	T	G	T	G	T	A	A	C	A	T	T	A	G	G	G	A	G	G	A	C	T	T	G	A	A	A	G	A	G	C	C	A	C	C	A
>hCoV-19/Bangladesh/BCSIR-NILMRC_017/2020|EPI_ISL_|29675|29903	C	A	A	T	C	T	T	T	A	A	T	C	A	G	T	G	T	G	T	A	A	C	A	T	T	A	G	G	G	A	G	G	A	C	T	T	G	A	A	A	G	A	G	C	C	A	C	C	A
>hCoV-19/Italy/FVG-ICGEB_atr21/2020|EPI_ISL_479790|29675|29903	C	A	A	T	C	T	T	T	A	A	T	C	A	G	T	G	T	G	T	A	A	C	A	T	T	A	G	G	G	A	G	G	A	C	T	T	G	A	A	A	G	A	G	C	C	A	C	C	A
>hCoV-19/USA/CA-CSMC56/2020|EPI_ISL_475669|2020-04|29675|29903	C	A	A	T	C	T	T	T	A	A	T	C	A	G	T	G	T	G	T	A	A	C	A	T	T	A	G	G	G	A	G	G	A	C	T	T	G	A	A	A	G	A	G	C	C	A	C	C	A
>hCoV-19/Wuhan/HB-WHCM-107/2020|EPI_ISL_454990|202|29675|29903	C	A	A	T	C	T	T	T	A	A	T	C	A	G	T	G	T	G	T	A	A	C	A	T	T	A	G	G	G	A	G	G	A	C	T	T	G	A	A	A	G	A	G	C	C	A	C	C	A
>hCoV-19/USA/NY-NYUMC410/2020|EPI_ISL_435477|2020-|29675|29903	C	A	A	T	C	T	T	T	A	A	T	C	A	G	T	G	T	G	T	A	A	C	A	T	T	A	G	G	G	A	G	G	A	C	T	T	G	A	A	A	G	A	G	C	C	A	C	C	A
>hCoV-19/USA/OR-PROV-232/2020|EPI_ISL_482467|2020-|29675|29903	C	A	A	T	C	T	T	T	A	A	T	C	A	G	T	G	T	G	T	A	A	C	A	T	T	A	G	G	G	A	G	G	A	C	T	T	G	A	A	A	G	A	G	C	C	A	C	C	A
>hCoV-19/England/OXON-AEA15/2020|EPI_ISL_448747|20|29675|29903	C	A	A	T	C	T	T	T	A	A	T	C	A	G	T	G	T	G	T	A	A	C	A	T	T	A	G	G	G	A	G	G	A	C	T	T	G	A	A	A	G	A	G	C	C	A	C	C	A
>hCoV-19/USA/CA-ALSR-1065-SAN/2020|EPI_ISL_483495||29675|29903	C	A	A	T	C	T	T	T	A	A	T	C	A	G	T	G	T	G	T	A	A	C	A	T	T	A	G	G	G	A	G	G	A	C	T	T	G	A	A	A	G	A	G	C	C	A	C	C	A
>hCoV-19/Romania/284508/2020|EPI_ISL_455471|2020-0|29675|29903	C	A	A	T	C	T	T	T	A	A	T	C	A	G	T	G	T	G	T	A	A	C	A	T	T	A	G	G	G	A	G	G	A	C	T	T	G	A	A	A	G	A	G	C	C	A	C	T	A
>hCoV-19/Sweden/20-50486/2020|EPI_ISL_475143|2020-|29675|29903	C	A	A	T	C	T	T	T	A	A	T	C	A	G	T	G	T	G	T	A	A	C	A	T	T	A	G	G	G	A	G	G	A	C	T	T	T	A	A	A	G	A	G	C	C	A	C	C	A
>hCoV-19/Latvia/047/2020|EPI_ISL_486431|2020-03-16|29675|29903	C	A	A	T	C	T	T	T	A	A	T	C	A	G	T	G	T	G	T	A	A	C	A	T	T	A	G	G	G	A	G	G	A	T	T	T	G	A	A	A	G	A	G	C	C	A	C	C	A
>hCoV-19/England/OXON-AE07D/2020|EPI_ISL_448659|20|29675|29903	C	A	A	T	C	T	T	T	A	A	T	C	A	G	T	G	T	G	T	A	A	C	A	T	T	A	G	G	G	A	G	T	A	C	T	T	G	A	A	A	G	A	G	C	C	A	C	C	A
>hCoV-19/Sweden/20-14785/2020|EPI_ISL_469062|2020-|29675|29903	C	A	A	T	C	T	T	T	A	A	T	C	A	G	T	G	T	G	T	A	A	C	A	T	T	A	G	G	G	A	T	G	A	C	T	T	G	A	A	A	G	A	G	C	C	A	C	C	A
>hCoV-19/Sweden/20-14131/2020|EPI_ISL_475511|2020-|29675|29903	C	A	A	T	C	T	T	T	A	A	T	C	A	G	T	G	T	G	T	A	A	C	A	T	T	A	G	T	G	A	G	G	A	C	T	T	G	A	A	A	G	A	G	C	C	A	C	C	A
>hCoV-19/USA/WA-UW-8150/2020|EPI_ISL_486112|2020-0|29675|29903	C	A	A	T	C	T	T	T	A	A	T	C	A	G	T	G	T	G	T	A	A	C	A	T	T	G	G	G	G	A	G	G	A	C	T	T	G	A	A	A	G	A	G	C	C	A	C	C	A
>hCoV-19/USA/NY-NYUMC894/2020|EPI_ISL_467387|2020-|29675|29903	C	A	A	T	C	T	T	T	A	A	T	C	A	G	T	G	T	G	T	A	A	C	A	T	T	G	G	G	G	A	G	G	A	C	T	T	G	A	A	A	G	A	G	C	C	A	C	C	A
>hCoV-19/Fuyang/FY002/2020|EPI_ISL_424352|2020-03-|29675|29903	C	A	A	T	C	T	T	T	A	A	T	C	A	G	T	G	T	G	T	A	G	C	A	T	T	A	G	G	G	A	G	G	A	C	T	T	G	A	A	A	G	A	G	C	C	A	C	C	A
>hCoV-19/env/Beijing/IVDC-03-06/2020|EPI_ISL_46925|29675|29903	C	A	A	T	C	T	T	T	A	A	T	C	A	G	T	G	T	G	T	C	A	C	A	T	T	A	G	G	G	A	G	G	A	C	T	T	G	A	A	A	G	A	G	C	C	A	C	C	A
>hCoV-19/USA/OR-PROV-087/2020|EPI_ISL_482358|2020-|29675|29903	C	A	A	T	C	T	T	T	A	A	T	C	A	T	T	G	T	G	T	A	A	C	A	T	T	A	G	G	G	A	G	G	A	C	T	T	G	A	A	A	G	A	G	C	C	A	C	C	A
[truncated: 107 more columns]
